# Supplementary material for: Transcriptome and small RNAome profiling uncovers how a recombinant begomovirus evades RDRγ-mediated silencing of viral genes and outcompetes its parental virus in mixed infection
Source: PLoS Pathog. 2024 Jan 12;20(1):e1011941. doi: 10.1371/journal.ppat.1011941 (PMC10810479; doi:10.1371/journal.ppat.1011941)
Supplement: S3 Dataset — For each condition, Illumina 100 nt paired-end reads of the two biological replicates (1 and 2) were mapped onto the reference sequences of IL and IS76 using BWA and the resulting BAM files were analysed by MISIS-2 (Seguin et al. 2016 [60]) to generate tables of reads mapped to each reference sequence with zero mismatches. The reference sequences were extended at the 3-end by 99 nts from the 5’-terminal sequence to allow for mapping RNAs derived from the circular viral genome including the first and last nucleotide of the linear reference. In each table, the first column gives nucleotide positions of the corresponding viral genome sequence. In the next columns, the positions of 5′-terminal nucleotide of sense RNAs and 3′-terminal nucleotide of antisense RNAs along the reference sequence are indicated, and the read counts are given for each RNA mapped with zero mismatches to the forward (rightward) strand (columns fwd1 and fwd2) and the reverse (leftward) strand (columns rev1 and rev2), along with the total counts of reads mapped at the respective positions of the forward (rightward) and reverse (leftward) strands in the two replicates divided by 2 (i.e., average counts). In each table file on the right side, histograms of the average counts of rightward and leftward reads are inserted with the rightward reads colored in blue and the leftward reads colored in red. In the case of mixed infections (IL+IS76), the number of reads derived from each virus was counted at each SNP using MISIS-2 (Seguin et al. 2006 [60]) and a percentage of reads derived from each virus (or its selected region) was calculated. The average percentage at all SNPs of the viral genome (or its selected region) was applied on all parts of the genome (or its selected region) that contain no SNPs to estimate the number of reads derived from the entire genome of each virus (or its selected region) or each strand of the viral genome (or its selected region). (XLSX) [file ppat.1011941.s008.xlsx]

## Sheet: Legend
S3 Dataset. Single nucleotide resolution maps of Illumina mRNA-seq reads representing viral transcripts from susceptible (S) and Ty-1 resistant (R) tomato plants infected with TYLCV-IL, its recombinant derivative TYLCV-IS76 or their combination (IL+IS76) at 10 and 30 days post inoculation (dpi). For each condition, Illumina 100 nt paired-end reads of the two biological replicates (1 and 2) were m…

## Sheet: S-IL 10dpi (IL)
Position	fwd 1	rev 1	fwd 2	rev 2	rightward	leftward
1	0	0	0	0	0	0
2	0	0	0	0	0	0
3	0	0	0	0	0	0
4	0	0	0	0	0	0
5	0	0	0	0	0	0
6	0	0	0	0	0	0
7	0	0	0	0	0	0
8	0	0	0	0	0	0
9	0	0	0	0	0	0
10	0	0	0	0	0	0
11	0.0165847	0	0	0	0.00829235	0
12	0	0	0	0	0	0
13	0	0	0	0	0	0
14	0	0	0	0	0	0
15	0	0	0	0	0	0
16	0	0	0	0	0	0
17	0	0	0	0	0	0
18	0	0	0	0	0	0
19	0	0	0	0	0	0
20	0	0	0	0	0	0
21	0	0	0	0	0	0
22	0	0	0	0	0	0
23	0	0	0	0	0	0
24	0	0	0	0	0	0
25	0	0	0	0	0	0
26	0	0	0	0	0	0
27	0.0165847	0	0	0	0.00829235	0
28	0	0	0	0	0	0
29	0	0	0	0	0	0
30	0	0	0	0	0	0
31	0	0	0	0	0	0
32	0	0	0	0	0	0
33	0	0	0	0	0	0
34	0	0	0	0	0	0
35	0	0	0	0	0	0
36	0	0	0	0	0	0
37	0.0331694	0	0	0	0.0165847	0
38	0	0	0	0	0	0
39	0.0165847	0	0	0	0.00829235	0
40	0	0	0	0	0	0
41	0	0	0	0	0	0
42	0.0165847	0	0	0	0.00829235	0
43	0	0	0	0	0	0
44	0	0	0	0	0	0
45	0	0	0	0	0	0
46	0	0	0	0	0	0
47	0	0	0	0	0	0
48	0	0	0	0	0	0
49	0	0	0	0	0	0
50	0	0	0	0	0	0
51	0	0	0	0	0	0
52	0	0	0	0	0	0
53	0	0	0	0	0	0
54	0	0	0	0	0	0
55	0.0165847	0	0	0	0.00829235	0
56	0	0	0	0	0	0
57	0	0	0	0	0	0
58	0	0	0	0	0	0
59	0.0165847	0	0	0	0.00829235	0
60	0	0	0	0	0	0
61	0.0165847	0	0	0	0.00829235	0
62	0	0	0	0	0	0
63	0	0	0	0	0	0
64	0	0	0	0	0	0
65	0	0	0	0	0	0
66	0	0	0	0	0	0
67	0	0	0.0192893	0	0.00964464	0
68	0	0	0	0	0	0
69	0	0	0	0	0	0
70	0	0	0	0	0	0
71	0	0	0	0	0	0
72	0	0	0	0	0	0
73	0	0	0	0	0	0
74	0.0165847	0	0	0	0.00829235	0
75	0	0	0	0	0	0
76	0.0165847	0	0.0192893	0	0.017937	0
77	0	-0.0331694	0	0	0	-0.0165847
78	0	0	0	0	0	0
79	0.0165847	0	0	0	0.00829235	0
80	0	0	0	0	0	0
81	0	0	0	0	0	0
82	0	0	0	0	0	0
83	0	0	0	0	0	0
84	0	0	0	0	0	0
85	0	0	0	0	0	0
86	0	0	0	0	0	0
87	0	0	0	0	0	0
88	0.0165847	0	0	0	0.00829235	0
89	0	0	0	0	0	0
90	0	0	0	0	0	0
91	0	0	0	0	0	0
92	0	0	0	0	0	0
93	0	0	0	0	0	0
94	0	0	0	0	0	0
95	0	0	0	0	0	0
96	0	0	0	0	0	0
97	0	0	0	0	0	0
98	0	0	0	0	0	0
99	0	0	0	0	0	0
100	0.0331694	0	0.0192893	0	0.0262293	0
101	0	0	0	0	0	0
102	0	0	0	0	0	0
103	0	0	0	0	0	0
104	0	0	0	0	0	0
105	0	0	0	0	0	0
106	0	0	0	0	0	0
107	0	0	0	0	0	0
108	0	0	0.0385786	0	0.0192893	0
109	0.0663388	0	0	0	0.0331694	0
110	0.0331694	0	0	0	0.0165847	0
111	0	0	0	0	0	0
112	0	0	0	0	0	0
113	0	0	0	0	0	0
114	0	0	0	0	0	0
115	0	0	0.0385786	0	0.0192893	0
116	0	0	0	0	0	0
117	0	0	0	0	0	0
118	0	0	0	0	0	0
119	0	0	0	0	0	0
120	0	0	0	0	0	0
121	0	0	0	0	0	0
122	0	0	0.0192893	0	0.00964464	0
123	0	0	0	0	0	0
124	0	0	0	0	0	0
125	0	0	0	0	0	0
126	0	0	0	0	0	0
127	0	0	0	0	0	0
128	0	0	0.0192893	0	0.00964464	0
129	0	0	0	0	0	0
130	0	0	0	0	0	0
131	0	0	0.0385786	0	0.0192893	0
132	0	0	0	0	0	0
133	0.0165847	0	0.0385786	0	0.0275816	0
134	0.0165847	0	0	0	0.00829235	0
135	0	0	0	0	0	0
136	0.0497541	0	0.0385786	0	0.0441663	0
137	0	0	0	0	0	0
138	0	0	0	0	0	0
139	0	0	0	0	0	0
140	0.0165847	0	0.0192893	0	0.017937	0
141	0	0	0	0	0	0
142	0.0165847	0	0.0192893	0	0.017937	0
143	0.0165847	0	0	0	0.00829235	0
144	0	0	0	0	0	0
145	0	0	0	0	0	0
146	0	0	0	0	0	0
147	0	0	0	0	0	0
148	0	0	0.0192893	0	0.00964464	0
149	0	0	0.0192893	0	0.00964464	0
150	0.0165847	0	0.0578678	0	0.0372263	0
151	0.0165847	0	0.0385786	0	0.0275816	0
152	0.149262	0	0.115736	0	0.132499	0
153	0.0165847	-0.0165847	0.0964464	0	0.0565155	-0.00829235
154	0.0165847	0	0.0578678	0	0.0372263	0
155	0	0	0	0	0	0
156	0.53071	0	1.40812	0	0.969414	0
157	0.298524	0	0.559389	0	0.428957	0
158	0.447787	0	1.23451	0	0.84115	0
159	0.182432	0	0.327918	0	0.255175	0
160	0.547295	0	0.983753	0	0.765524	0
161	0.713142	0	0.675125	0	0.694133	0
162	1.16093	0	1.36954	0	1.26523	0
163	0.331694	0	0.405075	0	0.368384	0
164	0.0331694	0	0.0771571	0	0.0551633	0
165	0.182432	0	0.250761	0	0.216596	0
166	0.0829235	0	0.115736	0	0.0993296	0
167	0.0663388	0	0.173604	0	0.119971	0
168	0.199016	0	0.0964464	0	0.147731	0
169	0.149262	0	0.192893	0	0.171078	0
170	0.165847	0	0.231471	0	0.198659	0
171	0.132678	0	0.347207	0	0.239942	0
172	0.0331694	0	0.0771571	0	0.0551633	0
173	0.53071	0	0.520811	0	0.52576	0
174	0.0663388	0	0.192893	0	0.129616	0
175	0.431202	0	0.771571	-0.0192893	0.601387	-0.00964464
176	0.182432	0	0.289339	0	0.235885	0
177	0.480956	0	0.366496	0	0.423726	0
178	0.447787	0	0.520811	0	0.484299	0
179	0.149262	0	0.0964464	0	0.122854	0
180	0.0165847	0	0.0385786	0	0.0275816	0
181	0	0	0.0385786	0	0.0192893	0
182	0.0331694	0	0	0	0.0165847	0
183	0.0663388	0	0.0192893	0	0.042814	0
184	0.0165847	0	0.154314	0	0.0854495	0
185	0.0663388	0	0.154314	0	0.110327	0
186	0.165847	0	0.173604	0	0.169725	0
187	0.28194	0	0.327918	0	0.304929	0
188	0.116093	0	0.115736	0	0.115914	0
189	0.149262	0	0.231471	0	0.190367	0
190	0.298524	0	0.405075	-0.0192893	0.3518	-0.00964464
191	0	0	0	0	0	0
192	0.149262	0	0.308628	0	0.228945	0
193	0.0331694	0	0.0964464	0	0.0648079	0
194	0.165847	0	0.0771571	0	0.121502	0
195	0.0165847	0	0.0385786	0	0.0275816	0
196	0.0331694	0	0	0	0.0165847	0
197	0.298524	0	0.5401	0	0.419312	0
198	0.199016	0	0.154314	0	0.176665	0
199	0.0995082	0	0.154314	0	0.126911	0
200	0.24877	0	0.366496	0	0.307633	0
201	0.116093	0	0.231471	0	0.173782	0
202	0	0	0	0	0	0
203	0.0663388	0	0.115736	0	0.0910372	0
204	0.381448	0	0.27005	0	0.325749	0
205	0	0	0.0385786	0	0.0192893	0
206	0.0497541	0	0.0771571	0	0.0634556	0
207	0.182432	0	0.327918	0	0.255175	0
208	0.116093	0	0.115736	0	0.115914	0
209	0.0165847	0	0.0771571	0	0.0468709	0
210	0.0663388	0	0.0385786	0	0.0524587	0
211	0.0995082	0	0.27005	0	0.184779	0
212	0	0	0	0	0	0
213	0.0331694	0	0.212182	0	0.122676	0
214	0.0995082	0	0.250761	0	0.175134	0
215	0.0995082	0	0.0964464	0	0.0979773	0
216	0	0	0	0	0	0
217	0.331694	0	0.385786	0	0.35874	0
218	0.331694	0	0.443653	0	0.387674	0
219	0.24877	0	0.385786	0	0.317278	0
220	0.0165847	0	0.115736	0	0.0661602	0
221	1.01167	0	1.60101	0	1.30634	0
222	0.199016	0	0.385786	0	0.292401	0
223	0.0663388	0	0	0	0.0331694	0
224	0.630218	0	0.829439	0	0.729829	0
225	0.0663388	0	0.135025	0	0.100682	0
226	0.24877	0	0.385786	0	0.317278	0
227	0.24877	0	0.192893	0	0.220832	0
228	0.116093	0	0.115736	0	0.115914	0
229	0.265355	0	0.231471	0	0.248413	0
230	0	0	0	0	0	0
231	0.0165847	0	0.0578678	0	0.0372263	0
232	0.182432	0	0.347207	0	0.264819	0
233	0.132678	0	0.462943	0	0.29781	0
234	0.348279	0	0.79086	0	0.569569	0
235	0.165847	0	0.250761	0	0.208304	0
236	0.149262	0	0.173604	0	0.161433	0
237	0	0	0.0385786	0	0.0192893	0
238	0	0	0.0771571	0	0.0385786	0
239	0.116093	0	0.27005	0	0.193071	0
240	0.0165847	0	0.0964464	0	0.0565155	0
241	0.447787	0	0.347207	0	0.397497	0
242	0.182432	0	0.231471	0	0.206951	0
243	0.945327	0	0.925885	0	0.935606	0
244	0.149262	0	0.231471	0	0.190367	0
245	0.0497541	0	0.250761	0	0.150257	0
246	0.132678	0	0.308628	0	0.220653	0
247	0.0331694	0	0.0385786	0	0.035874	0
248	0.331694	0	0.385786	0	0.35874	0
249	0	0	0.0578678	0	0.0289339	0
250	0.779481	0	1.2538	0	1.01664	0
251	0.132678	0	0.327918	0	0.230298	0
252	0.0331694	0	0	0	0.0165847	0
253	0.0331694	0	0.0385786	0	0.035874	0
254	0.878989	0	1.63959	0	1.25929	0
255	0.298524	0	0.597968	0	0.448246	0
256	0.0663388	0	0.0964464	0	0.0813926	0
257	0.414617	0	0.655835	0	0.535226	0
258	0.182432	0	0.27005	0	0.226241	0
259	0.0829235	0	0.0964464	0	0.0896849	0
260	0.232186	0	0.5401	0	0.386143	0
261	0.132678	0	0.173604	0	0.153141	0
262	0.149262	0	0.250761	-0.0192893	0.200011	-0.00964464
263	0.232186	0	0.347207	0	0.289696	0
264	0.331694	0	0.482232	0	0.406963	0
265	0.182432	0	0.212182	0	0.197307	0
266	1.29361	0	1.46599	0	1.3798	0
267	0.265355	0	0.308628	0	0.286992	0
268	0.132678	0	0.154314	0	0.143496	0
269	0.0497541	0	0.135025	0	0.0923895	0
270	0.0663388	0	0.135025	0	0.100682	0
271	0.0497541	0	0.115736	0	0.0827449	0
272	0	0	0.0192893	0	0.00964464	0
273	0.0331694	0	0.0964464	0	0.0648079	0
274	0.0497541	0	0.308628	0	0.179191	0
275	0.182432	0	0.212182	0	0.197307	0
276	0.116093	0	0.154314	0	0.135204	0
277	0.0165847	0	0.0578678	0	0.0372263	0
278	0.0497541	0	0.192893	0	0.121323	0
279	0.0331694	0	0	0	0.0165847	0
280	0.928743	0	1.67817	0	1.30346	0
281	0.182432	0	0.0964464	0	0.139439	0
282	0.315109	0	0.212182	0	0.263646	0
283	0.116093	0	0.115736	0	0.115914	0
284	0.431202	0	0.81015	0	0.620676	0
285	2.25552	-0.0165847	3.067	0	2.66126	-0.00829235
286	0.0165847	0	0.0192893	0	0.017937	0
287	0.116093	0	0.115736	0	0.115914	0
288	0	0	0.0192893	0	0.00964464	0
289	0.24877	0	0.308628	0	0.278699	0
290	0.0165847	0	0.0192893	0	0.017937	0
291	0.0165847	0	0.0385786	0	0.0275816	0
292	0.182432	0	0.173604	0	0.178018	0
293	0.0331694	0	0.0385786	0	0.035874	0
294	0.116093	0	0.154314	0	0.135204	0
295	0.0165847	0	0.154314	0	0.0854495	0
296	0.580464	-0.0165847	1.35025	0	0.965357	-0.00829235
297	0.132678	0	0.308628	0	0.220653	0
298	0.165847	0	0.347207	-0.0192893	0.256527	-0.00964464
299	0.149262	0	0.443653	0	0.296458	0
300	0.199016	0	0.385786	0	0.292401	0
301	0.315109	0	0.829439	0	0.572274	0
302	0.265355	0	0.289339	0	0.277347	0
303	0.232186	0	0.154314	0	0.19325	0
304	0.232186	0	0.250761	0	0.241473	0
305	0.28194	0	0.212182	0	0.247061	0
306	0.215601	0	0.289339	0	0.25247	0
307	0.0663388	0	0.0964464	0	0.0813926	0
308	0.0331694	0	0.115736	0	0.0744525	0
309	0.215601	0	0.250761	0	0.233181	0
310	0.995082	0	1.29238	0	1.14373	0
311	0	0	0	0	0	0
312	0.0995082	0	0.115736	0	0.107622	0
313	0.0995082	0	0.192893	0	0.1462	0
314	0.0995082	0	0.231471	0	0.16549	0
315	0.0663388	0	0.366496	0	0.216418	0
316	0.0331694	0	0.0964464	0	0.0648079	0
317	0.199016	0	0.289339	0	0.244178	0
318	0.165847	0	0.347207	0	0.256527	0
319	0.0497541	0	0.0771571	0	0.0634556	0
320	0.928743	0	1.29238	0	1.11056	0
321	0.315109	0	0.5401	0	0.427604	0
322	0.53071	0	1.77461	0	1.15266	0
323	0.298524	0	0.636546	0	0.467535	0
324	0.331694	0	0.694414	0	0.513054	0
325	0.0663388	0	0.115736	0	0.0910372	0
326	0.0663388	0	0.231471	0	0.148905	0
327	0.116093	0	0.0578678	0	0.0869803	0
328	0.165847	0	0.154314	0	0.160081	0
329	0.0995082	0	0.0964464	0	0.0979773	0
330	0.0331694	0	0.0771571	0	0.0551633	0
331	0.514125	0	0.81015	0	0.662138	0
332	1.17751	0	1.83248	0	1.505	0
333	0.464371	0	0.732993	0	0.598682	0
334	0.364863	0	0.597968	0	0.481415	0
335	1.79115	0	2.95126	0	2.3712	0
336	0.182432	0	0.173604	0	0.178018	0
337	0.0829235	0	0.385786	0	0.234355	0
338	0.0663388	0	0.115736	0	0.0910372	0
339	0.0165847	0	0.0192893	0	0.017937	0
340	0.0165847	0	0.0964464	0	0.0565155	0
341	0.0331694	0	0.0964464	0	0.0648079	0
342	0.199016	-0.0165847	0.27005	0	0.234533	-0.00829235
343	0.53071	0	0.868018	0	0.699364	0
344	0.265355	0	0.231471	0	0.248413	0
345	0.56388	0	0.655835	0	0.609858	0
346	0.0829235	0	0.231471	0	0.157197	0
347	0.0497541	0	0.212182	0	0.130968	0
348	0	0	0.0578678	0	0.0289339	0
349	0.165847	0	0.173604	0	0.169725	0
350	0.149262	0	0.115736	0	0.132499	0
351	0.53071	0	1.04162	0	0.786166	0
352	0.265355	0	0.405075	0	0.335215	0
353	0.165847	0	0.559389	0	0.362618	0
354	0.0995082	0	0.462943	0	0.281225	0
355	0.165847	0	0.366496	0	0.266172	0
356	0.878989	0	1.46599	0	1.17249	0
357	0.0331694	0	0.0578678	0	0.0455186	0
358	0.0829235	0	0.0771571	0	0.0800403	0
359	0.0829235	0	0.154314	0	0.118619	0
360	0.182432	0	0.366496	0	0.274464	0
361	0.165847	0	0.327918	0	0.246882	0
362	0.547295	0	0.964464	0	0.755879	0
363	0.0995082	0	0.115736	0	0.107622	0
364	0	0	0	0	0	0
365	0.0829235	0	0.192893	0	0.137908	0
366	0.315109	0	0.424364	0	0.369737	0
367	0.679972	0	0.771571	0	0.725772	0
368	0.547295	0	0.906596	0	0.726945	0
369	0.597049	0	0.868018	0	0.732533	0
370	0.646803	0	1.06091	0	0.853857	0
371	0.232186	0	0.501521	0	0.366853	0
372	0.398033	0	0.848728	0	0.62338	0
373	1.4097	0	1.50456	0	1.45713	0
374	0.0497541	0	0.0192893	0	0.0345217	0
375	0.0663388	0	0.250761	0	0.15855	0
376	0.215601	0	0.212182	0	0.213892	0
377	0.0829235	0	0.0771571	0	0.0800403	0
378	0.0165847	0	0.0385786	0	0.0275816	0
379	0.597049	0	0.617257	0	0.607153	0
380	0.232186	0	0.405075	0	0.31863	0
381	0.464371	0	0.79086	0	0.627616	0
382	0.464371	0	0.347207	0	0.405789	0
383	0.0165847	0	0.115736	0	0.0661602	0
384	0.348279	0	0.443653	0	0.395966	0
385	0.0995082	0	0.154314	0	0.126911	0
386	0.116093	0	0.154314	0	0.135204	0
387	0.182432	0	0.115736	0	0.149084	0
388	0.646803	0	1.0802	0	0.863501	0
389	0.646803	0	0.887307	0	0.767055	0
390	0.165847	0	0.27005	0	0.217948	0
391	0.199016	0	0.192893	0	0.195955	0
392	0.0331694	0	0.0964464	0	0.0648079	0
393	0.878989	0	1.36954	0	1.12426	0
394	0.28194	0	0.250761	0	0.26635	0
395	0.878989	0	0.868018	0	0.873503	0
396	0.149262	0	0.347207	0	0.248235	0
397	0.116093	0	0.405075	0	0.260584	0
398	0.24877	0	0.5401	-0.0192893	0.394435	-0.00964464
399	0.0663388	0	0.0385786	0	0.0524587	0
400	0.116093	0	0.462943	0	0.289518	0
401	0.862404	0	0.79086	0	0.826632	0
402	0.116093	0	0.0964464	0	0.10627	0
403	0.0829235	0	0.0192893	0	0.0511064	0
404	0.315109	0	0.135025	0	0.225067	0
405	0.265355	0	0.27005	0	0.267702	0
406	0.514125	0	0.868018	0	0.691072	0
407	0.779481	0	1.15736	0	0.968419	0
408	0.663388	0	0.752282	0	0.707835	0
409	0.696557	0	0.597968	0	0.647262	0
410	0.364863	0	0.424364	0	0.394614	0
411	0.182432	0	0.0964464	0	0.139439	0
412	0.132678	0	0.0771571	0	0.104917	0
413	0.580464	0	0.713703	0	0.647084	0
414	0.0497541	0	0.0192893	0	0.0345217	0
415	0.116093	0	0.115736	0	0.115914	0
416	0.0995082	0	0.192893	0	0.1462	0
417	0.199016	0	0.366496	0	0.282756	0
418	0.165847	0	0.27005	0	0.217948	0
419	1.1941	0	1.81319	0	1.50365	0
420	1.27702	0	1.48527	0	1.38115	0
421	1.09459	0	1.52385	0	1.30922	0
422	0.630218	0	1.38883	0	1.00952	0
423	0.613634	0	1.04162	0	0.827627	0
424	0.713142	0	0.848728	0	0.780935	0
425	0.116093	0	0.173604	0	0.144848	0
426	0.0165847	0	0.0578678	0	0.0372263	0
427	0.348279	0	0.424364	0	0.386321	0
428	0.182432	0	0.115736	0	0.149084	0
429	0.182432	0	0.347207	0	0.264819	0
430	0.348279	0	0.462943	0	0.405611	0
431	0.298524	0	0.5401	0	0.419312	0
432	0.0497541	0	0.0771571	0	0.0634556	0
433	0.0165847	0	0.0578678	0	0.0372263	0
434	1.11117	-0.0331694	1.63959	0	1.37538	-0.0165847
435	0.149262	0	0.0964464	0	0.122854	0
436	0.762896	0	0.925885	-0.0192893	0.844391	-0.00964464
437	0	0	0	0	0	0
438	1.04484	-0.0165847	1.77461	0	1.40972	-0.00829235
439	0.182432	0	0.385786	0	0.284109	0
440	0.961912	0	1.15736	0	1.05963	0
441	0.829235	0	1.15736	0	0.993296	0
442	0.713142	0	0.5401	0	0.626621	0
443	0.315109	0	0.617257	0	0.466183	0
444	0.414617	0	0.520811	0	0.467714	0
445	0.480956	0	0.752282	0	0.616619	0
446	0.862404	0	0.945175	0	0.903789	0
447	0.149262	0	0.424364	0	0.286813	0
448	0.149262	0	0.154314	0	0.151788	0
449	0.829235	0	0.983753	0	0.906494	0
450	1.14434	0	1.48527	0	1.31481	0
451	0.646803	0	0.945175	0	0.795989	0
452	0.928743	0	1.67817	0	1.30346	0
453	0.0663388	0	0.154314	0	0.110327	0
454	0.24877	0	0.559389	0	0.40408	0
455	0.116093	0	0.231471	0	0.173782	0
456	0.746311	0	0.771571	0	0.758941	0
457	0.497541	0	0.945175	0	0.721358	0
458	0.0663388	0	0.0192893	0	0.042814	0
459	0.199016	0	0.482232	0	0.340624	0
460	0.696557	0	0.694414	0	0.695486	0
461	1.09459	0	0.925885	0	1.01024	0
462	0.165847	0	0.135025	0	0.150436	0
463	0.265355	0	0.424364	0	0.34486	0
464	2.67014	0	2.48832	0	2.57923	0
465	0.132678	0	0.154314	0	0.143496	0
466	2.0565	0	2.97055	0	2.51353	0
467	0.132678	0	0.154314	0	0.143496	0
468	0.961912	-0.0331694	1.63959	0	1.30075	-0.0165847
469	0.199016	0	0.482232	0	0.340624	0
470	0.762896	0	0.829439	0	0.796167	0
471	0.381448	0	0.462943	0	0.422195	0
472	0.132678	0	0.347207	0	0.239942	0
473	0.149262	0	0.115736	0	0.132499	0
474	0.215601	0	0.462943	0	0.339272	0
475	0.132678	0	0.135025	0	0.133851	0
476	0.116093	0	0.135025	0	0.125559	0
477	0.713142	0	1.29238	0	1.00276	0
478	0.480956	0	0.520811	0	0.500883	0
479	0.663388	0	0.655835	0	0.659612	0
480	0.265355	0	0.385786	0	0.32557	0
481	0.480956	0	0.5401	0	0.510528	0
482	0.28194	0	0.308628	0	0.295284	0
483	0.381448	0	0.482232	0	0.43184	0
484	0.215601	0	0.27005	0	0.242825	0
485	0.149262	0	0.0771571	0	0.11321	0
486	0.431202	0	0.5401	0	0.485651	0
487	0.215601	0	0.173604	0	0.194602	0
488	0.713142	0	0.771571	0	0.742356	0
489	0.398033	0	0.289339	0	0.343686	0
490	0.232186	-0.0165847	0.192893	0	0.212539	-0.00829235
491	0.24877	0	0.829439	0	0.539105	0
492	0.0497541	0	0.0578678	0	0.053811	0
493	0.613634	0	0.347207	-0.0192893	0.48042	-0.00964464
494	0.24877	0	0.250761	0	0.249766	0
495	0.149262	0	0.154314	0	0.151788	0
496	0.165847	0	0.308628	0	0.237238	0
497	0.149262	0	0.0964464	0	0.122854	0
498	0.265355	0	0.192893	0	0.229124	0
499	0.497541	0	0.732993	0	0.615267	0
500	1.16093	0	1.90964	0	1.53528	0
501	0.447787	0	0.636546	0	0.542166	0
502	0.265355	0	0.405075	0	0.335215	0
503	0.729726	0	1.11878	0	0.924252	0
504	1.60872	0	1.94822	0	1.77847	0
505	0.364863	0	0.289339	0	0.327101	0
506	0.613634	-0.0165847	0.655835	0	0.634735	-0.00829235
507	0.729726	0	0.675125	0	0.702426	0
508	0.0829235	0	0.308628	0	0.195776	0
509	0.0829235	0	0.212182	0	0.147553	0
510	0.398033	0	0.192893	0	0.295463	0
511	0.265355	0	0.308628	0	0.286992	0
512	0.514125	0	0.5401	0	0.527113	0
513	0.729726	0	1.0802	0	0.904963	0
514	0.24877	0	0.443653	0	0.346212	0
515	0.298524	0	0.289339	0	0.293932	0
516	0.132678	0	0.0771571	0	0.104917	0
517	0.165847	0	0.250761	0	0.208304	0
518	0.613634	0	0.906596	0	0.760115	0
519	0.232186	0	0.192893	0	0.212539	0
520	0.912158	0	1.17665	0	1.0444	0
521	0.116093	0	0.0771571	0	0.096625	0
522	0.431202	0	0.27005	0	0.350626	0
523	0.215601	0	0.27005	0	0.242825	0
524	0.364863	0	1.09949	0	0.732176	0
525	1.01167	-0.0331694	1.77461	0	1.39314	-0.0165847
526	0.165847	0	0.0964464	0	0.131147	0
527	0.149262	0	0.308628	0	0.228945	0
528	0.0829235	0	0.0771571	0	0.0800403	0
529	0.0829235	0	0.27005	0	0.176487	0
530	0.895573	0	0.79086	0	0.843217	0
531	0.0663388	0	0.0964464	0	0.0813926	0
532	0.215601	0	0.27005	0	0.242825	0
533	0.0331694	0	0.115736	0	0.0744525	0
534	1.44287	0	1.67817	0	1.56052	0
535	0.215601	0	0.27005	0	0.242825	0
536	0.116093	0	0.154314	0	0.135204	0
537	0.165847	0	0.424364	0	0.295106	0
538	0.497541	0	0.5401	0	0.51882	0
539	0.464371	0	0.366496	0	0.415434	0
540	0.265355	0	0.27005	0	0.267702	0
541	0.613634	0	0.79086	0	0.702247	0
542	1.26044	0	1.50456	0	1.3825	0
543	0.199016	0	0.308628	0	0.253822	0
544	0.364863	0	0.5401	0	0.452482	0
545	0.331694	0	0.443653	0	0.387674	0
546	0.381448	0	0.405075	0	0.393261	0
547	0.0829235	0	0.0964464	0	0.0896849	0
548	1.26044	0	1.38883	0	1.32463	0
549	0.398033	0	0.424364	0	0.411198	0
550	1.69164	0	2.35329	0	2.02247	0
551	0.315109	0	0.424364	0	0.369737	0
552	0.928743	-0.0165847	1.65888	0	1.29381	-0.00829235
553	0.348279	0	0.443653	0	0.395966	0
554	0.165847	0	0.27005	0	0.217948	0
555	0.182432	0	0.115736	0	0.149084	0
556	0.431202	0	0.675125	0	0.553163	0
557	0.928743	0	1.31167	0	1.12021	0
558	0.0331694	0	0.0964464	0	0.0648079	0
559	0.149262	0	0.154314	0	0.151788	0
560	0.480956	0	0.482232	0	0.481594	0
561	0.696557	0	0.520811	0	0.608684	0
562	0.0995082	0	0.250761	0	0.175134	0
563	0.182432	0	0.212182	0	0.197307	0
564	0.0165847	0	0.0192893	0	0.017937	0
565	0.0663388	0	0.0578678	0	0.0621033	0
566	0.0165847	0	0.0771571	0	0.0468709	0
567	0.132678	0	0.154314	0	0.143496	0
568	0.381448	0	0.250761	0	0.316104	0
569	0.298524	0	0.27005	0	0.284287	0
570	0.132678	0	0.250761	0	0.191719	0
571	0.0995082	0	0.0385786	0	0.0690434	0
572	0.199016	0	0.173604	0	0.18631	0
573	0.497541	0	0.597968	0	0.547754	0
574	3.41645	-0.0165847	4.28222	0	3.84933	-0.00829235
575	2.4877	0	2.73908	0	2.61339	0
576	0.547295	0	0.694414	0	0.620854	0
577	0.132678	0	0.231471	0	0.182074	0
578	0.878989	0	0.771571	0	0.82528	0
579	0.729726	0	0.79086	0	0.760293	0
580	0.331694	0	0.405075	0	0.368384	0
581	0.398033	-0.0165847	0.578678	0	0.488355	-0.00829235
582	0.0663388	0	0.0771571	0	0.0717479	0
583	0.0663388	0	0.0964464	0	0.0813926	0
584	0.215601	0	0.212182	0	0.213892	0
585	0.0663388	0	0	0	0.0331694	0
586	0.215601	0	0.327918	0	0.271759	0
587	0.497541	0	0.308628	0	0.403085	0
588	0.597049	0	0.655835	0	0.626442	0
589	0.56388	0	0.829439	0	0.696659	0
590	0.514125	0	0.443653	0	0.478889	0
591	0.149262	0	0.173604	0	0.161433	0
592	1.87407	0	2.31471	0	2.09439	0
593	0.995082	0	1.21522	0	1.10515	0
594	0.0331694	0	0.0964464	0	0.0648079	0
595	0.978497	0	1.09949	0	1.03899	0
596	1.52579	0	2.12182	0	1.82381	0
597	0.912158	0	0.983753	0	0.947956	0
598	0.348279	0	0.424364	0	0.386321	0
599	0.945327	0	0.945175	0	0.945251	0
600	0.447787	0	0.347207	0	0.397497	0
601	0.132678	0	0.0771571	0	0.104917	0
602	0.215601	0	0.192893	0	0.204247	0
603	0.0331694	0	0.0385786	0	0.035874	0
604	0.298524	0	0.694414	0	0.496469	0
605	0.447787	0	0.675125	0	0.561456	0
606	2.03992	0	2.17969	0	2.1098	0
607	0.315109	0	0.135025	0	0.225067	0
608	1.39311	0	1.77461	0	1.58386	0
609	0.978497	0	1.0802	0	1.02935	0
610	0.331694	0	0.289339	0	0.310517	0
611	1.22727	0	1.40812	0	1.31769	0
612	0.315109	0	0.327918	0	0.321513	0
613	1.16093	0	1.2538	0	1.20737	0
614	1.69164	0	2.29542	0	1.99353	0
615	1.29361	0	1.56243	0	1.42802	0
616	0.663388	0	0.675125	0	0.669256	0
617	0.480956	0	0.5401	0	0.510528	0
618	0.0165847	0	0.0192893	0	0.017937	0
619	0.0331694	0	0.250761	0	0.141965	0
620	0.116093	0	0.154314	0	0.135204	0
621	0.0165847	0	0.0964464	0	0.0565155	0
622	0.0663388	0	0.0964464	0	0.0813926	0
623	0.464371	0	0.212182	-0.0192893	0.338277	-0.00964464
624	0.0497541	0	0.0385786	0	0.0441663	0
625	0.199016	0	0.327918	0	0.263467	0
626	0.0829235	0	0.135025	0	0.108974	0
627	0.464371	0	0.906596	0	0.685484	0
628	0.447787	0	0.636546	0	0.542166	0
629	0.928743	0	1.54314	0	1.23594	0
630	0.679972	0	1.06091	0	0.870441	0
631	0.646803	0	0.732993	-0.0192893	0.689898	-0.00964464
632	0.331694	0	0.366496	0	0.349095	0
633	0.28194	0	0.27005	-0.0192893	0.275995	-0.00964464
634	2.93549	-0.0165847	2.91268	0	2.92409	-0.00829235
635	0.480956	0	0.578678	0	0.529817	0
636	0.24877	0	0.443653	0	0.346212	0
637	0.364863	0	0.424364	0	0.394614	0
638	0.116093	0	0.0385786	0	0.0773357	0
639	0.298524	0	0.192893	0	0.245709	0
640	0.0663388	0	0	0	0.0331694	0
641	1.59213	0	1.13807	-0.0192893	1.3651	-0.00964464
642	0.431202	0	0.405075	0	0.418138	0
643	0.24877	0	0.212182	0	0.230476	0
644	1.55896	0	1.21522	0	1.38709	0
645	1.01167	0	1.21522	-0.0192893	1.11345	-0.00964464
646	1.34336	0	1.19594	0	1.26965	0
647	0.298524	0	0.327918	0	0.313221	0
648	0.28194	0	0.173604	0	0.227772	0
649	0.149262	0	0.231471	0	0.190367	0
650	0.149262	0	0.135025	0	0.142144	0
651	0.215601	0	0.0964464	0	0.156024	0
652	0.497541	0	0.462943	0	0.480242	0
653	0.215601	0	0.231471	0	0.223536	0
654	1.21068	0	1.2538	0	1.23224	0
655	0.961912	0	1.35025	0	1.15608	0
656	0.331694	0	0.5401	0	0.435897	0
657	0.729726	0	0.887307	0	0.808517	0
658	1.45945	0	1.17665	0	1.31805	0
659	1.09459	0	1.60101	0	1.3478	0
660	1.27702	0	1.58172	0	1.42937	0
661	0.199016	0	0.385786	0	0.292401	0
662	0.381448	0	0.173604	0	0.277526	0
663	0.331694	0	0.327918	0	0.329806	0
664	0.679972	0	0.771571	0	0.725772	0
665	0.28194	0	0.578678	0	0.430309	0
666	0	0	0.0192893	0	0.00964464	0
667	0.116093	0	0.250761	0	0.183427	0
668	1.1941	0	1.02233	0	1.10821	0
669	0.215601	0	0.289339	0	0.25247	0
670	0.431202	0	0.405075	0	0.418138	0
671	0.132678	0	0.173604	0	0.153141	0
672	1.65847	0	1.67817	-0.0192893	1.66832	-0.00964464
673	0.132678	0	0.115736	0	0.124207	0
674	3.39986	0	3.08628	0	3.24307	0
675	0.149262	0	0.154314	0	0.151788	0
676	0.53071	0	0.212182	0	0.371446	0
677	1.34336	0	1.4467	0	1.39503	0
678	0.265355	0	0.250761	0	0.258058	0
679	1.67505	0	2.08324	0	1.87915	0
680	1.57555	0	2.1604	0	1.86797	0
681	0.613634	0	0.829439	0	0.721536	0
682	0.331694	0	0.366496	0	0.349095	0
683	0.182432	0	0.192893	0	0.187662	0
684	0.232186	0	0.405075	0	0.31863	0
685	0.364863	0	0.366496	0	0.36568	0
686	0.348279	0	0.327918	0	0.338098	0
687	0.0331694	0	0.0385786	0	0.035874	0
688	0.315109	0	0.405075	0	0.360092	0
689	0.116093	0	0.0771571	0	0.096625	0
690	0.0165847	0	0.0192893	0	0.017937	0
691	0.28194	0	0.154314	0	0.218127	0
692	0.298524	0	0.482232	0	0.390378	0
693	0.298524	0	0.636546	0	0.467535	0
694	0.364863	0	0.308628	0	0.336746	0
695	0.28194	0	0.0771571	0	0.179548	0
696	0.0829235	0	0.0771571	0	0.0800403	0
697	0.497541	-0.0331694	0.443653	0	0.470597	-0.0165847
698	1.09459	0	1.4467	0	1.27064	0
699	1.04484	0	1.0802	0	1.06252	0
700	0.215601	0	0.347207	0	0.281404	0
701	2.91891	0	2.56547	0	2.74219	0
702	1.72481	0	1.92893	0	1.82687	0
703	2.80281	0	2.41116	0	2.60699	0
704	0.331694	0	0.366496	0	0.349095	0
705	0.995082	-0.0165847	1.15736	0	1.07622	-0.00829235
706	0.199016	0	0.231471	0	0.215244	0
707	0.431202	0	0.366496	0	0.398849	0
708	0.497541	0	0.501521	0	0.499531	0
709	0.0497541	0	0.0771571	0	0.0634556	0
710	0.398033	0	0.327918	0	0.362975	0
711	1.22727	0	1.42741	0	1.32734	0
712	0.480956	-0.0165847	0.675125	0	0.57804	-0.00829235
713	0.995082	0	0.945175	0	0.970128	0
714	0.679972	0	1.17665	0	0.928309	0
715	2.23893	0	2.35329	-0.0192893	2.29611	-0.00964464
716	0.232186	0	0.308628	0	0.270407	0
717	0.829235	0	0.964464	0	0.896849	0
718	2.91891	0	3.89643	0	3.40767	0
719	0.928743	0	0.848728	0	0.888736	0
720	0.497541	0	0.405075	0	0.451308	0
721	1.54238	0	1.48527	0	1.51383	0
722	0.0663388	0	0.0578678	0	0.0621033	0
723	0.132678	0	0.173604	0	0.153141	0
724	0.0497541	0	0.0964464	0	0.0731002	0
725	0.0497541	0	0.0578678	0	0.053811	0
726	0	0	0.0385786	0	0.0192893	0
727	0	0	0	0	0	0
728	0.0829235	0	0.0578678	0	0.0703956	0
729	0.0497541	0	0.0578678	0	0.053811	0
730	0.149262	0	0.135025	0	0.142144	0
731	0.265355	0	0.135025	0	0.20019	0
732	0.81265	0	0.829439	0	0.821044	0
733	0.497541	0	0.559389	0	0.528465	0
734	0.696557	0	0.520811	0	0.608684	0
735	0.28194	0	0.482232	0	0.382086	0
736	0.398033	0	0.231471	0	0.314752	0
737	0.845819	0	1.13807	0	0.991943	0
738	0.895573	0	0.848728	0	0.872151	0
739	0.132678	0	0.0771571	0	0.104917	0
740	0.182432	0	0.212182	0	0.197307	0
741	0.132678	0	0.289339	0	0.211008	0
742	0.961912	0	0.887307	0	0.924609	0
743	0.199016	0	0.231471	0	0.215244	0
744	0.348279	0	0.559389	0	0.453834	0
745	0.182432	0	0.0385786	0	0.110505	0
746	0.56388	0	0.732993	0	0.648436	0
747	0.348279	0	0.578678	0	0.463478	0
748	0.431202	0	0.347207	0	0.389205	0
749	0.829235	0	0.578678	0	0.703956	0
750	0.961912	0	1.04162	0	1.00177	0
751	1.29361	0	1.7939	0	1.54375	0
752	0.514125	0	0.462943	0	0.488534	0
753	1.37653	0	1.21522	0	1.29588	0
754	0.116093	0	0.154314	0	0.135204	0
755	0.182432	0	0.135025	0	0.158728	0
756	1.07801	0	0.925885	0	1.00195	0
757	0.0331694	0	0.0192893	0	0.0262293	0
758	0.182432	0	0.192893	0	0.187662	0
759	0.149262	0	0.0578678	0	0.103565	0
760	0.116093	0	0.327918	0	0.222005	0
761	0.431202	0	0.308628	0	0.369915	0
762	0.165847	0	0.327918	0	0.246882	0
763	0.514125	0	1.0802	0	0.797163	0
764	0.0497541	0	0.0578678	0	0.053811	0
765	1.11117	0	1.09949	0	1.10533	0
766	0.215601	0	0.0964464	0	0.156024	0
767	0.232186	0	0.173604	0	0.202895	0
768	0.597049	0	0.482232	0	0.53964	0
769	0.165847	0	0.192893	0	0.17937	0
770	0.182432	0	0.0578678	0	0.12015	0
771	0.0663388	0	0.0385786	0	0.0524587	0
772	0.0663388	0	0.0578678	0	0.0621033	0
773	0.414617	0	0.462943	0	0.43878	0
774	0.0829235	0	0.0771571	0	0.0800403	0
775	0.497541	0	0.347207	0	0.422374	0
776	1.11117	0	1.52385	0	1.31751	0
777	0.431202	0	0.347207	0	0.389205	0
778	1.21068	0	1.21522	0	1.21295	0
779	0.961912	0	1.09949	0	1.0307	0
780	1.42628	0	1.2538	0	1.34004	0
781	1.44287	0	1.63959	0	1.54123	0
782	0.497541	0	1.0802	0	0.78887	0
783	0.331694	0	0.443653	0	0.387674	0
784	0.265355	0	0.308628	0	0.286992	0
785	0.0331694	0	0.0578678	0	0.0455186	0
786	0	0	0.0192893	0	0.00964464	0
787	1.31019	0	1.06091	0	1.18555	0
788	0.165847	0	0.135025	0	0.150436	0
789	0.199016	0	0.27005	0	0.234533	0
790	0.547295	0	0.597968	0	0.572631	0
791	0.149262	0	0.0578678	0	0.103565	0
792	0.0497541	0	0.0578678	0	0.053811	0
793	0.215601	0	0.192893	0	0.204247	0
794	1.02825	0	0.732993	0	0.880622	0
795	0.199016	0	0.173604	0	0.18631	0
796	2.52087	0	2.89339	0	2.70713	0
797	0.713142	0	1.09949	0	0.906315	0
798	0.24877	0	0.289339	0	0.269055	0
799	0.663388	0	0.829439	0	0.746413	0
800	2.15601	0	1.9868	0	2.0714	0
801	0.597049	0	0.752282	0	0.674665	0
802	0.613634	0	0.713703	0	0.663668	0
803	1.50921	0	1.87106	0	1.69013	0
804	4.59396	0	4.26293	0	4.42845	0
805	0.149262	0	0.0385786	0	0.0939204	0
806	0.215601	0	0.27005	0	0.242825	0
807	0.447787	0	0.675125	0	0.561456	0
808	0.265355	0	0.192893	0	0.229124	0
809	0.56388	0	0.308628	0	0.436254	0
810	0.298524	0	0.173604	0	0.236064	0
811	0.0829235	0	0.0771571	0	0.0800403	0
812	0.132678	0	0.212182	0	0.17243	0
813	0.182432	0	0.0578678	0	0.12015	0
814	1.95699	0	2.00608	0	1.98154	0
815	0.978497	0	0.848728	0	0.913613	0
816	2.4877	0	3.08628	0	2.78699	0
817	0.331694	0	0.135025	0	0.233359	0
818	0.0165847	0	0.0578678	0	0.0372263	0
819	0.132678	0	0.135025	0	0.133851	0
820	0.580464	0	0.713703	0	0.647084	0
821	0.0829235	0	0.192893	0	0.137908	0
822	0.0497541	0	0.0578678	0	0.053811	0
823	0.0663388	0	0.154314	0	0.110327	0
824	0.165847	0	0.366496	0	0.266172	0
825	0.116093	0	0.173604	0	0.144848	0
826	0.0995082	0	0.173604	0	0.136556	0
827	0.116093	0	0.192893	0	0.154493	0
828	0.149262	0	0.0578678	0	0.103565	0
829	0.298524	0	0.154314	0	0.226419	0
830	0.348279	0	0.192893	0	0.270586	0
831	0.199016	0	0.0964464	0	0.147731	0
832	2.25552	0	2.54618	0	2.40085	0
833	0.0663388	0	0.231471	0	0.148905	0
834	0.116093	0	0.0578678	0	0.0869803	0
835	0.0331694	0	0.0385786	0	0.035874	0
836	0.182432	0	0.308628	0	0.24553	0
837	0.348279	0	0.366496	0	0.357387	0
838	0.696557	0	1.21522	0	0.955891	0
839	0.315109	0	0.443653	0	0.379381	0
840	0.24877	0	0.250761	0	0.249766	0
841	0.116093	0	0.0771571	0	0.096625	0
842	0.0995082	0	0.135025	0	0.117267	0
843	0.0829235	0	0.0578678	0	0.0703956	0
844	0.0497541	0	0.0385786	0	0.0441663	0
845	0.24877	0	0.462943	0	0.355857	0
846	0.28194	0	0.27005	0	0.275995	0
847	0.182432	0	0.115736	0	0.149084	0
848	0.0165847	0	0.0192893	0	0.017937	0
849	0.0497541	0	0.0192893	-0.0192893	0.0345217	-0.00964464
850	0.199016	0	0.154314	0	0.176665	0
851	0.298524	0	0.424364	0	0.361444	0
852	0.646803	0	0.694414	0	0.670609	0
853	0.116093	0	0.212182	0	0.164137	0
854	0.348279	0	0.366496	0	0.357387	0
855	0.24877	0	0.173604	0	0.211187	0
856	0.364863	0	0.366496	0	0.36568	0
857	0.28194	0	0.366496	0	0.324218	0
858	0.116093	0	0.135025	0	0.125559	0
859	0.497541	0	0.694414	0	0.595977	0
860	0.0995082	0	0.0192893	0	0.0593987	0
861	0.215601	0	0.250761	0	0.233181	0
862	0.132678	0	0.115736	0	0.124207	0
863	0.232186	0	0.308628	0	0.270407	0
864	0.116093	0	0.231471	0	0.173782	0
865	0.0829235	0	0.135025	0	0.108974	0
866	0	0	0	0	0	0
867	0.232186	0	0.0964464	0	0.164316	0
868	0.215601	0	0.212182	0	0.213892	0
869	0.480956	0	0.405075	0	0.443015	0
870	0.0663388	0	0.0385786	0	0.0524587	0
871	0.447787	0	0.636546	0	0.542166	0
872	0.663388	0	0.694414	0	0.678901	0
873	0	0	0.0578678	0	0.0289339	0
874	2.12284	0	2.17969	-0.0192893	2.15126	-0.00964464
875	0.464371	0	0.27005	0	0.367211	0
876	0.28194	0	0.231471	0	0.256706	0
877	0.597049	0	1.00304	0	0.800046	0
878	1.16093	0	1.36954	0	1.26523	0
879	0.0497541	0	0.212182	0	0.130968	0
880	0.514125	-0.0331694	0.501521	-0.0192893	0.507823	-0.0262293
881	0.0663388	0	0.212182	0	0.13926	0
882	0.696557	0	0.925885	0	0.811221	0
883	0.165847	0	0.0578678	0	0.111857	0
884	0.364863	0	0.405075	0	0.384969	0
885	0.912158	0	1.13807	0	1.02511	0
886	0.431202	0	0.327918	0	0.37956	0
887	0.315109	0	0.327918	0	0.321513	0
888	0.132678	0	0.0964464	0	0.114562	0
889	1.72481	0	1.75532	0	1.74007	0
890	0.24877	0	0.192893	0	0.220832	0
891	0.81265	0	1.06091	0	0.93678	0
892	4.07983	0	5.15024	0	4.61504	0
893	0.0497541	0	0.0578678	0	0.053811	0
894	0.0331694	0	0	0	0.0165847	0
895	1.14434	0	0.81015	0	0.977247	0
896	0.0829235	0	0.173604	0	0.128263	0
897	0.0497541	0	0.0192893	0	0.0345217	0
898	0.0829235	0	0.0771571	0	0.0800403	0
899	0.265355	0	0.192893	0	0.229124	0
900	0.0497541	0	0.0964464	0	0.0731002	0
901	0.149262	0	0.212182	0	0.180722	0
902	0.232186	0	0.231471	0	0.231829	0
903	0.165847	-0.0165847	0.0578678	0	0.111857	-0.00829235
904	0.215601	0	0.250761	0	0.233181	0
905	0	0	0	0	0	0
906	0.0331694	0	0.0578678	0	0.0455186	0
907	0.182432	0	0.173604	0	0.178018	0
908	0.447787	0	0.347207	0	0.397497	0
909	0.298524	0	0.347207	0	0.322866	0
910	0.0663388	0	0.0192893	0	0.042814	0
911	0.0995082	0	0.0578678	0	0.078688	0
912	0	0	0.0771571	0	0.0385786	0
913	0.0165847	0	0.0771571	0	0.0468709	0
914	0.116093	0	0.0771571	0	0.096625	0
915	0.348279	-0.0165847	0.675125	0	0.511702	-0.00829235
916	0.315109	0	0.154314	0	0.234712	0
917	0.0497541	0	0.0771571	0	0.0634556	0
918	0.0663388	0	0.0578678	0	0.0621033	0
919	0.132678	0	0.154314	0	0.143496	0
920	0.132678	0	0.154314	0	0.143496	0
921	0.0663388	0	0.115736	0	0.0910372	0
922	0.0995082	0	0.0964464	0	0.0979773	0
923	0.0663388	0	0.0385786	0	0.0524587	0
924	0.0165847	0	0.0578678	0	0.0372263	0
925	0.0663388	0	0.115736	0	0.0910372	0
926	0.165847	0	0.115736	0	0.140791	0
927	0.0165847	0	0.0385786	0	0.0275816	0
928	0.182432	0	0.231471	0	0.206951	0
929	0.132678	0	0.115736	0	0.124207	0
930	0.165847	0	0.5401	0	0.352973	0
931	0.265355	0	0.405075	0	0.335215	0
932	1.69164	0	2.00608	0	1.84886	0
933	0.28194	0	0.289339	0	0.285639	0
934	0.116093	0	0.250761	0	0.183427	0
935	0.182432	0	0.0964464	0	0.139439	0
936	0.0165847	0	0.0192893	0	0.017937	0
937	0.348279	0	0.250761	0	0.29952	0
938	1.01167	0	0.945175	0	0.97842	0
939	0.331694	0	0.559389	0	0.445541	0
940	0.116093	0	0.135025	0	0.125559	0
941	0.0165847	0	0.0385786	0	0.0275816	0
942	1.22727	0	1.48527	0	1.35627	0
943	0.132678	0	0.154314	0	0.143496	0
944	0.265355	0	0.212182	0	0.238769	0
945	0.0497541	0	0.192893	0	0.121323	0
946	0.165847	0	0.115736	0	0.140791	0
947	0.215601	0	0.135025	0	0.175313	0
948	0.447787	0	0.250761	0	0.349274	0
949	0.298524	0	0.27005	0	0.284287	0
950	0.116093	0	0.0771571	0	0.096625	0
951	0.613634	0	0.636546	0	0.62509	0
952	0.132678	0	0.192893	0	0.162785	0
953	3.23402	-0.0165847	3.58781	0	3.41091	-0.00829235
954	1.90724	-0.0165847	1.6203	0	1.76377	-0.00829235
955	5.10809	0	4.84161	0	4.97485	0
956	0.28194	0	0.327918	0	0.304929	0
957	0	0	0.0385786	0	0.0192893	0
958	0.132678	0	0.135025	0	0.133851	0
959	0	0	0.0578678	0	0.0289339	0
960	0.0663388	0	0	0	0.0331694	0
961	0	0	0	0	0	0
962	0.132678	0	0.115736	0	0.124207	0
963	0.0165847	0	0.0578678	0	0.0372263	0
964	0.149262	0	0.0578678	0	0.103565	0
965	0.232186	0	0.135025	0	0.183605	0
966	0.0995082	0	0.0578678	0	0.078688	0
967	0.24877	0	0.154314	0	0.201542	0
968	0.215601	0	0.173604	0	0.194602	0
969	0	0	0.0385786	0	0.0192893	0
970	0.0829235	0	0	0	0.0414617	0
971	0.0829235	0	0.0192893	0	0.0511064	0
972	0.398033	0	0.154314	0	0.276173	0
973	0.0995082	0	0.0192893	0	0.0593987	0
974	0	0	0	0	0	0
975	0.215601	0	0.0385786	0	0.12709	0
976	0	0	0	0	0	0
977	0.0165847	0	0	0	0.00829235	0
978	0.0331694	0	0.0192893	0	0.0262293	0
979	0.0497541	0	0.0578678	0	0.053811	0
980	0.0331694	0	0	0	0.0165847	0
981	0	0	0	0	0	0
982	0.0165847	0	0	0	0.00829235	0
983	0	0	0.0192893	0	0.00964464	0
984	0	0	0	0	0	0
985	0.0165847	0	0	0	0.00829235	0
986	0.0165847	0	0	0	0.00829235	0
987	0	0	0	0	0	0
988	0	0	0	0	0	0
989	0	0	0	0	0	0
990	0	0	0	0	0	0
991	0.0165847	0	0.0192893	0	0.017937	0
992	0.0165847	0	0	0	0.00829235	0
993	0	0	0	0	0	0
994	0	0	0	0	0	0
995	0	0	0.0192893	0	0.00964464	0
996	0	0	0	0	0	0
997	0	0	0	0	0	0
998	0	0	0	0	0	0
999	0.0331694	0	0	0	0.0165847	0
1000	0.0165847	0	0	0	0.00829235	0
1001	0	0	0	0	0	0
1002	0.0663388	0	0.0385786	0	0.0524587	0
1003	0	0	0	0	0	0
1004	0.0165847	0	0	0	0.00829235	0
1005	0.0165847	0	0	0	0.00829235	0
1006	0.0165847	0	0	0	0.00829235	0
1007	0	0	0	0	0	0
1008	0.0165847	0	0	0	0.00829235	0
1009	0.0165847	0	0	0	0.00829235	0
1010	0	0	0	0	0	0
1011	0	0	0	0	0	0
1012	0	0	0	0	0	0
1013	0	0	0	0	0	0
1014	0	0	0	0	0	0
1015	0	0	0	0	0	0
1016	0	0	0	0	0	0
1017	0	0	0	0	0	0
1018	0	0	0.0192893	0	0.00964464	0
1019	0	0	0	0	0	0
1020	0	0	0	0	0	0
1021	0	0	0	0	0	0
1022	0	0	0	0	0	0
1023	0	0	0	0	0	0
1024	0	0	0	0	0	0
1025	0	0	0	0	0	0
1026	0	0	0	0	0	0
1027	0	0	0	0	0	0
1028	0	0	0	0	0	0
1029	0	0	0	0	0	0
1030	0	0	0	0	0	0
1031	0	0	0	0	0	0
1032	0	0	0	0	0	0
1033	0	0	0	0	0	0
1034	0	0	0	0	0	0
1035	0	0	0	0	0	0
1036	0	0	0	0	0	0
1037	0	0	0	0	0	0
1038	0	0	0	0	0	0
1039	0	0	0	0	0	0
1040	0	0	0	0	0	0
1041	0	0	0	0	0	0
1042	0	0	0	0	0	0
1043	0	0	0	0	0	0
1044	0	0	0	0	0	0
1045	0	0	0	0	0	0
1046	0	0	0	0	0	0
1047	0	0	0	0	0	0
1048	0	0	0	0	0	0
1049	0	0	0	0	0	0
1050	0	0	0	0	0	0
1051	0	0	0	0	0	0
1052	0	0	0	0	0	0
1053	0	0	0.0192893	0	0.00964464	0
1054	0	0	0	0	0	0
1055	0	0	0	0	0	0
1056	0	0	0	0	0	0
1057	0	0	0	0	0	0
1058	0	0	0	0	0	0
1059	0	0	0	0	0	0
1060	0	0	0	0	0	0
1061	0	0	0	0	0	0
1062	0	0	0	0	0	0
1063	0	0	0	0	0	0
1064	0	0	0	0	0	0
1065	0.0165847	0	0	0	0.00829235	0
1066	0	0	0	0	0	0
1067	0	0	0.0192893	0	0.00964464	0
1068	0	0	0	0	0	0
1069	0	-0.0165847	0	0	0	-0.00829235
1070	0	0	0	0	0	0
1071	0	0	0	0	0	0
1072	0	0	0	0	0	0
1073	0	0	0	0	0	0
1074	0	0	0	0	0	0
1075	0	0	0	0	0	0
1076	0	0	0	0	0	0
1077	0	0	0	0	0	0
1078	0	0	0	0	0	0
1079	0	0	0	0	0	0
1080	0	0	0	0	0	0
1081	0	0	0	0	0	0
1082	0	0	0	0	0	0
1083	0	0	0	0	0	0
1084	0	0	0	0	0	0
1085	0	0	0	0	0	0
1086	0	0	0	0	0	0
1087	0	0	0	0	0	0
1088	0	0	0	0	0	0
1089	0	0	0	0	0	0
1090	0	0	0	0	0	0
1091	0	0	0	0	0	0
1092	0	0	0	0	0	0
1093	0	0	0	0	0	0
1094	0	0	0	0	0	0
1095	0	-0.0165847	0	-0.0578678	0	-0.0372263
1096	0	0	0	0	0	0
1097	0	-0.0165847	0	0	0	-0.00829235
1098	0	0	0	0	0	0
1099	0	0	0	0	0	0
1100	0	-0.0165847	0	0	0	-0.00829235
1101	0	0	0	0	0	0
1102	0	-0.0497541	0	-0.0578678	0	-0.053811
1103	0	-0.0165847	0	0	0	-0.00829235
1104	0.0165847	-0.0829235	0	-0.0578678	0.00829235	-0.0703956
1105	0	-0.381448	0	-0.0964464	0	-0.238947
1106	0	-0.165847	0	-0.135025	0	-0.150436
1107	0	-0.0829235	0	-0.0192893	0	-0.0511064
1108	0	-0.0331694	0	-0.0385786	0	-0.035874
1109	0	-0.315109	0	-0.173604	0	-0.244356
1110	0	0	0	-0.0192893	0	-0.00964464
1111	0	-0.132678	0	-0.0771571	0	-0.104917
1112	0	-0.132678	0	-0.0964464	0	-0.114562
1113	0	-0.165847	0	-0.0771571	0	-0.121502
1114	0	-0.0497541	0	-0.0771571	0	-0.0634556
1115	0	-1.04484	0	-0.597968	0	-0.821402
1116	0	-0.0663388	0	0	0	-0.0331694
1117	0	-0.165847	0	-0.0578678	0	-0.111857
1118	0	-0.0497541	0	-0.0578678	0	-0.053811
1119	0	-0.497541	0	-0.115736	0	-0.306638
1120	0	-0.331694	0	-0.135025	0	-0.233359
1121	0	0	0	0	0	0
1122	0	-0.0829235	0	0	0	-0.0414617
1123	0	-0.132678	0	-0.0964464	0	-0.114562
1124	0	-0.0165847	0	0	0	-0.00829235
1125	0	0	0	0	0	0
1126	0	-0.165847	0	-0.154314	0	-0.160081
1127	0	-0.28194	0	-0.327918	0	-0.304929
1128	0	-0.0165847	0	0	0	-0.00829235
1129	0	-1.17751	0	-0.424364	0	-0.800939
1130	0	-0.0331694	0	0	0	-0.0165847
1131	0	-0.199016	0	-0.0385786	0	-0.118797
1132	0	-0.0497541	0	-0.0771571	0	-0.0634556
1133	0	-0.0165847	0	0	0	-0.00829235
1134	0	-0.0497541	0	-0.0578678	0	-0.053811
1135	0	-0.0331694	0	0	0	-0.0165847
1136	0	-0.0331694	0	0	0	-0.0165847
1137	0	-0.0829235	0	-0.0385786	0	-0.060751
1138	0	0	0	0	0	0
1139	0	0	0	-0.0192893	0	-0.00964464
1140	0	-0.0497541	0	0	0	-0.024877
1141	0	-0.0995082	0	0	0	-0.0497541
1142	0	-0.0995082	0	0	0	-0.0497541
1143	0	-0.0497541	0	-0.0192893	0	-0.0345217
1144	0	-0.215601	0	0	0	-0.107801
1145	0	-0.0331694	0	0	0	-0.0165847
1146	0	-0.0165847	0	0	0	-0.00829235
1147	0	0	0	-0.0192893	0	-0.00964464
1148	0	-0.0663388	0	-0.0771571	0	-0.0717479
1149	0	-0.0497541	0	0	0	-0.024877
1150	0	0	0	-0.0192893	0	-0.00964464
1151	0	-0.116093	0	-0.0964464	0	-0.10627
1152	0	-0.0165847	0	0	0	-0.00829235
1153	0	-0.199016	0	-0.0578678	0	-0.128442
1154	0	-0.0663388	0	-0.0192893	0	-0.042814
1155	0	-0.0497541	0	-0.0192893	0	-0.0345217
1156	0	-0.0829235	0	0	0	-0.0414617
1157	0	-0.0663388	0	0	0	-0.0331694
1158	0	-0.0995082	0	-0.0964464	0	-0.0979773
1159	0	-0.199016	0	-0.0385786	0	-0.118797
1160	0	-0.0165847	0	0	0	-0.00829235
1161	0	-0.149262	0	-0.0771571	0	-0.11321
1162	0	-0.0995082	0	-0.0771571	0	-0.0883326
1163	0	-1.79115	0	-0.983753	0	-1.38745
1164	0	-2.32186	0	-1.40812	0	-1.86499
1165	0	-0.497541	0	-0.27005	0	-0.383795
1166	0	-0.597049	0	-0.327918	0	-0.462483
1167	0	-0.447787	0	-0.154314	0	-0.30105
1168	0	-0.381448	0	-0.250761	0	-0.316104
1169	0	-0.696557	0	-0.135025	0	-0.415791
1170	0	-0.132678	0	-0.0385786	0	-0.085628
1171	0	-0.0995082	0	-0.115736	0	-0.107622
1172	0	-0.381448	0	-0.0578678	0	-0.219658
1173	0	-0.0331694	0	-0.0192893	0	-0.0262293
1174	0	-0.0165847	0	-0.0385786	0	-0.0275816
1175	0	-0.0165847	0	0	0	-0.00829235
1176	0	-0.53071	0	-0.231471	0	-0.381091
1177	0	-0.232186	0	-0.192893	0	-0.212539
1178	0	-0.0165847	0	0	0	-0.00829235
1179	0	-0.0663388	0	0	0	-0.0331694
1180	0	-0.165847	0	-0.154314	0	-0.160081
1181	0	-0.0663388	0	-0.0385786	0	-0.0524587
1182	0	-0.0663388	0	0	0	-0.0331694
1183	0	-0.0995082	0	-0.0578678	0	-0.078688
1184	0	0	0	-0.0192893	0	-0.00964464
1185	0	0	0	0	0	0
1186	0	-0.0165847	0	0	0	-0.00829235
1187	0	0	0	0	0	0
1188	0	-0.0829235	0	-0.0385786	0	-0.060751
1189	0	-0.0663388	0	-0.0192893	0	-0.042814
1190	0	-0.0331694	0	0	0	-0.0165847
1191	0	-0.0165847	0	0	0	-0.00829235
1192	0	-0.0165847	0	0	0	-0.00829235
1193	0	-0.480956	0	-0.27005	0	-0.375503
1194	0	-0.116093	0	0	0	-0.0580464
1195	0	-0.0331694	0	-0.0578678	0	-0.0455186
1196	0	-0.0331694	0	0	0	-0.0165847
1197	0	-0.0497541	0	-0.0385786	0	-0.0441663
1198	0	-0.0497541	0	0	0	-0.024877
1199	0	0	0	0	0	0
1200	0	-0.0995082	0	-0.0771571	0	-0.0883326
1201	0	0	0	0	0	0
1202	0	-0.0331694	0	0	0	-0.0165847
1203	0	-0.0331694	0.0192893	-0.0192893	0.00964464	-0.0262293
1204	0	-0.0331694	0	-0.0385786	0	-0.035874
1205	0	-0.0331694	0	-0.0192893	0	-0.0262293
1206	0	-0.24877	0	-0.154314	0	-0.201542
1207	0	-0.646803	0	-0.192893	0	-0.419848
1208	0	-0.414617	0	-0.405075	0	-0.409846
1209	0	-0.0331694	0	-0.0192893	0	-0.0262293
1210	0	-0.0331694	0	-0.0192893	0	-0.0262293
1211	0	0	0	0	0	0
1212	0	-0.0331694	0	-0.0385786	0	-0.035874
1213	0	-0.0331694	0	-0.0578678	0	-0.0455186
1214	0	-0.0829235	0	-0.0385786	0	-0.060751
1215	0	-0.0331694	0	0	0	-0.0165847
1216	0	-0.0165847	0	0	0	-0.00829235
1217	0	-0.182432	0	-0.135025	0	-0.158728
1218	0	-0.0995082	0	0	0	-0.0497541
1219	0	-0.298524	0	-0.135025	0	-0.216775
1220	0	0	0	-0.0192893	0	-0.00964464
1221	0	-0.0331694	0	-0.0385786	0	-0.035874
1222	0	-0.0995082	0	0	0	-0.0497541
1223	0	-0.0165847	0	0	0	-0.00829235
1224	0	-0.0497541	0	-0.0385786	0	-0.0441663
1225	0.0165847	-0.0165847	0	-0.0192893	0.00829235	-0.017937
1226	0	-0.116093	0	-0.115736	0	-0.115914
1227	0	-0.24877	0	-0.192893	0	-0.220832
1228	0	-0.0995082	0	-0.0578678	0	-0.078688
1229	0	-0.0497541	0	-0.0385786	0	-0.0441663
1230	0	-0.0663388	0	0	0	-0.0331694
1231	0	-0.0829235	0	-0.154314	0	-0.118619
1232	0	-0.199016	0	-0.0964464	0	-0.147731
1233	0	-0.28194	0	-0.347207	0	-0.314573
1234	0	-0.0995082	0	-0.173604	0	-0.136556
1235	0	-0.56388	0	-0.443653	0	-0.503766
1236	0	-0.132678	0	-0.0578678	0	-0.0952727
1237	0	-0.28194	0	-0.27005	0	-0.275995
1238	0	-0.298524	0	-0.192893	0	-0.245709
1239	0	-0.215601	0	-0.154314	0	-0.184958
1240	0	-0.165847	0	-0.0771571	0	-0.121502
1241	0.0165847	-0.0331694	0	-0.0385786	0.00829235	-0.035874
1242	0	0	0	0	0	0
1243	0	-0.0165847	0	-0.0192893	0	-0.017937
1244	0	-0.0165847	0	-0.0192893	0	-0.017937
1245	0	-0.630218	0.0192893	-0.675125	0.00964464	-0.652672
1246	0	-0.398033	0	-0.732993	0	-0.565513
1247	0	-0.845819	0	-1.06091	0	-0.953365
1248	0	-0.215601	0	-0.115736	0	-0.165668
1249	0	-0.364863	0	-0.154314	0	-0.259589
1250	0	-1.42628	0	-1.58172	0	-1.504
1251	0	-0.0829235	0	-0.212182	0	-0.147553
1252	0	-0.298524	0	-0.347207	0	-0.322866
1253	0	-0.315109	0	-0.231471	0	-0.27329
1254	0	-0.182432	0	-0.327918	0	-0.255175
1255	0	-0.0829235	0	-0.0964464	0	-0.0896849
1256	0	-0.265355	0	-0.135025	0	-0.20019
1257	0	-0.597049	0	-0.366496	0	-0.481773
1258	0	-1.11117	0	-1.46599	0	-1.28858
1259	0	-0.232186	0	-0.154314	0	-0.19325
1260	0	-0.364863	0	-0.462943	0	-0.413903
1261	0	-0.0331694	0	-0.0964464	0	-0.0648079
1262	0	-0.0663388	0	-0.0385786	0	-0.0524587
1263	0.0165847	-0.0663388	0	-0.115736	0.00829235	-0.0910372
1264	0	-0.182432	0	-0.0192893	0	-0.10086
1265	0	-0.182432	0	-0.27005	0	-0.226241
1266	0	0	0	-0.0964464	0	-0.0482232
1267	0	-0.0995082	0	-0.308628	0	-0.204068
1268	0	-2.57063	0	-2.27613	0	-2.42338
1269	0	-0.199016	0	-0.212182	0	-0.205599
1270	0	-0.928743	0	-0.752282	0	-0.840512
1271	0	-0.56388	0	-0.732993	0	-0.648436
1272	0	-0.215601	0	-0.135025	0	-0.175313
1273	0	-0.0995082	0	-0.0771571	0	-0.0883326
1274	0	-0.132678	0	-0.0578678	0	-0.0952727
1275	0	0	0	0	0	0
1276	0	-0.961912	0	-0.771571	0	-0.866742
1277	0	-0.165847	0	-0.115736	0	-0.140791
1278	0	-0.0663388	0	-0.0578678	0	-0.0621033
1279	0	-0.0165847	0	-0.0385786	0	-0.0275816
1280	0	-0.0165847	0	-0.0964464	0	-0.0565155
1281	0	-0.0663388	0	0	0	-0.0331694
1282	0	-0.24877	0	-0.0385786	0	-0.143674
1283	0	-0.0331694	0	-0.0964464	0	-0.0648079
1284	0	-0.0995082	0	-0.0578678	0	-0.078688
1285	0	-0.149262	0	-0.135025	0	-0.142144
1286	0	-0.0331694	0	-0.0385786	0	-0.035874
1287	0	-0.165847	0	-0.0964464	0	-0.131147
1288	0	-0.0165847	0	0	0	-0.00829235
1289	0	-0.24877	0	-0.250761	0	-0.249766
1290	0	-0.232186	0	-0.27005	0	-0.251118
1291	0	-0.713142	0	-0.675125	0	-0.694133
1292	0	-0.232186	0	-0.405075	0	-0.31863
1293	0.0165847	-0.182432	0	-0.250761	0.00829235	-0.216596
1294	0	-0.0995082	0	-0.135025	0	-0.117267
1295	0	-0.0331694	0	-0.0385786	0	-0.035874
1296	0	-0.165847	0	-0.135025	0	-0.150436
1297	0	-0.0165847	0	-0.173604	0	-0.0950941
1298	0	-0.28194	0	-0.327918	0	-0.304929
1299	0	-0.0165847	0	-0.0385786	0	-0.0275816
1300	0	-0.0165847	0	-0.0964464	0	-0.0565155
1301	0	-0.232186	0	-0.0771571	0	-0.154671
1302	0	-0.182432	0	-0.212182	0	-0.197307
1303	0	-0.746311	0	-0.964464	0	-0.855388
1304	0	-0.514125	0	-0.694414	0	-0.60427
1305	0	-0.480956	0	-0.636546	0	-0.558751
1306	0	-0.597049	0	-0.520811	0	-0.55893
1307	0	-0.447787	0	-0.231471	0	-0.339629
1308	0	-0.165847	0	-0.212182	0	-0.189014
1309	0	-0.0829235	0	-0.135025	0	-0.108974
1310	0	-0.0331694	0	-0.0385786	0	-0.035874
1311	0	-0.0829235	0	-0.308628	0	-0.195776
1312	0	-0.0995082	0	-0.192893	0	-0.1462
1313	0	-0.0165847	0	-0.115736	0	-0.0661602
1314	0	-0.232186	0	-0.289339	0	-0.260762
1315	0	-0.364863	0	-0.385786	0	-0.375324
1316	0	-0.132678	0	-0.385786	0	-0.259232
1317	0	-0.149262	0	-0.154314	0	-0.151788
1318	0	-0.961912	0	-0.887307	0	-0.924609
1319	0	-0.0829235	0	-0.135025	0	-0.108974
1320	0	-0.0497541	0	-0.0192893	0	-0.0345217
1321	0	-0.24877	0	-0.327918	0	-0.288344
1322	0	0	0	-0.0192893	0	-0.00964464
1323	0	-0.215601	0	-0.0578678	0	-0.136734
1324	0	-0.331694	0	-0.250761	0	-0.291227
1325	0	-0.0829235	0	-0.192893	0	-0.137908
1326	0	-0.182432	0	-0.192893	0	-0.187662
1327	0	-3.61546	0	-3.12486	0	-3.37016
1328	0	0	0	-0.0385786	0	-0.0192893
1329	0	-0.182432	0	-0.250761	0	-0.216596
1330	0	-0.149262	0	-0.0964464	0	-0.122854
1331	0	-0.0663388	0	0	0	-0.0331694
1332	0	-0.116093	0	-0.173604	0	-0.144848
1333	0	-0.215601	0	-0.192893	0	-0.204247
1334	0.0165847	-0.182432	0	-0.0964464	0.00829235	-0.139439
1335	0	-0.431202	0.0192893	-0.5401	0.00964464	-0.485651
1336	0.0165847	-0.0497541	0	-0.212182	0.00829235	-0.130968
1337	0	-0.132678	0	-0.212182	0	-0.17243
1338	0	-0.497541	0	-0.79086	0	-0.644201
1339	0	-0.24877	0	-0.482232	0	-0.365501
1340	0	-0.132678	0	-0.0578678	0	-0.0952727
1341	0	-0.232186	0	-0.0964464	0	-0.164316
1342	0	-0.132678	0	-0.0578678	0	-0.0952727
1343	0	-0.199016	0	-0.385786	0	-0.292401
1344	0	-0.165847	0	-0.192893	0	-0.17937
1345	0	-0.414617	0	-0.597968	0	-0.506292
1346	0	-0.116093	0	-0.154314	0	-0.135204
1347	0	-0.0995082	0	-0.289339	0	-0.194424
1348	0	-0.199016	0	-0.154314	0	-0.176665
1349	0	-0.0497541	0	-0.0385786	0	-0.0441663
1350	0	-0.0829235	0	-0.0771571	0	-0.0800403
1351	0	-0.0165847	0	-0.0192893	0	-0.017937
1352	0	-0.0995082	0	-0.0192893	0	-0.0593987
1353	0	-0.0663388	0	-0.135025	0	-0.100682
1354	0	-1.47604	0	-1.33096	0	-1.4035
1355	0	-0.0331694	0	-0.0578678	0	-0.0455186
1356	0.0165847	-0.232186	0	-0.347207	0.00829235	-0.289696
1357	0	-0.630218	0	-0.578678	0	-0.604448
1358	0	-0.0829235	0	-0.0578678	0	-0.0703956
1359	0	-0.514125	0	-0.752282	0	-0.633204
1360	0	-2.53746	0	-2.43045	0	-2.48395
1361	0	-0.0331694	0	0	0	-0.0165847
1362	0	-0.28194	0	-0.366496	0	-0.324218
1363	0	-0.762896	0	-0.887307	0	-0.825101
1364	0	-0.24877	0	-0.231471	0	-0.240121
1365	0	-0.447787	0	-0.289339	0	-0.368563
1366	0	-0.199016	0	-0.212182	0	-0.205599
1367	0	-0.0663388	0	-0.0964464	0	-0.0813926
1368	0	-0.0497541	0	-0.0964464	0	-0.0731002
1369	0	-0.0663388	0	-0.0964464	0	-0.0813926
1370	0	-0.265355	0	-0.0192893	0	-0.142322
1371	0	-0.878989	0	-0.713703	0	-0.796346
1372	0	-0.0995082	0	-0.0192893	0	-0.0593987
1373	0	-0.215601	0	-0.385786	0	-0.300693
1374	0	-0.597049	0	-0.617257	0	-0.607153
1375	0	-0.298524	0	-0.443653	0	-0.371089
1376	0.0165847	-0.597049	0	-0.520811	0.00829235	-0.55893
1377	0	-0.315109	0	-0.308628	0	-0.311869
1378	0	-0.165847	0	-0.0385786	0	-0.102213
1379	0	-0.132678	0	-0.308628	0	-0.220653
1380	0	-0.265355	0	-0.231471	0	-0.248413
1381	0	-0.28194	0	-0.424364	0	-0.353152
1382	0	-0.315109	0	-0.385786	0	-0.350447
1383	0	-0.0995082	0	-0.192893	0	-0.1462
1384	0	-0.232186	0	-0.192893	0	-0.212539
1385	0	-0.0663388	0	-0.173604	0	-0.119971
1386	0	-1.02825	0	-1.04162	0	-1.03494
1387	0	-0.912158	0	-0.964464	0	-0.938311
1388	0	-0.0829235	0	-0.192893	0	-0.137908
1389	0	-0.24877	0	-0.347207	0	-0.297989
1390	0	-0.165847	0	-0.0192893	0	-0.0925681
1391	0	-0.762896	0	-0.694414	0	-0.728655
1392	0	-0.0331694	0	0	0	-0.0165847
1393	0	-0.0165847	0	0	0	-0.00829235
1394	0	-0.199016	0	-0.173604	0	-0.18631
1395	0	-0.315109	0	-0.27005	0	-0.29258
1396	0	-0.348279	0	-0.250761	0	-0.29952
1397	0.0165847	-0.381448	0	-0.482232	0.00829235	-0.43184
1398	0	-0.0995082	0	-0.0385786	0	-0.0690434
1399	0	-0.0995082	0	-0.115736	0	-0.107622
1400	0	-0.215601	0	-0.173604	0	-0.194602
1401	0	-0.0331694	0	-0.0192893	0	-0.0262293
1402	0	-0.165847	0	-0.366496	0	-0.266172
1403	0	-0.165847	0	-0.192893	0	-0.17937
1404	0	-0.0497541	0	-0.0385786	0	-0.0441663
1405	0	-0.0663388	0	0	0	-0.0331694
1406	0	-0.132678	0	-0.0385786	0	-0.085628
1407	0	-0.447787	0	-0.250761	0	-0.349274
1408	0	-0.28194	0	-0.173604	0	-0.227772
1409	0	-0.447787	0.0192893	-0.308628	0.00964464	-0.378208
1410	0	-0.0331694	0	-0.0192893	0	-0.0262293
1411	0	-0.0165847	0	-0.0192893	0	-0.017937
1412	0	-0.0497541	0	-0.0385786	0	-0.0441663
1413	0	-0.398033	0	-0.327918	0	-0.362975
1414	0	-0.0497541	0	-0.0192893	0	-0.0345217
1415	0	-0.0331694	0	-0.135025	0	-0.0840972
1416	0	-0.0331694	0	-0.0771571	0	-0.0551633
1417	0	-0.0165847	0	-0.0192893	0	-0.017937
1418	0	-0.24877	0	-0.173604	0	-0.211187
1419	0	-1.24385	0	-1.17665	0	-1.21025
1420	0	-0.24877	0	-0.385786	0	-0.317278
1421	0	-0.0663388	0	-0.135025	0	-0.100682
1422	0	-0.978497	0	-0.848728	0	-0.913613
1423	0	-0.779481	0	-0.655835	0	-0.717658
1424	0	-0.132678	0	-0.212182	0	-0.17243
1425	0	-0.0663388	0	-0.250761	0	-0.15855
1426	0	-0.165847	0	-0.0964464	0	-0.131147
1427	0	-0.0829235	0	-0.0964464	0	-0.0896849
1428	0	-0.0165847	0	-0.0385786	0	-0.0275816
1429	0	-0.0497541	0	-0.154314	0	-0.102034
1430	0	-0.116093	0	-0.135025	0	-0.125559
1431	0	-0.0497541	0	-0.0385786	0	-0.0441663
1432	0	-0.364863	0	-0.462943	0	-0.413903
1433	0	-0.779481	0	-0.983753	0	-0.881617
1434	0	-1.02825	0	-1.40812	0	-1.21818
1435	0	-1.8409	0	-2.37258	0	-2.10674
1436	0	-0.381448	0	-0.424364	0	-0.402906
1437	0	-0.0663388	0	-0.173604	0	-0.119971
1438	0	-0.447787	0	-0.308628	0	-0.378208
1439	0	-0.414617	0	-0.27005	0	-0.342334
1440	0	-0.381448	0	-0.27005	0	-0.325749
1441	0	-0.132678	0	-0.27005	0	-0.201364
1442	0	-0.0663388	0	-0.192893	0	-0.129616
1443	0	-0.232186	0	-0.462943	0	-0.347564
1444	0	-0.0995082	0	-0.115736	0	-0.107622
1445	0	-0.0995082	0	-0.115736	0	-0.107622
1446	0	-0.116093	0	-0.0192893	0	-0.0676911
1447	0	-0.116093	0	-0.212182	0	-0.164137
1448	0	-0.28194	0.0192893	-0.192893	0.00964464	-0.237416
1449	0	-0.232186	0	-0.308628	0	-0.270407
1450	0	-0.0165847	0	-0.0192893	0	-0.017937
1451	0	-0.149262	0	-0.212182	0	-0.180722
1452	0	-0.0497541	0	-0.0385786	0	-0.0441663
1453	0	-0.298524	0	-0.231471	0	-0.264998
1454	0.0165847	-0.613634	0	-0.5401	0.00829235	-0.576867
1455	0	-0.232186	0	-0.327918	0	-0.280052
1456	0	-0.0331694	0	-0.0385786	0	-0.035874
1457	0	-0.232186	0	-0.366496	0	-0.299341
1458	0	-0.265355	0	-0.327918	0	-0.296636
1459	0	-0.182432	0	-0.154314	0	-0.168373
1460	0	-0.149262	0	-0.212182	0	-0.180722
1461	0	-0.165847	0	-0.231471	0	-0.198659
1462	0	-0.149262	0	-0.0964464	0	-0.122854
1463	0	-0.497541	0	-0.501521	0	-0.499531
1464	0.0165847	-0.232186	0	-0.154314	0.00829235	-0.19325
1465	0	-0.0663388	0	-0.154314	0	-0.110327
1466	0	-0.315109	0	-0.559389	0	-0.437249
1467	0	-0.331694	0	-0.79086	0	-0.561277
1468	0	-0.928743	0	-0.964464	0	-0.946603
1469	0	-0.613634	0	-0.617257	0	-0.615445
1470	0	-0.298524	0	-0.559389	0	-0.428957
1471	0	-0.116093	0	-0.173604	0	-0.144848
1472	0	-0.53071	0	-0.501521	0	-0.516116
1473	0	-0.149262	0	-0.231471	0	-0.190367
1474	0	-0.480956	0	-0.443653	0	-0.462305
1475	0	-0.679972	0	-0.713703	0	-0.696838
1476	0	-0.165847	0	-0.366496	0	-0.266172
1477	0	-0.431202	0	-0.771571	0	-0.601387
1478	0	-0.199016	0	-0.212182	0	-0.205599
1479	0	-0.0663388	0	-0.115736	0	-0.0910372
1480	0	-0.0497541	0	-0.0964464	0	-0.0731002
1481	0	-0.0331694	0	-0.173604	0	-0.103386
1482	0	-0.331694	0	-0.5401	0	-0.435897
1483	0	-1.02825	0	-1.00304	0	-1.01565
1484	0	-0.116093	0	-0.135025	0	-0.125559
1485	0	-0.116093	0	-0.0385786	0	-0.0773357
1486	0	-0.348279	0	-0.308628	0	-0.328454
1487	0	-0.398033	0	-0.462943	0	-0.430488
1488	0	-0.265355	0	-0.212182	0	-0.238769
1489	0	-0.165847	0	-0.424364	0	-0.295106
1490	0.0165847	-1.22727	0	-1.36954	0.00829235	-1.2984
1491	0	-0.116093	0	-0.231471	0	-0.173782
1492	0	-0.0663388	0	-0.212182	0	-0.13926
1493	0	-0.298524	0	-0.308628	0	-0.303576
1494	0	-0.381448	0	-0.597968	0	-0.489708
1495	0	-0.315109	0	-0.27005	0	-0.29258
1496	0	-0.630218	0	-0.482232	0	-0.556225
1497	0.0165847	-0.0165847	0	-0.0192893	0.00829235	-0.017937
1498	0	-0.149262	0	-0.154314	0	-0.151788
1499	0	-0.149262	0	-0.115736	0	-0.132499
1500	0	-0.132678	0	-0.212182	0	-0.17243
1501	0	-0.24877	0	-0.424364	0	-0.336567
1502	0	-0.298524	0	-0.308628	0	-0.303576
1503	0	-0.414617	0	-0.366496	0	-0.390557
1504	0	-0.315109	0	-0.366496	0	-0.340803
1505	0.0165847	-0.165847	0	-0.192893	0.00829235	-0.17937
1506	0	-0.28194	0.0385786	-0.135025	0.0192893	-0.208482
1507	0.0331694	-0.398033	0	-0.675125	0.0165847	-0.536579
1508	0	-0.232186	0	-0.0964464	0	-0.164316
1509	0	-0.447787	0	-0.192893	0	-0.32034
1510	0	-0.646803	0	-0.81015	0	-0.728476
1511	0	-0.28194	0	-0.327918	0	-0.304929
1512	0	-0.0829235	0	-0.0771571	0	-0.0800403
1513	0	-0.0663388	0	-0.231471	0	-0.148905
1514	0	-0.0497541	0	-0.0771571	0	-0.0634556
1515	0	-0.24877	0.0385786	-0.443653	0.0192893	-0.346212
1516	0	-0.116093	0	-0.135025	0	-0.125559
1517	0.0165847	-0.348279	0	-0.559389	0.00829235	-0.453834
1518	0	-0.514125	0	-0.5401	0	-0.527113
1519	0	-0.0663388	0	-0.0964464	0	-0.0813926
1520	0	-0.364863	0	-0.154314	0	-0.259589
1521	0	-0.514125	0	-0.520811	0	-0.517468
1522	0	-0.0663388	0	-0.135025	0	-0.100682
1523	0	-0.199016	0	-0.212182	0	-0.205599
1524	0	-0.116093	0	-0.0385786	0	-0.0773357
1525	0	-0.0331694	0	-0.0385786	0	-0.035874
1526	0	-0.0829235	0	-0.192893	0	-0.137908
1527	0	-0.215601	0	-0.212182	0	-0.213892
1528	0	-0.215601	0	-0.289339	0	-0.25247
1529	0	-0.116093	0	-0.0771571	0	-0.096625
1530	0	-0.0663388	0	-0.0385786	0	-0.0524587
1531	0	-0.182432	0	-0.231471	0	-0.206951
1532	0	-0.497541	0	-0.597968	0	-0.547754
1533	0	-0.0663388	0	-0.154314	0	-0.110327
1534	0	-0.56388	0	-0.578678	0	-0.571279
1535	0	-0.0829235	0	-0.154314	0	-0.118619
1536	0	-0.0829235	0	-0.0578678	0	-0.0703956
1537	0	-0.497541	0	-0.617257	0	-0.557399
1538	0	-0.0663388	0	-0.135025	0	-0.100682
1539	0	-0.878989	0	-0.964464	0	-0.921726
1540	0	-0.0663388	0	-0.0771571	0	-0.0717479
1541	0	-0.431202	0	-0.443653	0	-0.437428
1542	0	-0.580464	0	-0.385786	0	-0.483125
1543	0	-0.0497541	0	-0.135025	0	-0.0923895
1544	0	0	0.0192893	-0.0771571	0.00964464	-0.0385786
1545	0	-0.215601	0	-0.27005	0	-0.242825
1546	0	-1.52579	0	-1.65888	0	-1.59233
1547	0	-0.348279	0	-0.559389	0	-0.453834
1548	0	-0.149262	0	-0.231471	0	-0.190367
1549	0	-0.165847	0	-0.250761	0	-0.208304
1550	0	-0.0829235	0	-0.192893	0	-0.137908
1551	0	-0.116093	0	-0.154314	0	-0.135204
1552	0	-0.0497541	0	-0.289339	0	-0.169547
1553	0	-0.0663388	0	-0.173604	0	-0.119971
1554	0.0497541	-0.132678	0	-0.0964464	0.024877	-0.114562
1555	0	-0.431202	0	-0.289339	0	-0.360271
1556	0	-0.0165847	0	-0.0385786	0	-0.0275816
1557	0	-0.0331694	0	-0.0771571	0	-0.0551633
1558	0	-0.0165847	0	-0.0771571	0	-0.0468709
1559	0	0	0	-0.0192893	0	-0.00964464
1560	0	-0.0829235	0	-0.0385786	0	-0.060751
1561	0	-0.0165847	0	-0.154314	0	-0.0854495
1562	0	-0.331694	0	-0.424364	0	-0.378029
1563	0	0	0	0	0	0
1564	0	-0.132678	0	-0.212182	0	-0.17243
1565	0	-0.28194	0	-0.462943	0	-0.372441
1566	0	-0.348279	0	-0.443653	0	-0.395966
1567	0	-0.28194	0	-0.385786	0	-0.333863
1568	0	-0.0331694	0	-0.0578678	0	-0.0455186
1569	0	-0.215601	0	-0.27005	0	-0.242825
1570	0	0	0	-0.0385786	0	-0.0192893
1571	0	-0.116093	0	-0.212182	0	-0.164137
1572	0	-0.0331694	0	0	0	-0.0165847
1573	0	-0.0331694	0	-0.0192893	0	-0.0262293
1574	0	-0.0829235	0	0	0	-0.0414617
1575	0	-0.0829235	0	-0.0771571	0	-0.0800403
1576	0	-0.265355	0	-0.327918	0	-0.296636
1577	0	-0.331694	0	-0.231471	0	-0.281583
1578	0	-0.165847	0	-0.250761	0	-0.208304
1579	0	-0.0829235	0	-0.212182	0	-0.147553
1580	0	-0.298524	0	-0.327918	0	-0.313221
1581	0	-0.0663388	0	-0.250761	0	-0.15855
1582	0	-0.679972	0	-0.520811	0	-0.600391
1583	0	-0.132678	0	-0.231471	0	-0.182074
1584	0	0	0	0	0	0
1585	0	-0.0663388	0	-0.0964464	0	-0.0813926
1586	0	-0.0497541	0	-0.0771571	0	-0.0634556
1587	0	-0.480956	0	-0.424364	0	-0.45266
1588	0	-0.232186	0	-0.135025	0	-0.183605
1589	0	-0.331694	0	-0.250761	0	-0.291227
1590	0	-0.0165847	0	-0.0578678	0	-0.0372263
1591	0	0	0	-0.0385786	0	-0.0192893
1592	0	0	0	-0.0192893	0	-0.00964464
1593	0	-0.0331694	0	0	0	-0.0165847
1594	0.0165847	-0.215601	0	-0.135025	0.00829235	-0.175313
1595	0	0	0	0	0	0
1596	0	-0.116093	0	-0.0385786	0	-0.0773357
1597	0	-0.298524	0	-0.308628	0	-0.303576
1598	0	-0.0663388	0	-0.0578678	0	-0.0621033
1599	0	-0.0995082	0	-0.173604	0	-0.136556
1600	0	-0.315109	0	-0.135025	0	-0.225067
1601	0	-0.165847	0	-0.250761	0	-0.208304
1602	0	-0.0497541	0	-0.154314	0	-0.102034
1603	0	-0.116093	0	-0.0771571	0	-0.096625
1604	0	-0.895573	0	-0.983753	0	-0.939663
1605	0	-0.132678	0	-0.135025	0	-0.133851
1606	0	-0.199016	0	-0.424364	0	-0.31169
1607	0	-0.28194	0	-0.154314	0	-0.218127
1608	0	-0.132678	0	-0.308628	0	-0.220653
1609	0	-0.0331694	0	-0.0771571	0	-0.0551633
1610	0	-0.232186	0	-0.27005	0	-0.251118
1611	0	-0.0331694	0	-0.192893	0	-0.113031
1612	0	-0.0165847	0	-0.0578678	0	-0.0372263
1613	0	0	0	0	0	0
1614	0	-0.0829235	0	-0.0578678	0	-0.0703956
1615	0	-0.0331694	0	-0.0578678	0	-0.0455186
1616	0	-0.116093	0	-0.135025	0	-0.125559
1617	0	-0.24877	0	-0.250761	0	-0.249766
1618	0	-0.165847	0	-0.0578678	0	-0.111857
1619	0.0165847	-0.0663388	0	-0.0192893	0.00829235	-0.042814
1620	0	-0.149262	0	-0.0771571	0	-0.11321
1621	0	0	0	-0.0385786	0	-0.0192893
1622	0	-0.0331694	0.0192893	-0.0192893	0.00964464	-0.0262293
1623	0	-0.0497541	0	0	0	-0.024877
1624	0	0	0	-0.0385786	0	-0.0192893
1625	0	-0.0165847	0	-0.0385786	0	-0.0275816
1626	0	0	0	0	0	0
1627	0	-0.215601	0	-0.231471	0	-0.223536
1628	0	-0.0663388	0	0	0	-0.0331694
1629	0	-0.0829235	0	-0.135025	0	-0.108974
1630	0	-0.348279	0	-0.231471	0	-0.289875
1631	0	-0.116093	0	-0.0385786	0	-0.0773357
1632	0	-0.0829235	0	-0.250761	0	-0.166842
1633	0	-0.0165847	0	0	0	-0.00829235
1634	0	-0.165847	0	-0.192893	0	-0.17937
1635	0	-0.0663388	0	-0.0192893	0	-0.042814
1636	0	-0.0165847	0	0	0	-0.00829235
1637	0	-0.0331694	0	-0.0385786	0	-0.035874
1638	0	-0.0497541	0	-0.0771571	0	-0.0634556
1639	0	-0.0663388	0	-0.0771571	0	-0.0717479
1640	0	-0.149262	0	-0.154314	0	-0.151788
1641	0	0	0	0	0	0
1642	0	-0.182432	0	-0.154314	0	-0.168373
1643	0	-0.0829235	0	-0.0771571	0	-0.0800403
1644	0	-0.0995082	0	-0.115736	0	-0.107622
1645	0	-0.215601	0	-0.27005	0	-0.242825
1646	0	-0.0165847	0.0192893	-0.154314	0.00964464	-0.0854495
1647	0	-0.0165847	0	-0.0192893	0	-0.017937
1648	0	0	0	0	0	0
1649	0	-0.0995082	0	-0.0192893	0	-0.0593987
1650	0	-0.0995082	0	-0.0964464	0	-0.0979773
1651	0	-0.0995082	0	-0.0385786	0	-0.0690434
1652	0	-0.0165847	0	-0.0964464	0	-0.0565155
1653	0	-0.0995082	0	-0.115736	0	-0.107622
1654	0	-0.0165847	0	-0.0578678	0	-0.0372263
1655	0	-0.0331694	0	-0.154314	0	-0.0937418
1656	0	-0.232186	0	-0.405075	0	-0.31863
1657	0	-0.0165847	0	-0.154314	0	-0.0854495
1658	0	0	0	0	0	0
1659	0	0	0	-0.0385786	0	-0.0192893
1660	0	-0.132678	0	-0.173604	0	-0.153141
1661	0	-0.0663388	0	-0.0771571	0	-0.0717479
1662	0	-0.0995082	0	-0.0771571	0	-0.0883326
1663	0	0	0	-0.0192893	0	-0.00964464
1664	0	-0.0331694	0	0	0	-0.0165847
1665	0	-0.0829235	0	-0.0192893	0	-0.0511064
1666	0	-0.0331694	0	-0.0964464	0	-0.0648079
1667	0	0	0	-0.0192893	0	-0.00964464
1668	0	-0.0165847	0	-0.0192893	0	-0.017937
1669	0	-0.0995082	0	0	0	-0.0497541
1670	0	-0.0497541	0	-0.154314	0	-0.102034
1671	0	-0.0663388	0	-0.154314	0	-0.110327
1672	0	-0.0995082	0	-0.0964464	0	-0.0979773
1673	0	-0.0663388	0	-0.0385786	0	-0.0524587
1674	0	-0.199016	0	-0.135025	0	-0.167021
1675	0.0165847	-0.232186	0	-0.192893	0.00829235	-0.212539
1676	0	-0.381448	0	-0.192893	0	-0.28717
1677	0	-0.232186	0	-0.135025	0	-0.183605
1678	0	-0.0829235	0	0	0	-0.0414617
1679	0	-0.0663388	0	-0.154314	0	-0.110327
1680	0	-0.0995082	0	-0.115736	0	-0.107622
1681	0	-1.06142	0	-0.829439	0	-0.94543
1682	0	-0.0829235	0	-0.0771571	0	-0.0800403
1683	0	-0.0331694	0	0	0	-0.0165847
1684	0	-0.0331694	0	-0.0385786	0	-0.035874
1685	0	-0.0995082	0	-0.173604	0	-0.136556
1686	0	-0.28194	0	-0.366496	0	-0.324218
1687	0	-0.315109	0	-0.250761	0	-0.282935
1688	0	-0.0497541	0	-0.115736	0	-0.0827449
1689	0	-0.0165847	0	-0.0964464	0	-0.0565155
1690	0	-0.0663388	0	-0.0385786	0	-0.0524587
1691	0.0165847	-0.0829235	0.0192893	-0.0578678	0.017937	-0.0703956
1692	0	0	0	-0.0192893	0	-0.00964464
1693	0	-0.0829235	0.0192893	-0.0192893	0.00964464	-0.0511064
1694	0	-0.0165847	0	0	0	-0.00829235
1695	0	0	0	-0.0192893	0	-0.00964464
1696	0	0	0	0	0	0
1697	0	-0.0165847	0	-0.0192893	0	-0.017937
1698	0	-0.0663388	0	-0.0578678	0	-0.0621033
1699	0	0	0	-0.0192893	0	-0.00964464
1700	0	0	0	0	0	0
1701	0	-0.0165847	0	-0.0192893	0	-0.017937
1702	0	-0.0165847	0	0	0	-0.00829235
1703	0	-0.0497541	0	-0.0964464	0	-0.0731002
1704	0	0	0	-0.0385786	0	-0.0192893
1705	0	-0.0331694	0	-0.0578678	0	-0.0455186
1706	0	-0.0331694	0	-0.0192893	0	-0.0262293
1707	0	-0.0497541	0	-0.0771571	0	-0.0634556
1708	0	-0.0663388	0.0192893	-0.115736	0.00964464	-0.0910372
1709	0	-0.0165847	0	0	0	-0.00829235
1710	0	0	0	0	0	0
1711	0	-0.0165847	0	0	0	-0.00829235
1712	0	0	0.0192893	0	0.00964464	0
1713	0	-0.0331694	0	-0.0192893	0	-0.0262293
1714	0	-0.0165847	0	-0.0385786	0	-0.0275816
1715	0	-0.0497541	0	0	0	-0.024877
1716	0	-0.0995082	0	-0.0385786	0	-0.0690434
1717	0	-0.0663388	0	-0.0385786	0	-0.0524587
1718	0.0331694	-0.0995082	0.0192893	-0.135025	0.0262293	-0.117267
1719	0	0	0	-0.0192893	0	-0.00964464
1720	0	-0.0663388	0	-0.0192893	0	-0.042814
1721	0	-0.0165847	0	-0.0578678	0	-0.0372263
1722	0	-0.0331694	0	0	0	-0.0165847
1723	0	-0.132678	0	-0.0771571	0	-0.104917
1724	0	-0.0497541	0	0	0	-0.024877
1725	0	0	0	0	0	0
1726	0	0	0	-0.0192893	0	-0.00964464
1727	0	0	0	0	0	0
1728	0.0165847	-0.0663388	0	-0.0964464	0.00829235	-0.0813926
1729	0	0	0	-0.0192893	0	-0.00964464
1730	0	-0.0165847	0	0	0	-0.00829235
1731	0	0	0	-0.0385786	0	-0.0192893
1732	0	0	0	0	0	0
1733	0	0	0	0	0	0
1734	0	0	0	-0.0192893	0	-0.00964464
1735	0	-0.0497541	0	0	0	-0.024877
1736	0	-0.0331694	0	-0.0192893	0	-0.0262293
1737	0	-0.0663388	0	-0.0771571	0	-0.0717479
1738	0	0	0	0	0	0
1739	0	-0.132678	0	-0.0385786	0	-0.085628
1740	0	-0.0165847	0	0	0	-0.00829235
1741	0	-0.0331694	0	-0.0771571	0	-0.0551633
1742	0	0	0	-0.0578678	0	-0.0289339
1743	0	-0.0165847	0	0	0	-0.00829235
1744	0	0	0	-0.0385786	0	-0.0192893
1745	0	-0.0165847	0	0	0	-0.00829235
1746	0	-0.0663388	0	-0.0771571	0	-0.0717479
1747	0	0	0	0	0	0
1748	0	-0.0829235	0.0192893	-0.0771571	0.00964464	-0.0800403
1749	0	-0.0165847	0	-0.0771571	0	-0.0468709
1750	0	-0.0331694	0	0	0	-0.0165847
1751	0	-0.0165847	0	0	0	-0.00829235
1752	0	-0.0165847	0	-0.0192893	0	-0.017937
1753	0	-0.0497541	0	-0.0385786	0	-0.0441663
1754	0	-0.0497541	0	-0.0964464	0	-0.0731002
1755	0	-0.116093	0	-0.0578678	0	-0.0869803
1756	0	-0.0165847	0	0	0	-0.00829235
1757	0	0	0	0	0	0
1758	0	-0.132678	0	-0.347207	0	-0.239942
1759	0	-0.0829235	0	-0.0192893	0	-0.0511064
1760	0	-0.0663388	0	-0.173604	0	-0.119971
1761	0	-0.0165847	0	-0.0385786	0	-0.0275816
1762	0	-0.0165847	0	0	0	-0.00829235
1763	0	-0.0331694	0	-0.0385786	0	-0.035874
1764	0	-0.0165847	0	-0.0771571	0	-0.0468709
1765	0	0	0	0	0	0
1766	0	-0.0165847	0	-0.0192893	0	-0.017937
1767	0	-0.0331694	0	0	0	-0.0165847
1768	0	-0.0663388	0	-0.154314	0	-0.110327
1769	0	-0.0995082	0	-0.135025	0	-0.117267
1770	0	-0.348279	0	-0.366496	0	-0.357387
1771	0	0	0	-0.0192893	0	-0.00964464
1772	0	0	0	-0.0578678	0	-0.0289339
1773	0.0165847	-0.0995082	0	-0.0578678	0.00829235	-0.078688
1774	0	-0.0331694	0	-0.0578678	0	-0.0455186
1775	0	-0.0497541	0	-0.0192893	0	-0.0345217
1776	0	-0.0331694	0	-0.0385786	0	-0.035874
1777	0	0	0	-0.0192893	0	-0.00964464
1778	0	-0.0663388	0	-0.192893	0	-0.129616
1779	0	-0.0165847	0	-0.0578678	0	-0.0372263
1780	0	-0.0663388	0	-0.115736	0	-0.0910372
1781	0	-0.0497541	0	-0.0385786	0	-0.0441663
1782	0	-0.149262	0.0192893	-0.135025	0.00964464	-0.142144
1783	0	-0.0165847	0	-0.0192893	0	-0.017937
1784	0	-0.0331694	0	0	0	-0.0165847
1785	0	0	0	-0.173604	0	-0.0868018
1786	0	-0.165847	0	-0.115736	0	-0.140791
1787	0	0	0	-0.0192893	0	-0.00964464
1788	0	-0.0829235	0	-0.0192893	0	-0.0511064
1789	0	0	0	0	0	0
1790	0	0	0	0	0	0
1791	0	0	0	0	0	0
1792	0	-0.116093	0	-0.0385786	0	-0.0773357
1793	0	-0.0497541	0	-0.0964464	0	-0.0731002
1794	0	-0.0497541	0	-0.192893	0	-0.121323
1795	0	-0.132678	0	-0.0578678	0	-0.0952727
1796	0	-0.0165847	0	-0.0964464	0	-0.0565155
1797	0	-0.0497541	0	-0.0385786	0	-0.0441663
1798	0	-0.0995082	0	-0.0385786	0	-0.0690434
1799	0	-0.0829235	0	-0.0192893	0	-0.0511064
1800	0	0	0	-0.0771571	0	-0.0385786
1801	0	0	0.0192893	-0.0578678	0.00964464	-0.0289339
1802	0	-0.0331694	0	0	0	-0.0165847
1803	0	-0.0165847	0	0	0	-0.00829235
1804	0	-0.0165847	0	-0.0192893	0	-0.017937
1805	0	-0.149262	0	-0.231471	0	-0.190367
1806	0	-0.0331694	0	0	0	-0.0165847
1807	0	-0.0331694	0	-0.0771571	0	-0.0551633
1808	0	-0.0165847	0	0	0	-0.00829235
1809	0	0	0	-0.0192893	0	-0.00964464
1810	0	-0.0663388	0	-0.0385786	0	-0.0524587
1811	0	-0.0165847	0	-0.0578678	0	-0.0372263
1812	0	0	0	-0.0385786	0	-0.0192893
1813	0	-0.0165847	0	0	0	-0.00829235
1814	0	0	0	-0.0385786	0	-0.0192893
1815	0	0	0	0	0	0
1816	0	0	0	0	0	0
1817	0	0	0	0	0	0
1818	0	0	0	-0.0192893	0	-0.00964464
1819	0	0	0	0	0	0
1820	0	-0.0165847	0	-0.0192893	0	-0.017937
1821	0	0	0	0	0	0
1822	0	0	0	0	0	0
1823	0	-0.0497541	0	0	0	-0.024877
1824	0	-0.0165847	0	0	0	-0.00829235
1825	0	-0.0497541	0	-0.0385786	0	-0.0441663
1826	0	0	0	0	0	0
1827	0	-0.0165847	0	-0.0578678	0	-0.0372263
1828	0	-0.0829235	0	-0.250761	0	-0.166842
1829	0	0	0	0	0	0
1830	0	-0.0331694	0	-0.0385786	0	-0.035874
1831	0	-0.0165847	0	0	0	-0.00829235
1832	0	-0.116093	0	-0.0192893	0	-0.0676911
1833	0	-0.0165847	0	-0.0385786	0	-0.0275816
1834	0	-0.0331694	0	-0.0385786	0	-0.035874
1835	0	0	0	0	0	0
1836	0	-0.0165847	0	0	0	-0.00829235
1837	0	-0.0165847	0	0	0	-0.00829235
1838	0	0	0	-0.0385786	0	-0.0192893
1839	0	0	0	0	0	0
1840	0	0	0	0	0	0
1841	0	-0.0165847	0	0	0	-0.00829235
1842	0	0	0	0	0	0
1843	0	-0.0331694	0	-0.0192893	0	-0.0262293
1844	0	-0.0165847	0	-0.0192893	0	-0.017937
1845	0	0	0	0	0	0
1846	0	-0.0663388	0	-0.0385786	0	-0.0524587
1847	0	-0.149262	0	-0.0771571	0	-0.11321
1848	0	-0.0165847	0	-0.0385786	0	-0.0275816
1849	0	0	0	0	0	0
1850	0	0	0	0	0	0
1851	0	0	0	0	0	0
1852	0	0	0	-0.0385786	0	-0.0192893
1853	0	-0.0663388	0	0	0	-0.0331694
1854	0	-0.0497541	0	-0.0964464	0	-0.0731002
1855	0	-0.149262	0	-0.154314	0	-0.151788
1856	0	-0.265355	0	-0.405075	0	-0.335215
1857	0	-0.132678	0	-0.0771571	0	-0.104917
1858	0	-0.0331694	0	-0.0771571	0	-0.0551633
1859	0	-0.0331694	0	-0.0192893	0	-0.0262293
1860	0	-0.0165847	0	-0.0385786	0	-0.0275816
1861	0	-0.0331694	0	-0.115736	0	-0.0744525
1862	0	0	0	-0.0192893	0	-0.00964464
1863	0	-0.0497541	0	0	0	-0.024877
1864	0	0	0	0	0	0
1865	0	-0.0331694	0	-0.0192893	0	-0.0262293
1866	0	-0.0165847	0.0192893	-0.0192893	0.00964464	-0.017937
1867	0	-0.0165847	0	0	0	-0.00829235
1868	0	-0.0995082	0	-0.115736	0	-0.107622
1869	0.0165847	-0.613634	0	-0.501521	0.00829235	-0.557577
1870	0	-0.0497541	0	-0.115736	0	-0.0827449
1871	0	-0.0497541	0	-0.0771571	0	-0.0634556
1872	0	-0.165847	0	-0.231471	0	-0.198659
1873	0	-0.0165847	0	-0.0385786	0	-0.0275816
1874	0	-0.0165847	0	0	0	-0.00829235
1875	0	-0.0497541	0	-0.0385786	0	-0.0441663
1876	0	-0.0165847	0	0	0	-0.00829235
1877	0	0	0	0	0	0
1878	0	0	0	0	0	0
1879	0	-0.0331694	0	0	0	-0.0165847
1880	0.0331694	0	0	0	0.0165847	0
1881	0	-0.116093	0	-0.0578678	0	-0.0869803
1882	0	0	0	0	0	0
1883	0	-0.0165847	0	0	0	-0.00829235
1884	0	0	0	0	0	0
1885	0	0	0	0	0	0
1886	0.0165847	0	0	0	0.00829235	0
1887	0	-0.0331694	0	0	0	-0.0165847
1888	0.0165847	-0.0497541	0	-0.0578678	0.00829235	-0.053811
1889	0.0165847	-0.116093	0	-0.135025	0.00829235	-0.125559
1890	0	-0.0165847	0	-0.0192893	0	-0.017937
1891	0	-0.0829235	0	0	0	-0.0414617
1892	0	0	0	0	0	0
1893	0	-0.0497541	0	0	0	-0.024877
1894	0	0	0	-0.0385786	0	-0.0192893
1895	0.0165847	-0.0829235	0.0192893	-0.115736	0.017937	-0.0993296
1896	0	-0.0165847	0	-0.0578678	0	-0.0372263
1897	0	0	0.0192893	-0.0192893	0.00964464	-0.00964464
1898	0	-0.0497541	0	-0.0192893	0	-0.0345217
1899	0	0	0	0	0	0
1900	0	-0.0331694	0	-0.0192893	0	-0.0262293
1901	0	0	0	-0.0192893	0	-0.00964464
1902	0	-0.0165847	0	0	0	-0.00829235
1903	0.0331694	-0.0829235	0	-0.0771571	0.0165847	-0.0800403
1904	0	-0.0165847	0	-0.0192893	0	-0.017937
1905	0	0	0	0	0	0
1906	0	0	0	-0.0192893	0	-0.00964464
1907	0	-0.0497541	0	0	0	-0.024877
1908	0	-0.0497541	0	0	0	-0.024877
1909	0	0	0	0	0	0
1910	0	-0.0165847	0	0	0	-0.00829235
1911	0	-0.0663388	0	-0.0771571	0	-0.0717479
1912	0	0	0.0192893	0	0.00964464	0
1913	0	-0.116093	0	-0.0771571	0	-0.096625
1914	0	0	0	0	0	0
1915	0	0	0	0	0	0
1916	0	0	0	0	0	0
1917	0	-0.0165847	0	0	0	-0.00829235
1918	0	-0.0663388	0	-0.0192893	0	-0.042814
1919	0	-0.0497541	0	-0.0771571	0	-0.0634556
1920	0	0	0	-0.0964464	0	-0.0482232
1921	0	-0.0497541	0	-0.0192893	0	-0.0345217
1922	0	-0.0165847	0	0	0	-0.00829235
1923	0.0165847	-0.0331694	0	0	0.00829235	-0.0165847
1924	0.0165847	0	0	0	0.00829235	0
1925	0.0165847	-0.0165847	0	0	0.00829235	-0.00829235
1926	0	-0.0165847	0	-0.0385786	0	-0.0275816
1927	0	0	0	-0.0385786	0	-0.0192893
1928	0	0	0	0	0	0
1929	0	-0.0497541	0	-0.0192893	0	-0.0345217
1930	0	-0.0497541	0	0	0	-0.024877
1931	0	-0.0829235	0	-0.0192893	0	-0.0511064
1932	0	-0.0331694	0	0	0	-0.0165847
1933	0	0	0	0	0	0
1934	0	-0.0497541	0	0	0	-0.024877
1935	0	-0.132678	0	-0.115736	0	-0.124207
1936	0	-0.0165847	0	0	0	-0.00829235
1937	0	-0.149262	0	-0.115736	0	-0.132499
1938	0	0	0	0	0	0
1939	0	0	0	-0.0578678	0	-0.0289339
1940	0	-0.0165847	0	-0.0385786	0	-0.0275816
1941	0	-0.0663388	0	-0.0771571	0	-0.0717479
1942	0	0	0	-0.0964464	0	-0.0482232
1943	0	-0.0829235	0	-0.0771571	0	-0.0800403
1944	0	-0.646803	0	-0.482232	0	-0.564517
1945	0	-0.0497541	0	0	0	-0.024877
1946	0	-0.0829235	0	-0.0385786	0	-0.060751
1947	0	-0.0331694	0	-0.0385786	0	-0.035874
1948	0.0165847	-0.0829235	0.0192893	-0.0771571	0.017937	-0.0800403
1949	0	0	0	-0.0192893	0	-0.00964464
1950	0	-0.0165847	0	-0.0192893	0	-0.017937
1951	0	-0.0331694	0	-0.0578678	0	-0.0455186
1952	0	-0.0331694	0	0	0	-0.0165847
1953	0	0	0	0	0	0
1954	0.0165847	-0.0165847	0.0192893	0	0.017937	-0.00829235
1955	0	0	0	-0.0192893	0	-0.00964464
1956	0	0	0	0	0	0
1957	0	0	0	0	0	0
1958	0	-0.0165847	0	-0.0192893	0	-0.017937
1959	0	-0.0331694	0	-0.0385786	0	-0.035874
1960	0	-0.0995082	0	0	0	-0.0497541
1961	0	-0.116093	0	-0.0578678	0	-0.0869803
1962	0	-0.149262	0	-0.289339	0	-0.219301
1963	0.0165847	0	0	-0.115736	0.00829235	-0.0578678
1964	0	-0.0829235	0	-0.0385786	0	-0.060751
1965	0	-0.0663388	0.0192893	0	0.00964464	-0.0331694
1966	0	0	0.0192893	-0.0192893	0.00964464	-0.00964464
1967	0	-0.0165847	0	0	0	-0.00829235
1968	0	-0.0165847	0	0	0	-0.00829235
1969	0	-0.0165847	0	0	0	-0.00829235
1970	0	-0.0331694	0	-0.0192893	0	-0.0262293
1971	0	0	0	-0.0192893	0	-0.00964464
1972	0	-0.0165847	0	-0.0385786	0	-0.0275816
1973	0	0	0	0	0	0
1974	0	0	0	0	0	0
1975	0	0	0	-0.0385786	0	-0.0192893
1976	0	0	0	-0.0192893	0	-0.00964464
1977	0	0	0	-0.0192893	0	-0.00964464
1978	0	-0.0165847	0	0	0	-0.00829235
1979	0	0	0	0	0	0
1980	0	0	0	0	0	0
1981	0	-0.0165847	0	-0.0192893	0	-0.017937
1982	0	-0.165847	0	-0.212182	0	-0.189014
1983	0	-0.0165847	0	-0.135025	0	-0.0758048
1984	0	-0.0165847	0	0	0	-0.00829235
1985	0	-0.0331694	0	-0.0192893	0	-0.0262293
1986	0	-0.0497541	0	-0.0192893	0	-0.0345217
1987	0	-0.0331694	0.0192893	-0.0964464	0.00964464	-0.0648079
1988	0	-0.232186	0	-0.135025	0	-0.183605
1989	0	0	0	-0.0192893	0	-0.00964464
1990	0	-0.0165847	0	-0.0192893	0	-0.017937
1991	0	0	0	0	0	0
1992	0	-0.0165847	0	0	0	-0.00829235
1993	0	-0.0497541	0	0	0	-0.024877
1994	0	0	0	0	0	0
1995	0	0	0.0192893	0	0.00964464	0
1996	0	-0.0331694	0.0578678	0	0.0289339	-0.0165847
1997	0.0165847	-0.0165847	0	0	0.00829235	-0.00829235
1998	0	0	0	0	0	0
1999	0.0331694	-0.0331694	0	0	0.0165847	-0.0165847
[truncated: 782 more rows]

## Sheet: S-IL 30dpi (IL)
position	fwd 1	rev 1	fwd 2	rev 2	rightward	leftward
1	0	0	0.0272615	0	0.0136307	0
2	0	0	0	0	0	0
3	0	0	0	0	0	0
4	0.017416	0	0	0	0.00870801	0
5	0	0	0	0	0	0
6	0	0	0	0	0	0
7	0	0	0	0	0	0
8	0	0	0	0	0	0
9	0	0	0	0	0	0
10	0	0	0	0	0	0
11	0	0	0	0	0	0
12	0	0	0	0	0	0
13	0	0	0	0	0	0
14	0	0	0	0	0	0
15	0	0	0	0	0	0
16	0	0	0	0	0	0
17	0	-0.017416	0	0	0	-0.00870801
18	0	0	0	0	0	0
19	0	0	0	0	0	0
20	0	0	0	0	0	0
21	0	0	0	0	0	0
22	0	0	0	0	0	0
23	0	0	0	0	0	0
24	0	0	0	0	0	0
25	0	0	0	0	0	0
26	0	0	0	0	0	0
27	0	0	0	0	0	0
28	0	0	0	0	0	0
29	0	0	0	0	0	0
30	0	0	0	0	0	0
31	0	0	0	0	0	0
32	0	0	0	0	0	0
33	0	0	0	0	0	0
34	0	0	0	0	0	0
35	0	0	0	0	0	0
36	0	0	0	0	0	0
37	0.034832	0	0.0136307	0	0.0242314	0
38	0	0	0	0	0	0
39	0	0	0	0	0	0
40	0	0	0	0	0	0
41	0	0	0	0	0	0
42	0	0	0.0136307	0	0.00681537	0
43	0	0	0	0	0	0
44	0.017416	0	0.0272615	0	0.0223387	0
45	0	0	0	0	0	0
46	0	0	0	0	0	0
47	0	0	0	0	0	0
48	0	0	0	0	0	0
49	0	0	0.0136307	0	0.00681537	0
50	0.034832	0	0.0136307	0	0.0242314	0
51	0	0	0	0	0	0
52	0	0	0	0	0	0
53	0	0	0	0	0	0
54	0	0	0.0136307	0	0.00681537	0
55	0	0	0.0272615	-0.0272615	0.0136307	-0.0136307
56	0	0	0	0	0	0
57	0	0	0	0	0	0
58	0	0	0	0	0	0
59	0	0	0	0	0	0
60	0	0	0	0	0	0
61	0	0	0	0	0	0
62	0	0	0	0	0	0
63	0	0	0	-0.0136307	0	-0.00681537
64	0	0	0	0	0	0
65	0	0	0	0	0	0
66	0	0	0	0	0	0
67	0.017416	0	0	0	0.00870801	0
68	0	0	0	0	0	0
69	0	0	0.0136307	0	0.00681537	0
70	0	0	0	0	0	0
71	0	0	0	0	0	0
72	0	0	0	0	0	0
73	0	0	0	0	0	0
74	0	0	0.0136307	0	0.00681537	0
75	0	0	0.0136307	0	0.00681537	0
76	0.017416	0	0	-0.0272615	0.00870801	-0.0136307
77	0.017416	-0.017416	0	0	0.00870801	-0.00870801
78	0	0	0.0136307	0	0.00681537	0
79	0	0	0	0	0	0
80	0	0	0.0136307	0	0.00681537	0
81	0	0	0	0	0	0
82	0.034832	0	0.0136307	-0.0136307	0.0242314	-0.00681537
83	0	0	0	0	0	0
84	0	0	0	0	0	0
85	0	0	0	0	0	0
86	0	0	0	0	0	0
87	0.017416	0	0	0	0.00870801	0
88	0	0	0	0	0	0
89	0	0	0	0	0	0
90	0	0	0	0	0	0
91	0	0	0	0	0	0
92	0.017416	0	0	0	0.00870801	0
93	0	0	0	0	0	0
94	0	0	0	0	0	0
95	0	0	0.0136307	0	0.00681537	0
96	0	0	0	0	0	0
97	0	-0.017416	0	0	0	-0.00870801
98	0	0	0	0	0	0
99	0	0	0	0	0	0
100	0.017416	0	0.0136307	0	0.0155234	0
101	0	0	0	0	0	0
102	0	0	0	0	0	0
103	0	0	0	0	0	0
104	0	0	0	0	0	0
105	0	0	0	0	0	0
106	0.017416	0	0	0	0.00870801	0
107	0	0	0	0	0	0
108	0	0	0	0	0	0
109	0	0	0	0	0	0
110	0	0	0	0	0	0
111	0	0	0	0	0	0
112	0	0	0	0	0	0
113	0	0	0	0	0	0
114	0.017416	0	0	0	0.00870801	0
115	0	0	0	0	0	0
116	0.017416	0	0	0	0.00870801	0
117	0	0	0	0	0	0
118	0	0	0.0272615	0	0.0136307	0
119	0	0	0.0136307	0	0.00681537	0
120	0	0	0	0	0	0
121	0	0	0.0136307	0	0.00681537	0
122	0	0	0	0	0	0
123	0.034832	0	0	0	0.017416	0
124	0	0	0	0	0	0
125	0	0	0	0	0	0
126	0	0	0	0	0	0
127	0	0	0	0	0	0
128	0	0	0.0136307	0	0.00681537	0
129	0.034832	0	0.0272615	0	0.0310467	0
130	0.034832	0	0	0	0.017416	0
131	0.034832	0	0	-0.0272615	0.017416	-0.0136307
132	0	0	0	0	0	0
133	0.017416	0	0.0817844	0	0.0496002	0
134	0	0	0.0136307	0	0.00681537	0
135	0	0	0.0136307	0	0.00681537	0
136	0	0	0.0136307	0	0.00681537	0
137	0.017416	0	0.0272615	0	0.0223387	0
138	0	0	0	0	0	0
139	0	0	0	0	0	0
140	0.017416	0	0.0136307	0	0.0155234	0
141	0	0	0.0136307	0	0.00681537	0
142	0.017416	0	0.0136307	-0.0136307	0.0155234	-0.00681537
143	0	0	0.0136307	0	0.00681537	0
144	0	0	0.0272615	0	0.0136307	0
145	0.017416	0	0	0	0.00870801	0
146	0.017416	0	0	0	0.00870801	0
147	0	0	0.0272615	0	0.0136307	0
148	0	0	0.0136307	0	0.00681537	0
149	0.017416	0	0.0136307	0	0.0155234	0
150	0.104496	0	0.136307	0	0.120402	0
151	0.017416	0	0.0136307	0	0.0155234	0
152	0.34832	0	0.36803	-0.0136307	0.358175	-0.00681537
153	0.0870801	0	0.19083	0	0.138955	0
154	0.243824	0	0.436183	0	0.340004	0
155	0.17416	0	0.1772	0	0.17568	0
156	3.4832	0	4.55266	0	4.01793	0
157	2.02026	0	1.70384	0	1.86205	0
158	2.56015	0	2.82156	0	2.69086	0
159	0.853385	0	0.831475	0	0.84243	0
160	2.29891	0	3.09418	0	2.69655	0
161	2.177	0	3.05328	0	2.61514	0
162	3.97085	0	4.96159	0	4.46622	0
163	1.09721	0	1.2404	0	1.1688	0
164	0.139328	0	0.258984	0	0.199156	0
165	0.383152	0	0.613383	0	0.498268	0
166	0.69664	0	0.586122	0	0.641381	0
167	0.296072	0	0.1772	0	0.236636	0
168	0.4354	0	0.681537	0	0.558468	0
169	0.644392	0	0.845105	0	0.744749	0
170	0.278656	0	0.627014	0	0.452835	0
171	0.487648	0	0.845105	0	0.666377	0
172	0.034832	0	0.0408922	0	0.0378621	0
173	2.00284	0	1.44486	0	1.72385	0
174	0.417984	0	0.490706	0	0.454345	0
175	2.02026	0	1.64932	0	1.83479	0
176	0.69664	0	0.586122	0	0.641381	0
177	1.39328	0	1.25403	0	1.32365	0
178	1.42811	0	1.93556	0	1.68184	0
179	0.208992	0	0.381661	0	0.295326	0
180	0.069664	0	0.109046	0	0.089355	0
181	0.034832	0	0.0136307	0	0.0242314	0
182	0.034832	0	0.0954151	0	0.0651236	0
183	0.034832	0	0.136307	0	0.0855697	0
184	0.870801	0	1.10409	0	0.987445	0
185	0.400568	0	0.272615	0	0.336591	0
186	0.470232	0	0.831475	0	0.650854	0
187	1.06238	0	1.51301	0	1.28769	0
188	0.296072	0	0.245353	0	0.270713	0
189	0.905633	0	1.29492	0	1.10028	0
190	1.16687	0	1.30855	0	1.23771	0
191	0.104496	0	0.0817844	0	0.0931402	0
192	0.783721	0	0.899628	0	0.841674	0
193	0.26124	0	0.1772	0	0.21922	0
194	0.296072	0	0.627014	0	0.461543	0
195	0.121912	0	0.136307	0	0.12911	0
196	0.226408	0	0.136307	0	0.181358	0
197	1.98543	0	2.04461	0	2.01502	0
198	0.69664	0	0.667906	0	0.682273	0
199	0.487648	0	0.517968	0	0.502808	0
200	1.02754	0	0.763321	0	0.895433	0
201	0.766305	0	0.790583	0	0.778444	0
202	0.104496	0	0.122677	0	0.113586	0
203	0.313488	0	0.231722	0	0.272605	0
204	1.51519	0	1.60843	-0.0272615	1.56181	-0.0136307
205	0.121912	0	0.0545229	0	0.0882175	0
206	0.574728	0	0.490706	0	0.532717	0
207	0.592144	0	0.954151	0	0.773148	0
208	0.330904	0	0.327138	0	0.329021	0
209	0.313488	0	0.19083	0	0.252159	0
210	0.121912	0	0.231722	0	0.176817	0
211	0.766305	0	0.463445	0	0.614875	0
212	0.034832	0	0.0408922	0	0.0378621	0
213	0.505064	0	0.504337	0	0.504701	0
214	0.905633	0	0.763321	0	0.834477	0
215	0.365736	0	0.463445	0	0.414591	0
216	0.069664	0	0.163569	0	0.116616	0
217	0.940465	0	1.39033	0	1.1654	0
218	1.48036	0	1.78563	0	1.63299	0
219	0.644392	0	0.531599	0	0.587996	0
220	0.278656	0	0.36803	0	0.323343	0
221	4.00568	0	4.42999	0	4.21784	0
222	1.09721	0	1.25403	0	1.17562	0
223	0.104496	0	0.272615	0	0.188555	0
224	2.02026	0	1.9083	0	1.96428	0
225	0.60956	0	0.654275	0	0.631918	0
226	1.06238	0	0.981413	0	1.02189	0
227	1.14946	0	0.776952	0	0.963204	0
228	0.505064	0	0.74969	0	0.627377	0
229	1.81127	0	1.7311	0	1.77118	0
230	0.052248	0	0.0408922	0	0.0465701	0
231	0.069664	0	0.136307	0	0.102986	0
232	1.34103	0	1.5539	0	1.44747	0
233	1.48036	0	2.28996	-0.0272615	1.88516	-0.0136307
234	2.45566	0	3.16233	-0.0272615	2.80899	-0.0136307
235	0.766305	0	1.07683	0	0.921566	0
236	0.4354	0	0.817844	0	0.626622	0
237	0.208992	0	0.1772	0	0.193096	0
238	0.139328	0	0.204461	0	0.171895	0
239	1.18429	0	1.2404	0	1.21234	0
240	0.208992	0	0.204461	0	0.206727	0
241	1.65452	0	2.23544	-0.0272615	1.94498	-0.0136307
242	0.4354	0	0.55886	0	0.49713	0
243	3.22196	0	3.73482	-0.0272615	3.47839	-0.0136307
244	0.69664	0	0.681537	0	0.689089	0
245	0.557312	0	0.490706	-0.0272615	0.524009	-0.0136307
246	0.905633	0	1.29492	0	1.10028	0
247	0.417984	0	0.299876	0	0.35893	0
248	0.69664	0	1.18587	0	0.941257	0
249	0.139328	0	0.381661	0	0.260494	0
250	2.47307	0	3.35316	0	2.91312	0
251	0.60956	0	1.10409	0	0.856825	0
252	0.121912	0	0.136307	0	0.12911	0
253	0.34832	0	0.327138	0	0.337729	0
254	3.65736	0	5.91574	0	4.78655	0
255	1.27137	0	1.33581	0	1.30359	0
256	0.313488	0	0.245353	0	0.279421	0
257	1.55003	0	1.44486	0	1.49744	0
258	0.69664	0	0.708798	0	0.702719	0
259	0.748889	0	0.640644	0	0.694766	0
260	0.539896	0	0.73606	0	0.637978	0
261	0.452816	0	0.504337	0	0.478577	0
262	0.714056	0	0.504337	0	0.609197	0
263	0.557312	0	0.92689	0	0.742101	0
264	1.55003	0	1.74473	0	1.64738	0
265	0.870801	0	1.29492	0	1.08286	0
266	3.86635	0	4.25279	0	4.05957	0
267	1.09721	0	0.845105	0	0.971157	0
268	0.574728	0	0.654275	0	0.614502	0
269	0.17416	0	0.408922	0	0.291541	0
270	0.52248	0	0.531599	0	0.527039	0
271	0.34832	0	0.436183	0	0.392252	0
272	0.017416	0	0.0136307	0	0.0155234	0
273	0.296072	0	0.1772	0	0.236636	0
274	0.400568	0	0.490706	0	0.445637	0
275	0.60956	0	0.599752	0	0.604656	0
276	0.313488	0	0.422553	0	0.36802	0
277	0.0870801	0	0.0817844	0	0.0844322	0
278	0.278656	0	0.436183	0	0.35742	0
279	0.017416	0	0.0136307	0	0.0155234	0
280	4.30175	0	4.11648	0	4.20912	0
281	0.34832	0	0.218092	0	0.283206	0
282	1.11462	0	0.940521	0	1.02757	0
283	0.644392	0	0.74969	0	0.697041	0
284	1.8461	0	2.49442	0	2.17026	0
285	11.2159	0	11.3953	0	11.3056	0
286	0.017416	0	0.0272615	0	0.0223387	0
287	0.592144	0	0.408922	0	0.500533	0
288	0.052248	0	0.149938	0	0.101093	0
289	1.2017	0	0.995044	0	1.09837	0
290	0.139328	0	0.136307	0	0.137818	0
291	0.208992	0	0.218092	0	0.213542	0
292	0.905633	0	0.613383	0	0.759508	0
293	0.052248	0	0.109046	0	0.080647	0
294	0.365736	0	0.422553	0	0.394144	0
295	0.592144	0	0.449814	0	0.520979	0
296	4.05793	-0.017416	3.95291	0	4.00542	-0.00870801
297	0.957881	0	0.708798	0	0.833339	0
298	1.04496	0	0.667906	0	0.856433	0
299	1.42811	0	1.49938	0	1.46375	0
300	1.09721	0	0.940521	0	1.01886	0
301	2.07251	0	2.7943	-0.0136307	2.4334	-0.00681537
302	0.957881	0	1.33581	0	1.14685	0
303	1.28878	0	0.967782	0	1.12828	0
304	0.69664	0	0.654275	0	0.675458	0
305	0.835969	0	0.899628	0	0.867798	0
306	1.01013	0	0.940521	0	0.975325	0
307	0.365736	0	0.545229	0	0.455483	0
308	0.452816	0	0.477076	0	0.464946	0
309	0.644392	0	0.776952	0	0.710672	0
310	5.69504	0	5.73854	0	5.71679	0
311	0.0870801	0	0.0954151	0	0.0912476	0
312	0.661808	0	0.92689	0	0.794349	0
313	0.539896	0	0.74969	0	0.644793	0
314	0.539896	0	0.667906	0	0.603901	0
315	0.975297	0	0.845105	0	0.910201	0
316	0.296072	0	0.258984	0	0.277528	0
317	1.51519	0	1.21314	0	1.36416	0
318	0.888217	0	0.776952	0	0.832584	0
319	0.296072	0	0.0681537	0	0.182113	0
320	3.83152	0	4.08922	-0.0136307	3.96037	-0.00681537
321	1.55003	0	2.12639	0	1.83821	0
322	6.72258	0	5.28872	0	6.00565	0
323	1.82868	0	2.04461	0	1.93665	0
324	2.82139	0	2.09913	0	2.46026	0
325	0.400568	0	0.722429	0	0.561499	0
326	0.26124	0	0.395291	0	0.328266	0
327	0.296072	0	0.408922	0	0.352497	0
328	1.09721	0	0.940521	0	1.01886	0
329	0.330904	0	0.422553	0	0.376728	0
330	0.365736	0	0.572491	0	0.469114	0
331	1.68935	0	2.12639	-0.0136307	1.90787	-0.00681537
332	6.87932	0	6.99257	0	6.93595	0
333	2.50791	0	2.31722	-0.0136307	2.41257	-0.00681537
334	1.79385	0	1.86741	0	1.83063	0
335	9.49173	0	9.05081	0	9.27127	0
336	0.940465	0	0.804213	0	0.872339	0
337	0.557312	0	0.531599	0	0.544455	0
338	0.208992	0	0.395291	0	0.302142	0
339	0.17416	0	0.258984	0	0.216572	0
340	0.156744	0	0.19083	0	0.173787	0
341	0.156744	0	0.258984	0	0.207864	0
342	0.870801	0	1.11772	0	0.99426	0
343	2.56015	0	2.7943	-0.0136307	2.67723	-0.00681537
344	0.888217	0	0.831475	0	0.859846	0
345	3.03039	0	2.94424	0	2.98731	0
346	0.52248	0	0.572491	0	0.547486	0
347	0.539896	0	0.885998	0	0.712947	0
348	0.139328	0	0.0817844	0	0.110556	0
349	1.01013	0	0.899628	0	0.954879	0
350	0.661808	0	0.940521	0	0.801165	0
351	3.84894	0	4.04833	0	3.94863	0
352	1.49778	0	2.14003	0	1.8189	0
353	1.42811	0	1.39033	0	1.40922	0
354	1.21912	0	1.29492	0	1.25702	0
355	1.13204	0	1.48575	0	1.3089	0
356	5.12031	-0.017416	5.43866	0	5.27949	-0.00870801
357	0.243824	0	0.122677	0	0.18325	0
358	0.417984	0	0.381661	0	0.399822	0
359	0.26124	0	0.381661	0	0.32145	0
360	1.16687	0	0.831475	0	0.999174	0
361	0.574728	0	0.899628	0	0.737178	0
362	2.21183	0	2.6171	0	2.41447	0
363	0.34832	0	0.640644	0	0.494482	0
364	0.191576	0	0.136307	0	0.163942	0
365	0.52248	0	0.531599	0	0.527039	0
366	1.32362	0	1.47212	0	1.39787	0
367	2.54274	0	2.64436	0	2.59355	0
368	3.25679	0	2.54895	-0.0136307	2.90287	-0.00681537
369	2.50791	0	2.94424	0	2.72607	0
370	4.59783	0	4.25279	0	4.42531	0
371	0.957881	0	1.07683	0	1.01735	0
372	2.99555	0	2.9715	0	2.98353	0
373	3.98827	-0.017416	5.057	0	4.52263	-0.00870801
374	0.208992	0	0.1772	0	0.193096	0
375	0.557312	0	0.599752	0	0.578532	0
376	0.835969	0	0.858736	0	0.847352	0
377	0.505064	0	0.354399	0	0.429732	0
378	0.156744	0	0.19083	0	0.173787	0
379	2.64723	-0.017416	2.78067	0	2.71395	-0.00870801
380	0.940465	0	1.3767	0	1.15858	0
381	2.38599	0	2.11276	0	2.24938	0
382	1.14946	0	1.39033	0	1.2699	0
383	0.26124	0	0.381661	0	0.32145	0
384	1.09721	0	1.39033	0	1.24377	0
385	0.313488	0	0.354399	0	0.333944	0
386	0.26124	0	0.272615	0	0.266927	0
387	0.731473	0	0.708798	0	0.720135	0
388	1.72419	0	2.42627	0	2.07523	0
389	1.8461	0	2.60347	0	2.22478	0
390	0.557312	0	0.681537	0	0.619425	0
391	0.714056	0	0.586122	0	0.650089	0
392	0.208992	0	0.136307	0	0.17265	0
393	3.25679	0	3.23048	0	3.24364	0
394	1.07979	0	0.995044	0	1.03742	0
395	3.37871	0	4.51177	0	3.94524	0
396	0.818553	0	0.899628	0	0.85909	0
397	0.957881	0	1.09046	0	1.02417	0
398	1.39328	0	1.44486	0	1.41907	0
399	0.121912	0	0.313507	0	0.217709	0
400	0.783721	0	0.681537	0	0.732629	0
401	2.38599	0	2.09913	0	2.24256	0
402	0.121912	0	0.1772	0	0.149556	0
403	0.139328	0	0.231722	0	0.185525	0
404	0.60956	0	0.613383	0	0.611472	0
405	0.452816	0	0.790583	0	0.621699	0
406	1.16687	0	1.64932	0	1.4081	0
407	3.44837	0	3.44858	0	3.44847	0
408	2.64723	0	3.57125	0	3.10924	0
409	1.27137	0	2.19455	0	1.73296	0
410	1.28878	0	1.00867	0	1.14873	0
411	0.60956	0	0.504337	0	0.556949	0
412	0.313488	0	0.0817844	0	0.197636	0
413	1.44553	0	1.5539	0	1.49972	0
414	0.052248	0	0.0408922	0	0.0465701	0
415	0.365736	0	0.422553	0	0.394144	0
416	0.296072	0	0.354399	0	0.325236	0
417	0.940465	0	0.722429	0	0.831447	0
418	0.539896	0	0.73606	0	0.637978	0
419	3.83152	0	4.40273	-0.0272615	4.11712	-0.0136307
420	3.79669	0	3.77571	0	3.7862	0
421	4.12759	0	4.06196	0	4.09478	0
422	3.65736	0	4.02107	0	3.83921	0
423	2.90847	0	2.90335	0	2.90591	0
424	1.3062	0	2.30359	0	1.8049	0
425	0.487648	0	0.681537	0	0.584593	0
426	0.034832	0	0.0954151	0	0.0651236	0
427	0.801137	0	0.790583	0	0.79586	0
428	0.365736	0	0.667906	0	0.516821	0
429	0.679224	0	1.0632	0	0.871211	0
430	1.06238	0	1.21314	0	1.13776	0
431	0.853385	0	1.02231	0	0.937845	0
432	0.26124	0	0.354399	0	0.30782	0
433	0.296072	0	0.286245	0	0.291159	0
434	3.86635	0	5.27509	0	4.57072	0
435	0.470232	0	0.504337	0	0.487285	0
436	2.6124	0	2.63073	0	2.62157	0
437	0.121912	0	0.258984	0	0.190448	0
438	3.13488	0	4.82528	0	3.98008	0
439	0.539896	0	0.776952	0	0.658424	0
440	2.02026	0	2.48079	0	2.25053	0
441	2.31633	0	2.15366	-0.0136307	2.23499	-0.00681537
442	1.32362	0	1.81289	0	1.56825	0
443	1.14946	0	1.30855	0	1.229	0
444	0.905633	0	1.11772	0	1.01168	0
445	1.60227	0	1.63569	0	1.61898	0
446	3.41354	0	2.71252	0	3.06303	0
447	0.731473	0	0.817844	0	0.774658	0
448	0.26124	0	0.436183	0	0.348712	0
449	2.43824	0	2.46716	0	2.4527	0
450	2.69948	0	4.04833	0	3.3739	0
451	2.19442	0	1.99009	0	2.09225	0
452	4.19726	0	4.42999	-0.0136307	4.31362	-0.00681537
453	0.400568	0	0.258984	0	0.329776	0
454	0.923049	0	1.3767	0	1.14988	0
455	0.296072	0	0.572491	0	0.434282	0
456	1.27137	0	1.86741	0	1.56939	0
457	1.88093	0	1.84015	0	1.86054	0
458	0.191576	0	0.163569	0	0.177572	0
459	0.801137	-0.034832	0.899628	0	0.850382	-0.017416
460	1.42811	0	1.33581	0	1.38196	0
461	2.177	0	2.4399	0	2.30845	0
462	0.470232	0	0.55886	0	0.514546	0
463	0.487648	0	0.995044	0	0.741346	0
464	7.76754	0	8.42379	0	8.09567	0
465	0.226408	0	0.313507	0	0.269958	0
466	7.41922	0	7.48327	-0.0136307	7.45125	-0.00681537
467	0.313488	0	0.74969	-0.0136307	0.531589	-0.00681537
468	3.37871	0	3.65304	0	3.51587	0
469	1.06238	0	1.52664	0	1.29451	0
470	1.7416	0	2.2627	-0.0136307	2.00215	-0.00681537
471	1.67194	0	2.18092	0	1.92643	0
472	0.539896	0	0.817844	0	0.67887	0
473	0.4354	0	0.395291	0	0.415346	0
474	0.52248	0	0.572491	0	0.547486	0
475	0.365736	0	0.395291	0	0.380514	0
476	0.452816	0	0.55886	0	0.505838	0
477	2.36858	0	3.03965	-0.0136307	2.70412	-0.00681537
478	1.13204	0	1.09046	0	1.11125	0
479	1.70677	0	1.97646	0	1.84161	0
480	0.365736	0	0.73606	0	0.550898	0
481	1.53261	0	1.69021	0	1.61141	0
482	0.626976	0	1.0632	0	0.845087	0
483	0.992713	0	1.17224	0	1.08248	0
484	0.539896	0	0.613383	0	0.57664	0
485	0.17416	0	0.327138	0	0.250649	0
486	1.13204	0	1.22677	0	1.1794	0
487	0.470232	0	0.55886	0	0.514546	0
488	1.39328	0	1.97646	0	1.68487	0
489	0.905633	0	1.43123	0	1.16843	0
490	0.801137	0	0.858736	0	0.829936	0
491	1.51519	0	2.22181	-0.0136307	1.8685	-0.00681537
492	0.208992	0	0.204461	0	0.206727	0
493	1.16687	-0.017416	1.94919	-0.0136307	1.55803	-0.0155234
494	0.748889	0	0.885998	0	0.817443	0
495	0.383152	0	0.436183	0	0.409668	0
496	0.52248	0	0.763321	0	0.642901	0
497	0.505064	0	0.545229	0	0.525147	0
498	0.592144	0	0.695167	0	0.643656	0
499	1.42811	0	1.62206	0	1.52509	0
500	3.44837	0	3.46221	0	3.45529	0
501	1.23654	0	1.44486	0	1.3407	0
502	0.992713	0	1.04957	0	1.02114	0
503	2.22925	0	2.41264	0	2.32094	0
504	4.80682	0	4.8798	0	4.84331	0
505	1.51519	0	1.22677	0	1.37098	0
506	1.37586	0	1.99009	0	1.68298	0
507	1.23654	0	1.44486	0	1.3407	0
508	0.26124	0	0.722429	0	0.491835	0
509	0.17416	0	0.463445	0	0.318803	0
510	0.714056	0	1.13135	0	0.922704	0
511	0.905633	0	1.04957	0	0.9776	0
512	1.37586	0	1.4176	0	1.39673	0
513	1.96801	0	2.75341	0	2.36071	0
514	1.06238	0	1.36307	0	1.21273	0
515	0.748889	0	0.790583	0	0.769736	0
516	0.104496	0	0.327138	0	0.215817	0
517	0.278656	0	0.545229	0	0.411943	0
518	1.61969	0	2.38538	0	2.00253	0
519	0.470232	0	0.531599	0	0.500915	0
520	2.24667	0	2.46716	0	2.35691	0
521	0.156744	-0.017416	0.163569	0	0.160156	-0.00870801
522	1.02754	0	1.02231	0	1.02492	0
523	0.592144	0	0.899628	0	0.745886	0
524	1.55003	0	1.66295	-0.0136307	1.60649	-0.00681537
525	3.4832	0	3.8575	0	3.67035	0
526	0.139328	0	0.327138	0	0.233233	0
527	0.592144	0	1.03594	0	0.81404	0
528	0.226408	0	0.381661	0	0.304034	0
529	0.226408	0	0.299876	0	0.263142	0
530	2.64723	0	2.67162	0	2.65943	0
531	0.034832	0	0.0954151	0	0.0651236	0
532	0.557312	0	0.504337	0	0.530825	0
533	0.17416	0	0.354399	0	0.26428	0
534	3.34387	0	3.77571	0	3.55979	0
535	0.714056	0	0.695167	0	0.704612	0
536	0.34832	0	0.449814	0	0.399067	0
537	0.853385	0	0.790583	0	0.821984	0
538	0.888217	0	1.02231	0	0.955261	0
539	0.975297	0	1.79926	0	1.38728	0
540	0.60956	0	0.613383	0	0.611472	0
541	1.48036	0	1.94919	0	1.71478	0
542	3.53545	0	4.77076	0	4.1531	0
543	0.505064	0	0.940521	0	0.722792	0
544	0.783721	0	0.899628	0	0.841674	0
545	0.783721	0	0.981413	0	0.882567	0
546	0.835969	0	0.817844	0	0.826906	0
547	0.243824	0	0.408922	0	0.326373	0
548	2.80398	0	3.81661	0	3.31029	0
549	0.818553	0	0.92689	0	0.872721	0
550	4.07535	0	5.99752	0	5.03643	0
551	0.940465	0	0.804213	-0.0272615	0.872339	-0.0136307
552	2.83881	0	3.92565	0	3.38223	0
553	0.853385	0	1.3767	0	1.11504	0
554	0.4354	0	0.354399	0	0.3949	0
555	0.26124	0	0.463445	0	0.362343	0
556	1.49778	0	1.69021	0	1.59399	0
557	2.15959	0	3.13507	0	2.64733	0
558	0.034832	0	0.0954151	0	0.0651236	0
559	0.644392	0	0.572491	0	0.608442	0
560	1.42811	0	1.22677	0	1.32744	0
561	1.21912	0	1.71747	0	1.4683	0
562	0.452816	0	0.163569	0	0.308193	0
563	0.191576	0	0.422553	0	0.307064	0
564	0.034832	0	0.0681537	0	0.0514928	0
565	0.156744	0	0.340768	0	0.248756	0
566	0.017416	0	0.0954151	0	0.0564156	0
567	0.417984	0	0.858736	0	0.63836	0
568	0.4354	0	0.708798	0	0.572099	0
569	0.557312	0	1.0632	0	0.810255	0
570	0.296072	-0.017416	0.586122	0	0.441097	-0.00870801
571	0.139328	0	0.109046	0	0.124187	0
572	0.26124	0	0.36803	0	0.314635	0
573	0.644392	0	0.613383	0	0.628888	0
574	7.41922	0	8.83272	0	8.12597	0
575	5.72987	-0.017416	7.30607	0	6.51797	-0.00870801
576	1.7416	0	2.50805	0	2.12483	0
577	0.34832	0	0.354399	0	0.35136	0
578	2.02026	0	2.19455	0	2.1074	0
579	1.44553	0	1.75836	0	1.60195	0
580	0.487648	-0.017416	0.92689	0	0.707269	-0.00870801
581	1.18429	0	1.36307	0	1.27368	0
582	0.26124	0	0.272615	0	0.266927	0
583	0.156744	0	0.1772	0	0.166972	0
584	0.34832	0	0.504337	0	0.426329	0
585	0.034832	0	0.0408922	0	0.0378621	0
586	0.557312	0	0.708798	0	0.633055	0
587	0.679224	0	1.40397	0	1.0416	0
588	1.06238	0	1.22677	0	1.14457	0
589	1.04496	0	1.36307	0	1.20402	0
590	0.888217	0	1.49938	0	1.1938	0
591	0.243824	0	0.327138	0	0.285481	0
592	3.62253	0	5.80669	0	4.71461	0
593	2.66465	0	2.38538	0	2.52501	0
594	0.104496	0	0.0681537	0	0.0863249	0
595	1.86351	0	2.57621	0	2.21986	0
596	4.11018	0	4.2119	0	4.16104	0
597	1.88093	0	2.01735	0	1.94914	0
598	1.35845	0	1.4176	0	1.38802	0
599	1.88093	0	2.68525	0	2.28309	0
600	0.452816	0	0.899628	0	0.676222	0
601	0.226408	0	0.408922	0	0.317665	0
602	0.104496	0	0.340768	0	0.222632	0
603	0.139328	0	0.109046	0	0.124187	0
604	0.835969	0	1.10409	0	0.970029	0
605	1.04496	0	1.17224	0	1.1086	0
606	5.05064	0	5.82032	0	5.43548	0
607	0.731473	0	0.681537	0	0.706505	0
608	4.14501	0	5.88848	-0.0136307	5.01674	-0.00681537
609	1.61969	0	2.91698	0	2.26833	0
610	0.818553	0	0.954151	0	0.886352	0
611	2.49049	0	2.99876	0	2.74463	0
612	0.923049	0	1.03594	0	0.979492	0
613	2.49049	0	2.01735	0	2.25392	0
614	5.08548	0	6.43371	0	5.75959	0
615	3.23938	0	3.39405	0	3.31672	0
616	1.34103	0	1.81289	0	1.57696	0
617	0.992713	0	1.17224	0	1.08248	0
618	0.121912	0	0.0545229	0	0.0882175	0
619	0.26124	0	0.245353	0	0.253297	0
620	0.452816	0	0.449814	0	0.451315	0
621	0.104496	0	0.1772	0	0.140848	0
622	0.365736	0	0.313507	0	0.339622	0
623	0.69664	0	1.0632	-0.0136307	0.879919	-0.00681537
624	0.017416	0	0.0681537	0	0.0427848	0
625	0.592144	0	0.667906	-0.0136307	0.630025	-0.00681537
626	0.243824	0	0.299876	0	0.27185	0
627	1.32362	0	2.20818	0	1.7659	0
628	0.801137	0	0.804213	0	0.802675	0
629	2.47307	-0.034832	3.66667	0	3.06987	-0.017416
630	1.65452	0	2.53532	0	2.09492	0
631	1.42811	0	1.64932	-0.0272615	1.53872	-0.0136307
632	0.783721	0	1.25403	0	1.01887	0
633	0.626976	0	1.17224	-0.0136307	0.89961	-0.00681537
634	6.21752	-0.034832	6.48823	0	6.35287	-0.017416
635	1.04496	0	1.17224	0	1.1086	0
636	0.870801	0	0.899628	-0.0272615	0.885215	-0.0136307
637	1.13204	-0.017416	0.708798	0	0.920419	-0.00870801
638	0.191576	0	0.19083	0	0.191203	0
639	0.60956	0	0.954151	0	0.781856	0
640	0.121912	0	0.327138	0	0.224525	0
641	2.80398	-0.017416	3.06692	0	2.93545	-0.00870801
642	0.818553	0	1.28129	0	1.04992	0
643	0.714056	0	0.73606	0	0.725058	0
644	2.83881	0	2.68525	0	2.76203	0
645	2.6124	0	2.64436	0	2.62838	0
646	3.03039	0	3.54399	0	3.28719	0
647	0.592144	0	0.776952	0	0.684548	0
648	0.801137	0	0.73606	0	0.768598	0
649	0.452816	0	0.627014	0	0.539915	0
650	0.226408	0	0.395291	0	0.31085	0
651	0.208992	0	0.531599	0	0.370295	0
652	0.975297	0	1.1995	0	1.0874	0
653	0.330904	0	0.258984	0	0.294944	0
654	2.50791	0	3.88476	0	3.19633	0
655	2.92589	-0.017416	2.24907	0	2.58748	-0.00870801
656	1.01013	0	0.995044	0	1.00259	0
657	1.51519	0	1.67658	0	1.59589	0
658	2.85623	-0.017416	3.16233	0	3.00928	-0.00870801
659	2.75173	0	2.84882	0	2.80028	0
660	3.22196	0	3.96654	-0.0136307	3.59425	-0.00681537
661	0.661808	0	0.517968	-0.0136307	0.589888	-0.00681537
662	0.539896	0	0.790583	0	0.665239	0
663	0.714056	0	1.02231	0	0.868181	0
664	1.89835	0	1.9083	0	1.90332	0
665	0.801137	0	0.858736	0	0.829936	0
666	0.052248	0	0.0408922	0	0.0465701	0
667	0.487648	0	0.695167	0	0.591408	0
668	2.19442	-0.034832	2.93061	0	2.56251	-0.017416
669	0.539896	0	0.354399	0	0.447148	0
670	1.16687	0	1.51301	0	1.33994	0
671	0.34832	0	0.395291	0	0.371806	0
672	3.37871	0	4.47088	0	3.92479	0
673	0.330904	0	0.395291	0	0.363098	0
674	7.08832	-0.034832	8.68278	0	7.88555	-0.017416
675	0.208992	0	0.272615	0	0.240803	0
676	1.39328	0	1.39033	0	1.39181	0
677	2.78656	-0.034832	4.51177	-0.0136307	3.64917	-0.0242314
678	0.870801	0	1.04957	0	0.960184	0
679	4.66749	0	7.25155	0	5.95952	0
680	3.93602	-0.017416	5.2342	-0.0136307	4.58511	-0.0155234
681	1.49778	0	1.44486	0	1.47132	0
682	0.574728	0	0.708798	0	0.641763	0
683	0.766305	0	0.790583	0	0.778444	0
684	0.592144	0	0.74969	0	0.670917	0
685	0.574728	0	0.463445	0	0.519087	0
686	0.748889	0	0.845105	0	0.796997	0
687	0.104496	0	0.163569	0	0.134032	0
688	0.731473	0	0.872367	0	0.80192	0
689	0.156744	0	0.299876	0	0.22831	0
690	0.052248	0	0.381661	0	0.216954	0
691	0.452816	0	0.73606	0	0.594438	0
692	0.801137	0	1.07683	0	0.938982	0
693	0.940465	0	1.26766	0	1.10406	0
694	0.818553	0	0.967782	0	0.893167	0
695	0.26124	0	0.408922	0	0.335081	0
696	0.069664	0	0.149938	0	0.109801	0
697	0.975297	0	1.3767	0	1.176	0
698	2.14217	-0.034832	3.29864	0	2.7204	-0.017416
699	2.08992	0	3.06692	0	2.57842	0
700	0.731473	0	0.940521	0	0.835997	0
701	6.9664	-0.017416	6.55638	0	6.76139	-0.00870801
702	3.97085	0	5.64312	0	4.80699	0
703	5.59054	0	6.66543	0	6.12798	0
704	0.975297	0	1.02231	0	0.998801	0
705	2.03767	0	2.2627	0	2.15019	0
706	0.60956	0	0.572491	0	0.591026	0
707	0.52248	0	0.667906	0	0.595193	0
708	1.14946	0	1.66295	0	1.4062	0
709	0.208992	0	0.204461	0	0.206727	0
710	0.714056	0	0.817844	0	0.76595	0
711	3.69219	0	2.56258	0	3.12739	0
712	1.3062	0	1.34944	0	1.32782	0
713	2.24667	0	2.93061	0	2.58864	0
714	2.15959	0	2.75341	0	2.4565	0
715	5.97369	0	5.92937	0	5.95153	0
716	0.574728	0	0.74969	0	0.662209	0
717	2.2815	0	2.68525	0	2.48338	0
718	8.20294	0	9.03718	0	8.62006	0
719	2.35116	0	2.07187	0	2.21152	0
720	1.25395	-0.017416	1.34944	-0.0136307	1.3017	-0.0155234
721	3.20455	0	3.65304	0	3.42879	0
722	0.191576	0	0.136307	0	0.163942	0
723	0.313488	0	0.36803	0	0.340759	0
724	0.191576	0	0.218092	0	0.204834	0
725	0.26124	0	0.149938	0	0.205589	0
726	0	0	0.0954151	0	0.0477076	0
727	0.034832	0	0.0545229	0	0.0446775	0
728	0.104496	-0.017416	0.0817844	-0.0272615	0.0931402	-0.0223387
729	0.052248	0	0.245353	0	0.148801	0
730	0.104496	0	0.231722	0	0.168109	0
731	0.313488	0	0.627014	0	0.470251	0
732	2.10734	0	3.12144	0	2.61439	0
733	0.957881	0	2.05824	0	1.50806	0
734	1.14946	0	1.64932	0	1.39939	0
735	0.505064	0	0.667906	-0.0136307	0.586485	-0.00681537
736	0.783721	0	0.73606	0	0.75989	0
737	2.80398	0	3.8575	0	3.33074	0
738	1.93318	0	2.78067	0	2.35692	0
739	0.365736	0	0.395291	0	0.380514	0
740	0.17416	0	0.463445	0	0.318803	0
741	0.226408	0	0.667906	0	0.447157	0
742	2.40341	0	2.80793	0	2.60567	0
743	0.400568	0	0.722429	0	0.561499	0
744	0.679224	0	0.967782	0	0.823503	0
745	0.226408	0	0.1772	0	0.201804	0
746	1.25395	0	1.40397	0	1.32896	0
747	0.957881	0	1.0632	0	1.01054	0
748	0.592144	0	1.07683	0	0.834486	0
749	1.18429	0	2.01735	0	1.60082	0
750	1.79385	0	3.08055	0	2.4372	0
751	3.37871	0	4.53903	0	3.95887	0
752	0.957881	0	1.56753	0	1.26271	0
753	3.86635	0	4.67534	0	4.27085	0
754	0.400568	0	0.449814	0	0.425191	0
755	0.383152	0	0.531599	0	0.457375	0
756	2.22925	0	2.68525	0	2.45725	0
757	0.069664	0	0.286245	0	0.177955	0
758	0.365736	0	0.340768	0	0.353252	0
759	0.226408	0	0.149938	0	0.188173	0
760	0.52248	0	0.613383	0	0.567932	0
761	0.69664	0	0.831475	0	0.764058	0
762	1.34103	0	0.640644	0	0.990839	0
763	1.63711	0	2.34449	0	1.9908	0
764	0.156744	0	0.204461	0	0.180603	0
765	2.31633	0	3.17596	-0.0272615	2.74615	-0.0136307
766	0.34832	0	0.313507	0	0.330914	0
767	0.487648	0	0.340768	0	0.414208	0
768	1.21912	0	1.4176	0	1.31836	0
769	0.296072	0	0.258984	0	0.277528	0
770	0.626976	0	0.258984	0	0.44298	0
771	0.121912	0	0.1772	0	0.149556	0
772	0.034832	0	0.0954151	0	0.0651236	0
773	1.04496	0	0.981413	0	1.01319	0
774	0.156744	0	0.272615	0	0.214679	0
775	1.01013	0	1.5539	0	1.28202	0
776	3.16971	0	3.84387	0	3.50679	0
777	1.14946	0	1.58117	0	1.36531	0
778	2.177	0	2.14003	0	2.15851	0
779	2.02026	0	2.35812	0	2.18919	0
780	3.18713	0	2.93061	0	3.05887	0
781	2.76915	0	3.63941	0	3.20428	0
782	1.55003	0	1.48575	0	1.51789	0
783	0.714056	0	1.0632	0	0.888627	0
784	0.870801	0	0.872367	0	0.871584	0
785	0.104496	0	0.19083	0	0.147663	0
786	0.069664	0	0.0272615	0	0.0484628	0
787	2.43824	0	2.9715	0	2.70487	0
788	0.226408	0	0.449814	0	0.338111	0
789	0.539896	-0.017416	0.872367	0	0.706132	-0.00870801
790	1.21912	0	1.2404	0	1.22976	0
791	0.052248	0	0.163569	0	0.107908	0
792	0.121912	0	0.36803	0	0.244971	0
793	0.626976	0	0.422553	0	0.524765	0
794	2.03767	0	2.15366	0	2.09566	0
795	0.226408	0	0.286245	0	0.256327	0
796	5.03323	0	6.92441	-0.0136307	5.97882	-0.00681537
797	1.61969	0	1.84015	0	1.72992	0
798	0.661808	0	0.667906	0	0.664857	0
799	1.55003	0	1.52664	0	1.53833	0
800	4.37142	0	4.67534	0	4.52338	0
801	1.06238	0	1.79926	0	1.43082	0
802	1.55003	0	1.60843	0	1.57923	0
803	3.16971	0	3.98017	0	3.57494	0
804	11.8603	0	13.5217	0	12.691	0
805	0.313488	0	0.36803	0	0.340759	0
806	0.243824	0	0.517968	0	0.380896	0
807	1.06238	0	1.64932	0	1.35585	0
808	0.417984	0	0.477076	0	0.44753	0
809	0.975297	0	0.899628	-0.0272615	0.937463	-0.0136307
810	0.34832	0	0.463445	0	0.405883	0
811	0.191576	0	0.218092	0	0.204834	0
812	0.296072	0	0.463445	0	0.379759	0
813	0.313488	0	0.272615	0	0.293051	0
814	3.67478	0	3.76208	0	3.71843	0
815	1.81127	0	2.34449	0	2.07788	0
816	7.0709	0	9.18711	0	8.12901	0
817	0.539896	0	0.640644	0	0.59027	0
818	0.069664	0	0.109046	0	0.089355	0
819	0.156744	0	0.313507	0	0.235125	0
820	1.88093	0	2.46716	0	2.17405	0
821	0.487648	0	0.408922	0	0.448285	0
822	0.069664	0	0.354399	0	0.212032	0
823	0.156744	-0.017416	0.395291	0	0.276018	-0.00870801
824	0.400568	0	0.449814	0	0.425191	0
825	0.505064	0	0.436183	0	0.470624	0
826	0.156744	0	0.109046	0	0.132895	0
827	0.34832	0	0.340768	0	0.344544	0
828	0.383152	0	0.313507	0	0.34833	0
829	0.644392	0	0.517968	0	0.58118	0
830	0.417984	0	0.504337	0	0.461161	0
831	0.156744	0	0.218092	0	0.187418	0
832	5.34672	0	5.31599	0	5.33135	0
833	0.278656	0	0.490706	0	0.384681	0
834	0.278656	0	0.204461	0	0.241559	0
835	0.330904	0	0.258984	0	0.294944	0
836	0.748889	0	0.613383	0	0.681136	0
837	0.923049	0	1.00867	0	0.965861	0
838	1.77643	0	2.50805	0	2.14224	0
839	0.992713	0	0.845105	0	0.918909	0
840	0.487648	0	0.613383	0	0.550516	0
841	0.208992	0	0.258984	0	0.233988	0
842	0.0870801	0	0.204461	0	0.145771	0
843	0.330904	0	0.204461	0	0.267683	0
844	0.0870801	0	0.109046	0	0.098063	0
845	1.11462	0	1.03594	0	1.07528	0
846	0.26124	0	0.776952	0	0.519096	0
847	0.26124	0	0.1772	0	0.21922	0
848	0.017416	0	0.0817844	0	0.0496002	0
849	0.139328	0	0.149938	0	0.144633	0
850	0.26124	0	0.395291	0	0.328266	0
851	1.13204	0	1.10409	0	1.11807	0
852	1.58486	0	1.9083	0	1.74658	0
853	0.191576	0	0.354399	0	0.272988	0
854	0.644392	0	0.967782	0	0.806087	0
855	0.313488	0	0.599752	0	0.45662	0
856	0.801137	0	1.14498	0	0.973059	0
857	0.69664	0	0.722429	0	0.709535	0
858	0.34832	0	0.36803	0	0.358175	0
859	1.18429	0	1.13135	-0.0272615	1.15782	-0.0136307
860	0.139328	0	0.163569	0	0.151448	0
861	0.940465	0	0.831475	0	0.88597	0
862	0.0870801	0	0.0954151	0	0.0912476	0
863	0.679224	0	0.790583	0	0.734904	0
864	0.226408	0	0.36803	0	0.297219	0
865	0.139328	0	0.218092	0	0.17871	0
866	0.052248	0	0.0136307	0	0.0329394	0
867	0.4354	0	0.436183	0	0.435792	0
868	0.278656	0	0.572491	0	0.425573	0
869	1.18429	0	1.99009	0	1.58719	0
870	0.139328	0	0.0681537	0	0.103741	0
871	0.975297	0	1.33581	0	1.15555	0
872	1.3062	0	1.32218	0	1.31419	0
873	0.104496	0	0.109046	0	0.106771	0
874	4.12759	0	4.33457	-0.0408922	4.23108	-0.0204461
875	1.35845	0	1.15861	-0.0136307	1.25853	-0.00681537
876	0.574728	0	0.517968	-0.0136307	0.546348	-0.00681537
877	1.27137	0	1.48575	-0.0136307	1.37856	-0.00681537
878	2.52532	-0.017416	3.28501	0	2.90516	-0.00870801
879	0.26124	0	0.586122	-0.0408922	0.423681	-0.0204461
880	1.01013	0	1.39033	-0.0136307	1.20023	-0.00681537
881	0.26124	0	0.204461	0	0.232851	0
882	1.55003	0	1.70384	0	1.62693	0
883	0.330904	0	0.408922	0	0.369913	0
884	1.09721	0	0.940521	-0.0136307	1.01886	-0.00681537
885	2.19442	0	2.31722	0	2.25582	0
886	0.801137	0	0.654275	0	0.727706	0
887	0.470232	0	0.73606	0	0.603146	0
888	0.296072	0	0.395291	0	0.345682	0
889	2.96072	0	3.51673	0	3.23873	0
890	0.383152	0	0.408922	0	0.396037	0
891	1.67194	0	2.03098	0	1.85146	0
892	9.03891	-0.017416	12.8402	-0.0408922	10.9395	-0.0291541
893	0.243824	0	0.218092	0	0.230958	0
894	0.069664	0	0.163569	-0.0136307	0.116616	-0.00681537
895	1.61969	0	2.63073	0	2.12521	0
896	0.139328	0	0.258984	0	0.199156	0
897	0.313488	0	0.245353	0	0.279421	0
898	0.034832	0	0.0272615	0	0.0310467	0
899	0.52248	0	0.640644	-0.0545229	0.581562	-0.0272615
900	0.052248	0	0.0817844	0	0.0670162	0
901	0.470232	0	0.545229	0	0.507731	0
902	0.52248	0	0.708798	0	0.615639	0
903	0.243824	0	0.436183	0	0.340004	0
904	0.243824	0	0.36803	-0.0136307	0.305927	-0.00681537
905	0	0	0.0545229	0	0.0272615	0
906	0.069664	0	0.204461	0	0.137063	0
907	0.383152	0	0.381661	0	0.382406	0
908	0.853385	0	0.763321	0	0.808353	0
909	0.69664	0	0.967782	0	0.832211	0
910	0.069664	0	0.0545229	0	0.0620935	0
911	0.208992	0	0.1772	0	0.193096	0
912	0.017416	0	0.0272615	0	0.0223387	0
913	0.052248	0	0.1772	0	0.114724	0
914	0.208992	0	0.204461	0	0.206727	0
915	0.888217	0	1.25403	0	1.07112	0
916	0.330904	0	0.74969	0	0.540297	0
917	0.121912	0	0.204461	0	0.163187	0
918	0.139328	0	0.109046	0	0.124187	0
919	0.121912	0	0.245353	0	0.183633	0
920	0.17416	0	0.245353	0	0.209757	0
921	0.330904	0	0.395291	0	0.363098	0
922	0.26124	0	0.1772	0	0.21922	0
923	0.156744	0	0.19083	0	0.173787	0
924	0.052248	0	0.0954151	0	0.0738316	0
925	0.4354	0	0.231722	0	0.333561	0
926	0.243824	0	0.340768	0	0.292296	0
927	0.104496	0	0.109046	0	0.106771	0
928	0.330904	0	0.272615	0	0.301759	0
929	0.330904	0	0.149938	0	0.240421	0
930	0.60956	0	0.790583	0	0.700071	0
931	0.731473	0	0.627014	0	0.679243	0
932	3.74444	0	3.63941	-0.0408922	3.69192	-0.0204461
933	0.940465	0	0.913259	0	0.926862	0
934	0.557312	0	0.599752	0	0.578532	0
935	0.383152	0	0.218092	0	0.300622	0
936	0.121912	0	0.0545229	0	0.0882175	0
937	0.714056	0	1.18587	0	0.949965	0
938	2.49049	0	2.82156	0	2.65603	0
939	1.06238	0	1.09046	0	1.07642	0
940	0.487648	0	0.599752	0	0.5437	0
941	0.0870801	0	0.0408922	0	0.0639861	0
942	3.27421	0	3.33953	-0.0136307	3.30687	-0.00681537
943	0.296072	0	0.436183	0	0.366128	0
944	0.539896	0	0.231722	0	0.385809	0
945	0.191576	0	0.218092	0	0.204834	0
946	0.34832	0	0.490706	0	0.419513	0
947	0.383152	0	0.231722	0	0.307437	0
948	0.940465	0	0.490706	0	0.715586	0
949	0.470232	0	0.408922	0	0.439577	0
950	0.26124	0	0.286245	0	0.273743	0
951	0.783721	0	1.3767	0	1.08021	0
952	0.26124	0	0.313507	0	0.287374	0
953	5.18997	0	7.3197	0	6.25484	0
954	2.22925	0	4.25279	0	3.24102	0
955	12.853	0	11.777	0	12.315	0
956	0.818553	0	0.722429	0	0.770491	0
957	0.156744	0	0.122677	0	0.13971	0
958	0.4354	0	0.1772	0	0.3063	0
959	0.104496	0	0.136307	0	0.120402	0
960	0.034832	0	0.0954151	0	0.0651236	0
961	0.034832	0	0.0272615	0	0.0310467	0
962	0.17416	0	0.1772	0	0.17568	0
963	0.017416	0	0	0	0.00870801	0
964	0.191576	0	0.218092	0	0.204834	0
965	0.278656	0	0.313507	0	0.296082	0
966	0.191576	0	0.19083	0	0.191203	0
967	0.452816	0	0.599752	0	0.526284	0
968	0.365736	0	0.586122	-0.0136307	0.475929	-0.00681537
969	0.034832	0	0.0954151	0	0.0651236	0
970	0.0870801	0	0.0681537	0	0.0776169	0
971	0.052248	0	0.0681537	0	0.0602009	0
972	0.626976	0	0.408922	0	0.517949	0
973	0.104496	0	0.136307	0	0.120402	0
974	0	0	0.0136307	0	0.00681537	0
975	0.4354	0	0.545229	0	0.490315	0
976	0	0	0.0954151	0	0.0477076	0
977	0.017416	0	0.0136307	0	0.0155234	0
978	0.069664	0	0.0272615	0	0.0484628	0
979	0.017416	0	0.0136307	0	0.0155234	0
980	0	0	0.0272615	0	0.0136307	0
981	0	0	0.0136307	0	0.00681537	0
982	0.052248	0	0	0	0.026124	0
983	0.017416	0	0.0681537	0	0.0427848	0
984	0	0	0	0	0	0
985	0	0	0	0	0	0
986	0	0	0.0408922	0	0.0204461	0
987	0	0	0	0	0	0
988	0	0	0.0136307	0	0.00681537	0
989	0.017416	0	0.0136307	0	0.0155234	0
990	0	0	0	0	0	0
991	0	0	0.0272615	0	0.0136307	0
992	0	0	0	0	0	0
993	0	0	0.0136307	0	0.00681537	0
994	0	0	0	0	0	0
995	0.034832	0	0	0	0.017416	0
996	0	0	0	0	0	0
997	0	0	0	0	0	0
998	0	0	0	0	0	0
999	0	0	0	0	0	0
1000	0	0	0	0	0	0
1001	0	0	0.0272615	0	0.0136307	0
1002	0.104496	0	0.149938	0	0.127217	0
1003	0	0	0.0136307	0	0.00681537	0
1004	0	0	0	0	0	0
1005	0	0	0	0	0	0
1006	0	0	0.0272615	0	0.0136307	0
1007	0	0	0	0	0	0
1008	0.052248	0	0.0272615	0	0.0397548	0
1009	0.017416	0	0.0408922	0	0.0291541	0
1010	0.052248	0	0.0136307	0	0.0329394	0
1011	0	0	0	0	0	0
1012	0	0	0	0	0	0
1013	0	0	0	0	0	0
1014	0	0	0	0	0	0
1015	0	0	0	0	0	0
1016	0.017416	0	0	0	0.00870801	0
1017	0	0	0	0	0	0
1018	0.052248	0	0	0	0.026124	0
1019	0	0	0	0	0	0
1020	0	0	0	0	0	0
1021	0	0	0	0	0	0
1022	0	0	0	0	0	0
1023	0	0	0	0	0	0
1024	0	0	0	0	0	0
1025	0	0	0	0	0	0
1026	0	0	0	0	0	0
1027	0	0	0	0	0	0
1028	0	0	0	0	0	0
1029	0	0	0	0	0	0
1030	0	0	0	0	0	0
1031	0	0	0	0	0	0
1032	0	0	0	0	0	0
1033	0	0	0	0	0	0
1034	0	0	0	0	0	0
1035	0	0	0	0	0	0
1036	0	0	0	0	0	0
1037	0	0	0	0	0	0
1038	0	0	0	0	0	0
1039	0	0	0	0	0	0
1040	0	0	0	0	0	0
1041	0	0	0	0	0	0
1042	0	0	0	0	0	0
1043	0	0	0	0	0	0
1044	0	0	0	0	0	0
1045	0	0	0	0	0	0
1046	0	0	0	0	0	0
1047	0	0	0	0	0	0
1048	0	0	0	0	0	0
1049	0	0	0	0	0	0
1050	0	0	0	0	0	0
1051	0	0	0	0	0	0
1052	0	0	0	0	0	0
1053	0	0	0	0	0	0
1054	0	0	0	0	0	0
1055	0	0	0.0136307	0	0.00681537	0
1056	0	0	0	0	0	0
1057	0	0	0	0	0	0
1058	0	0	0	0	0	0
1059	0	0	0	0	0	0
1060	0	0	0	0	0	0
1061	0	0	0	0	0	0
1062	0	0	0	0	0	0
1063	0	0	0	0	0	0
1064	0	0	0	0	0	0
1065	0	0	0	0	0	0
1066	0	0	0	0	0	0
1067	0	0	0	0	0	0
1068	0	0	0	0	0	0
1069	0	0	0	0	0	0
1070	0	0	0	0	0	0
1071	0	0	0	0	0	0
1072	0	0	0	0	0	0
1073	0	0	0	0	0	0
1074	0	0	0	0	0	0
1075	0	0	0	0	0	0
1076	0	0	0	0	0	0
1077	0	0	0	-0.0136307	0	-0.00681537
1078	0	0	0	0	0	0
1079	0	0	0	0	0	0
1080	0	0	0	0	0	0
1081	0	0	0	0	0	0
1082	0	0	0	0	0	0
1083	0	0	0	0	0	0
1084	0	0	0	0	0	0
1085	0	0	0	0	0	0
1086	0	0	0	0	0	0
1087	0	0	0	0	0	0
1088	0	0	0	0	0	0
1089	0	0	0	0	0	0
1090	0	0	0	0	0	0
1091	0	0	0	0	0	0
1092	0	0	0	0	0	0
1093	0	0	0	0	0	0
1094	0	0	0	0	0	0
1095	0	0	0	0	0	0
1096	0	0	0	0	0	0
1097	0	0	0	0	0	0
1098	0	0	0	0	0	0
1099	0	0	0	0	0	0
1100	0.017416	-0.017416	0	-0.0408922	0.00870801	-0.0291541
1101	0	0	0	0	0	0
1102	0	-0.052248	0	-0.0545229	0	-0.0533855
1103	0	-0.017416	0	-0.0408922	0	-0.0291541
1104	0	-0.191576	0	-0.1772	0	-0.184388
1105	0	-0.191576	0	-0.531599	0	-0.361587
1106	0	-0.069664	0	-0.136307	0	-0.102986
1107	0	-0.069664	0.0136307	-0.0545229	0.00681537	-0.0620935
1108	0	-0.069664	0	-0.0272615	0	-0.0484628
1109	0	-0.539896	0	-0.517968	0	-0.528932
1110	0	-0.017416	0	-0.0272615	0	-0.0223387
1111	0	-0.17416	0	-0.122677	0	-0.148418
1112	0	-0.0870801	0	-0.109046	0	-0.098063
1113	0	-0.156744	0	-0.136307	0	-0.146526
1114	0	-0.0870801	0	-0.0136307	0	-0.0503554
1115	0	-0.940465	0	-0.858736	0	-0.8996
1116	0	-0.052248	0	-0.0545229	0	-0.0533855
1117	0	-0.069664	0	-0.0817844	0	-0.0757242
1118	0	-0.034832	0	-0.0954151	0	-0.0651236
1119	0	-0.243824	0	-0.258984	0	-0.251404
1120	0	-0.104496	0	-0.231722	0	-0.168109
1121	0	0	0	0	0	0
1122	0	-0.034832	0	-0.0545229	0	-0.0446775
1123	0	-0.069664	0	-0.0272615	0	-0.0484628
1124	0	-0.034832	0	-0.0272615	0	-0.0310467
1125	0	-0.017416	0	0	0	-0.00870801
1126	0	-0.191576	0	-0.272615	0	-0.232095
1127	0	-0.34832	0	-0.258984	0	-0.303652
1128	0	-0.017416	0	0	0	-0.00870801
1129	0	-0.888217	0	-1.10409	0	-0.996153
1130	0	0	0	-0.0681537	0	-0.0340768
1131	0	-0.0870801	0	-0.149938	0	-0.118509
1132	0	-0.034832	0	-0.0681537	0	-0.0514928
1133	0	0	0	0	0	0
1134	0	0	0	-0.0681537	0	-0.0340768
1135	0	0	0	0	0	0
1136	0	-0.034832	0	-0.0136307	0	-0.0242314
1137	0	-0.052248	0	-0.0136307	0	-0.0329394
1138	0	0	0	0	0	0
1139	0	-0.034832	0.0136307	-0.0136307	0.00681537	-0.0242314
1140	0	0	0	-0.0408922	0	-0.0204461
1141	0	-0.017416	0	-0.0817844	0	-0.0496002
1142	0	0	0	0	0	0
1143	0	-0.017416	0	-0.0272615	0	-0.0223387
1144	0	-0.034832	0	-0.163569	0	-0.0992004
1145	0	-0.017416	0	-0.0272615	0	-0.0223387
1146	0	-0.017416	0	-0.0136307	0	-0.0155234
1147	0	-0.017416	0	-0.0272615	0	-0.0223387
1148	0	0	0	-0.0136307	0	-0.00681537
1149	0	0	0	0	0	0
1150	0	0	0	-0.0272615	0	-0.0136307
1151	0	-0.034832	0	-0.136307	0	-0.0855697
1152	0	-0.052248	0	-0.0408922	0	-0.0465701
1153	0	-0.017416	0	-0.204461	0	-0.110939
1154	0	-0.104496	0	-0.0545229	0	-0.0795095
1155	0	-0.052248	0	-0.122677	0	-0.0874623
1156	0	0	0	-0.0408922	0	-0.0204461
1157	0	0	0	-0.0136307	0	-0.00681537
1158	0	-0.069664	0	-0.122677	0	-0.0961703
1159	0	-0.156744	0	-0.0545229	0	-0.105634
1160	0	-0.052248	0	0	0	-0.026124
1161	0	-0.243824	0	-0.0817844	0	-0.162804
1162	0	-0.226408	0	-0.0954151	0	-0.160912
1163	0	-1.75902	0	-1.82652	0	-1.79277
1164	0	-1.67194	0	-2.38538	0	-2.02866
1165	0	-0.17416	0	-0.313507	0	-0.243833
1166	0	-0.330904	0	-0.531599	0	-0.431251
1167	0	-0.296072	0	-0.258984	0	-0.277528
1168	0	-0.208992	0	-0.163569	0	-0.18628
1169	0.017416	-0.17416	0	-0.299876	0.00870801	-0.237018
1170	0	-0.034832	0	-0.0136307	0	-0.0242314
1171	0	-0.121912	0	-0.0545229	0	-0.0882175
1172	0	-0.0870801	0	-0.122677	0	-0.104878
1173	0	-0.104496	0	-0.0817844	0	-0.0931402
1174	0	0	0	-0.0408922	0	-0.0204461
1175	0	-0.052248	0	-0.0136307	0	-0.0329394
1176	0	-0.470232	0	-0.517968	0	-0.4941
1177	0	-0.226408	0	-0.258984	0	-0.242696
1178	0	0	0	0	0	0
1179	0	0	0	-0.0272615	0	-0.0136307
1180	0	-0.034832	0	-0.0408922	0	-0.0378621
1181	0	-0.034832	0	-0.0272615	0	-0.0310467
1182	0	0	0	-0.0272615	0	-0.0136307
1183	0	-0.034832	0	-0.109046	0	-0.0719389
1184	0	0	0	0	0	0
1185	0	0	0	0	0	0
1186	0	-0.017416	0	0	0	-0.00870801
1187	0	0	0	0	0	0
1188	0	0	0	-0.0408922	0	-0.0204461
1189	0	-0.052248	0	-0.0136307	0	-0.0329394
1190	0	0	0	0	0	0
1191	0	-0.017416	0	0	0	-0.00870801
1192	0	0	0	-0.0272615	0	-0.0136307
1193	0	-0.156744	0	-0.204461	0	-0.180603
1194	0	-0.0870801	0	-0.122677	0	-0.104878
1195	0	-0.017416	0	-0.0681537	0	-0.0427848
1196	0	-0.017416	0	-0.0272615	0	-0.0223387
1197	0	-0.034832	0	-0.0136307	0	-0.0242314
1198	0	-0.034832	0	-0.0408922	0	-0.0378621
1199	0	0	0	-0.0136307	0	-0.00681537
1200	0	0	0	-0.149938	0	-0.074969
1201	0	-0.034832	0	0	0	-0.017416
1202	0	0	0	-0.0545229	0	-0.0272615
1203	0	-0.017416	0	-0.0136307	0	-0.0155234
1204	0	-0.034832	0	-0.0408922	0	-0.0378621
1205	0	-0.052248	0	-0.0681537	0	-0.0602009
1206	0	-0.156744	0	-0.109046	0	-0.132895
1207	0	-0.208992	0	-0.613383	0	-0.411188
1208	0	-0.470232	0	-0.531599	0	-0.500915
1209	0	-0.017416	0	-0.0545229	0	-0.0359695
1210	0	-0.0870801	0	-0.122677	0	-0.104878
1211	0	0	0	0	0	0
1212	0	-0.034832	0	-0.0136307	0	-0.0242314
1213	0	-0.069664	0	-0.0408922	0	-0.0552781
1214	0.017416	-0.069664	0	-0.0408922	0.00870801	-0.0552781
1215	0	0	0	-0.0817844	0	-0.0408922
1216	0	0	0	-0.0136307	0	-0.00681537
1217	0	-0.121912	0	-0.36803	0	-0.244971
1218	0	-0.034832	0	-0.109046	0	-0.0719389
1219	0	-0.34832	0	-0.477076	0	-0.412698
1220	0	-0.017416	0	-0.0954151	0	-0.0564156
1221	0	-0.034832	0	-0.1772	0	-0.106016
1222	0	-0.052248	0	-0.231722	0	-0.141985
1223	0	0	0	-0.0272615	0	-0.0136307
1224	0	-0.104496	0	-0.0545229	0	-0.0795095
1225	0	-0.034832	0	-0.0136307	0	-0.0242314
1226	0	-0.156744	0	-0.354399	0	-0.255572
1227	0	-0.069664	0	-0.286245	0	-0.177955
1228	0	-0.121912	0	-0.218092	0	-0.170002
1229	0	-0.034832	0	-0.0272615	0	-0.0310467
1230	0	-0.017416	0	-0.109046	0	-0.0632309
1231	0	-0.034832	0	-0.0408922	0	-0.0378621
1232	0	-0.156744	0	-0.245353	0	-0.201049
1233	0	-0.60956	0	-0.831475	0	-0.720518
1234	0	-0.26124	0	-0.640644	0	-0.450942
1235	0	-0.626976	0	-1.1995	0	-0.91324
1236	0	-0.226408	0	-0.1772	0	-0.201804
1237	0	-0.470232	0	-0.640644	0	-0.555438
1238	0	-0.52248	0	-0.245353	0	-0.383917
1239	0	-0.121912	0	-0.258984	0	-0.190448
1240	0	0	0	-0.136307	0	-0.0681537
1241	0	-0.034832	0	-0.0545229	0	-0.0446775
1242	0	-0.017416	0	-0.0681537	0	-0.0427848
1243	0	-0.052248	0	-0.122677	0	-0.0874623
1244	0	0	0	-0.122677	0	-0.0613383
1245	0	-1.25395	0	-1.93556	0	-1.59476
1246	0.017416	-0.60956	0	-0.954151	0.00870801	-0.781856
1247	0	-1.09721	0	-1.81289	0	-1.45505
1248	0	-0.34832	0	-0.395291	0	-0.371806
1249	0	-0.26124	0	-0.258984	0	-0.260112
1250	0	-1.95059	0	-2.53532	0	-2.24295
1251	0	-0.156744	0	-0.163569	0	-0.160156
1252	0	-0.365736	0	-0.504337	0	-0.435037
1253	0	-0.278656	0	-0.73606	0	-0.507358
1254	0	-0.34832	0	-0.463445	0	-0.405883
1255	0	-0.104496	0	-0.19083	0	-0.147663
1256	0	-0.539896	0	-0.640644	0	-0.59027
1257	0.017416	-0.766305	0	-1.10409	0.00870801	-0.935197
1258	0	-1.55003	0	-2.54895	0	-2.04949
1259	0	-0.156744	0	-0.149938	0	-0.153341
1260	0	-0.557312	0	-0.790583	0	-0.673947
1261	0	-0.069664	0	-0.0817844	0	-0.0757242
1262	0	0	0	-0.0954151	0	-0.0477076
1263	0	-0.0870801	0	-0.258984	0	-0.173032
1264	0	-0.121912	0	-0.0408922	0	-0.0814021
1265	0	-0.330904	0	-0.327138	0	-0.329021
1266	0	-0.052248	0	-0.0136307	0	-0.0329394
1267	0	-0.226408	0	-0.286245	0	-0.256327
1268	0	-3.77927	0	-5.54771	0	-4.66349
1269	0	-0.383152	0	-0.327138	0	-0.355145
1270	0	-1.09721	0	-1.34944	0	-1.22333
1271	0	-0.923049	0	-0.776952	0	-0.85
1272	0	-0.34832	0	-0.19083	0	-0.269575
1273	0	-0.034832	0	-0.0681537	0	-0.0514928
1274	0	-0.156744	0	-0.149938	0	-0.153341
1275	0	-0.017416	0	-0.0817844	0	-0.0496002
1276	0	-1.4107	0	-1.52664	0	-1.46867
1277	0	-0.017416	0	-0.313507	0	-0.165461
1278	0	-0.121912	0	-0.122677	0	-0.122294
1279	0	-0.121912	0	-0.0681537	0	-0.0950329
1280	0	-0.017416	0	-0.0954151	0	-0.0564156
1281	0	-0.104496	0	-0.0545229	0	-0.0795095
1282	0	-0.208992	0	-0.204461	0	-0.206727
1283	0	-0.121912	0	-0.109046	0	-0.115479
1284	0	-0.0870801	0.0136307	-0.122677	0.00681537	-0.104878
1285	0	-0.17416	0	-0.463445	0	-0.318803
1286	0	-0.104496	0	-0.0954151	0	-0.0999556
1287	0	-0.156744	0	-0.286245	0	-0.221495
1288	0	-0.052248	0	-0.109046	0	-0.080647
1289	0	-0.296072	0	-0.55886	0	-0.427466
1290	0	-0.278656	0	-0.408922	0	-0.343789
1291	0	-0.69664	0	-1.2404	0	-0.968519
1292	0	-0.417984	0	-0.640644	0	-0.529314
1293	0	-0.191576	0	-0.258984	0	-0.22528
1294	0	-0.191576	0	-0.395291	0	-0.293434
1295	0	-0.069664	0	-0.122677	0	-0.0961703
1296	0	-0.121912	0	-0.272615	0	-0.197263
1297	0	-0.121912	0	-0.163569	0	-0.14274
1298	0	-0.383152	0	-0.831475	0	-0.607314
1299	0	-0.069664	0	-0.0681537	0	-0.0689089
1300	0	-0.121912	0	-0.163569	0	-0.14274
1301	0	-0.26124	0	-0.272615	0	-0.266927
1302	0.017416	-0.26124	0.0136307	-0.340768	0.0155234	-0.301004
1303	0	-1.32362	0	-1.99009	0	-1.65685
1304	0.017416	-0.940465	0	-1.40397	0.00870801	-1.17222
1305	0	-0.940465	0	-1.43123	0	-1.18585
1306	0	-0.661808	0.0136307	-1.26766	0.00681537	-0.964733
1307	0	-0.365736	0	-0.654275	0	-0.510006
1308	0	-0.330904	0	-0.354399	0	-0.342652
1309	0	-0.052248	0	-0.19083	0	-0.121539
1310	0	-0.121912	0	-0.0545229	0	-0.0882175
1311	0	-0.121912	0	-0.422553	0	-0.272232
1312	0	-0.313488	0	-0.381661	0	-0.347574
1313	0	-0.156744	0	-0.109046	0	-0.132895
1314	0	-0.452816	0	-0.654275	0	-0.553546
1315	0	-0.644392	0	-1.14498	0	-0.894687
1316	0	-0.313488	0	-0.517968	0	-0.415728
1317	0	-0.121912	0	-0.381661	0	-0.251786
1318	0	-1.55003	0	-1.82652	0	-1.68827
1319	0	-0.208992	0	-0.340768	0	-0.27488
1320	0	0	0	-0.231722	0	-0.115861
1321	0	-0.644392	0	-0.940521	0	-0.792457
1322	0	-0.104496	0	-0.0545229	0	-0.0795095
1323	0	-0.156744	0	-0.204461	0	-0.180603
1324	0	-0.592144	0	-0.74969	0	-0.670917
1325	0	-0.243824	0	-0.477076	0	-0.36045
1326	0	-0.661808	0	-0.490706	0	-0.576257
1327	0.017416	-4.65008	0	-5.26146	0.00870801	-4.95577
1328	0	-0.017416	0	-0.0545229	0	-0.0359695
1329	0	-0.365736	0	-0.517968	0	-0.441852
1330	0	-0.17416	0	-0.272615	0	-0.223387
1331	0	0	0	-0.0545229	0	-0.0272615
1332	0	-0.296072	0	-0.381661	0	-0.338866
1333	0	-0.400568	0	-0.299876	0	-0.350222
1334	0	-0.278656	0	-0.463445	0	-0.371051
1335	0	-0.801137	0.0136307	-1.04957	0.00681537	-0.925352
1336	0	-0.17416	0	-0.136307	0	-0.155234
1337	0	-0.330904	0	-0.36803	0	-0.349467
1338	0	-1.46295	0	-1.62206	0	-1.5425
1339	0	-0.835969	0	-0.708798	0	-0.772383
1340	0	-0.0870801	0	-0.1772	0	-0.13214
1341	0	-0.226408	0	-0.19083	0	-0.208619
1342	0	-0.26124	0.0136307	-0.381661	0.00681537	-0.32145
1343	0	-0.52248	0	-0.504337	0	-0.513409
1344	0	-0.26124	0.0272615	-0.395291	0.0136307	-0.328266
1345	0	-0.60956	0	-1.04957	0	-0.829563
1346	0	-0.313488	0	-0.531599	0	-0.422543
1347	0	-0.278656	0	-0.340768	0	-0.309712
1348	0	-0.330904	0	-0.395291	0	-0.363098
1349	0	-0.0870801	0	-0.0817844	0	-0.0844322
1350	0	-0.278656	0	-0.231722	0	-0.255189
1351	0	-0.104496	0	-0.0545229	0	-0.0795095
1352	0	-0.121912	0	-0.0817844	0	-0.101848
1353	0	-0.104496	0	-0.0817844	0	-0.0931402
1354	0	-2.49049	0.0272615	-3.23048	0.0136307	-2.86049
1355	0	-0.104496	0	-0.0408922	0	-0.0726941
1356	0	-0.452816	0	-0.613383	0	-0.5331
1357	0	-0.539896	0	-0.872367	0	-0.706132
1358	0	-0.104496	0	-0.0954151	0	-0.0999556
1359	0	-1.35845	0.0136307	-1.09046	0.00681537	-1.22445
1360	0	-3.93602	0	-3.66667	0	-3.80134
1361	0	0	0	-0.0272615	0	-0.0136307
1362	0	-0.17416	0	-0.572491	0	-0.373325
1363	0	-1.67194	0	-1.51301	0	-1.59247
1364	0	-0.330904	0	-0.640644	0	-0.485774
1365	0	-0.835969	0	-0.681537	0	-0.758753
1366	0	-0.557312	0	-0.449814	0	-0.503563
1367	0	-0.069664	0	-0.149938	0	-0.109801
1368	0	-0.0870801	0	-0.122677	0	-0.104878
1369	0	-0.156744	0	-0.258984	0	-0.207864
1370	0	-0.505064	0	-0.477076	0	-0.49107
1371	0	-1.14946	0	-1.33581	0	-1.24263
1372	0	0	0	-0.122677	0	-0.0613383
1373	0	-0.801137	0	-0.586122	0	-0.693629
1374	0	-0.905633	0	-1.2404	0	-1.07301
1375	0	-0.69664	0	-0.913259	0	-0.80495
1376	0.017416	-0.975297	0.0136307	-0.954151	0.0155234	-0.964724
1377	0	-0.52248	0	-0.74969	0	-0.636085
1378	0	-0.069664	0	-0.163569	0	-0.116616
1379	0	-0.313488	0	-0.477076	0	-0.395282
1380	0	-0.592144	0	-0.381661	0	-0.486902
1381	0	-0.452816	0	-0.599752	0	-0.526284
1382	0	-0.592144	0	-0.490706	0	-0.541425
1383	0	-0.0870801	0	-0.245353	0	-0.166217
1384	0	-0.505064	0	-0.504337	0	-0.504701
1385	0	-0.121912	0	-0.258984	0	-0.190448
1386	0.052248	-1.53261	0	-2.04461	0.026124	-1.78861
1387	0	-2.05509	0.0272615	-2.07187	0.0136307	-2.06348
1388	0	-0.069664	0	-0.0954151	0	-0.0825396
1389	0	-0.487648	0	-0.681537	0	-0.584593
1390	0	-0.139328	0	-0.0681537	0	-0.103741
1391	0	-1.32362	0	-1.32218	0	-1.3229
1392	0	-0.017416	0	-0.0136307	0	-0.0155234
1393	0	0	0	-0.0817844	0	-0.0408922
1394	0	-0.296072	0	-0.477076	0	-0.386574
1395	0	-0.626976	0	-0.586122	0	-0.606549
1396	0	-0.470232	0	-0.463445	0	-0.466839
1397	0	-0.52248	0.0136307	-0.776952	0.00681537	-0.649716
1398	0	-0.156744	0	-0.136307	0	-0.146526
1399	0	-0.156744	0	-0.136307	0	-0.146526
1400	0	-0.487648	0	-0.354399	0	-0.421024
1401	0	-0.017416	0	0	0	-0.00870801
1402	0	-0.748889	0	-0.477076	0	-0.612982
1403	0	-0.487648	0	-0.545229	0	-0.516439
1404	0	-0.052248	0	-0.136307	0	-0.0942777
1405	0	-0.0870801	0	-0.136307	0	-0.111694
1406	0	-0.0870801	0	-0.204461	0	-0.145771
1407	0	-0.505064	0	-0.885998	0	-0.695531
1408	0	-0.278656	0	-0.395291	0	-0.336974
1409	0	-0.296072	0	-0.627014	0	-0.461543
1410	0	-0.052248	0	-0.0272615	0	-0.0397548
1411	0	-0.017416	0	-0.0681537	0	-0.0427848
1412	0.017416	-0.069664	0	-0.0954151	0.00870801	-0.0825396
1413	0	-0.470232	0	-0.640644	0	-0.555438
1414	0	-0.121912	0	-0.0136307	0	-0.0677714
1415	0	-0.0870801	0	-0.109046	0	-0.098063
1416	0	-0.069664	0	-0.245353	0	-0.157509
1417	0	-0.052248	0	0	0	-0.026124
1418	0	-0.313488	0	-0.422553	0	-0.36802
1419	0	-1.88093	0	-2.0855	0	-1.98322
1420	0	-0.417984	0	-0.490706	0	-0.454345
1421	0	-0.104496	0	-0.149938	0	-0.127217
1422	0	-1.07979	0	-1.94919	0	-1.51449
1423	0	-1.25395	0	-1.22677	0	-1.24036
1424	0	-0.330904	0	-0.231722	0	-0.281313
1425	0	-0.313488	0	-0.327138	0	-0.320313
1426	0	-0.139328	0	-0.286245	0	-0.212787
1427	0	-0.069664	0	-0.136307	0	-0.102986
1428	0	-0.0870801	0	-0.163569	0	-0.125324
1429	0	-0.121912	0	-0.136307	0	-0.12911
1430	0	-0.139328	0	-0.313507	0	-0.226417
1431	0	-0.034832	0	-0.0545229	0	-0.0446775
1432	0.034832	-0.313488	0	-0.55886	0.017416	-0.436174
1433	0	-1.27137	0	-2.2627	0	-1.76704
1434	0	-1.8461	0.0136307	-2.99876	0.00681537	-2.42243
1435	0	-4.00568	0	-4.00744	0	-4.00656
1436	0	-0.4354	0	-0.73606	0	-0.58573
1437	0	-0.0870801	0	-0.149938	0	-0.118509
1438	0	-0.574728	0	-0.463445	0	-0.519087
1439	0	-0.574728	0	-0.790583	0	-0.682655
1440	0	-0.731473	0.0272615	-0.981413	0.0136307	-0.856443
1441	0	-0.243824	0.0136307	-0.408922	0.00681537	-0.326373
1442	0	-0.156744	0	-0.0954151	0	-0.12608
1443	0	-0.487648	0	-0.804213	0	-0.645931
1444	0	-0.17416	0	-0.163569	0	-0.168864
1445	0	-0.17416	0	-0.163569	0	-0.168864
1446	0	-0.208992	0	-0.327138	0	-0.268065
1447	0	-0.296072	0	-0.272615	0	-0.284343
1448	0	-0.278656	0	-0.313507	0	-0.296082
1449	0	-0.731473	0	-0.92689	0	-0.829181
1450	0	-0.069664	0	-0.0817844	0	-0.0757242
1451	0	-0.34832	0	-0.36803	0	-0.358175
1452	0	-0.208992	0	-0.0681537	0	-0.138573
1453	0	-0.400568	0	-0.73606	0	-0.568314
1454	0	-0.731473	0	-0.872367	0	-0.80192
1455	0	-0.17416	0	-0.436183	0	-0.305172
1456	0	-0.0870801	0	-0.1772	0	-0.13214
1457	0	-0.644392	0	-0.531599	0	-0.587996
1458	0	-0.278656	0	-0.613383	0	-0.44602
1459	0	-0.156744	0	-0.517968	0	-0.337356
1460	0	-0.34832	0	-0.640644	0	-0.494482
1461	0	-0.226408	0	-0.408922	0	-0.317665
1462	0	-0.052248	0	-0.340768	0	-0.196508
1463	0	-0.731473	0	-0.954151	0	-0.842812
1464	0	-0.365736	0	-0.395291	0	-0.380514
1465	0	-0.104496	0	-0.245353	0	-0.174925
1466	0	-0.470232	0	-0.995044	0	-0.732638
1467	0	-1.35845	0	-1.58117	0	-1.46981
1468	0.034832	-2.15959	0.0272615	-1.9083	0.0310467	-2.03394
1469	0	-1.42811	0	-1.44486	0	-1.43649
1470	0	-0.714056	0	-0.804213	0	-0.759135
1471	0	-0.243824	0	-0.313507	0	-0.278666
1472	0	-1.39328	0.0136307	-1.15861	0.00681537	-1.27595
1473	0	-0.226408	0	-0.299876	0	-0.263142
1474	0	-1.14946	0	-0.763321	0	-0.956389
1475	0	-0.731473	0	-1.1995	0	-0.965489
1476	0	-0.452816	0	-0.449814	0	-0.451315
1477	0	-0.835969	0	-0.831475	0	-0.833722
1478	0	-0.313488	0	-0.504337	0	-0.408913
1479	0	-0.104496	0	-0.149938	0	-0.127217
1480	0	-0.226408	0	-0.19083	0	-0.208619
1481	0	-0.069664	0	-0.231722	0	-0.150693
1482	0	-0.452816	0	-0.763321	0	-0.608069
1483	0.034832	-1.35845	0	-1.94919	0.017416	-1.65382
1484	0	-0.191576	0	-0.1772	0	-0.184388
1485	0	-0.069664	0	-0.231722	0	-0.150693
1486	0	-0.296072	0	-0.449814	0	-0.372943
1487	0	-0.870801	0	-0.885998	0	-0.878399
1488	0	-0.400568	0	-0.272615	0	-0.336591
1489	0	-0.383152	0	-0.681537	0	-0.532344
1490	0	-3.06522	0	-2.49442	0	-2.77982
1491	0	-0.121912	0	-0.19083	0	-0.156371
1492	0	-0.34832	0	-0.218092	0	-0.283206
1493	0	-0.60956	0	-0.790583	0	-0.700071
1494	0	-0.748889	0	-0.885998	0	-0.817443
1495	0	-0.69664	0	-0.831475	0	-0.764058
1496	0	-0.835969	0	-0.790583	0	-0.813276
1497	0	-0.052248	0	-0.0817844	0	-0.0670162
1498	0	-0.400568	0	-0.490706	0	-0.445637
1499	0	-0.208992	0.0136307	-0.19083	0.00681537	-0.199911
1500	0	-0.539896	0	-0.463445	0	-0.501671
1501	0	-0.505064	0.0136307	-0.73606	0.00681537	-0.620562
1502	0	-0.679224	0	-0.327138	0	-0.503181
1503	0	-0.923049	0	-0.845105	0	-0.884077
1504	0	-0.557312	0	-0.763321	0	-0.660317
1505	0	-0.487648	0	-0.490706	0	-0.489177
1506	0	-0.296072	0	-0.55886	0	-0.427466
1507	0	-0.714056	0	-0.74969	0	-0.731873
1508	0	-0.34832	0	-0.395291	0	-0.371806
1509	0	-0.801137	0	-0.913259	0	-0.857198
1510	0	-1.39328	0	-0.913259	0	-1.15327
1511	0	-0.52248	0	-0.504337	0	-0.513409
1512	0	-0.104496	0	-0.272615	0	-0.188555
1513	0	-0.191576	0	-0.449814	0	-0.320695
1514	0	-0.017416	0	-0.149938	0	-0.083677
1515	0	-0.470232	0	-0.395291	0	-0.432762
1516	0	-0.26124	0	-0.299876	0	-0.280558
1517	0	-0.870801	0.0136307	-0.995044	0.00681537	-0.932922
1518	0	-0.783721	0	-1.13135	0	-0.957536
1519	0	-0.104496	0	-0.0681537	0	-0.0863249
1520	0	-0.505064	0	-0.790583	0	-0.647823
1521	0	-0.905633	0	-0.74969	0	-0.827661
1522	0	-0.139328	0	-0.0817844	0	-0.110556
1523	0	-0.313488	0	-0.163569	0	-0.238529
1524	0	-0.208992	0	-0.218092	0	-0.213542
1525	0	-0.052248	0	-0.0408922	0	-0.0465701
1526	0	-0.226408	0	-0.231722	0	-0.229065
1527	0	-0.313488	0	-0.449814	0	-0.381651
1528	0	-0.26124	0	-0.695167	0	-0.478204
1529	0	-0.17416	0	-0.149938	0	-0.162049
1530	0	-0.034832	0	-0.1772	0	-0.106016
1531	0	-0.156744	0	-0.299876	0	-0.22831
1532	0	-0.957881	0.0136307	-0.790583	0.00681537	-0.874232
1533	0	-0.069664	0	-0.0954151	0	-0.0825396
1534	0	-0.748889	0	-0.899628	0	-0.824258
1535	0	-0.487648	0	-0.231722	0	-0.359685
1536	0	-0.139328	0	-0.19083	0	-0.165079
1537	0	-0.679224	0	-1.07683	0	-0.878026
1538	0	-0.208992	0	-0.272615	0	-0.240803
1539	0	-1.35845	0	-2.31722	0	-1.83784
1540	0	-0.069664	0	-0.0272615	0	-0.0484628
1541	0	-1.13204	0	-1.40397	0	-1.268
1542	0	-0.644392	0	-1.10409	0	-0.874241
1543	0	-0.330904	0	-0.245353	0	-0.288129
1544	0	-0.139328	0	-0.231722	0	-0.185525
1545	0	-0.539896	0	-0.545229	0	-0.542563
1546	0	-3.55287	0	-3.76208	0	-3.65747
1547	0	-0.957881	0	-1.18587	0	-1.07188
1548	0	-0.069664	0	-0.1772	0	-0.123432
1549	0	-0.69664	0	-0.804213	0	-0.750427
1550	0	-0.313488	0	-0.517968	0	-0.415728
1551	0	-0.278656	0	-0.36803	0	-0.323343
1552	0	-0.121912	0	-0.313507	0	-0.217709
1553	0	-0.069664	0	-0.0954151	0	-0.0825396
1554	0	-0.191576	0	-0.258984	0	-0.22528
1555	0	-0.835969	0.0136307	-0.872367	0.00681537	-0.854168
1556	0	0	0	-0.0136307	0	-0.00681537
1557	0	-0.052248	0	-0.0954151	0	-0.0738316
1558	0	-0.069664	0	-0.136307	0	-0.102986
1559	0	-0.034832	0	-0.0817844	0	-0.0583082
1560	0	-0.278656	0	-0.0817844	0	-0.18022
1561	0	-0.069664	0	-0.109046	0	-0.089355
1562	0	-0.574728	0	-0.708798	0	-0.641763
1563	0	-0.069664	0	-0.0272615	0	-0.0484628
1564	0	-0.0870801	0	-0.204461	0	-0.145771
1565	0	-0.679224	0	-0.858736	0	-0.76898
1566	0	-0.470232	0	-0.504337	0	-0.487285
1567	0	-0.452816	0	-0.408922	0	-0.430869
1568	0	-0.052248	0	-0.0136307	0	-0.0329394
1569	0	-0.156744	0	-0.436183	0	-0.296464
1570	0	-0.034832	0	-0.0681537	0	-0.0514928
1571	0	-0.139328	0.0272615	-0.204461	0.0136307	-0.171895
1572	0	-0.034832	0	-0.0272615	0	-0.0310467
1573	0	-0.017416	0.0272615	-0.0408922	0.0136307	-0.0291541
1574	0	-0.052248	0.0136307	-0.0545229	0.00681537	-0.0533855
1575	0	-0.0870801	0	-0.286245	0	-0.186663
1576	0.017416	-0.4354	0	-0.313507	0.00870801	-0.374454
1577	0	-0.208992	0	-0.286245	0	-0.247619
1578	0	-0.243824	0	-0.408922	0	-0.326373
1579	0	-0.156744	0	-0.204461	0	-0.180603
1580	0	-0.557312	0	-0.449814	0	-0.503563
1581	0	-0.208992	0	-0.1772	0	-0.193096
1582	0	-0.783721	0	-0.858736	0	-0.821228
1583	0	-0.139328	0	-0.286245	0	-0.212787
1584	0	0	0	0	0	0
1585	0	-0.052248	0	-0.109046	0	-0.080647
1586	0	-0.0870801	0	-0.0272615	0	-0.0571708
1587	0	-0.34832	0	-0.545229	0	-0.446775
1588	0	-0.400568	0	-0.422553	0	-0.411561
1589	0	-0.313488	0	-0.422553	0	-0.36802
1590	0	0	0	-0.0136307	0	-0.00681537
1591	0	-0.104496	0	-0.0681537	0	-0.0863249
1592	0	-0.052248	0	-0.0408922	0	-0.0465701
1593	0	0	0	-0.0272615	0	-0.0136307
1594	0	-0.313488	0	-0.463445	0	-0.388467
1595	0	0	0	-0.0408922	0	-0.0204461
1596	0	-0.121912	0	-0.258984	0	-0.190448
1597	0	-0.574728	0	-0.449814	0	-0.512271
1598	0	-0.156744	0	-0.149938	0	-0.153341
1599	0	-0.0870801	0	-0.272615	0	-0.179847
1600	0	-0.26124	0.0272615	-0.258984	0.0136307	-0.260112
1601	0	-0.156744	0	-0.313507	0	-0.235125
1602	0	-0.0870801	0	-0.1772	0	-0.13214
1603	0	-0.156744	0	-0.218092	0	-0.187418
1604	0.017416	-1.2017	0	-1.1995	0.00870801	-1.2006
1605	0	-0.052248	0	-0.136307	0	-0.0942777
1606	0	-0.296072	0	-0.395291	0	-0.345682
1607	0	-0.365736	0	-0.504337	0	-0.435037
1608	0	-0.26124	0.0136307	-0.218092	0.00681537	-0.239666
1609	0	-0.121912	0	-0.0408922	0	-0.0814021
1610	0	-0.121912	0	-0.381661	0	-0.251786
1611	0.017416	-0.139328	0	-0.1772	0.00870801	-0.158264
1612	0	-0.104496	0	-0.149938	0	-0.127217
1613	0	-0.0870801	0	-0.0136307	0	-0.0503554
1614	0	-0.017416	0	0	0	-0.00870801
1615	0	-0.069664	0	-0.0817844	0	-0.0757242
1616	0	-0.330904	0	-0.163569	0	-0.247237
1617	0.017416	-0.417984	0	-0.408922	0.00870801	-0.413453
1618	0	-0.121912	0	-0.204461	0	-0.163187
1619	0	-0.139328	0	-0.136307	0	-0.137818
1620	0	-0.313488	0	-0.422553	0	-0.36802
1621	0	-0.0870801	0	-0.122677	0	-0.104878
1622	0	-0.017416	0	-0.0272615	0	-0.0223387
1623	0	-0.052248	0	-0.0272615	0	-0.0397548
1624	0	0	0	-0.0408922	0	-0.0204461
1625	0	-0.017416	0	-0.0408922	0	-0.0291541
1626	0	-0.052248	0	-0.0136307	0	-0.0329394
1627	0	-0.383152	0	-0.327138	0	-0.355145
1628	0	-0.052248	0	-0.0136307	0	-0.0329394
1629	0	-0.17416	0	-0.1772	0	-0.17568
1630	0	-0.557312	0	-0.504337	0	-0.530825
1631	0	-0.156744	0.0136307	-0.1772	0.00681537	-0.166972
1632	0	-0.104496	0	-0.163569	0	-0.134032
1633	0	-0.069664	0	-0.0136307	0	-0.0416474
1634	0	-0.26124	0	-0.19083	0	-0.226035
1635	0	-0.052248	0	-0.0408922	0	-0.0465701
1636	0	0	0	-0.0136307	0	-0.00681537
1637	0	-0.017416	0	-0.0272615	0	-0.0223387
1638	0	-0.121912	0	-0.0817844	0	-0.101848
1639	0	-0.226408	0	-0.422553	0	-0.32448
1640	0	-0.243824	0	-0.204461	0	-0.224143
1641	0	-0.017416	0	-0.0408922	0	-0.0291541
1642	0	-0.243824	0	-0.408922	0	-0.326373
1643	0	-0.069664	0	-0.109046	0	-0.089355
1644	0	-0.069664	0	-0.109046	0	-0.089355
1645	0	-0.156744	0	-0.327138	0	-0.241941
1646	0	-0.139328	0	-0.19083	0	-0.165079
1647	0	-0.017416	0	-0.0272615	0	-0.0223387
1648	0	0	0	-0.0408922	0	-0.0204461
1649	0	-0.069664	0	-0.0408922	0	-0.0552781
1650	0	-0.121912	0	-0.245353	0	-0.183633
1651	0	-0.17416	0	-0.0954151	0	-0.134788
1652	0	-0.121912	0	-0.258984	0	-0.190448
1653	0	-0.0870801	0	-0.149938	0	-0.118509
1654	0	-0.052248	0	-0.0136307	0	-0.0329394
1655	0	-0.156744	0	-0.19083	0	-0.173787
1656	0	-0.470232	0	-0.613383	0	-0.541808
1657	0	-0.104496	0	-0.0681537	0	-0.0863249
1658	0	0	0	0	0	0
1659	0	-0.034832	0	-0.0545229	0	-0.0446775
1660	0	-0.208992	0	-0.231722	0	-0.220357
1661	0	-0.296072	0	-0.149938	0	-0.223005
1662	0	-0.104496	0.0136307	-0.313507	0.00681537	-0.209001
1663	0	-0.104496	0	-0.0954151	0	-0.0999556
1664	0	-0.0870801	0	0	0	-0.04354
1665	0	-0.121912	0	-0.149938	0	-0.135925
1666	0	0	0	-0.163569	0	-0.0817844
1667	0	0	0	-0.0545229	0	-0.0272615
1668	0	0	0	-0.0272615	0	-0.0136307
1669	0	-0.069664	0	-0.136307	0	-0.102986
1670	0	-0.17416	0	-0.163569	0	-0.168864
1671	0	-0.052248	0	-0.122677	0	-0.0874623
1672	0	-0.104496	0	-0.149938	0	-0.127217
1673	0	-0.104496	0	-0.149938	0	-0.127217
1674	0	-0.365736	0	-0.313507	0	-0.339622
1675	0	-0.17416	0	-0.245353	0	-0.209757
1676	0	-0.330904	0	-0.531599	0	-0.431251
1677	0	-0.0870801	0	-0.136307	0	-0.111694
1678	0	-0.139328	0	-0.0545229	0	-0.0969255
1679	0	-0.0870801	0	-0.136307	0	-0.111694
1680	0	-0.017416	0	-0.272615	0	-0.145015
1681	0	-0.992713	0	-1.9083	0	-1.45051
1682	0	-0.156744	0	-0.313507	0	-0.235125
1683	0	-0.104496	0	-0.0136307	0	-0.0590634
1684	0	-0.034832	0	-0.0408922	0	-0.0378621
1685	0	-0.226408	0	-0.354399	0	-0.290404
1686	0	-0.313488	0.0136307	-0.667906	0.00681537	-0.490697
1687	0	-0.226408	0	-0.449814	0	-0.338111
1688	0	-0.104496	0	-0.0681537	0	-0.0863249
1689	0	-0.139328	0	-0.149938	0	-0.144633
1690	0	-0.121912	0	-0.0817844	0	-0.101848
1691	0	-0.26124	0	-0.19083	0	-0.226035
1692	0	0	0.0136307	0	0.00681537	0
1693	0	-0.052248	0.0136307	-0.0408922	0.00681537	-0.0465701
1694	0	0	0	-0.0408922	0	-0.0204461
1695	0	0	0	-0.0272615	0	-0.0136307
1696	0	-0.034832	0	-0.0136307	0	-0.0242314
1697	0	-0.034832	0	-0.0408922	0	-0.0378621
1698	0	-0.208992	0.0681537	-0.0817844	0.0340768	-0.145388
1699	0	-0.052248	0	-0.0136307	0	-0.0329394
1700	0	-0.0870801	0	0	0	-0.04354
1701	0	-0.052248	0	-0.0136307	0	-0.0329394
1702	0	-0.069664	0	-0.0136307	0	-0.0416474
1703	0	-0.104496	0.0136307	-0.0817844	0.00681537	-0.0931402
1704	0	0	0	-0.0272615	0	-0.0136307
1705	0	-0.069664	0	-0.163569	0	-0.116616
1706	0	0	0	-0.0545229	0	-0.0272615
1707	0	-0.104496	0	-0.231722	0	-0.168109
1708	0	-0.104496	0	-0.1772	0	-0.140848
1709	0	-0.069664	0.0136307	-0.0681537	0.00681537	-0.0689089
1710	0	-0.017416	0	-0.0272615	0	-0.0223387
1711	0	0	0	0	0	0
1712	0	0	0	-0.0136307	0	-0.00681537
1713	0	-0.139328	0	-0.0817844	0	-0.110556
1714	0	0	0	-0.0817844	0	-0.0408922
1715	0	-0.069664	0	-0.0136307	0	-0.0416474
1716	0	-0.139328	0	-0.0136307	0	-0.0764794
1717	0	-0.0870801	0	-0.1772	0	-0.13214
1718	0	-0.069664	0	-0.1772	0	-0.123432
1719	0	-0.017416	0	-0.0136307	0	-0.0155234
1720	0	-0.017416	0	-0.0408922	0	-0.0291541
1721	0	-0.034832	0	-0.0545229	0	-0.0446775
1722	0	-0.034832	0	0	0	-0.017416
1723	0	-0.052248	0	-0.0545229	0	-0.0533855
1724	0	-0.017416	0	-0.0136307	0	-0.0155234
1725	0	0	0.0272615	0	0.0136307	0
1726	0	-0.034832	0.0136307	-0.0408922	0.00681537	-0.0378621
1727	0.017416	-0.034832	0	0	0.00870801	-0.017416
1728	0.017416	-0.17416	0.0272615	-0.122677	0.0223387	-0.148418
1729	0	0	0	-0.0136307	0	-0.00681537
1730	0	-0.034832	0	-0.0545229	0	-0.0446775
1731	0	0	0	-0.0545229	0	-0.0272615
1732	0	0	0.0272615	0	0.0136307	0
1733	0	0	0	0	0	0
1734	0	0	0	-0.0136307	0	-0.00681537
1735	0	-0.034832	0	0	0	-0.017416
1736	0	-0.052248	0	-0.0408922	0	-0.0465701
1737	0	-0.243824	0	-0.0954151	0	-0.16962
1738	0	-0.017416	0	-0.0136307	0	-0.0155234
1739	0	-0.278656	0	-0.122677	0	-0.200666
1740	0	0	0	-0.0136307	0	-0.00681537
1741	0	-0.052248	0	-0.0681537	0	-0.0602009
1742	0	-0.017416	0	-0.0136307	0	-0.0155234
1743	0	-0.0870801	0	-0.0681537	0	-0.0776169
1744	0	-0.034832	0	-0.0136307	0	-0.0242314
1745	0	-0.052248	0	-0.0272615	0	-0.0397548
1746	0	-0.121912	0	-0.0136307	0	-0.0677714
1747	0	0	0	-0.0136307	0	-0.00681537
1748	0	-0.052248	0	-0.163569	0	-0.107908
1749	0	-0.17416	0	-0.109046	0	-0.141603
1750	0.034832	-0.017416	0.0136307	-0.0681537	0.0242314	-0.0427848
1751	0	0	0	-0.0136307	0	-0.00681537
1752	0	-0.052248	0	-0.0681537	0	-0.0602009
1753	0	-0.0870801	0	-0.122677	0	-0.104878
1754	0	-0.156744	0	-0.0817844	0	-0.119264
1755	0	-0.034832	0	-0.0681537	0	-0.0514928
1756	0	-0.052248	0	-0.0817844	0	-0.0670162
1757	0	-0.052248	0	-0.0681537	0	-0.0602009
1758	0	-0.400568	0	-0.545229	0	-0.472899
1759	0	-0.26124	0	-0.258984	0	-0.260112
1760	0	-0.121912	0	-0.122677	0	-0.122294
1761	0	-0.069664	0	-0.0545229	0	-0.0620935
1762	0	0	0	0	0	0
1763	0	-0.052248	0	-0.136307	0	-0.0942777
1764	0	-0.034832	0	-0.0817844	0	-0.0583082
1765	0	0	0	0	0	0
1766	0	-0.069664	0	-0.0136307	0	-0.0416474
1767	0	0	0	-0.0408922	0	-0.0204461
1768	0	-0.226408	0	-0.204461	0	-0.215435
1769	0	-0.208992	0	-0.354399	0	-0.281696
1770	0	-0.539896	0	-0.73606	0	-0.637978
1771	0	-0.017416	0	0	0	-0.00870801
1772	0	-0.156744	0	-0.0408922	0	-0.0988182
1773	0	-0.156744	0	-0.122677	0	-0.13971
1774	0	-0.104496	0	-0.0817844	0	-0.0931402
1775	0	-0.17416	0	-0.109046	0	-0.141603
1776	0	-0.104496	0	-0.231722	0	-0.168109
1777	0	-0.052248	0	0	0	-0.026124
1778	0	-0.226408	0	-0.1772	0	-0.201804
1779	0	-0.017416	0	-0.0408922	0	-0.0291541
1780	0	-0.139328	0	-0.163569	0	-0.151448
1781	0	-0.017416	0	-0.0136307	0	-0.0155234
1782	0	-0.208992	0.0136307	-0.1772	0.00681537	-0.193096
1783	0	-0.017416	0	-0.0272615	0	-0.0223387
1784	0	0	0	0	0	0
1785	0	-0.156744	0	-0.0954151	0	-0.12608
1786	0	-0.139328	0	-0.272615	0	-0.205971
1787	0	0	0	-0.0272615	0	-0.0136307
1788	0	-0.052248	0.0136307	-0.0545229	0.00681537	-0.0533855
1789	0	-0.034832	0	0	0	-0.017416
1790	0	0	0	-0.0272615	0	-0.0136307
1791	0	-0.0870801	0	-0.0408922	0	-0.0639861
1792	0	-0.121912	0	-0.0681537	0	-0.0950329
1793	0	-0.243824	0	-0.122677	0	-0.18325
1794	0	-0.17416	0	-0.245353	0	-0.209757
1795	0.017416	-0.26124	0	-0.0954151	0.00870801	-0.178328
1796	0	0	0	-0.0681537	0	-0.0340768
1797	0	-0.156744	0	-0.395291	0	-0.276018
1798	0	-0.017416	0.0136307	-0.109046	0.00681537	-0.0632309
1799	0	-0.034832	0	-0.109046	0	-0.0719389
1800	0.034832	-0.052248	0	-0.0408922	0.017416	-0.0465701
1801	0	-0.034832	0	-0.0272615	0	-0.0310467
1802	0	-0.017416	0	-0.0136307	0	-0.0155234
1803	0	-0.017416	0	0	0	-0.00870801
1804	0	0	0	-0.0136307	0	-0.00681537
1805	0.017416	-0.191576	0.0136307	-0.36803	0.0155234	-0.279803
1806	0	-0.034832	0.0136307	-0.0681537	0.00681537	-0.0514928
1807	0	-0.034832	0	-0.0272615	0	-0.0310467
1808	0	-0.017416	0	0	0	-0.00870801
1809	0	0	0	-0.0136307	0	-0.00681537
1810	0	-0.017416	0	-0.109046	0	-0.0632309
1811	0	0	0	-0.0954151	0	-0.0477076
1812	0	-0.139328	0	-0.0272615	0	-0.0832948
1813	0	-0.017416	0	0	0	-0.00870801
1814	0	-0.104496	0	-0.0136307	0	-0.0590634
1815	0	0	0	-0.0136307	0	-0.00681537
1816	0	-0.034832	0	0	0	-0.017416
1817	0	-0.034832	0	0	0	-0.017416
1818	0	-0.017416	0	0	0	-0.00870801
1819	0	0	0	0	0	0
1820	0	-0.052248	0	-0.0272615	0	-0.0397548
1821	0	-0.017416	0	0	0	-0.00870801
1822	0	-0.017416	0	0	0	-0.00870801
1823	0	-0.052248	0	0	0	-0.026124
1824	0	0	0	-0.0136307	0	-0.00681537
1825	0	-0.0870801	0	-0.0545229	0	-0.0708015
1826	0	0	0	0	0	0
1827	0	-0.017416	0	-0.0545229	0	-0.0359695
1828	0	-0.191576	0	-0.19083	0	-0.191203
1829	0	-0.017416	0	-0.0408922	0	-0.0291541
1830	0	-0.052248	0	-0.122677	0	-0.0874623
1831	0	-0.034832	0	-0.0408922	0	-0.0378621
1832	0	-0.156744	0.0136307	-0.272615	0.00681537	-0.214679
1833	0	-0.034832	0	-0.0272615	0	-0.0310467
1834	0	-0.017416	0	-0.0272615	0	-0.0223387
1835	0	0	0	0	0	0
1836	0.017416	-0.0870801	0.0136307	-0.0408922	0.0155234	-0.0639861
1837	0	-0.034832	0	0	0	-0.017416
1838	0.017416	-0.034832	0	-0.0545229	0.00870801	-0.0446775
1839	0	0	0	-0.0954151	0	-0.0477076
1840	0	-0.017416	0	-0.0136307	0	-0.0155234
1841	0	0	0	-0.0545229	0	-0.0272615
1842	0	0	0	-0.0272615	0	-0.0136307
1843	0	0	0	-0.0545229	0	-0.0272615
1844	0	-0.017416	0	-0.0136307	0	-0.0155234
1845	0.017416	-0.034832	0	-0.0136307	0.00870801	-0.0242314
1846	0	-0.052248	0	-0.0272615	0	-0.0397548
1847	0.017416	-0.226408	0.0272615	-0.286245	0.0223387	-0.256327
1848	0.017416	-0.034832	0	-0.0817844	0.00870801	-0.0583082
1849	0	0	0	0	0	0
1850	0	0	0	0	0	0
1851	0	-0.069664	0	0	0	-0.034832
1852	0	-0.121912	0	-0.0545229	0	-0.0882175
1853	0	-0.034832	0	-0.1772	0	-0.106016
1854	0	-0.191576	0	-0.136307	0	-0.163942
1855	0.034832	-0.365736	0	-0.218092	0.017416	-0.291914
1856	0	-0.574728	0	-0.640644	0	-0.607686
1857	0	-0.365736	0	-0.0954151	0	-0.230576
1858	0	-0.104496	0	-0.0817844	0	-0.0931402
1859	0	-0.052248	0	-0.0272615	0	-0.0397548
1860	0	-0.121912	0.0272615	-0.0681537	0.0136307	-0.0950329
1861	0.052248	-0.017416	0.0136307	-0.0954151	0.0329394	-0.0564156
1862	0.017416	-0.052248	0.0136307	-0.0681537	0.0155234	-0.0602009
1863	0.017416	0	0.0136307	-0.149938	0.0155234	-0.074969
1864	0	-0.017416	0	0	0	-0.00870801
1865	0	-0.0870801	0.0136307	-0.122677	0.00681537	-0.104878
1866	0	-0.052248	0	-0.0817844	0	-0.0670162
1867	0.034832	-0.069664	0	-0.0272615	0.017416	-0.0484628
1868	0	-0.017416	0	-0.149938	0	-0.083677
1869	0	-0.888217	0.0136307	-0.790583	0.00681537	-0.8394
1870	0	-0.121912	0	-0.109046	0	-0.115479
1871	0	-0.034832	0	-0.109046	0	-0.0719389
1872	0	-0.156744	0	-0.136307	0	-0.146526
1873	0	-0.052248	0	-0.0545229	0	-0.0533855
1874	0	-0.017416	0	-0.0408922	0	-0.0291541
1875	0	0	0	-0.109046	0	-0.0545229
1876	0	0	0	-0.0136307	0	-0.00681537
1877	0	-0.017416	0	0	0	-0.00870801
1878	0	0	0	-0.0272615	0	-0.0136307
1879	0	0	0	-0.0136307	0	-0.00681537
1880	0	0	0.0136307	-0.0136307	0.00681537	-0.00681537
1881	0	-0.052248	0	-0.0681537	0	-0.0602009
1882	0	-0.034832	0.0136307	-0.0545229	0.00681537	-0.0446775
1883	0	-0.017416	0	-0.0681537	0	-0.0427848
1884	0	0	0	0	0	0
1885	0	0	0	0	0	0
1886	0	-0.034832	0	0	0	-0.017416
1887	0	-0.034832	0	-0.0136307	0	-0.0242314
1888	0.052248	-0.139328	0	-0.1772	0.026124	-0.158264
1889	0	-0.156744	0	-0.122677	0	-0.13971
1890	0	0	0	-0.0272615	0	-0.0136307
1891	0	-0.0870801	0	-0.0272615	0	-0.0571708
1892	0	-0.017416	0	0	0	-0.00870801
1893	0	-0.069664	0	-0.0545229	0	-0.0620935
1894	0	-0.034832	0	-0.0408922	0	-0.0378621
1895	0	-0.243824	0	-0.136307	0	-0.190066
1896	0	0	0	-0.109046	0	-0.0545229
1897	0	0	0.0136307	-0.0136307	0.00681537	-0.00681537
1898	0	-0.052248	0	-0.0545229	0	-0.0533855
1899	0	-0.052248	0	-0.0136307	0	-0.0329394
1900	0	0	0	-0.0272615	0	-0.0136307
1901	0	-0.017416	0	-0.0681537	0	-0.0427848
1902	0	0	0	-0.0136307	0	-0.00681537
1903	0	-0.069664	0	-0.122677	0	-0.0961703
1904	0	-0.017416	0	-0.0408922	0	-0.0291541
1905	0	0	0	-0.0408922	0	-0.0204461
1906	0	-0.017416	0	-0.0272615	0	-0.0223387
1907	0.017416	-0.034832	0	0	0.00870801	-0.017416
1908	0	-0.017416	0.0136307	-0.0408922	0.00681537	-0.0291541
1909	0	0	0	-0.0136307	0	-0.00681537
1910	0	-0.017416	0	-0.0408922	0	-0.0291541
1911	0	-0.017416	0	-0.0681537	0	-0.0427848
1912	0.017416	0	0.0136307	0	0.0155234	0
1913	0	-0.121912	0.0136307	-0.19083	0.00681537	-0.156371
1914	0	-0.052248	0	-0.0272615	0	-0.0397548
1915	0	0	0	0	0	0
1916	0	-0.017416	0	0	0	-0.00870801
1917	0	0	0	-0.0136307	0	-0.00681537
1918	0	-0.052248	0	-0.0681537	0	-0.0602009
1919	0	0	0.0408922	-0.122677	0.0204461	-0.0613383
1920	0	-0.034832	0	-0.122677	0	-0.0787543
1921	0	0	0.0136307	-0.0954151	0.00681537	-0.0477076
1922	0	0	0.0272615	0	0.0136307	0
1923	0.034832	-0.069664	0.0136307	-0.0136307	0.0242314	-0.0416474
1924	0	0	0	0	0	0
1925	0.069664	-0.052248	0.0272615	-0.122677	0.0484628	-0.0874623
1926	0	0	0	-0.0136307	0	-0.00681537
1927	0.052248	-0.069664	0	-0.0545229	0.026124	-0.0620935
1928	0	0	0	0	0	0
1929	0	-0.104496	0.0272615	-0.109046	0.0136307	-0.106771
1930	0	-0.156744	0.0136307	-0.0817844	0.00681537	-0.119264
1931	0	-0.139328	0.0272615	-0.218092	0.0136307	-0.17871
1932	0	-0.121912	0	-0.122677	0	-0.122294
1933	0.017416	-0.017416	0	0	0.00870801	-0.00870801
1934	0	-0.052248	0	-0.0681537	0	-0.0602009
1935	0	-0.069664	0	-0.149938	0	-0.109801
1936	0	-0.017416	0	0	0	-0.00870801
1937	0	-0.26124	0	-0.36803	0	-0.314635
1938	0	-0.034832	0	-0.0136307	0	-0.0242314
1939	0	0	0	-0.0408922	0	-0.0204461
1940	0	-0.017416	0	-0.0272615	0	-0.0223387
1941	0	-0.17416	0	-0.136307	0	-0.155234
1942	0	-0.139328	0	-0.109046	0	-0.124187
1943	0	-0.226408	0	-0.163569	0	-0.194988
1944	0.017416	-1.18429	0	-1.15861	0.00870801	-1.17145
1945	0	-0.034832	0	-0.0272615	0	-0.0310467
1946	0.017416	-0.069664	0	-0.136307	0.00870801	-0.102986
1947	0	-0.017416	0	-0.109046	0	-0.0632309
1948	0	-0.17416	0.0272615	-0.231722	0.0136307	-0.202941
1949	0.0870801	-0.156744	0	-0.218092	0.04354	-0.187418
1950	0	-0.121912	0	-0.0272615	0	-0.0745868
1951	0	-0.052248	0.0272615	-0.0545229	0.0136307	-0.0533855
1952	0	-0.0870801	0.0136307	-0.0272615	0.00681537	-0.0571708
1953	0	0	0	-0.0681537	0	-0.0340768
1954	0	-0.034832	0.0136307	-0.0272615	0.00681537	-0.0310467
1955	0	0	0	-0.0408922	0	-0.0204461
1956	0	-0.017416	0.0136307	0	0.00681537	-0.00870801
1957	0	0	0	-0.0136307	0	-0.00681537
1958	0.034832	-0.0870801	0	-0.0408922	0.017416	-0.0639861
1959	0	-0.0870801	0	-0.122677	0	-0.104878
1960	0.017416	-0.0870801	0.0272615	-0.149938	0.0223387	-0.118509
1961	0	-0.104496	0	-0.0681537	0	-0.0863249
1962	0	-0.139328	0.0272615	-0.272615	0.0136307	-0.205971
1963	0.034832	-0.034832	0	-0.0681537	0.017416	-0.0514928
1964	0	-0.017416	0	-0.0545229	0	-0.0359695
1965	0	0	0	-0.0136307	0	-0.00681537
1966	0	0	0	0	0	0
1967	0.017416	0	0	0	0.00870801	0
1968	0	0	0.0136307	0	0.00681537	0
1969	0	0	0.0545229	0	0.0272615	0
1970	0	0	0.0408922	-0.0136307	0.0204461	-0.00681537
1971	0	0	0	-0.0136307	0	-0.00681537
1972	0	0	0.0136307	-0.0272615	0.00681537	-0.0136307
1973	0.017416	-0.052248	0.0136307	0	0.0155234	-0.026124
1974	0	-0.034832	0	-0.0545229	0	-0.0446775
1975	0.034832	-0.017416	0.0272615	-0.0136307	0.0310467	-0.0155234
1976	0	0	0.0136307	-0.0136307	0.00681537	-0.00681537
1977	0	0	0.0272615	0	0.0136307	0
1978	0.034832	-0.052248	0.0545229	0	0.0446775	-0.026124
1979	0	0	0.0272615	-0.0272615	0.0136307	-0.0136307
1980	0	-0.034832	0	-0.0408922	0	-0.0378621
1981	0	-0.017416	0	-0.0681537	0	-0.0427848
1982	0	-0.278656	0	-0.327138	0	-0.302897
1983	0	-0.156744	0	-0.218092	0	-0.187418
1984	0	-0.017416	0.0136307	0	0.00681537	-0.00870801
1985	0	-0.017416	0	-0.0272615	0	-0.0223387
1986	0	-0.121912	0.0136307	-0.136307	0.00681537	-0.12911
1987	0	-0.069664	0	0	0	-0.034832
1988	0.017416	-0.470232	0	-0.477076	0.00870801	-0.473654
1989	0	-0.017416	0	-0.0681537	0	-0.0427848
1990	0.017416	-0.034832	0	-0.0545229	0.00870801	-0.0446775
1991	0	-0.034832	0	0	0	-0.017416
1992	0	-0.052248	0	-0.0408922	0	-0.0465701
1993	0	0	0	0	0	0
1994	0	-0.017416	0	0	0	-0.00870801
1995	0.034832	0	0	0	0.017416	0
1996	0	-0.034832	0	-0.0545229	0	-0.0446775
1997	0	-0.052248	0.0136307	0	0.00681537	-0.026124
1998	0	0	0	0	0	0
1999	0	-0.069664	0.0954151	0	0.0477076	-0.034832
[truncated: 782 more rows]

## Sheet: R-IL 10dpi (IL)
position	fwd 1	rev 1	fwd 2	rev 2	rightward	leftward
1	0	0	0	0	0	0
2	0	0	0	0	0	0
3	0	0	0	0	0	0
4	0	0	0	0	0	0
5	0	0	0	0	0	0
6	0	0	0	0	0	0
7	0	0	0	0	0	0
8	0	0	0	0	0	0
9	0	0	0	0	0	0
10	0	0	0	0	0	0
11	0	0	0	0	0	0
12	0	0	0	0	0	0
13	0	0	0	0	0	0
14	0	0	0	0	0	0
15	0	0	0	0	0	0
16	0	0	0	0	0	0
17	0	0	0	0	0	0
18	0	0	0	0	0	0
19	0	0	0	0	0	0
20	0	0	0	0	0	0
21	0	0	0	0	0	0
22	0	0	0	0	0	0
23	0	0	0	0	0	0
24	0	0	0	0	0	0
25	0	0	0	0	0	0
26	0	0	0	0	0	0
27	0	0	0	0	0	0
28	0	0	0	0	0	0
29	0	0	0	0	0	0
30	0	0	0	0	0	0
31	0	0	0	0	0	0
32	0	0	0	0	0	0
33	0	0	0	0	0	0
34	0	0	0	0	0	0
35	0	0	0	0	0	0
36	0	0	0	0	0	0
37	0	0	0	0	0	0
38	0	0	0	0	0	0
39	0	0	0	0	0	0
40	0	0	0	0	0	0
41	0	0	0	0	0	0
42	0	0	0	0	0	0
43	0	0	0	0	0	0
44	0	0	0	0	0	0
45	0	0	0	0	0	0
46	0	0	0	0	0	0
47	0	0	0	0	0	0
48	0	0	0	0	0	0
49	0	0	0	0	0	0
50	0	0	0	0	0	0
51	0	0	0	0	0	0
52	0	0	0	0	0	0
53	0	0	0	0	0	0
54	0	0	0	0	0	0
55	0	0	0	0	0	0
56	0	0	0	0	0	0
57	0	0	0	0	0	0
58	0	0	0	0	0	0
59	0	0	0	0	0	0
60	0	0	0	0	0	0
61	0	0	0	0	0	0
62	0	0	0	0	0	0
63	0	0	0	0	0	0
64	0	0	0	0	0	0
65	0	0	0	0	0	0
66	0	0	0	0	0	0
67	0	0	0	0	0	0
68	0	0	0	0	0	0
69	0	0	0	0	0	0
70	0	0	0	0	0	0
71	0	0	0	0	0	0
72	0	0	0	0	0	0
73	0	0	0	0	0	0
74	0	0	0	0	0	0
75	0	0	0	0	0	0
76	0	0	0	0	0	0
77	0	0	0	0	0	0
78	0	0	0	0	0	0
79	0	0	0	0	0	0
80	0	0	0	0	0	0
81	0	0	0	0	0	0
82	0	0	0	0	0	0
83	0	0	0	0	0	0
84	0	0	0	0	0	0
85	0	0	0	0	0	0
86	0	0	0	0	0	0
87	0	0	0	0	0	0
88	0	0	0	0	0	0
89	0	0	0	0	0	0
90	0	0	0	0	0	0
91	0	0	0	0	0	0
92	0	0	0	0	0	0
93	0	0	0	0	0	0
94	0	0	0	0	0	0
95	0	0	0	0	0	0
96	0	0	0	0	0	0
97	0	0	0	0	0	0
98	0	0	0	0	0	0
99	0	0	0	0	0	0
100	0	0	0	0	0	0
101	0	0	0	0	0	0
102	0	0	0	0	0	0
103	0	0	0	0	0	0
104	0	0	0	0	0	0
105	0	0	0	0	0	0
106	0	0	0	0	0	0
107	0	0	0	0	0	0
108	0	0	0	0	0	0
109	0	0	0	0	0	0
110	0	0	0	0	0	0
111	0	0	0	0	0	0
112	0	0	0	0	0	0
113	0	0	0	0	0	0
114	0	0	0	0	0	0
115	0	0	0	0	0	0
116	0	0	0	0	0	0
117	0	0	0	0	0	0
118	0	0	0	0	0	0
119	0	0	0	0	0	0
120	0	0	0	0	0	0
121	0	0	0	0	0	0
122	0	0	0	0	0	0
123	0	0	0	0	0	0
124	0	0	0	0	0	0
125	0	0	0	0	0	0
126	0	0	0	0	0	0
127	0	0	0	0	0	0
128	0.0153921	0	0	0	0.00769607	0
129	0	0	0	0	0	0
130	0	0	0	0	0	0
131	0	0	0	0	0	0
132	0	0	0	0	0	0
133	0	0	0	0	0	0
134	0	0	0	0	0	0
135	0	0	0	0	0	0
136	0	0	0	0	0	0
137	0	0	0	0	0	0
138	0	0	0	0	0	0
139	0	0	0	0	0	0
140	0	0	0	0	0	0
141	0	0	0.0168242	0	0.00841212	0
142	0	0	0	0	0	0
143	0	0	0	0	0	0
144	0	0	0	0	0	0
145	0	0	0	0	0	0
146	0	0	0	0	0	0
147	0	0	0	0	0	0
148	0	0	0	0	0	0
149	0	0	0	0	0	0
150	0	0	0	0	0	0
151	0	0	0	0	0	0
152	0	0	0	0	0	0
153	0	0	0	0	0	0
154	0	0	0	0	0	0
155	0	0	0	0	0	0
156	0.0461764	0	0.0336485	0	0.0399124	0
157	0.0307843	0	0.0168242	0	0.0238043	0
158	0.0307843	0	0.0168242	0	0.0238043	0
159	0.0153921	0	0	0	0.00769607	0
160	0.0307843	0	0.0168242	0	0.0238043	0
161	0.138529	0	0.0504727	0	0.094501	0
162	0.0615686	0	0.0336485	0	0.0476085	0
163	0	0	0.0168242	0	0.00841212	0
164	0	0	0	0	0	0
165	0.0307843	0	0	0	0.0153921	0
166	0	0	0.0336485	0	0.0168242	0
167	0	0	0	0	0	0
168	0	0	0.0168242	0	0.00841212	0
169	0.0307843	0	0	0	0.0153921	0
170	0	0	0	0	0	0
171	0	0	0.0336485	0	0.0168242	0
172	0.0153921	0	0	0	0.00769607	0
173	0.0615686	0	0.0672969	0	0.0644327	0
174	0	0	0.0168242	0	0.00841212	0
175	0.0307843	0	0.0336485	0	0.0322164	0
176	0	0	0	0	0	0
177	0.0615686	0	0	0	0.0307843	0
178	0	0	0	0	0	0
179	0	0	0	0	0	0
180	0	0	0	0	0	0
181	0	0	0	0	0	0
182	0	0	0	0	0	0
183	0	0	0	0	0	0
184	0.0153921	0	0	0	0.00769607	0
185	0.0153921	0	0.0168242	0	0.0161082	0
186	0	0	0	0	0	0
187	0	0	0	0	0	0
188	0	0	0	0	0	0
189	0.0153921	0	0.0168242	0	0.0161082	0
190	0.0307843	0	0	0	0.0153921	0
191	0	0	0	0	0	0
192	0	0	0	0	0	0
193	0	0	0	0	0	0
194	0	0	0	0	0	0
195	0	0	0	0	0	0
196	0	0	0	0	0	0
197	0.0461764	0	0	0	0.0230882	0
198	0	0	0.0336485	0	0.0168242	0
199	0	0	0	0	0	0
200	0.0153921	0	0	0	0.00769607	0
201	0.0153921	0	0	0	0.00769607	0
202	0	0	0	0	0	0
203	0	0	0	0	0	0
204	0.0461764	0	0	0	0.0230882	0
205	0	0	0	0	0	0
206	0	0	0.0336485	0	0.0168242	0
207	0	0	0.0336485	0	0.0168242	0
208	0.0153921	0	0	0	0.00769607	0
209	0	0	0	0	0	0
210	0	0	0	0	0	0
211	0	0	0.0168242	0	0.00841212	0
212	0	0	0	0	0	0
213	0.0307843	0	0	0	0.0153921	0
214	0.0153921	0	0	0	0.00769607	0
215	0	0	0	0	0	0
216	0	0	0	0	0	0
217	0	0	0	0	0	0
218	0.0769607	0	0.0504727	0	0.0637167	0
219	0	0	0.0168242	0	0.00841212	0
220	0	0	0	0	0	0
221	0.123137	0	0.0504727	0	0.0868049	0
222	0.0769607	0	0	0	0.0384803	0
223	0	0	0	0	0	0
224	0.0153921	0	0	0	0.00769607	0
225	0.0153921	0	0	0	0.00769607	0
226	0.0153921	0	0	0	0.00769607	0
227	0	0	0	0	0	0
228	0	0	0.0168242	0	0.00841212	0
229	0.0461764	0	0	0	0.0230882	0
230	0	0	0	0	0	0
231	0	0	0	0	0	0
232	0.0153921	0	0	0	0.00769607	0
233	0.0461764	0	0	0	0.0230882	0
234	0.0307843	0	0.0336485	0	0.0322164	0
235	0	0	0	0	0	0
236	0.0307843	0	0	0	0.0153921	0
237	0	0	0	0	0	0
238	0	0	0	0	0	0
239	0.0615686	0	0	0	0.0307843	0
240	0	0	0	0	0	0
241	0.0307843	0	0.0672969	0	0.0490406	0
242	0.0153921	0	0.0168242	0	0.0161082	0
243	0.0615686	0	0.0504727	0	0.0560206	0
244	0.0153921	0	0	0	0.00769607	0
245	0	0	0.0336485	0	0.0168242	0
246	0.0461764	0	0	0	0.0230882	0
247	0	0	0	0	0	0
248	0.0307843	0	0.0168242	0	0.0238043	0
249	0.0153921	0	0	0	0.00769607	0
250	0.123137	0	0.0336485	0	0.0783928	0
251	0.0153921	0	0.0168242	0	0.0161082	0
252	0	0	0	0	0	0
253	0	0	0	0	0	0
254	0.21549	0	0.11777	0	0.16663	0
255	0.107745	0	0.0168242	0	0.0622846	0
256	0	0	0.0168242	0	0.00841212	0
257	0.107745	0	0.0336485	0	0.0706967	0
258	0	0	0	0	0	0
259	0.0307843	0	0.0168242	0	0.0238043	0
260	0.0153921	0	0	0	0.00769607	0
261	0	0	0	0	0	0
262	0.0153921	0	0	0	0.00769607	0
263	0	0	0.0168242	0	0.00841212	0
264	0.0307843	0	0.0504727	0	0.0406285	0
265	0.0307843	0	0.0168242	0	0.0238043	0
266	0.338627	0	0.0336485	0	0.186138	0
267	0.0461764	0	0	0	0.0230882	0
268	0.0153921	0	0.0168242	0	0.0161082	0
269	0	0	0	0	0	0
270	0	0	0	0	0	0
271	0.0153921	0	0	0	0.00769607	0
272	0	0	0	0	0	0
273	0.0153921	0	0.0168242	0	0.0161082	0
274	0	0	0	0	0	0
275	0.0615686	0	0	0	0.0307843	0
276	0	0	0	0	0	0
277	0.0307843	0	0	0	0.0153921	0
278	0	0	0	0	0	0
279	0	0	0	0	0	0
280	0.184706	0	0.0504727	0	0.117589	0
281	0.0153921	0	0.0168242	0	0.0161082	0
282	0.0153921	0	0	0	0.00769607	0
283	0	0	0.0168242	0	0.00841212	0
284	0.0923528	0	0.0504727	0	0.0714128	0
285	0.400196	0	0.134594	0	0.267395	0
286	0	0	0.0168242	0	0.00841212	0
287	0	0	0	0	0	0
288	0	0	0	0	0	0
289	0	0	0	0	0	0
290	0	0	0	0	0	0
291	0.0307843	0	0	0	0.0153921	0
292	0	0	0	0	0	0
293	0	0	0	0	0	0
294	0	0	0.0168242	0	0.00841212	0
295	0.0153921	0	0	0	0.00769607	0
296	0.0461764	0	0.0168242	0	0.0315003	0
297	0.0153921	0	0	0	0.00769607	0
298	0.0153921	0	0	0	0.00769607	0
299	0.0153921	0	0	0	0.00769607	0
300	0	0	0.0168242	0	0.00841212	0
301	0.0307843	0	0.0504727	0	0.0406285	0
302	0.0153921	0	0	0	0.00769607	0
303	0	0	0	0	0	0
304	0	0	0.0168242	0	0.00841212	0
305	0.0153921	0	0	0	0.00769607	0
306	0	0	0	0	0	0
307	0.0307843	0	0	0	0.0153921	0
308	0	0	0	0	0	0
309	0	0	0.0168242	0	0.00841212	0
310	0.200098	0	0.0841212	0	0.142109	0
311	0	0	0	0	0	0
312	0.0153921	0	0.0336485	0	0.0245203	0
313	0	0	0	0	0	0
314	0.0307843	0	0	0	0.0153921	0
315	0.0153921	0	0	0	0.00769607	0
316	0	0	0.0168242	0	0.00841212	0
317	0.0461764	0	0	0	0.0230882	0
318	0	0	0	0	0	0
319	0.0153921	0	0	0	0.00769607	0
320	0.107745	0	0.0504727	0	0.0791088	0
321	0.0461764	0	0.0168242	0	0.0315003	0
322	0.107745	0	0.0504727	0	0.0791088	0
323	0	0	0.0168242	0	0.00841212	0
324	0.0307843	0	0.0168242	0	0.0238043	0
325	0.0307843	0	0	0	0.0153921	0
326	0	0	0	0	0	0
327	0	0	0	0	0	0
328	0.0307843	0	0	0	0.0153921	0
329	0.0153921	0	0	0	0.00769607	0
330	0.0153921	0	0	0	0.00769607	0
331	0.0923528	0	0.0168242	0	0.0545885	0
332	0.123137	0	0.0336485	0	0.0783928	0
333	0.0923528	0	0.0672969	0	0.0798249	0
334	0.0461764	0	0	0	0.0230882	0
335	0.184706	0	0.134594	0	0.15965	0
336	0.0461764	0	0.0168242	0	0.0315003	0
337	0	0	0	0	0	0
338	0	0	0	0	0	0
339	0	0	0	0	0	0
340	0	0	0	0	0	0
341	0	0	0	0	0	0
342	0.0153921	0	0	0	0.00769607	0
343	0.0923528	0	0.0168242	0	0.0545885	0
344	0.0153921	0	0	0	0.00769607	0
345	0.0307843	0	0	0	0.0153921	0
346	0	0	0	0	0	0
347	0	0	0	0	0	0
348	0	0	0	0	0	0
349	0.0461764	0	0.0168242	0	0.0315003	0
350	0	0	0.0168242	0	0.00841212	0
351	0.0769607	0	0	0	0.0384803	0
352	0.0307843	0	0.0168242	0	0.0238043	0
353	0.0153921	0	0	0	0.00769607	0
354	0	0	0	0	0	0
355	0.0153921	0	0.0168242	0	0.0161082	0
356	0.0461764	0	0.0168242	0	0.0315003	0
357	0	0	0	0	0	0
358	0	0	0	0	0	0
359	0	0	0	0	0	0
360	0	0	0	0	0	0
361	0.0461764	0	0.0168242	0	0.0315003	0
362	0.0615686	0	0.0336485	0	0.0476085	0
363	0	0	0	0	0	0
364	0	0	0	0	0	0
365	0	0	0	0	0	0
366	0.0307843	0	0.0336485	0	0.0322164	0
367	0.138529	0	0.0841212	0	0.111325	0
368	0.0615686	0	0.0168242	0	0.0391964	0
369	0.0153921	0	0.0336485	0	0.0245203	0
370	0.0769607	0	0.0168242	0	0.0468925	0
371	0.0153921	0	0	0	0.00769607	0
372	0.0307843	0	0.0504727	0	0.0406285	0
373	0.138529	0	0.0168242	0	0.0776767	0
374	0	0	0	0	0	0
375	0.0307843	0	0	0	0.0153921	0
376	0.0153921	0	0.0168242	0	0.0161082	0
377	0.0153921	0	0	0	0.00769607	0
378	0.0153921	0	0	0	0.00769607	0
379	0.0153921	0	0	0	0.00769607	0
380	0.0307843	0	0.0504727	0	0.0406285	0
381	0	0	0.0336485	0	0.0168242	0
382	0.0461764	0	0	0	0.0230882	0
383	0	0	0	0	0	0
384	0.0307843	0	0	0	0.0153921	0
385	0	0	0	0	0	0
386	0.0153921	0	0	0	0.00769607	0
387	0	0	0	0	0	0
388	0.0769607	0	0.0504727	0	0.0637167	0
389	0.0461764	0	0.0336485	0	0.0399124	0
390	0	0	0.0168242	0	0.00841212	0
391	0.0153921	0	0	0	0.00769607	0
392	0.0153921	0	0	0	0.00769607	0
393	0.0769607	0	0.0504727	0	0.0637167	0
394	0.0153921	0	0	0	0.00769607	0
395	0.0769607	0	0.0672969	0	0.0721288	0
396	0.0153921	0	0.0168242	0	0.0161082	0
397	0.0307843	0	0	0	0.0153921	0
398	0.0615686	0	0.0336485	0	0.0476085	0
399	0.0153921	0	0	0	0.00769607	0
400	0.0461764	0	0.0168242	0	0.0315003	0
401	0.0769607	0	0.0504727	0	0.0637167	0
402	0.0153921	0	0	0	0.00769607	0
403	0	0	0	0	0	0
404	0.0153921	0	0.0336485	0	0.0245203	0
405	0.0153921	0	0	0	0.00769607	0
406	0.123137	0	0.0504727	0	0.0868049	0
407	0.0461764	0	0.0672969	0	0.0567367	0
408	0.107745	0	0	0	0.0538725	0
409	0.0307843	0	0	0	0.0153921	0
410	0.0615686	0	0	0	0.0307843	0
411	0.0307843	0	0	0	0.0153921	0
412	0.0307843	0	0	0	0.0153921	0
413	0.138529	0	0.0168242	0	0.0776767	0
414	0.0153921	0	0	0	0.00769607	0
415	0	0	0	0	0	0
416	0	0	0	0	0	0
417	0	0	0	0	0	0
418	0.0615686	0	0	0	0.0307843	0
419	0.0769607	0	0.0168242	0	0.0468925	0
420	0.0923528	0	0.0504727	0	0.0714128	0
421	0.169314	0	0.100945	0	0.135129	0
422	0.107745	0	0	0	0.0538725	0
423	0.0615686	0	0.0841212	0	0.0728449	0
424	0	0	0	0	0	0
425	0	0	0	0	0	0
426	0	0	0	0	0	0
427	0.0153921	0	0.0168242	0	0.0161082	0
428	0	0	0.0168242	0	0.00841212	0
429	0	0	0.0336485	0	0.0168242	0
430	0.0461764	0	0	0	0.0230882	0
431	0.0153921	0	0.0168242	0	0.0161082	0
432	0	0	0	0	0	0
433	0.0153921	0	0	0	0.00769607	0
434	0.230882	0	0.134594	0	0.182738	0
435	0.0153921	0	0	0	0.00769607	0
436	0.0153921	0	0.0841212	0	0.0497567	0
437	0	0	0	0	0	0
438	0.0461764	0	0.185067	0	0.115622	0
439	0.0153921	0	0	0	0.00769607	0
440	0.0923528	0	0.0168242	0	0.0545885	0
441	0.0153921	0	0.0168242	0	0.0161082	0
442	0.0769607	0	0.0168242	0	0.0468925	0
443	0.0153921	0	0	0	0.00769607	0
444	0.0461764	0	0	0	0.0230882	0
445	0.0615686	0	0	0	0.0307843	0
446	0.0307843	0	0	0	0.0153921	0
447	0	0	0.0168242	0	0.00841212	0
448	0.0153921	0	0	0	0.00769607	0
449	0.138529	0	0	0	0.0692646	0
450	0.123137	0	0.0672969	0	0.095217	0
451	0.0307843	0	0.0336485	0	0.0322164	0
452	0.107745	0	0.0168242	0	0.0622846	0
453	0	0	0	0	0	0
454	0	0	0.0336485	0	0.0168242	0
455	0	0	0	0	0	0
456	0.0923528	0	0.0504727	0	0.0714128	0
457	0.0307843	0	0.0168242	0	0.0238043	0
458	0	0	0	0	0	0
459	0	0	0	0	0	0
460	0.0307843	0	0.0504727	0	0.0406285	0
461	0.184706	0	0	0	0.0923528	0
462	0.0153921	0	0	0	0.00769607	0
463	0.0461764	0	0.0168242	0	0.0315003	0
464	0.261666	0	0.11777	0	0.189718	0
465	0	0	0	0	0	0
466	0.0923528	0	0.134594	0	0.113473	0
467	0.0153921	0	0	0	0.00769607	0
468	0.107745	0	0.151418	0	0.129582	0
469	0.0461764	0	0.0168242	0	0.0315003	0
470	0.0769607	0	0	0	0.0384803	0
471	0.0307843	0	0	0	0.0153921	0
472	0.0153921	0	0	0	0.00769607	0
473	0.0153921	0	0	0	0.00769607	0
474	0.0153921	0	0.0168242	0	0.0161082	0
475	0	0	0.0336485	0	0.0168242	0
476	0	0	0	0	0	0
477	0.0307843	0	0.0504727	0	0.0406285	0
478	0.0461764	0	0	0	0.0230882	0
479	0.0461764	0	0.0504727	0	0.0483246	0
480	0.0153921	0	0	0	0.00769607	0
481	0.107745	0	0.0504727	0	0.0791088	0
482	0.0307843	0	0.0168242	0	0.0238043	0
483	0.0615686	0	0.0168242	0	0.0391964	0
484	0	0	0	0	0	0
485	0.0153921	0	0	0	0.00769607	0
486	0.0307843	0	0.0841212	0	0.0574527	0
487	0.0923528	0	0.0336485	0	0.0630007	0
488	0.0461764	0	0.0336485	0	0.0399124	0
489	0.0461764	0	0.0336485	0	0.0399124	0
490	0.0615686	0	0	0	0.0307843	0
491	0.0461764	0	0.0672969	0	0.0567367	0
492	0	0	0	0	0	0
493	0.0615686	0	0.0168242	0	0.0391964	0
494	0.0153921	0	0.0504727	0	0.0329324	0
495	0	0	0.0168242	0	0.00841212	0
496	0	0	0.0336485	0	0.0168242	0
497	0.0153921	0	0.0168242	0	0.0161082	0
498	0.0461764	0	0	0	0.0230882	0
499	0.0923528	0	0	0	0.0461764	0
500	0.169314	0	0.0672969	0	0.118305	0
501	0.0461764	0	0.0168242	0	0.0315003	0
502	0.0153921	0	0.0336485	0	0.0245203	0
503	0.0461764	0	0.0504727	0	0.0483246	0
504	0.200098	0	0.151418	0	0.175758	0
505	0.0307843	0	0	0	0.0153921	0
506	0.0461764	-0.0153921	0	0	0.0230882	-0.00769607
507	0.0307843	0	0.0336485	0	0.0322164	0
508	0.0461764	0	0	0	0.0230882	0
509	0	0	0	0	0	0
510	0.0153921	0	0	0	0.00769607	0
511	0.0461764	0	0.0504727	0	0.0483246	0
512	0	0	0.0841212	0	0.0420606	0
513	0.107745	0	0	0	0.0538725	0
514	0.0615686	0	0.0168242	0	0.0391964	0
515	0.0769607	0	0.0168242	0	0.0468925	0
516	0	0	0	0	0	0
517	0	0	0	0	0	0
518	0.138529	0	0.0168242	0	0.0776767	0
519	0.0307843	0	0	0	0.0153921	0
520	0.138529	0	0	0	0.0692646	0
521	0	0	0	0	0	0
522	0.0153921	0	0.0168242	0	0.0161082	0
523	0.0461764	0	0	0	0.0230882	0
524	0.169314	0	0.0168242	0	0.0930689	0
525	0.0923528	0	0.100945	0	0.0966491	0
526	0	0	0.0168242	0	0.00841212	0
527	0.0307843	0	0.0168242	0	0.0238043	0
528	0	0	0	0	0	0
529	0	0	0.0504727	0	0.0252364	0
530	0.0769607	0	0.151418	0	0.114189	0
531	0.0153921	0	0	0	0.00769607	0
532	0.0769607	0	0.0336485	0	0.0553046	0
533	0.0461764	0	0	0	0.0230882	0
534	0.107745	0	0.0841212	0	0.0959331	0
535	0.0461764	0	0.0168242	0	0.0315003	0
536	0	0	0	0	0	0
537	0.0461764	0	0.0504727	0	0.0483246	0
538	0.0153921	0	0.0168242	0	0.0161082	0
539	0.0615686	0	0.0336485	0	0.0476085	0
540	0.0153921	0	0.0168242	0	0.0161082	0
541	0.0307843	0	0.0336485	0	0.0322164	0
542	0.0769607	0	0.151418	0	0.114189	0
543	0	0	0	0	0	0
544	0	-0.0153921	0	0	0	-0.00769607
545	0.0307843	0	0	0	0.0153921	0
546	0.0153921	0	0.0504727	0	0.0329324	0
547	0	0	0	0	0	0
548	0.138529	0	0.100945	0	0.119737	0
549	0.0461764	0	0.0168242	0	0.0315003	0
550	0.153921	0	0.100945	0	0.127433	0
551	0.0461764	0	0.0336485	0	0.0399124	0
552	0.200098	0	0.100945	0	0.150522	0
553	0.0615686	0	0	0	0.0307843	0
554	0	0	0.0168242	0	0.00841212	0
555	0	0	0	0	0	0
556	0.0923528	0	0.0504727	0	0.0714128	0
557	0.138529	0	0.0672969	0	0.102913	0
558	0	0	0.0168242	0	0.00841212	0
559	0.0615686	0	0.0336485	0	0.0476085	0
560	0.0461764	0	0.0336485	0	0.0399124	0
561	0.0615686	0	0.0504727	0	0.0560206	0
562	0.0153921	0	0	0	0.00769607	0
563	0	0	0	0	0	0
564	0	0	0	0	0	0
565	0	0	0	0	0	0
566	0	0	0	0	0	0
567	0	0	0.0168242	0	0.00841212	0
568	0.0307843	0	0	0	0.0153921	0
569	0	0	0.0168242	0	0.00841212	0
570	0.0153921	0	0	0	0.00769607	0
571	0	0	0	0	0	0
572	0.0153921	0	0.0336485	0	0.0245203	0
573	0.0307843	0	0	0	0.0153921	0
574	0.369411	0	0.252364	0	0.310887	0
575	0.323235	0	0.134594	0	0.228914	0
576	0.0615686	0	0	0	0.0307843	0
577	0	0	0	0	0	0
578	0.0153921	0	0.0504727	0	0.0329324	0
579	0.0769607	0	0.0336485	0	0.0553046	0
580	0.0461764	0	0.0336485	0	0.0399124	0
581	0.0615686	0	0	0	0.0307843	0
582	0	0	0	0	0	0
583	0	0	0.0168242	0	0.00841212	0
584	0	0	0.0168242	0	0.00841212	0
585	0.0153921	0	0	0	0.00769607	0
586	0.0153921	0	0.0504727	0	0.0329324	0
587	0.0769607	0	0.0504727	0	0.0637167	0
588	0.0307843	0	0.0504727	0	0.0406285	0
589	0.107745	0	0	0	0.0538725	0
590	0.0769607	0	0.0841212	0	0.0805409	0
591	0	0	0	0	0	0
592	0.246274	0	0.168242	0	0.207258	0
593	0.0461764	0	0.0336485	0	0.0399124	0
594	0	0	0	0	0	0
595	0.0923528	0	0.0841212	0	0.088237	0
596	0.0615686	0	0.0336485	0	0.0476085	0
597	0.0923528	0	0.11777	0	0.105061	0
598	0.0153921	0	0.0168242	0	0.0161082	0
599	0.123137	0	0.0336485	0	0.0783928	0
600	0.0461764	0	0	0	0.0230882	0
601	0	0	0.0168242	0	0.00841212	0
602	0.0153921	0	0	0	0.00769607	0
603	0	0	0	0	0	0
604	0.0923528	0	0.0168242	0	0.0545885	0
605	0.0307843	0	0.0336485	0	0.0322164	0
606	0.21549	0	0.134594	0	0.175042	0
607	0.0153921	0	0	0	0.00769607	0
608	0.138529	0	0.168242	0	0.153386	0
609	0.0615686	0	0.0841212	0	0.0728449	0
610	0.0153921	0	0.0336485	0	0.0245203	0
611	0.184706	0	0.151418	0	0.168062	0
612	0.0461764	0	0.0336485	0	0.0399124	0
613	0.0615686	0	0.11777	0	0.0896691	0
614	0.261666	0	0.218715	0	0.240191	0
615	0.200098	0	0.0672969	0	0.133697	0
616	0.0461764	0	0.0504727	0	0.0483246	0
617	0.0307843	0	0.0168242	0	0.0238043	0
618	0	0	0	0	0	0
619	0	0	0	0	0	0
620	0	0	0	0	0	0
621	0	0	0	0	0	0
622	0	0	0	0	0	0
623	0.0153921	0	0.0504727	0	0.0329324	0
624	0	0	0	0	0	0
625	0.0307843	0	0	0	0.0153921	0
626	0.0153921	0	0.0168242	0	0.0161082	0
627	0.0615686	0	0.0672969	0	0.0644327	0
628	0	0	0.0168242	0	0.00841212	0
629	0.153921	0	0.0672969	0	0.110609	0
630	0.0307843	0	0.100945	0	0.0658648	0
631	0.0461764	0	0.0168242	0	0.0315003	0
632	0.0153921	0	0.0841212	0	0.0497567	0
633	0.0461764	0	0.0168242	0	0.0315003	0
634	0.261666	-0.0153921	0.168242	0	0.214954	-0.00769607
635	0.0153921	0	0.0672969	0	0.0413445	0
636	0.0153921	0	0.0168242	0	0.0161082	0
637	0.0461764	0	0	0	0.0230882	0
638	0	0	0	0	0	0
639	0.0769607	0	0.0168242	0	0.0468925	0
640	0.0153921	0	0.0168242	0	0.0161082	0
641	0.200098	-0.0153921	0.100945	0	0.150522	-0.00769607
642	0.0923528	0	0.0336485	0	0.0630007	0
643	0.0461764	0	0	0	0.0230882	0
644	0.0769607	0	0.0504727	0	0.0637167	0
645	0.169314	0	0.0672969	0	0.118305	0
646	0.138529	0	0.0672969	0	0.102913	0
647	0	0	0	0	0	0
648	0.0615686	0	0.0168242	0	0.0391964	0
649	0.0461764	0	0	0	0.0230882	0
650	0.0153921	0	0	0	0.00769607	0
651	0.0153921	0	0	0	0.00769607	0
652	0.0615686	0	0.0336485	0	0.0476085	0
653	0.0461764	0	0.0336485	0	0.0399124	0
654	0.123137	0	0.0841212	0	0.103629	0
655	0.0923528	0	0.0504727	0	0.0714128	0
656	0.0769607	0	0.0168242	0	0.0468925	0
657	0.107745	0	0.0168242	0	0.0622846	0
658	0.107745	0	0.151418	0	0.129582	0
659	0.0923528	0	0.0672969	0	0.0798249	0
660	0.138529	0	0.0841212	0	0.111325	0
661	0.0153921	0	0.0168242	0	0.0161082	0
662	0.0615686	0	0.0168242	0	0.0391964	0
663	0.0153921	0	0.0168242	0	0.0161082	0
664	0.0615686	0	0.0336485	0	0.0476085	0
665	0.0923528	0	0	0	0.0461764	0
666	0	0	0	0	0	0
667	0.0153921	0	0	0	0.00769607	0
668	0.0923528	0	0.0336485	0	0.0630007	0
669	0.0153921	0	0	0	0.00769607	0
670	0.0461764	0	0	0	0.0230882	0
671	0	0	0	0	0	0
672	0.169314	0	0.0841212	0	0.126717	0
673	0	0	0.0168242	0	0.00841212	0
674	0.354019	0	0.134594	0	0.244307	0
675	0	0	0	0	0	0
676	0.0461764	0	0.0672969	0	0.0567367	0
677	0.169314	0	0.218715	0	0.194014	0
678	0	0	0.0168242	0	0.00841212	0
679	0.184706	0	0.134594	0	0.15965	0
680	0.261666	0	0.11777	0	0.189718	0
681	0.0307843	0	0.0336485	0	0.0322164	0
682	0.0153921	0	0.0336485	0	0.0245203	0
683	0	0	0.0168242	0	0.00841212	0
684	0.0153921	0	0	0	0.00769607	0
685	0.0307843	0	0.0336485	0	0.0322164	0
686	0.0461764	0	0.0168242	0	0.0315003	0
687	0.0153921	0	0.0168242	0	0.0161082	0
688	0	0	0.0336485	0	0.0168242	0
689	0	0	0.0336485	0	0.0168242	0
690	0.0153921	0	0	0	0.00769607	0
691	0.0153921	0	0	0	0.00769607	0
692	0.0923528	0	0	0	0.0461764	0
693	0.0769607	0	0.0168242	0	0.0468925	0
694	0.0461764	0	0.0504727	0	0.0483246	0
695	0.0153921	0	0	0	0.00769607	0
696	0	0	0	0	0	0
697	0.0461764	0	0.0336485	0	0.0399124	0
698	0.0923528	0	0.0672969	0	0.0798249	0
699	0.0307843	0	0.0168242	0	0.0238043	0
700	0.0307843	0	0.0168242	0	0.0238043	0
701	0.246274	0	0.134594	0	0.190434	0
702	0.138529	0	0.134594	0	0.136562	0
703	0.369411	0	0.252364	0	0.310887	0
704	0	0	0.0504727	0	0.0252364	0
705	0.184706	0	0.0672969	0	0.126001	0
706	0	0	0.0168242	0	0.00841212	0
707	0	0	0	0	0	0
708	0.0461764	0	0.0672969	0	0.0567367	0
709	0	0	0	0	0	0
710	0	0	0	0	0	0
711	0.0615686	0	0.0841212	0	0.0728449	0
712	0.0307843	0	0.0504727	0	0.0406285	0
713	0.138529	0	0.0672969	0	0.102913	0
714	0.138529	0	0.0336485	0	0.0860889	0
715	0.230882	0	0.11777	0	0.174326	0
716	0.0153921	0	0.0336485	0	0.0245203	0
717	0.0461764	0	0.0504727	0	0.0483246	0
718	0.292451	0	0.286012	0	0.289231	0
719	0.0615686	0	0.11777	0	0.0896691	0
720	0.0307843	0	0.0504727	0	0.0406285	0
721	0.0615686	0	0.134594	0	0.0980812	0
722	0	0	0	0	0	0
723	0.0307843	0	0.0168242	0	0.0238043	0
724	0.0769607	0	0	0	0.0384803	0
725	0	0	0.0168242	0	0.00841212	0
726	0	0	0	0	0	0
727	0	0	0	0	0	0
728	0.0307843	0	0.0168242	0	0.0238043	0
729	0	0	0	0	0	0
730	0.0153921	0	0	0	0.00769607	0
731	0.0307843	0	0.0336485	0	0.0322164	0
732	0.200098	0	0.100945	0	0.150522	0
733	0	0	0.0504727	0	0.0252364	0
734	0.0461764	0	0.0672969	0	0.0567367	0
735	0.0153921	0	0.0841212	0	0.0497567	0
736	0.0923528	0	0.0336485	0	0.0630007	0
737	0.0923528	0	0.11777	0	0.105061	0
738	0.0615686	0	0.0672969	0	0.0644327	0
739	0.0153921	0	0	0	0.00769607	0
740	0	0	0	0	0	0
741	0	0	0.0168242	0	0.00841212	0
742	0.184706	0	0.0336485	0	0.109177	0
743	0.0153921	0	0	0	0.00769607	0
744	0.0153921	0	0.0168242	0	0.0161082	0
745	0	0	0	0	0	0
746	0.0461764	0	0	0	0.0230882	0
747	0.0615686	0	0	0	0.0307843	0
748	0.0307843	0	0.0336485	0	0.0322164	0
749	0	0	0.0168242	0	0.00841212	0
750	0.153921	0	0.0672969	0	0.110609	0
751	0.184706	0	0.11777	0	0.151238	0
752	0.0307843	0	0.0168242	0	0.0238043	0
753	0.0923528	0	0.134594	0	0.113473	0
754	0	0	0	0	0	0
755	0.0307843	0	0.0168242	0	0.0238043	0
756	0.0769607	0	0.0504727	0	0.0637167	0
757	0	0	0	0	0	0
758	0.0307843	0	0.0168242	0	0.0238043	0
759	0	0	0	0	0	0
760	0.0153921	0	0	0	0.00769607	0
761	0	0	0	0	0	0
762	0.0615686	0	0.0336485	0	0.0476085	0
763	0.0615686	0	0.0336485	0	0.0476085	0
764	0	0	0	0	0	0
765	0.153921	0	0.0504727	0	0.102197	0
766	0	0	0	0	0	0
767	0.0153921	0	0.0168242	0	0.0161082	0
768	0.0461764	0	0.0168242	0	0.0315003	0
769	0.0153921	0	0	0	0.00769607	0
770	0.0307843	0	0	0	0.0153921	0
771	0	0	0	0	0	0
772	0	0	0	0	0	0
773	0.0153921	0	0.0168242	0	0.0161082	0
774	0	0	0.0168242	0	0.00841212	0
775	0.0923528	0	0.0168242	0	0.0545885	0
776	0.0923528	0	0.134594	0	0.113473	0
777	0.0461764	0	0.0168242	0	0.0315003	0
778	0.0769607	0	0	0	0.0384803	0
779	0.0461764	0	0	0	0.0230882	0
780	0.184706	0	0.100945	0	0.142826	0
781	0.21549	0	0.0841212	0	0.149806	0
782	0.0461764	0	0.0336485	0	0.0399124	0
783	0.0307843	0	0.0672969	0	0.0490406	0
784	0	0	0.0336485	0	0.0168242	0
785	0	0	0	0	0	0
786	0.0153921	0	0	0	0.00769607	0
787	0.0615686	0	0.0672969	0	0.0644327	0
788	0.0307843	0	0	0	0.0153921	0
789	0.0307843	0	0.0336485	0	0.0322164	0
790	0.0153921	0	0.0504727	0	0.0329324	0
791	0	0	0	0	0	0
792	0	0	0	0	0	0
793	0	0	0.0168242	0	0.00841212	0
794	0.0769607	0	0.0168242	0	0.0468925	0
795	0.0461764	0	0	0	0.0230882	0
796	0.354019	0	0.252364	0	0.303191	0
797	0.0769607	0	0.0336485	0	0.0553046	0
798	0.0307843	0	0.0168242	0	0.0238043	0
799	0.0461764	0	0	0	0.0230882	0
800	0.0461764	0	0.151418	0	0.0987973	0
801	0.0461764	0	0.0672969	0	0.0567367	0
802	0.107745	0	0	0	0.0538725	0
803	0.0923528	0	0.168242	0	0.130298	0
804	0.400196	0	0.353309	0	0.376752	0
805	0	0	0	0	0	0
806	0.0461764	0	0	0	0.0230882	0
807	0.0307843	0	0.0168242	0	0.0238043	0
808	0.0153921	0	0	0	0.00769607	0
809	0.0153921	0	0	0	0.00769607	0
810	0.0307843	0	0.0168242	0	0.0238043	0
811	0	0	0	0	0	0
812	0.0153921	0	0	0	0.00769607	0
813	0.0153921	0	0	0	0.00769607	0
814	0.107745	0	0.100945	0	0.104345	0
815	0.0769607	0	0.0336485	0	0.0553046	0
816	0.261666	0	0.134594	0	0.19813	0
817	0.0615686	0	0	0	0.0307843	0
818	0.0307843	0	0	0	0.0153921	0
819	0	0	0	0	0	0
820	0.107745	0	0.0841212	0	0.0959331	0
821	0.0153921	0	0	0	0.00769607	0
822	0.0153921	0	0	0	0.00769607	0
823	0.0923528	0	0	0	0.0461764	0
824	0.0307843	0	0	0	0.0153921	0
825	0.0153921	0	0	0	0.00769607	0
826	0	0	0.0168242	0	0.00841212	0
827	0	0	0	0	0	0
828	0.0307843	0	0.0168242	0	0.0238043	0
829	0	0	0.0168242	0	0.00841212	0
830	0.0307843	0	0.0168242	0	0.0238043	0
831	0.0153921	0	0.0168242	0	0.0161082	0
832	0.169314	0	0.134594	0	0.151954	0
833	0.0307843	0	0	0	0.0153921	0
834	0	0	0	0	0	0
835	0	0	0	0	0	0
836	0	0	0.0504727	0	0.0252364	0
837	0.0923528	0	0	0	0.0461764	0
838	0.0153921	0	0.0841212	0	0.0497567	0
839	0.0153921	0	0.0841212	0	0.0497567	0
840	0.0307843	0	0.0168242	0	0.0238043	0
841	0	0	0	0	0	0
842	0	0	0	0	0	0
843	0.0461764	0	0.0168242	0	0.0315003	0
844	0.0307843	0	0	0	0.0153921	0
845	0.0307843	0	0	0	0.0153921	0
846	0.0153921	0	0.0168242	0	0.0161082	0
847	0	0	0.0168242	0	0.00841212	0
848	0	0	0	0	0	0
849	0	0	0.0336485	0	0.0168242	0
850	0.0307843	0	0	0	0.0153921	0
851	0.0153921	0	0.0168242	0	0.0161082	0
852	0.0923528	0	0.0336485	0	0.0630007	0
853	0	0	0.0504727	0	0.0252364	0
854	0	0	0.0168242	0	0.00841212	0
855	0.0307843	0	0.0504727	0	0.0406285	0
856	0	0	0.0336485	0	0.0168242	0
857	0	0	0	0	0	0
858	0	0	0	0	0	0
859	0.0923528	0	0	0	0.0461764	0
860	0	0	0	0	0	0
861	0.0153921	0	0	0	0.00769607	0
862	0	0	0	0	0	0
863	0.0461764	0	0.0336485	0	0.0399124	0
864	0	0	0.0168242	0	0.00841212	0
865	0	0	0	0	0	0
866	0	0	0	0	0	0
867	0	0	0.0504727	0	0.0252364	0
868	0	0	0	0	0	0
869	0.0307843	0	0.0504727	0	0.0406285	0
870	0	0	0	0	0	0
871	0.0923528	0	0.0168242	0	0.0545885	0
872	0.0923528	0	0	0	0.0461764	0
873	0	0	0.0168242	0	0.00841212	0
874	0.153921	0	0.168242	0	0.161082	0
875	0.0307843	0	0.0672969	0	0.0490406	0
876	0.0153921	0	0.0168242	0	0.0161082	0
877	0.0461764	0	0.0168242	0	0.0315003	0
878	0.123137	0	0	0	0.0615686	0
879	0	0	0.0168242	0	0.00841212	0
880	0	0	0	0	0	0
881	0.0153921	0	0	0	0.00769607	0
882	0.0923528	0	0.0841212	0	0.088237	0
883	0.0153921	0	0.0168242	0	0.0161082	0
884	0.0153921	0	0	0	0.00769607	0
885	0.0769607	0	0.0672969	0	0.0721288	0
886	0.0307843	0	0.0168242	0	0.0238043	0
887	0.0153921	0	0.0168242	0	0.0161082	0
888	0.0153921	0	0	0	0.00769607	0
889	0.200098	0	0.0672969	0	0.133697	0
890	0	0	0.0168242	0	0.00841212	0
891	0	0	0.0336485	0	0.0168242	0
892	0.384803	0	0.386957	0	0.38588	0
893	0	0	0	0	0	0
894	0	0	0	0	0	0
895	0.107745	0	0.185067	0	0.146406	0
896	0	0	0	0	0	0
897	0	0	0.0168242	0	0.00841212	0
898	0	0	0	0	0	0
899	0.0153921	0	0	0	0.00769607	0
900	0.0307843	0	0	0	0.0153921	0
901	0.0307843	0	0	0	0.0153921	0
902	0.0615686	0	0	0	0.0307843	0
903	0.0153921	0	0	0	0.00769607	0
904	0	0	0.0168242	0	0.00841212	0
905	0	0	0	0	0	0
906	0	0	0.0168242	0	0.00841212	0
907	0	0	0	0	0	0
908	0.0307843	0	0.0504727	0	0.0406285	0
909	0.0153921	0	0.0336485	0	0.0245203	0
910	0	0	0	0	0	0
911	0.0153921	0	0	0	0.00769607	0
912	0	0	0	0	0	0
913	0	0	0	0	0	0
914	0	0	0	0	0	0
915	0	0	0.0672969	0	0.0336485	0
916	0.0461764	0	0	0	0.0230882	0
917	0	0	0.0168242	0	0.00841212	0
918	0	0	0	0	0	0
919	0.0461764	0	0	0	0.0230882	0
920	0.0153921	0	0.0168242	0	0.0161082	0
921	0.0153921	0	0	0	0.00769607	0
922	0.0307843	0	0	0	0.0153921	0
923	0	0	0	0	0	0
924	0	0	0	0	0	0
925	0	0	0.0168242	0	0.00841212	0
926	0	0	0	0	0	0
927	0.0153921	0	0	0	0.00769607	0
928	0.0153921	0	0.0336485	0	0.0245203	0
929	0.0153921	0	0	0	0.00769607	0
930	0	0	0	0	0	0
931	0.0461764	0	0.0336485	0	0.0399124	0
932	0.123137	0	0.0672969	0	0.095217	0
933	0	0	0.0168242	0	0.00841212	0
934	0.0153921	0	0	0	0.00769607	0
935	0	0	0	0	0	0
936	0	0	0.0168242	0	0.00841212	0
937	0	0	0.0168242	0	0.00841212	0
938	0.0923528	0	0.0336485	0	0.0630007	0
939	0.0153921	0	0.0336485	0	0.0245203	0
940	0.0769607	0	0	0	0.0384803	0
941	0	0	0	0	0	0
942	0.200098	0	0.100945	0	0.150522	0
943	0.0307843	0	0.0168242	0	0.0238043	0
944	0.0153921	0	0.0168242	0	0.0161082	0
945	0.0153921	0	0	0	0.00769607	0
946	0	0	0	0	0	0
947	0	0	0	0	0	0
948	0.0307843	0	0	0	0.0153921	0
949	0.0307843	0	0.0168242	0	0.0238043	0
950	0	0	0.0168242	0	0.00841212	0
951	0.0923528	0	0.0672969	0	0.0798249	0
952	0	0	0	0	0	0
953	0.21549	0	0.286012	0	0.250751	0
954	0.153921	0	0.134594	0	0.144258	0
955	0.507941	0	0.31966	0	0.413801	0
956	0.0769607	0	0.0168242	0	0.0468925	0
957	0	0	0	0	0	0
958	0	0	0.0168242	0	0.00841212	0
959	0	0	0	0	0	0
960	0	0	0	0	0	0
961	0	0	0	0	0	0
962	0	0	0	0	0	0
963	0	0	0	0	0	0
964	0	0	0	0	0	0
965	0.0307843	0	0.0168242	0	0.0238043	0
966	0.0153921	0	0.0168242	0	0.0161082	0
967	0.0153921	0	0.0168242	0	0.0161082	0
968	0	0	0	0	0	0
969	0	0	0	0	0	0
970	0	0	0	0	0	0
971	0	0	0	0	0	0
972	0	0	0	0	0	0
973	0	0	0	0	0	0
974	0.0153921	0	0	0	0.00769607	0
975	0.0307843	0	0.0336485	0	0.0322164	0
976	0	0	0	0	0	0
977	0	0	0	0	0	0
978	0	0	0	0	0	0
979	0	0	0	0	0	0
980	0	0	0	0	0	0
981	0	0	0	0	0	0
982	0	0	0	0	0	0
983	0	0	0	0	0	0
984	0	0	0	0	0	0
985	0	0	0	0	0	0
986	0	0	0	0	0	0
987	0	0	0	0	0	0
988	0	0	0	0	0	0
989	0	0	0	0	0	0
990	0	0	0	0	0	0
991	0	0	0	0	0	0
992	0	0	0	0	0	0
993	0	0	0	0	0	0
994	0	0	0	0	0	0
995	0	0	0	0	0	0
996	0	0	0	0	0	0
997	0	0	0	0	0	0
998	0	0	0	0	0	0
999	0	0	0	0	0	0
1000	0	0	0	0	0	0
1001	0	0	0	0	0	0
1002	0	0	0	0	0	0
1003	0	0	0	0	0	0
1004	0	0	0	0	0	0
1005	0	0	0	0	0	0
1006	0	0	0	0	0	0
1007	0	0	0	0	0	0
1008	0	0	0	0	0	0
1009	0	0	0	0	0	0
1010	0	0	0	0	0	0
1011	0	0	0	0	0	0
1012	0	0	0	0	0	0
1013	0	0	0	0	0	0
1014	0	0	0	0	0	0
1015	0	0	0	0	0	0
1016	0	0	0	0	0	0
1017	0	0	0	0	0	0
1018	0	0	0	0	0	0
1019	0	0	0	0	0	0
1020	0	0	0	0	0	0
1021	0	0	0	0	0	0
1022	0	0	0	0	0	0
1023	0	0	0	0	0	0
1024	0	0	0	0	0	0
1025	0	0	0	0	0	0
1026	0	0	0	0	0	0
1027	0	0	0	0	0	0
1028	0	0	0	0	0	0
1029	0	0	0	0	0	0
1030	0	0	0	0	0	0
1031	0	0	0	0	0	0
1032	0	0	0	0	0	0
1033	0	0	0	0	0	0
1034	0	0	0	0	0	0
1035	0	0	0	0	0	0
1036	0	0	0	0	0	0
1037	0	0	0	0	0	0
1038	0	0	0	0	0	0
1039	0	0	0	0	0	0
1040	0	0	0	0	0	0
1041	0	0	0	0	0	0
1042	0	0	0	0	0	0
1043	0	0	0	0	0	0
1044	0	0	0	0	0	0
1045	0	0	0	0	0	0
1046	0	0	0	0	0	0
1047	0	0	0	0	0	0
1048	0	0	0	0	0	0
1049	0	0	0	0	0	0
1050	0	0	0	0	0	0
1051	0	0	0	0	0	0
1052	0	0	0	0	0	0
1053	0	0	0	0	0	0
1054	0	0	0	0	0	0
1055	0	0	0	0	0	0
1056	0	0	0	0	0	0
1057	0	0	0	0	0	0
1058	0	0	0	0	0	0
1059	0	0	0	0	0	0
1060	0	0	0	0	0	0
1061	0	0	0	0	0	0
1062	0	0	0	0	0	0
1063	0	0	0	0	0	0
1064	0	0	0	0	0	0
1065	0	0	0	0	0	0
1066	0	0	0	0	0	0
1067	0	0	0	0	0	0
1068	0	0	0	0	0	0
1069	0	0	0	0	0	0
1070	0	0	0	0	0	0
1071	0	0	0	0	0	0
1072	0	0	0	0	0	0
1073	0	0	0	0	0	0
1074	0	0	0	0	0	0
1075	0	0	0	0	0	0
1076	0	0	0	0	0	0
1077	0	0	0	0	0	0
1078	0	0	0	0	0	0
1079	0	0	0	0	0	0
1080	0	0	0	0	0	0
1081	0	0	0	0	0	0
1082	0	0	0	0	0	0
1083	0	0	0	0	0	0
1084	0	0	0	0	0	0
1085	0	0	0	0	0	0
1086	0	0	0	0	0	0
1087	0	0	0	0	0	0
1088	0	0	0	0	0	0
1089	0	0	0	0	0	0
1090	0	0	0	0	0	0
1091	0	0	0	0	0	0
1092	0	0	0	0	0	0
1093	0	0	0	0	0	0
1094	0	0	0	0	0	0
1095	0	0	0	0	0	0
1096	0	0	0	0	0	0
1097	0	0	0	0	0	0
1098	0	0	0	0	0	0
1099	0	0	0	0	0	0
1100	0	0	0	0	0	0
1101	0	0	0	0	0	0
1102	0	0	0	0	0	0
1103	0	0	0	0	0	0
1104	0	0	0	0	0	0
1105	0	-0.0153921	0	0	0	-0.00769607
1106	0	-0.0153921	0	-0.0168242	0	-0.0161082
1107	0	0	0	0	0	0
1108	0	0	0	0	0	0
1109	0	-0.0615686	0	-0.0168242	0	-0.0391964
1110	0	0	0	0	0	0
1111	0	0	0	0	0	0
1112	0	0	0	0	0	0
1113	0	0	0	-0.0168242	0	-0.00841212
1114	0	0	0	-0.0168242	0	-0.00841212
1115	0	-0.0923528	0	-0.0841212	0	-0.088237
1116	0	0	0	-0.0168242	0	-0.00841212
1117	0	0	0	-0.0168242	0	-0.00841212
1118	0	-0.0307843	0	0	0	-0.0153921
1119	0	-0.0307843	0	-0.0168242	0	-0.0238043
1120	0	-0.0615686	0	0	0	-0.0307843
1121	0	0	0	0	0	0
1122	0	0	0	0	0	0
1123	0	-0.0153921	0	-0.0336485	0	-0.0245203
1124	0	0	0	-0.0168242	0	-0.00841212
1125	0	0	0	0	0	0
1126	0	-0.0153921	0.0168242	-0.0336485	0.00841212	-0.0245203
1127	0	-0.0615686	0	-0.0336485	0	-0.0476085
1128	0	0	0	0	0	0
1129	0	-0.153921	0	-0.100945	0	-0.127433
1130	0	-0.0153921	0	0	0	-0.00769607
1131	0	-0.0153921	0	-0.0336485	0	-0.0245203
1132	0	0	0	0	0	0
1133	0	0	0	0	0	0
1134	0	0	0	-0.0168242	0	-0.00841212
1135	0	0	0	0	0	0
1136	0	0	0	0	0	0
1137	0	-0.0153921	0	0	0	-0.00769607
1138	0	0	0	0	0	0
1139	0	0	0	0	0	0
1140	0	0	0	0	0	0
1141	0	-0.0307843	0	-0.0336485	0	-0.0322164
1142	0	0	0	0	0	0
1143	0	0	0	0	0	0
1144	0	-0.0461764	0	-0.0336485	0	-0.0399124
1145	0	0	0	0	0	0
1146	0	0	0	0	0	0
1147	0	-0.0153921	0	0	0	-0.00769607
1148	0	0	0	0	0	0
1149	0	0	0	0	0	0
1150	0	0	0	0	0	0
1151	0	-0.0461764	0	-0.0168242	0	-0.0315003
1152	0	0	0	0	0	0
1153	0	-0.0461764	0	0	0	-0.0230882
1154	0	0	0	0	0	0
1155	0	-0.0153921	0	0	0	-0.00769607
1156	0	0	0	0	0	0
1157	0	0	0	-0.0168242	0	-0.00841212
1158	0	0	0	-0.0168242	0	-0.00841212
1159	0	-0.0153921	0	0	0	-0.00769607
1160	0	0	0	0	0	0
1161	0	-0.0153921	0	-0.0336485	0	-0.0245203
1162	0	-0.0153921	0	-0.0168242	0	-0.0161082
1163	0	-0.169314	0	-0.151418	0	-0.160366
1164	0.0307843	-0.277059	0	-0.185067	0.0153921	-0.231063
1165	0	-0.0461764	0	-0.0168242	0	-0.0315003
1166	0	-0.123137	0	-0.0336485	0	-0.0783928
1167	0	-0.0461764	0	-0.0672969	0	-0.0567367
1168	0	-0.0461764	0	-0.0504727	0	-0.0483246
1169	0	-0.0769607	0	-0.0168242	0	-0.0468925
1170	0	0	0	0	0	0
1171	0	0	0	0	0	0
1172	0	-0.0153921	0	-0.0504727	0	-0.0329324
1173	0	0	0	0	0	0
1174	0	-0.0153921	0	0	0	-0.00769607
1175	0	0	0	0	0	0
1176	0	-0.0461764	0	-0.0504727	0	-0.0483246
1177	0	0	0	0	0	0
1178	0	0	0	0	0	0
1179	0	0	0	-0.0168242	0	-0.00841212
1180	0	0	0	0	0	0
1181	0	-0.0153921	0	0	0	-0.00769607
1182	0	0	0	0	0	0
1183	0	-0.0307843	0	-0.0168242	0	-0.0238043
1184	0	0	0	0	0	0
1185	0	0	0	0	0	0
1186	0	0	0	-0.0336485	0	-0.0168242
1187	0	0	0	0	0	0
1188	0	0	0	0	0	0
1189	0	0	0	0	0	0
1190	0	0	0	0	0	0
1191	0	0	0	0	0	0
1192	0	0	0	0	0	0
1193	0	-0.0769607	0	0	0	-0.0384803
1194	0	0	0	0	0	0
1195	0	0	0	0	0	0
1196	0	0	0	0	0	0
1197	0	0	0	0	0	0
1198	0	0	0	-0.0168242	0	-0.00841212
1199	0	0	0	0	0	0
1200	0	0	0	0	0	0
1201	0	0	0	0	0	0
1202	0	0	0	0	0	0
1203	0	0	0	0	0	0
1204	0	-0.0461764	0	-0.0168242	0	-0.0315003
1205	0	-0.0461764	0	0	0	-0.0230882
1206	0	-0.0461764	0	-0.0504727	0	-0.0483246
1207	0	-0.0307843	0	-0.0504727	0	-0.0406285
1208	0	-0.0307843	0.0168242	-0.0504727	0.00841212	-0.0406285
1209	0	0	0	0	0	0
1210	0	0	0	-0.0168242	0	-0.00841212
1211	0	0	0	0	0	0
1212	0	-0.0153921	0	0	0	-0.00769607
1213	0	0	0	0	0	0
1214	0	0	0	0	0	0
1215	0	0	0	-0.0168242	0	-0.00841212
1216	0	0	0	0	0	0
1217	0	-0.0153921	0	0	0	-0.00769607
1218	0	0	0	0	0	0
1219	0	-0.0615686	0	-0.0504727	0	-0.0560206
1220	0	0	0	0	0	0
1221	0	-0.0153921	0	0	0	-0.00769607
1222	0	-0.0307843	0	0	0	-0.0153921
1223	0	0	0	-0.0168242	0	-0.00841212
1224	0	0	0	0	0	0
1225	0	0	0	0	0	0
1226	0	0	0	0	0	0
1227	0	-0.0153921	0	-0.0504727	0	-0.0329324
1228	0	0	0	0	0	0
1229	0	0	0	0	0	0
1230	0	0	0	-0.0168242	0	-0.00841212
1231	0	-0.0153921	0	-0.0168242	0	-0.0161082
1232	0	0	0	-0.0168242	0	-0.00841212
1233	0	-0.0769607	0	-0.100945	0	-0.0889531
1234	0	-0.0153921	0	-0.0168242	0	-0.0161082
1235	0	-0.0923528	0	-0.0168242	0	-0.0545885
1236	0	-0.0153921	0	-0.0168242	0	-0.0161082
1237	0	-0.0307843	0	-0.0168242	0	-0.0238043
1238	0	-0.0307843	0	-0.0336485	0	-0.0322164
1239	0	-0.0769607	0	-0.0336485	0	-0.0553046
1240	0	0	0	0	0	0
1241	0	0	0	0	0	0
1242	0	0	0	0	0	0
1243	0	0	0	0	0	0
1244	0	0	0	-0.0168242	0	-0.00841212
1245	0	-0.123137	0	-0.0504727	0	-0.0868049
1246	0	-0.0923528	0	-0.0504727	0	-0.0714128
1247	0	-0.0923528	0	-0.100945	0	-0.0966491
1248	0	-0.0307843	0	-0.0168242	0	-0.0238043
1249	0	-0.0153921	0	-0.0168242	0	-0.0161082
1250	0	-0.184706	0	-0.11777	0	-0.151238
1251	0	-0.0153921	0	0	0	-0.00769607
1252	0	0	0	-0.0168242	0	-0.00841212
1253	0	-0.0307843	0	-0.0336485	0	-0.0322164
1254	0	0	0	-0.0336485	0	-0.0168242
1255	0	-0.0461764	0	0	0	-0.0230882
1256	0	-0.0153921	0	-0.0168242	0	-0.0161082
1257	0	-0.0769607	0	-0.0504727	0	-0.0637167
1258	0	-0.200098	0	-0.11777	0	-0.158934
1259	0	0	0	-0.0168242	0	-0.00841212
1260	0	-0.0615686	0	-0.0841212	0	-0.0728449
1261	0	0	0	0	0	0
1262	0	0	0	0	0	0
1263	0	0	0	0	0	0
1264	0	0	0	0	0	0
1265	0	-0.0769607	0	-0.0168242	0	-0.0468925
1266	0	0	0	0	0	0
1267	0	0	0	0	0	0
1268	0	-0.369411	0	-0.386957	0	-0.378184
1269	0	-0.0153921	0	-0.0336485	0	-0.0245203
1270	0	-0.123137	0	-0.100945	0	-0.112041
1271	0	-0.0461764	0	-0.0168242	0	-0.0315003
1272	0	-0.0153921	0	0	0	-0.00769607
1273	0	0	0	0	0	0
1274	0	-0.0153921	0	-0.0168242	0	-0.0161082
1275	0	0	0	0	0	0
1276	0	-0.138529	0	-0.134594	0	-0.136562
1277	0	-0.0307843	0	0	0	-0.0153921
1278	0.0307843	-0.0153921	0	0	0.0153921	-0.00769607
1279	0	0	0	0	0	0
1280	0	-0.0153921	0	0	0	-0.00769607
1281	0	-0.0153921	0	0	0	-0.00769607
1282	0	0	0	-0.0168242	0	-0.00841212
1283	0	-0.0153921	0	0	0	-0.00769607
1284	0	0	0	0	0	0
1285	0	0	0	0	0	0
1286	0	-0.0153921	0	0	0	-0.00769607
1287	0	-0.0153921	0	0	0	-0.00769607
1288	0	0	0	-0.0168242	0	-0.00841212
1289	0	-0.0153921	0	-0.0168242	0	-0.0161082
1290	0	-0.0153921	0	-0.0168242	0	-0.0161082
1291	0	-0.123137	0	-0.0841212	0	-0.103629
1292	0	-0.0769607	0	-0.0168242	0	-0.0468925
1293	0	-0.0153921	0	-0.0168242	0	-0.0161082
1294	0	0	0	-0.0168242	0	-0.00841212
1295	0	0	0	-0.0168242	0	-0.00841212
1296	0	-0.0307843	0	0	0	-0.0153921
1297	0	-0.0307843	0	0	0	-0.0153921
1298	0	-0.0615686	0	-0.0168242	0	-0.0391964
1299	0	0	0	0	0	0
1300	0	0	0	0	0	0
1301	0	0	0	0	0	0
1302	0	-0.0153921	0	-0.0672969	0	-0.0413445
1303	0	-0.0461764	0	-0.11777	0	-0.081973
1304	0	-0.0923528	0	-0.0336485	0	-0.0630007
1305	0	-0.0461764	0	-0.0168242	0	-0.0315003
1306	0	-0.0461764	0	-0.0841212	0	-0.0651488
1307	0	-0.0615686	0	-0.0168242	0	-0.0391964
1308	0	-0.0307843	0	-0.0336485	0	-0.0322164
1309	0	-0.0307843	0	-0.0336485	0	-0.0322164
1310	0	0	0	-0.0168242	0	-0.00841212
1311	0	-0.0153921	0	-0.0336485	0	-0.0245203
1312	0	-0.0153921	0	-0.0168242	0	-0.0161082
1313	0	0	0	0	0	0
1314	0	-0.123137	0	-0.0168242	0	-0.0699807
1315	0	-0.0461764	0	-0.0841212	0	-0.0651488
1316	0	-0.0153921	0	0	0	-0.00769607
1317	0	-0.0153921	0	0	0	-0.00769607
1318	0	-0.0769607	0	-0.11777	0	-0.0973652
1319	0	-0.0307843	0	-0.0336485	0	-0.0322164
1320	0	0	0	0	0	0
1321	0	-0.0461764	0	0	0	-0.0230882
1322	0	0	0	-0.0168242	0	-0.00841212
1323	0	-0.0153921	0	0	0	-0.00769607
1324	0	-0.0461764	0	-0.0336485	0	-0.0399124
1325	0	-0.0307843	0	-0.0336485	0	-0.0322164
1326	0	-0.0307843	0	-0.0168242	0	-0.0238043
1327	0	-0.43098	0	-0.353309	0	-0.392144
1328	0	0	0	0	0	0
1329	0	0	0	-0.0168242	0	-0.00841212
1330	0	-0.0307843	0	0	0	-0.0153921
1331	0	-0.0307843	0	0	0	-0.0153921
1332	0	-0.0153921	0	-0.0168242	0	-0.0161082
1333	0	0	0	-0.0168242	0	-0.00841212
1334	0	-0.0307843	0	0	0	-0.0153921
1335	0	-0.123137	0	-0.0504727	0	-0.0868049
1336	0	-0.0153921	0	0	0	-0.00769607
1337	0	-0.0153921	0	0	0	-0.00769607
1338	0	-0.0615686	0	-0.0504727	0	-0.0560206
1339	0	-0.0615686	0	-0.0336485	0	-0.0476085
1340	0	0	0	0	0	0
1341	0	0	0	-0.0168242	0	-0.00841212
1342	0	-0.0153921	0	0	0	-0.00769607
1343	0	-0.0615686	0	-0.0336485	0	-0.0476085
1344	0	0	0	-0.100945	0	-0.0504727
1345	0	-0.0153921	0	-0.0672969	0	-0.0413445
1346	0	-0.0307843	0	0	0	-0.0153921
1347	0	0	0	-0.0168242	0	-0.00841212
1348	0	-0.0307843	0	-0.0168242	0	-0.0238043
1349	0	-0.0153921	0	0	0	-0.00769607
1350	0	-0.0769607	0	-0.0336485	0	-0.0553046
1351	0	0	0	0	0	0
1352	0	0	0	0	0	0
1353	0	0	0	-0.0168242	0	-0.00841212
1354	0	-0.200098	0	-0.168242	0	-0.18417
1355	0	0	0	0	0	0
1356	0	-0.0153921	0	-0.0168242	0	-0.0161082
1357	0	-0.0307843	0	-0.0504727	0	-0.0406285
1358	0	0	0	0	0	0
1359	0	-0.0769607	0	-0.0841212	0	-0.0805409
1360	0.0153921	-0.200098	0	-0.0841212	0.00769607	-0.142109
1361	0	0	0	0	0	0
1362	0	-0.0307843	0	-0.0504727	0	-0.0406285
1363	0	-0.0923528	0	-0.0504727	0	-0.0714128
1364	0	-0.0615686	0	-0.0168242	0	-0.0391964
1365	0	-0.0923528	0	-0.0168242	0	-0.0545885
1366	0	0	0	-0.0168242	0	-0.00841212
1367	0	0	0	-0.0168242	0	-0.00841212
1368	0	0	0	0	0	0
1369	0	0	0	0	0	0
1370	0	-0.0153921	0	-0.0336485	0	-0.0245203
1371	0	-0.0615686	0	-0.0168242	0	-0.0391964
1372	0	0	0	0	0	0
1373	0	-0.0153921	0	-0.0168242	0	-0.0161082
1374	0	-0.0923528	0	-0.0336485	0	-0.0630007
1375	0	-0.0307843	0	0	0	-0.0153921
1376	0	-0.0615686	0	0	0	-0.0307843
1377	0	-0.0307843	0	-0.0336485	0	-0.0322164
1378	0	0	0	0	0	0
1379	0	-0.0153921	0	-0.0336485	0	-0.0245203
1380	0	-0.0615686	0	-0.0168242	0	-0.0391964
1381	0	-0.0153921	0	-0.0504727	0	-0.0329324
1382	0	-0.0615686	0	-0.0504727	0	-0.0560206
1383	0	0	0	0	0	0
1384	0	-0.0307843	0	0	0	-0.0153921
1385	0	0	0	-0.0168242	0	-0.00841212
1386	0	-0.138529	0	-0.0504727	0	-0.094501
1387	0.0153921	-0.0923528	0	-0.0841212	0.00769607	-0.088237
1388	0	-0.0153921	0	-0.0168242	0	-0.0161082
1389	0	-0.0615686	0	-0.0336485	0	-0.0476085
1390	0	0	0	0	0	0
1391	0	-0.200098	0	-0.0336485	0	-0.116873
1392	0	0	0	0	0	0
1393	0	0	0	0	0	0
1394	0	-0.0153921	0	-0.0168242	0	-0.0161082
1395	0	-0.0153921	0	-0.0168242	0	-0.0161082
1396	0	-0.0307843	0	-0.0168242	0	-0.0238043
1397	0	-0.0769607	0	-0.0168242	0	-0.0468925
1398	0	0	0	0	0	0
1399	0	-0.0153921	0	-0.0168242	0	-0.0161082
1400	0	-0.0307843	0	-0.0336485	0	-0.0322164
1401	0	0	0	0	0	0
1402	0	0	0	-0.0672969	0	-0.0336485
1403	0	0	0	-0.0841212	0	-0.0420606
1404	0	0	0	-0.0336485	0	-0.0168242
1405	0	0	0	0	0	0
1406	0	-0.0153921	0	0	0	-0.00769607
1407	0	-0.0769607	0	-0.0336485	0	-0.0553046
1408	0	-0.0615686	0	-0.0336485	0	-0.0476085
1409	0	0	0	-0.0168242	0	-0.00841212
1410	0	0	0	0	0	0
1411	0	0	0	0	0	0
1412	0	0	0	0	0	0
1413	0	0	0	-0.0168242	0	-0.00841212
1414	0	0	0	0	0	0
1415	0	0	0	0	0	0
1416	0	-0.0769607	0	0	0	-0.0384803
1417	0	-0.0153921	0	0	0	-0.00769607
1418	0	-0.0153921	0	0	0	-0.00769607
1419	0	-0.169314	0	-0.0841212	0	-0.126717
1420	0	-0.0307843	0	-0.0504727	0	-0.0406285
1421	0	0	0	0	0	0
1422	0	-0.0769607	0	-0.134594	0	-0.105777
1423	0	-0.0461764	0	-0.0504727	0	-0.0483246
1424	0	-0.0461764	0	0	0	-0.0230882
1425	0	-0.0923528	0	-0.0336485	0	-0.0630007
1426	0	0	0	-0.0336485	0	-0.0168242
1427	0	0	0	0	0	0
1428	0	0	0	0	0	0
1429	0	0	0	0	0	0
1430	0	-0.0153921	0	0	0	-0.00769607
1431	0	0	0	0	0	0
1432	0	-0.0615686	0	0	0	-0.0307843
1433	0	-0.123137	0	-0.0336485	0	-0.0783928
1434	0	-0.21549	0	-0.100945	0	-0.158218
1435	0	-0.400196	0	-0.11777	0	-0.258983
1436	0	-0.0153921	0	-0.0168242	0	-0.0161082
1437	0	0	0	0	0	0
1438	0	-0.0615686	0	-0.0336485	0	-0.0476085
1439	0	-0.0461764	0	-0.0504727	0	-0.0483246
1440	0	-0.0461764	0	0	0	-0.0230882
1441	0	-0.0461764	0	0	0	-0.0230882
1442	0	0	0	0	0	0
1443	0	0	0	0	0	0
1444	0	0	0	0	0	0
1445	0	-0.0153921	0	0	0	-0.00769607
1446	0	0	0	0	0	0
1447	0	-0.0307843	0	0	0	-0.0153921
1448	0	0	0	-0.0168242	0	-0.00841212
1449	0	-0.123137	0	-0.0504727	0	-0.0868049
1450	0	0	0	0	0	0
1451	0	-0.0153921	0	0	0	-0.00769607
1452	0	-0.0153921	0	0	0	-0.00769607
1453	0	-0.0307843	0	-0.0168242	0	-0.0238043
1454	0	-0.0769607	0	-0.0336485	0	-0.0553046
1455	0	-0.0153921	0	-0.0168242	0	-0.0161082
1456	0	-0.0153921	0	-0.0168242	0	-0.0161082
1457	0	-0.107745	0	0	0	-0.0538725
1458	0	-0.0769607	0	-0.0168242	0	-0.0468925
1459	0	-0.0307843	0	0	0	-0.0153921
1460	0	-0.0307843	0	-0.0336485	0	-0.0322164
1461	0	0	0	-0.0168242	0	-0.00841212
1462	0	-0.0153921	0	0	0	-0.00769607
1463	0	-0.0923528	0	-0.0504727	0	-0.0714128
1464	0	-0.0307843	0	-0.0504727	0	-0.0406285
1465	0	-0.0461764	0	-0.0168242	0	-0.0315003
1466	0	-0.0769607	0	-0.0336485	0	-0.0553046
1467	0	-0.0615686	0	-0.0168242	0	-0.0391964
1468	0	-0.0461764	0	-0.0672969	0	-0.0567367
1469	0	-0.0923528	0	-0.0504727	0	-0.0714128
1470	0	-0.0307843	0	0	0	-0.0153921
1471	0	0	0	0	0	0
1472	0	-0.0615686	0	-0.0672969	0	-0.0644327
1473	0	0	0	0	0	0
1474	0	-0.0461764	0	-0.0841212	0	-0.0651488
1475	0	-0.0461764	0	-0.0336485	0	-0.0399124
1476	0	-0.123137	0	-0.0336485	0	-0.0783928
1477	0	-0.0769607	0	-0.0168242	0	-0.0468925
1478	0	0	0	-0.0168242	0	-0.00841212
1479	0	0	0	0	0	0
1480	0	0	0	0	0	0
1481	0	0	0	0	0	0
1482	0	-0.0153921	0	-0.0168242	0	-0.0161082
1483	0	-0.169314	0	-0.0336485	0	-0.101481
1484	0	-0.0153921	0	0	0	-0.00769607
1485	0	0	0	-0.0168242	0	-0.00841212
1486	0	0	0	0	0	0
1487	0	-0.0769607	0	-0.0672969	0	-0.0721288
1488	0	0	0	-0.0336485	0	-0.0168242
1489	0	-0.0461764	0	0	0	-0.0230882
1490	0	-0.107745	0	-0.134594	0	-0.121169
1491	0	0	0	0	0	0
1492	0	-0.0153921	0	0	0	-0.00769607
1493	0	0	0	-0.0336485	0	-0.0168242
1494	0	-0.0461764	0	0	0	-0.0230882
1495	0	-0.0615686	0	-0.0168242	0	-0.0391964
1496	0	-0.0615686	0	-0.168242	0	-0.114905
1497	0	0	0	0	0	0
1498	0	-0.0153921	0	-0.0168242	0	-0.0161082
1499	0	-0.0461764	0	0	0	-0.0230882
1500	0	0	0	-0.0168242	0	-0.00841212
1501	0	-0.0461764	0	0	0	-0.0230882
1502	0	-0.0153921	0	-0.0504727	0	-0.0329324
1503	0	-0.0307843	0	-0.0504727	0	-0.0406285
1504	0	-0.0307843	0	-0.0672969	0	-0.0490406
1505	0	0	0	-0.0168242	0	-0.00841212
1506	0	-0.0615686	0	-0.0168242	0	-0.0391964
1507	0	-0.0153921	0	-0.100945	0	-0.0581688
1508	0	-0.0153921	0	-0.0336485	0	-0.0245203
1509	0	-0.0615686	0	0	0	-0.0307843
1510	0	-0.0615686	0	-0.0168242	0	-0.0391964
1511	0	-0.0615686	0	0	0	-0.0307843
1512	0	0	0	0	0	0
1513	0	0	0	-0.0336485	0	-0.0168242
1514	0	0	0	0	0	0
1515	0	-0.0615686	0	-0.0336485	0	-0.0476085
1516	0	0	0	0	0	0
1517	0	-0.0461764	0	0	0	-0.0230882
1518	0	-0.0923528	0	-0.0336485	0	-0.0630007
1519	0	-0.0153921	0	-0.0336485	0	-0.0245203
1520	0	0	0	0	0	0
1521	0	-0.0923528	0	-0.11777	0	-0.105061
1522	0	-0.0153921	0	0	0	-0.00769607
1523	0	-0.0153921	0	-0.0168242	0	-0.0161082
1524	0	0	0	0	0	0
1525	0	0	0	0	0	0
1526	0	-0.0153921	0	0	0	-0.00769607
1527	0	0	0	0	0	0
1528	0	-0.0769607	0	-0.0336485	0	-0.0553046
1529	0	0	0	-0.0168242	0	-0.00841212
1530	0	0	0	0	0	0
1531	0	-0.0461764	0	0	0	-0.0230882
1532	0	0	0	0	0	0
1533	0	-0.0153921	0	-0.0168242	0	-0.0161082
1534	0	-0.0307843	0	-0.0504727	0	-0.0406285
1535	0	-0.0307843	0	-0.0504727	0	-0.0406285
1536	0	-0.0307843	0	0	0	-0.0153921
1537	0	-0.0461764	0	0	0	-0.0230882
1538	0	0	0	0	0	0
1539	0	-0.169314	0	-0.0841212	0	-0.126717
1540	0	-0.0153921	0	0	0	-0.00769607
1541	0	-0.0615686	0	-0.0336485	0	-0.0476085
1542	0	-0.153921	0	0	0	-0.0769607
1543	0	0	0	0	0	0
1544	0	0	0	0	0	0
1545	0	0	0	-0.0504727	0	-0.0252364
1546	0	-0.0923528	0	-0.0841212	0	-0.088237
1547	0	0	0	-0.0168242	0	-0.00841212
1548	0	-0.0307843	0	0	0	-0.0153921
1549	0	-0.0153921	0	-0.0168242	0	-0.0161082
1550	0	-0.0153921	0	-0.0168242	0	-0.0161082
1551	0	-0.0153921	0	-0.0168242	0	-0.0161082
1552	0	0	0	0	0	0
1553	0	-0.0153921	0	0	0	-0.00769607
1554	0	0	0	0	0	0
1555	0	-0.0307843	0	-0.0672969	0	-0.0490406
1556	0	-0.0307843	0	0	0	-0.0153921
1557	0	-0.0461764	0	-0.0168242	0	-0.0315003
1558	0	-0.0307843	0	0	0	-0.0153921
1559	0	-0.0923528	0	-0.0168242	0	-0.0545885
1560	0	0	0	0	0	0
1561	0	-0.0153921	0	0	0	-0.00769607
1562	0	-0.107745	0	-0.0168242	0	-0.0622846
1563	0	-0.0153921	0	0	0	-0.00769607
1564	0	0	0	-0.0168242	0	-0.00841212
1565	0	-0.0769607	0	-0.100945	0	-0.0889531
1566	0	-0.0769607	0	-0.0672969	0	-0.0721288
1567	0	-0.0153921	0	0	0	-0.00769607
1568	0	0	0	0	0	0
1569	0	-0.0153921	0.0168242	-0.0504727	0.00841212	-0.0329324
1570	0	-0.0153921	0	0	0	-0.00769607
1571	0	0	0	-0.0504727	0	-0.0252364
1572	0	0	0	0	0	0
1573	0	0	0	-0.0168242	0	-0.00841212
1574	0	-0.0153921	0	0	0	-0.00769607
1575	0	-0.0307843	0	-0.0168242	0	-0.0238043
1576	0	-0.0153921	0	-0.0504727	0	-0.0329324
1577	0	-0.0307843	0	0	0	-0.0153921
1578	0	-0.0153921	0	-0.0168242	0	-0.0161082
1579	0	-0.0307843	0	0	0	-0.0153921
1580	0	-0.0307843	0	-0.0168242	0	-0.0238043
1581	0	-0.0153921	0	0	0	-0.00769607
1582	0	-0.0153921	0	-0.0336485	0	-0.0245203
1583	0	-0.0615686	0	-0.0168242	0	-0.0391964
1584	0	0	0	-0.0168242	0	-0.00841212
1585	0	0	0	-0.0168242	0	-0.00841212
1586	0	-0.0153921	0	0	0	-0.00769607
1587	0	-0.107745	0	-0.0504727	0	-0.0791088
1588	0	-0.0153921	0	-0.0168242	0	-0.0161082
1589	0	-0.0615686	0	-0.0168242	0	-0.0391964
1590	0	0	0	0	0	0
1591	0	0	0	0	0	0
1592	0	0	0	0	0	0
1593	0	-0.0307843	0	0	0	-0.0153921
1594	0	-0.0769607	0	-0.100945	0	-0.0889531
1595	0	0	0	0	0	0
1596	0	-0.0153921	0	-0.0168242	0	-0.0161082
1597	0	-0.0769607	0	0	0	-0.0384803
1598	0	-0.0153921	0	-0.0168242	0	-0.0161082
1599	0	-0.0153921	0	-0.0168242	0	-0.0161082
1600	0	-0.123137	0	-0.0336485	0	-0.0783928
1601	0	0	0	-0.0168242	0	-0.00841212
1602	0	0	0	-0.0168242	0	-0.00841212
1603	0	0	0	0	0	0
1604	0	-0.169314	0	-0.11777	0	-0.143542
1605	0	0	0	0	0	0
1606	0	-0.0615686	0	-0.0336485	0	-0.0476085
1607	0	-0.0307843	0	0	0	-0.0153921
1608	0	-0.0461764	0	0	0	-0.0230882
1609	0	0	0	0	0	0
1610	0	-0.0307843	0	-0.0504727	0	-0.0406285
1611	0	0	0	0	0	0
1612	0	0	0	0	0	0
1613	0	0	0	0	0	0
1614	0	0	0	0	0	0
1615	0	0	0	0	0	0
1616	0	-0.0615686	0	0	0	-0.0307843
1617	0	0	0	-0.0168242	0	-0.00841212
1618	0	-0.0153921	0	-0.0168242	0	-0.0161082
1619	0	0	0	0	0	0
1620	0	-0.0153921	0	0	0	-0.00769607
1621	0	0	0	0	0	0
1622	0	-0.0153921	0	0	0	-0.00769607
1623	0	-0.0153921	0	-0.0841212	0	-0.0497567
1624	0	0	0	0	0	0
1625	0	0	0	0	0	0
1626	0	0	0	0	0	0
1627	0	-0.0307843	0	-0.0168242	0	-0.0238043
1628	0	0	0	0	0	0
1629	0	-0.0153921	0	-0.0336485	0	-0.0245203
1630	0	-0.0307843	0	-0.0168242	0	-0.0238043
1631	0	-0.0153921	0	0	0	-0.00769607
1632	0	-0.0153921	0	0	0	-0.00769607
1633	0	0	0	0	0	0
1634	0	-0.0153921	0	-0.0168242	0	-0.0161082
1635	0	0	0	0	0	0
1636	0	0	0	0	0	0
1637	0	0	0	0	0	0
1638	0	-0.0307843	0	0	0	-0.0153921
1639	0	0	0	-0.0168242	0	-0.00841212
1640	0	0	0	0	0	0
1641	0	0	0	0	0	0
1642	0	-0.0307843	0	0	0	-0.0153921
1643	0	-0.0153921	0	0	0	-0.00769607
1644	0	-0.0153921	0	-0.0168242	0	-0.0161082
1645	0	-0.0461764	0	0	0	-0.0230882
1646	0	-0.0153921	0	0	0	-0.00769607
1647	0	0	0	0	0	0
1648	0	0	0	0	0	0
1649	0	0	0	0	0	0
1650	0	-0.0307843	0	-0.0168242	0	-0.0238043
1651	0	0	0	0	0	0
1652	0	0	0	0	0	0
1653	0	0	0	0	0	0
1654	0	0	0	0	0	0
1655	0	0	0	-0.0336485	0	-0.0168242
1656	0	-0.0307843	0	-0.0168242	0	-0.0238043
1657	0	0	0	0	0	0
1658	0	0	0	0	0	0
1659	0	0	0	0	0	0
1660	0	0	0	0	0	0
1661	0	-0.0307843	0	0	0	-0.0153921
1662	0	-0.0461764	0	-0.0336485	0	-0.0399124
1663	0	0	0	0	0	0
1664	0	0	0	0	0	0
1665	0	-0.0153921	0	0	0	-0.00769607
1666	0	0	0	0	0	0
1667	0	0	0	-0.0168242	0	-0.00841212
1668	0	0	0	0	0	0
1669	0	0	0	-0.0336485	0	-0.0168242
1670	0	0	0	0	0	0
1671	0	0	0	0	0	0
1672	0	0	0	0	0	0
1673	0	0	0	0	0	0
1674	0	-0.0461764	0	0	0	-0.0230882
1675	0	-0.0307843	0	0	0	-0.0153921
1676	0	-0.0153921	0	-0.0841212	0	-0.0497567
1677	0	0	0	0	0	0
1678	0	0	0	0	0	0
1679	0	0	0	0	0	0
1680	0	-0.0307843	0	0	0	-0.0153921
1681	0	-0.0615686	0	-0.0672969	0	-0.0644327
1682	0	0	0	0	0	0
1683	0	0	0	0	0	0
1684	0	0	0	0	0	0
1685	0	0	0	0	0	0
1686	0	-0.0769607	0	-0.0504727	0	-0.0637167
1687	0	-0.0769607	0	-0.0504727	0	-0.0637167
1688	0	0	0	0	0	0
1689	0	0	0	0	0	0
1690	0	-0.0153921	0	0	0	-0.00769607
1691	0	-0.0461764	0	0	0	-0.0230882
1692	0	0	0	0	0	0
1693	0	0	0	0	0	0
1694	0	0	0	0	0	0
1695	0	0	0	0	0	0
1696	0	0	0	0	0	0
1697	0	0	0	0	0	0
1698	0	-0.0153921	0	0	0	-0.00769607
1699	0	-0.0153921	0	0	0	-0.00769607
1700	0	-0.0153921	0	0	0	-0.00769607
1701	0	0	0	0	0	0
1702	0	-0.0307843	0	0	0	-0.0153921
1703	0	0	0	-0.0336485	0	-0.0168242
1704	0	0	0	-0.0168242	0	-0.00841212
1705	0	-0.0153921	0	0	0	-0.00769607
1706	0	0	0	0	0	0
1707	0	0	0	-0.0336485	0	-0.0168242
1708	0	-0.0153921	0	0	0	-0.00769607
1709	0	0	0	0	0	0
1710	0	0	0	0	0	0
1711	0	0	0	-0.0168242	0	-0.00841212
1712	0	0	0	0	0	0
1713	0	-0.0153921	0	-0.0168242	0	-0.0161082
1714	0	-0.0153921	0	0	0	-0.00769607
1715	0	0	0	0	0	0
1716	0	0	0	0	0	0
1717	0	0	0	0	0	0
1718	0	-0.0153921	0	0	0	-0.00769607
1719	0	0	0	0	0	0
1720	0	0	0	0	0	0
1721	0	0	0	0	0	0
1722	0	0	0	0	0	0
1723	0	0	0	0	0	0
1724	0	0	0	0	0	0
1725	0	0	0	0	0	0
1726	0	0	0	-0.0168242	0	-0.00841212
1727	0	0	0	0	0	0
1728	0	0	0	0	0	0
1729	0	0	0	0	0	0
1730	0	0	0	0	0	0
1731	0	0	0	0	0	0
1732	0	0	0	0	0	0
1733	0	0	0	0	0	0
1734	0	0	0	0	0	0
1735	0	-0.0153921	0	0	0	-0.00769607
1736	0	0	0	0	0	0
1737	0	-0.0615686	0	-0.0336485	0	-0.0476085
1738	0	-0.0153921	0	0	0	-0.00769607
1739	0	0	0	0	0	0
1740	0	0	0	-0.0336485	0	-0.0168242
1741	0	0	0	0	0	0
1742	0	0	0	0	0	0
1743	0	0	0	0	0	0
1744	0	-0.0153921	0	0	0	-0.00769607
1745	0	0	0	0	0	0
1746	0	0	0	-0.0336485	0	-0.0168242
1747	0	0	0	0	0	0
1748	0	-0.0307843	0	0	0	-0.0153921
1749	0	0	0	0	0	0
1750	0	0	0	0	0	0
1751	0	0	0	0	0	0
1752	0	-0.0153921	0	0	0	-0.00769607
1753	0	0	0	0	0	0
1754	0	0	0	-0.0336485	0	-0.0168242
1755	0	-0.0153921	0	0	0	-0.00769607
1756	0	0	0	-0.0168242	0	-0.00841212
1757	0	0	0	0	0	0
1758	0	-0.0615686	0	-0.0336485	0	-0.0476085
1759	0	0	0	-0.0168242	0	-0.00841212
1760	0	-0.0307843	0	-0.0336485	0	-0.0322164
1761	0	-0.0153921	0	0	0	-0.00769607
1762	0	0	0	0	0	0
1763	0	-0.0153921	0	0	0	-0.00769607
1764	0	0	0	0	0	0
1765	0	0	0	0	0	0
1766	0	0	0	0	0	0
1767	0	0	0	0	0	0
1768	0	-0.0153921	0	0	0	-0.00769607
1769	0	-0.0153921	0	-0.0168242	0	-0.0161082
1770	0	-0.0615686	0	-0.0168242	0	-0.0391964
1771	0	-0.0153921	0	0	0	-0.00769607
1772	0	0	0	0	0	0
1773	0	0	0	-0.0168242	0	-0.00841212
1774	0	-0.0153921	0	0	0	-0.00769607
1775	0	-0.0769607	0	0	0	-0.0384803
1776	0	0	0	-0.0168242	0	-0.00841212
1777	0	0	0	0	0	0
1778	0	0	0	-0.0168242	0	-0.00841212
1779	0	0	0	0	0	0
1780	0	-0.0153921	0	-0.0336485	0	-0.0245203
1781	0	0	0	0	0	0
1782	0	-0.0461764	0	-0.0168242	0	-0.0315003
1783	0	-0.0307843	0	0	0	-0.0153921
1784	0	-0.0307843	0	0	0	-0.0153921
1785	0	0	0	0	0	0
1786	0	0	0	-0.0336485	0	-0.0168242
1787	0	0	0	0	0	0
1788	0	0	0	-0.0168242	0	-0.00841212
1789	0	0	0	0	0	0
1790	0	-0.0153921	0	0	0	-0.00769607
1791	0	0	0	0	0	0
1792	0	-0.0153921	0	0	0	-0.00769607
1793	0	-0.0307843	0	0	0	-0.0153921
1794	0	-0.0615686	0	-0.0168242	0	-0.0391964
1795	0	0	0	0	0	0
1796	0	-0.0153921	0	-0.0168242	0	-0.0161082
1797	0	-0.0307843	0	0	0	-0.0153921
1798	0	0	0	-0.0168242	0	-0.00841212
1799	0	0	0	0	0	0
1800	0	0	0	0	0	0
1801	0	0	0	-0.0168242	0	-0.00841212
1802	0	-0.0153921	0	0	0	-0.00769607
1803	0	0	0	0	0	0
1804	0	0	0	0	0	0
1805	0	-0.0615686	0	-0.0336485	0	-0.0476085
1806	0	0	0	0	0	0
1807	0	-0.0307843	0	0	0	-0.0153921
1808	0	0	0	0	0	0
1809	0	0	0	0	0	0
1810	0	-0.0153921	0	0	0	-0.00769607
1811	0	0	0	0	0	0
1812	0	0	0	0	0	0
1813	0	0	0	0	0	0
1814	0	0	0	-0.0168242	0	-0.00841212
1815	0	0	0	0	0	0
1816	0	0	0	0	0	0
1817	0	0	0	0	0	0
1818	0	0	0	0	0	0
1819	0	0	0	0	0	0
1820	0	-0.0615686	0	0	0	-0.0307843
1821	0	0	0	0	0	0
1822	0	0	0	0	0	0
1823	0	-0.0307843	0	0	0	-0.0153921
1824	0	0	0	0	0	0
1825	0	-0.0153921	0	-0.0168242	0	-0.0161082
1826	0	0	0	0	0	0
1827	0	-0.0153921	0	0	0	-0.00769607
1828	0	-0.0461764	0	-0.0168242	0	-0.0315003
1829	0	0	0	0	0	0
1830	0	0	0	-0.0336485	0	-0.0168242
1831	0	0	0	0	0	0
1832	0	0	0	-0.0168242	0	-0.00841212
1833	0	0	0	0	0	0
1834	0	-0.0153921	0	0	0	-0.00769607
1835	0	0	0	0	0	0
1836	0	-0.0153921	0	-0.0168242	0	-0.0161082
1837	0	0	0	0	0	0
1838	0	0	0	0	0	0
1839	0	0	0	0	0	0
1840	0	0	0	0	0	0
1841	0	0	0	-0.0168242	0	-0.00841212
1842	0	0	0	0	0	0
1843	0	-0.0153921	0	0	0	-0.00769607
1844	0	0	0	0	0	0
1845	0	0	0	0	0	0
1846	0	0	0	0	0	0
1847	0	-0.0153921	0	-0.0168242	0	-0.0161082
1848	0	-0.0307843	0	0	0	-0.0153921
1849	0	0	0	0	0	0
1850	0	0	0	0	0	0
1851	0	0	0	0	0	0
1852	0	-0.0153921	0	0	0	-0.00769607
1853	0	-0.0153921	0	-0.0168242	0	-0.0161082
1854	0	0	0	0	0	0
1855	0	-0.0461764	0	-0.0168242	0	-0.0315003
1856	0	-0.0307843	0	-0.0168242	0	-0.0238043
1857	0	-0.0307843	0	-0.0504727	0	-0.0406285
1858	0	0	0	0	0	0
1859	0	0	0	0	0	0
1860	0	0	0	0	0	0
1861	0	-0.0153921	0	0	0	-0.00769607
1862	0	0	0	0	0	0
1863	0	0	0	0	0	0
1864	0	0	0	0	0	0
1865	0	0	0	-0.0168242	0	-0.00841212
1866	0	0	0	0	0	0
1867	0	0	0	0	0	0
1868	0	-0.0307843	0	0	0	-0.0153921
1869	0	-0.0307843	0	-0.0504727	0	-0.0406285
1870	0	-0.0153921	0	0	0	-0.00769607
1871	0	0	0	0	0	0
1872	0	-0.0615686	0	-0.0168242	0	-0.0391964
1873	0	0	0	0	0	0
1874	0	0	0	0	0	0
1875	0	-0.0307843	0	0	0	-0.0153921
1876	0	0	0	0	0	0
1877	0	0	0	0	0	0
1878	0	-0.0153921	0	0	0	-0.00769607
1879	0	0	0	0	0	0
1880	0	0	0	0	0	0
1881	0	0	0	0	0	0
1882	0	0	0	0	0	0
1883	0	-0.0153921	0	0	0	-0.00769607
1884	0	0	0	0	0	0
1885	0	0	0	0	0	0
1886	0	0	0	0	0	0
1887	0	0	0	0	0	0
1888	0	0	0	0	0	0
1889	0	-0.0153921	0.0336485	-0.0336485	0.0168242	-0.0245203
1890	0	-0.0153921	0	0	0	-0.00769607
1891	0	0	0	-0.0168242	0	-0.00841212
1892	0	0	0	0	0	0
1893	0	0	0	-0.0336485	0	-0.0168242
1894	0	0	0	0	0	0
1895	0	0	0	-0.0336485	0	-0.0168242
1896	0	0	0	0	0	0
1897	0	0	0	0	0	0
1898	0	-0.0307843	0	-0.0168242	0	-0.0238043
1899	0	0	0	-0.0336485	0	-0.0168242
1900	0	0	0	0	0	0
1901	0	0	0	0	0	0
1902	0	-0.0153921	0	0	0	-0.00769607
1903	0	0	0	-0.0168242	0	-0.00841212
1904	0	-0.0153921	0	0	0	-0.00769607
1905	0	-0.0153921	0	0	0	-0.00769607
1906	0	0	0	0	0	0
1907	0	0	0	0	0	0
1908	0	-0.0153921	0	0	0	-0.00769607
1909	0	0	0	0	0	0
1910	0	0	0	-0.0168242	0	-0.00841212
1911	0	-0.0307843	0	0	0	-0.0153921
1912	0	0	0	0	0	0
1913	0	-0.0153921	0	0	0	-0.00769607
1914	0	0	0	0	0	0
1915	0	0	0	0	0	0
1916	0	0	0	0	0	0
1917	0	0	0	0	0	0
1918	0	0	0	0	0	0
1919	0	-0.0307843	0	0	0	-0.0153921
1920	0	-0.0307843	0	-0.0168242	0	-0.0238043
1921	0	-0.0307843	0	0	0	-0.0153921
1922	0	0	0	0	0	0
1923	0	0	0	0	0	0
1924	0	0	0	0	0	0
1925	0	0	0	0	0	0
1926	0	0	0	0	0	0
1927	0	0	0	0	0	0
1928	0	0	0	0	0	0
1929	0	0	0	-0.0168242	0	-0.00841212
1930	0	0	0	0	0	0
1931	0	-0.0307843	0	-0.0168242	0	-0.0238043
1932	0	-0.0153921	0	0	0	-0.00769607
1933	0	0	0	0	0	0
1934	0	0	0	0	0	0
1935	0	0	0	-0.0336485	0	-0.0168242
1936	0	0	0	0	0	0
1937	0	-0.0307843	0	-0.0168242	0	-0.0238043
1938	0	0	0	0	0	0
1939	0.0153921	-0.0153921	0	0	0.00769607	-0.00769607
1940	0	0	0	0	0	0
1941	0	-0.0153921	0	0	0	-0.00769607
1942	0	0	0	0	0	0
1943	0	-0.0153921	0	0	0	-0.00769607
1944	0	-0.107745	0	-0.134594	0	-0.121169
1945	0	0	0	-0.0168242	0	-0.00841212
1946	0	-0.0461764	0	-0.0168242	0	-0.0315003
1947	0	0	0	0	0	0
1948	0	-0.0153921	0	-0.0504727	0	-0.0329324
1949	0	0	0	-0.0168242	0	-0.00841212
1950	0	0	0	0	0	0
1951	0	0	0	0	0	0
1952	0	0	0	0	0	0
1953	0	0	0	0	0	0
1954	0	0	0	0	0	0
1955	0	0	0	0	0	0
1956	0	0	0	0	0	0
1957	0	0	0	0	0	0
1958	0	0	0	0	0	0
1959	0	0	0	0	0	0
1960	0	-0.0153921	0	0	0	-0.00769607
1961	0	0	0	0	0	0
1962	0	-0.0153921	0	0	0	-0.00769607
1963	0	0	0	0	0	0
1964	0	0	0	0	0	0
1965	0	0	0	0	0	0
1966	0	0	0	-0.0168242	0	-0.00841212
1967	0	0	0	0	0	0
1968	0	0	0	0	0	0
1969	0	0	0	0	0	0
1970	0	0	0	0	0	0
1971	0	0	0	0	0	0
1972	0	0	0	0	0	0
1973	0	0	0	0	0	0
1974	0	0	0	0	0	0
1975	0.0153921	0	0	0	0.00769607	0
1976	0	-0.0153921	0.0336485	0	0.0168242	-0.00769607
1977	0	0	0	-0.0336485	0	-0.0168242
1978	0	-0.0153921	0	0	0	-0.00769607
1979	0	0	0	0	0	0
1980	0	0	0	0	0	0
1981	0	0	0	0	0	0
1982	0	-0.0461764	0	0	0	-0.0230882
1983	0	0	0	0	0	0
1984	0	0	0	0	0	0
1985	0	0	0	0	0	0
1986	0	0	0	0	0	0
1987	0	0	0	0	0	0
1988	0	-0.0461764	0	0	0	-0.0230882
1989	0	-0.0153921	0	0	0	-0.00769607
1990	0	-0.0153921	0	0	0	-0.00769607
1991	0	0	0	0	0	0
1992	0	0	0	0	0	0
1993	0	0	0	0	0	0
1994	0	0	0	0	0	0
1995	0	-0.0153921	0	0	0	-0.00769607
1996	0	0	0	-0.0168242	0	-0.00841212
1997	0	0	0	0	0	0
1998	0	0	0	0	0	0
1999	0	0	0	-0.0168242	0	-0.00841212
[truncated: 782 more rows]

## Sheet: R-IL 30dpi (IL)
position	fwd 1	rev 1	fwd 2	rev 2	rightward	leftward
1	0	0	0	0	0	0
2	0	0	0	0	0	0
3	0	0	0	0	0	0
4	0	0	0	0	0	0
5	0	0	0	0	0	0
6	0	0	0	0	0	0
7	0	0	0	0	0	0
8	0	0	0	0	0	0
9	0	0	0	0	0	0
10	0	0	0	0	0	0
11	0	0	0	0	0	0
12	0	0	0	0	0	0
13	0	0	0	0	0	0
14	0	0	0	0	0	0
15	0	0	0	0	0	0
16	0	0	0	0	0	0
17	0	0	0	0	0	0
18	0	0	0	0	0	0
19	0	0	0	0	0	0
20	0	0	0	0	0	0
21	0	0	0	0	0	0
22	0	0	0	0	0	0
23	0	0	0	0	0	0
24	0	0	0	0	0	0
25	0	0	0	0	0	0
26	0	0	0	0	0	0
27	0	0	0	0	0	0
28	0	0	0	0	0	0
29	0	0	0	0	0	0
30	0	0	0	0	0	0
31	0	0	0	0	0	0
32	0	0	0	0	0	0
33	0	0	0	0	0	0
34	0	0	0	0	0	0
35	0	0	0	0	0	0
36	0	0	0	0	0	0
37	0	0	0	0	0	0
38	0	0	0	0	0	0
39	0	0	0	0	0	0
40	0	0	0	0	0	0
41	0	0	0	0	0	0
42	0	0	0	0	0	0
43	0	0	0	0	0	0
44	0	0	0	0	0	0
45	0	0	0	0	0	0
46	0	0	0	0	0	0
47	0	0	0	0	0	0
48	0	0	0	0	0	0
49	0	0	0	0	0	0
50	0	0	0	0	0	0
51	0	0	0	0	0	0
52	0	0	0	0	0	0
53	0	0	0	0	0	0
54	0	0	0	0	0	0
55	0	0	0	0	0	0
56	0	0	0	0	0	0
57	0	0	0	0	0	0
58	0	0	0	0	0	0
59	0	0	0	0	0	0
60	0	0	0	0	0	0
61	0	0	0	0	0	0
62	0	0	0	0	0	0
63	0	0	0	0	0	0
64	0	0	0	0	0	0
65	0	0	0	0	0	0
66	0	0	0	0	0	0
67	0	0	0	0	0	0
68	0	0	0	0	0	0
69	0	0	0	0	0	0
70	0	0	0	0	0	0
71	0	0	0	0	0	0
72	0	0	0	0	0	0
73	0	0	0	0	0	0
74	0	0	0	0	0	0
75	0	0	0	0	0	0
76	0	0	0	0	0	0
77	0	0	0	0	0	0
78	0	0	0	0	0	0
79	0	0	0	0	0	0
80	0	0	0	0	0	0
81	0	0	0	0	0	0
82	0.0155247	0	0	0	0.00776236	0
83	0	0	0	0	0	0
84	0	0	0	0	0	0
85	0	0	0	0	0	0
86	0	0	0	0	0	0
87	0	0	0	0	0	0
88	0	0	0	0	0	0
89	0	0	0	0	0	0
90	0	0	0	0	0	0
91	0	0	0	0	0	0
92	0	0	0	0	0	0
93	0	0	0	0	0	0
94	0	0	0	0	0	0
95	0	0	0	0	0	0
96	0	0	0	0	0	0
97	0	0	0	0	0	0
98	0	0	0	0	0	0
99	0	0	0	0	0	0
100	0	0	0	0	0	0
101	0	0	0	0	0	0
102	0	0	0	0	0	0
103	0	0	0	0	0	0
104	0	0	0	0	0	0
105	0	0	0	0	0	0
106	0	0	0	0	0	0
107	0	0	0	0	0	0
108	0	0	0	0	0	0
109	0	0	0	0	0	0
110	0	0	0	0	0	0
111	0	0	0	0	0	0
112	0	0	0	0	0	0
113	0	0	0	0	0	0
114	0	0	0	0	0	0
115	0	0	0	0	0	0
116	0	0	0	0	0	0
117	0	0	0	0	0	0
118	0	0	0	0	0	0
119	0	0	0	0	0	0
120	0	0	0	0	0	0
121	0	0	0	0	0	0
122	0	0	0	0	0	0
123	0	0	0	0	0	0
124	0	0	0	0	0	0
125	0	0	0	0	0	0
126	0	0	0	0	0	0
127	0	0	0	0	0	0
128	0	0	0	0	0	0
129	0	0	0	0	0	0
130	0	0	0	0	0	0
131	0	0	0	0	0	0
132	0	0	0	0	0	0
133	0	0	0.0190619	0	0.00953097	0
134	0	0	0	0	0	0
135	0	0	0.0190619	0	0.00953097	0
136	0	0	0	0	0	0
137	0	0	0	0	0	0
138	0	0	0	0	0	0
139	0	0	0	0	0	0
140	0	0	0	0	0	0
141	0.0155247	0	0	0	0.00776236	0
142	0	0	0	0	0	0
143	0	0	0	0	0	0
144	0	0	0	0	0	0
145	0	0	0	0	0	0
146	0	0	0	0	0	0
147	0	0	0.0190619	0	0.00953097	0
148	0	0	0	0	0	0
149	0	0	0	0	0	0
150	0	0	0	0	0	0
151	0	0	0.0190619	0	0.00953097	0
152	0.0465742	0	0	0	0.0232871	0
153	0	0	0.0381239	0	0.0190619	0
154	0.0310495	0	0	0	0.0155247	0
155	0	0	0.0190619	0	0.00953097	0
156	0.155247	0	0.228743	0	0.191995	0
157	0.0310495	0	0.114372	0	0.0727105	0
158	0.139723	0	0.114372	0	0.127047	0
159	0.0155247	0	0.0762477	0	0.0458862	0
160	0.232871	0	0.209681	0	0.221276	0
161	0.170772	0	0.133434	0	0.152103	0
162	0.248396	0	0.362177	0	0.305286	0
163	0.0776236	0	0.133434	0	0.105529	0
164	0.0155247	0	0	0	0.00776236	0
165	0.0155247	0	0.0190619	0	0.0172933	0
166	0.0310495	0	0	0	0.0155247	0
167	0.0465742	0	0	0	0.0232871	0
168	0.0931484	0	0.0381239	0	0.0656361	0
169	0.0465742	0	0.114372	0	0.0804729	0
170	0.0155247	0	0	0	0.00776236	0
171	0	0	0	0	0	0
172	0	0	0	0	0	0
173	0.0931484	0	0.0381239	0	0.0656361	0
174	0.0620989	0	0.0571858	0	0.0596424	0
175	0.0620989	0	0.114372	0	0.0882353	0
176	0.0310495	0	0.0571858	0	0.0441176	0
177	0.0931484	0	0.152495	0	0.122822	0
178	0.139723	0	0.114372	0	0.127047	0
179	0.0310495	0	0.0190619	0	0.0250557	0
180	0	0	0	0	0	0
181	0	0	0	0	0	0
182	0	0	0.0190619	0	0.00953097	0
183	0.0155247	0	0.0190619	0	0.0172933	0
184	0.0620989	0	0.0190619	0	0.0405804	0
185	0.0310495	0	0.0190619	0	0.0250557	0
186	0	0	0.0190619	0	0.00953097	0
187	0.155247	0	0.0381239	0	0.0966856	0
188	0	0	0	0	0	0
189	0.0310495	0	0.0571858	0	0.0441176	0
190	0.0465742	0	0.0953097	0	0.0709419	0
191	0	0	0	0	0	0
192	0.0620989	0	0.0762477	0	0.0691733	0
193	0	0	0	0	0	0
194	0	0	0.0190619	0	0.00953097	0
195	0	0	0	0	0	0
196	0	0	0.0190619	0	0.00953097	0
197	0.108673	0	0.0571858	0	0.0829295	0
198	0.0465742	0	0.0381239	0	0.042349	0
199	0.0465742	0	0.0190619	0	0.0328181	0
200	0.0776236	0	0.114372	0	0.0959976	0
201	0.0310495	0	0.0190619	0	0.0250557	0
202	0	0	0	0	0	0
203	0.0155247	0	0.0381239	0	0.0268243	0
204	0.0776236	0	0.133434	0	0.105529	0
205	0.0155247	0	0	0	0.00776236	0
206	0.0465742	0	0.0190619	0	0.0328181	0
207	0.0155247	0	0.0381239	0	0.0268243	0
208	0.0155247	0	0	0	0.00776236	0
209	0.0465742	0	0	0	0.0232871	0
210	0.0155247	0	0	0	0.00776236	0
211	0	0	0	0	0	0
212	0	0	0	0	0	0
213	0.0310495	0	0.0190619	0	0.0250557	0
214	0.0155247	0	0.0190619	0	0.0172933	0
215	0	0	0.0190619	0	0.00953097	0
216	0.0155247	0	0	0	0.00776236	0
217	0.108673	0	0.0571858	0	0.0829295	0
218	0.0465742	0	0.0762477	0	0.061411	0
219	0	0	0.0762477	0	0.0381239	0
220	0.0310495	0	0	0	0.0155247	0
221	0.139723	0	0.343115	0	0.241419	0
222	0.0931484	0	0.0953097	0	0.094229	0
223	0	0	0.0381239	0	0.0190619	0
224	0.0776236	0	0.285929	0	0.181776	0
225	0.0465742	0	0.0190619	0	0.0328181	0
226	0.0776236	0	0.0571858	0	0.0674047	0
227	0.0465742	0	0.0381239	0	0.042349	0
228	0.0620989	0	0.0190619	0	0.0405804	0
229	0.0931484	0	0.133434	0	0.113291	0
230	0	0	0	0	0	0
231	0	0	0	0	0	0
232	0.0465742	0	0	0	0.0232871	0
233	0.0776236	0	0.0571858	0	0.0674047	0
234	0.108673	0	0.114372	0	0.111522	0
235	0.0310495	0	0.0381239	0	0.0345867	0
236	0	0	0	0	0	0
237	0.0155247	0	0	0	0.00776236	0
238	0	0	0.0190619	0	0.00953097	0
239	0.0620989	0	0.0190619	0	0.0405804	0
240	0.0310495	0	0.0381239	0	0.0345867	0
241	0.139723	0	0.133434	0	0.136578	0
242	0.0620989	0	0.0190619	0	0.0405804	0
243	0.139723	0	0.171557	0	0.15564	0
244	0.0155247	0	0.0762477	0	0.0458862	0
245	0	0	0.0381239	0	0.0190619	0
246	0.0931484	0	0.0571858	0	0.0751671	0
247	0.0310495	0	0	0	0.0155247	0
248	0.0465742	0	0.0381239	0	0.042349	0
249	0.0155247	0	0	0	0.00776236	0
250	0.279445	0	0.114372	0	0.196908	0
251	0.0776236	0	0.0953097	0	0.0864667	0
252	0	0	0	0	0	0
253	0.0155247	0	0	0	0.00776236	0
254	0.170772	0	0.209681	0	0.190227	0
255	0.108673	0	0.190619	0	0.149646	0
256	0	0	0	0	0	0
257	0.186297	0	0.0762477	0	0.131272	0
258	0.0620989	0	0	0	0.0310495	0
259	0.0931484	0	0	0	0.0465742	0
260	0.0155247	0	0.0381239	0	0.0268243	0
261	0	0	0	0	0	0
262	0.0776236	0	0	0	0.0388118	0
263	0.0310495	0	0.0381239	0	0.0345867	0
264	0.108673	0	0.0190619	0	0.0638675	0
265	0.0620989	0	0.0762477	0	0.0691733	0
266	0.434692	0	0.285929	0	0.360311	0
267	0.0620989	0	0.0190619	0	0.0405804	0
268	0.0620989	0	0	0	0.0310495	0
269	0	0	0.0571858	0	0.0285929	0
270	0.0620989	0	0.0190619	0	0.0405804	0
271	0	0	0	0	0	0
272	0	0	0	0	0	0
273	0.0155247	0	0.0381239	0	0.0268243	0
274	0.0310495	0	0	0	0.0155247	0
275	0.0310495	0	0.0190619	0	0.0250557	0
276	0.0155247	0	0.0190619	0	0.0172933	0
277	0.0155247	0	0	0	0.00776236	0
278	0	0	0.0190619	0	0.00953097	0
279	0	0	0	0	0	0
280	0.217346	0	0.266867	0	0.242107	0
281	0	0	0.0381239	0	0.0190619	0
282	0.0776236	0	0.0762477	0	0.0769357	0
283	0.0310495	0	0.0190619	0	0.0250557	0
284	0.139723	0	0.285929	0	0.212826	0
285	0.667563	0	0.68623	0	0.676896	0
286	0	0	0.0190619	0	0.00953097	0
287	0.0310495	0	0.0190619	0	0.0250557	0
288	0	0	0	0	0	0
289	0.124198	0	0.0953097	0	0.109754	0
290	0	0	0.0381239	0	0.0190619	0
291	0.0310495	0	0.0381239	0	0.0345867	0
292	0.0465742	0	0	0	0.0232871	0
293	0.0310495	0	0	0	0.0155247	0
294	0.0155247	0	0.152495	0	0.0840101	0
295	0	0	0	0	0	0
296	0.248396	0	0.0953097	0	0.171853	0
297	0	0	0.0381239	0	0.0190619	0
298	0.0310495	0	0.0381239	0	0.0345867	0
299	0.139723	0	0.152495	0	0.146109	0
300	0.0310495	0	0.114372	0	0.0727105	0
301	0.108673	0	0.0953097	0	0.101991	0
302	0.0931484	0	0.0190619	0	0.0561052	0
303	0.0465742	0	0.0381239	0	0.042349	0
304	0.0776236	0	0.0381239	0	0.0578738	0
305	0.0310495	0	0	0	0.0155247	0
306	0.0931484	0	0.0571858	0	0.0751671	0
307	0	0	0.0190619	0	0.00953097	0
308	0	0	0.0381239	0	0.0190619	0
309	0	0	0.0190619	0	0.00953097	0
310	0.326019	0	0.247805	0	0.286912	0
311	0	0	0.0381239	0	0.0190619	0
312	0.0155247	0	0.0571858	0	0.0363553	0
313	0.0776236	0	0.0571858	0	0.0674047	0
314	0.0310495	0	0.0381239	0	0.0345867	0
315	0.0620989	0	0.0190619	0	0.0405804	0
316	0	0	0	0	0	0
317	0.170772	0	0.114372	0	0.142572	0
318	0.0310495	0	0.0571858	0	0.0441176	0
319	0.0465742	0	0	0	0.0232871	0
320	0.26392	0	0.247805	0	0.255863	0
321	0.108673	0	0.0762477	0	0.0924604	0
322	0.434692	0	0.190619	0	0.312656	0
323	0.139723	0	0.0762477	0	0.107985	0
324	0.201821	0	0.0571858	0	0.129504	0
325	0.0465742	0	0.0762477	0	0.061411	0
326	0.0155247	0	0.0190619	0	0.0172933	0
327	0.0310495	0	0	0	0.0155247	0
328	0.0310495	0	0	0	0.0155247	0
329	0.0310495	0	0.0571858	0	0.0441176	0
330	0.0155247	0	0.0190619	0	0.0172933	0
331	0.217346	0	0.114372	0	0.165859	0
332	0.605464	0	0.457486	0	0.531475	0
333	0.139723	0	0.152495	0	0.146109	0
334	0.0776236	0	0.0381239	0	0.0578738	0
335	0.636514	0	0.381239	0	0.508876	0
336	0.0310495	0	0	0	0.0155247	0
337	0.0310495	0	0	0	0.0155247	0
338	0	0	0	0	0	0
339	0	0	0	0	0	0
340	0	0	0	0	0	0
341	0	0	0	0	0	0
342	0.0465742	0	0.0381239	0	0.042349	0
343	0.155247	0	0.0190619	0	0.0871546	0
344	0.0155247	0	0.0190619	0	0.0172933	0
345	0.186297	0	0.114372	0	0.150334	0
346	0.0310495	0	0	0	0.0155247	0
347	0.0155247	0	0.0190619	0	0.0172933	0
348	0.0155247	0	0	0	0.00776236	0
349	0.0310495	0	0.0762477	0	0.0536486	0
350	0.0620989	0	0.0762477	0	0.0691733	0
351	0.139723	0	0.0762477	0	0.107985	0
352	0.155247	0	0.0190619	0	0.0871546	0
353	0.139723	0	0.0571858	0	0.0984542	0
354	0.108673	0	0.0381239	0	0.0733985	0
355	0.0776236	0	0.0190619	0	0.0483428	0
356	0.29497	0	0.266867	0	0.280918	0
357	0	0	0	0	0	0
358	0	0	0.0381239	0	0.0190619	0
359	0.0465742	0	0.0381239	0	0.042349	0
360	0.0155247	0	0.0571858	0	0.0363553	0
361	0.0465742	0	0.0762477	0	0.061411	0
362	0.170772	0	0.114372	0	0.142572	0
363	0.0155247	0	0	0	0.00776236	0
364	0	0	0	0	0	0
365	0.0465742	0	0.0571858	0	0.05188	0
366	0.0776236	0	0.0762477	0	0.0769357	0
367	0.248396	0	0.0762477	0	0.162322	0
368	0.155247	0	0.0953097	0	0.125278	0
369	0.108673	0	0.0762477	0	0.0924604	0
370	0.527841	0	0.285929	0	0.406885	0
371	0.0620989	0	0.0762477	0	0.0691733	0
372	0.26392	0	0.114372	0	0.189146	0
373	0.279445	0	0.190619	0	0.235032	0
374	0	0	0	0	0	0
375	0.0155247	0	0.0190619	0	0.0172933	0
376	0	0	0.0190619	0	0.00953097	0
377	0	0	0.0190619	0	0.00953097	0
378	0	0	0	0	0	0
379	0.170772	0	0.0381239	0	0.104448	0
380	0.0465742	0	0.0381239	0	0.042349	0
381	0.232871	0	0.0953097	0	0.16409	0
382	0.108673	0	0.0953097	0	0.101991	0
383	0.0310495	0	0.0190619	0	0.0250557	0
384	0.0620989	0	0.0953097	0	0.0787043	0
385	0.0155247	0	0.0190619	0	0.0172933	0
386	0.0155247	0	0	0	0.00776236	0
387	0.0931484	0	0.0571858	0	0.0751671	0
388	0.0776236	0	0.152495	0	0.11506	0
389	0.0465742	0	0.133434	0	0.0900039	0
390	0.0310495	0	0.0190619	0	0.0250557	0
391	0.0155247	0	0.0381239	0	0.0268243	0
392	0.0155247	0	0	0	0.00776236	0
393	0.139723	0	0.209681	0	0.174702	0
394	0.0620989	0	0.0381239	0	0.0501114	0
395	0.326019	0	0.114372	0	0.220195	0
396	0.0155247	0	0	0	0.00776236	0
397	0.0465742	0	0.0190619	0	0.0328181	0
398	0.0155247	0	0	0	0.00776236	0
399	0.0310495	0	0	0	0.0155247	0
400	0.0310495	0	0.0381239	0	0.0345867	0
401	0.155247	0	0.0381239	0	0.0966856	0
402	0.0155247	0	0.0381239	0	0.0268243	0
403	0.0310495	0	0.0190619	0	0.0250557	0
404	0.0620989	0	0.0381239	0	0.0501114	0
405	0.0155247	0	0.0571858	0	0.0363553	0
406	0.139723	0	0.0762477	0	0.107985	0
407	0.279445	0	0.247805	0	0.263625	0
408	0.0776236	0	0.0381239	0	0.0578738	0
409	0.108673	0	0.0762477	0	0.0924604	0
410	0.0465742	0	0.0571858	0	0.05188	0
411	0.0155247	0	0.0953097	0	0.0554172	0
412	0.0155247	0	0.0190619	0	0.0172933	0
413	0.0310495	0	0.171557	0	0.101303	0
414	0.0155247	0	0	0	0.00776236	0
415	0.0310495	0	0.133434	0	0.0822415	0
416	0.0155247	0	0	0	0.00776236	0
417	0.0155247	0	0.114372	0	0.0649482	0
418	0.0465742	0	0	0	0.0232871	0
419	0.155247	0	0.190619	0	0.172933	0
420	0.201821	0	0.247805	0	0.224813	0
421	0.217346	0	0.304991	0	0.261169	0
422	0.26392	0	0.209681	0	0.236801	0
423	0.155247	0	0.171557	0	0.163402	0
424	0.124198	0	0.0953097	0	0.109754	0
425	0.0620989	0	0	0	0.0310495	0
426	0.0155247	0	0	0	0.00776236	0
427	0.0776236	0	0.0190619	0	0.0483428	0
428	0	0	0.0953097	0	0.0476548	0
429	0.0465742	0	0.0953097	0	0.0709419	0
430	0.0465742	0	0.0762477	0	0.061411	0
431	0.0620989	0	0.0381239	0	0.0501114	0
432	0.0310495	0	0	0	0.0155247	0
433	0.0620989	0	0	0	0.0310495	0
434	0.0931484	0	0.343115	0	0.218132	0
435	0.0776236	0	0	0	0.0388118	0
436	0.170772	0	0.190619	0	0.180696	0
437	0.0155247	0	0.0571858	0	0.0363553	0
438	0.139723	0	0.266867	0	0.203295	0
439	0.0155247	0	0	0	0.00776236	0
440	0.124198	0	0.324053	0	0.224125	0
441	0.0931484	0	0.228743	0	0.160946	0
442	0.232871	0	0.114372	0	0.173621	0
443	0.0155247	0	0.0762477	0	0.0458862	0
444	0.0155247	0	0.0762477	0	0.0458862	0
445	0.201821	0	0.114372	0	0.158097	0
446	0.170772	0	0.0953097	0	0.133041	0
447	0.0310495	0	0.0381239	0	0.0345867	0
448	0.0155247	0	0.0190619	0	0.0172933	0
449	0.0465742	0	0.190619	0	0.118597	0
450	0.26392	0	0.266867	0	0.265394	0
451	0.0310495	0	0.133434	0	0.0822415	0
452	0.29497	0	0.266867	0	0.280918	0
453	0.0155247	0	0	0	0.00776236	0
454	0.108673	0	0.0571858	0	0.0829295	0
455	0.0310495	0	0.0190619	0	0.0250557	0
456	0.108673	0	0.190619	0	0.149646	0
457	0.170772	0	0.133434	0	0.152103	0
458	0	0	0	0	0	0
459	0.0465742	0	0.0953097	0	0.0709419	0
460	0.124198	0	0.133434	0	0.128816	0
461	0.155247	0	0.228743	0	0.191995	0
462	0.0310495	0	0.0762477	0	0.0536486	0
463	0.0310495	0	0.0571858	0	0.0441176	0
464	0.419168	0	0.514672	0	0.46692	0
465	0.0155247	0	0	0	0.00776236	0
466	0.388118	0	0.247805	0	0.317962	0
467	0	0	0.0381239	0	0.0190619	0
468	0.279445	0	0.133434	0	0.206439	0
469	0.186297	0	0.0571858	0	0.121741	0
470	0.108673	0	0.0953097	0	0.101991	0
471	0.124198	0	0.152495	0	0.138347	0
472	0.0776236	0	0	0	0.0388118	0
473	0	0	0.0381239	0	0.0190619	0
474	0.0310495	0	0.0381239	0	0.0345867	0
475	0	0	0.0190619	0	0.00953097	0
476	0.0310495	0	0.0190619	0	0.0250557	0
477	0.170772	0	0.171557	0	0.171165	0
478	0.0465742	0	0.0381239	0	0.042349	0
479	0.0931484	0	0.209681	0	0.151415	0
480	0.0310495	0	0.0571858	0	0.0441176	0
481	0.0620989	0	0.0762477	0	0.0691733	0
482	0.0155247	0	0.0571858	0	0.0363553	0
483	0.0620989	0	0.0762477	0	0.0691733	0
484	0.0465742	0	0.0190619	0	0.0328181	0
485	0.0155247	0	0.0953097	0	0.0554172	0
486	0.0465742	0	0.0762477	0	0.061411	0
487	0.0310495	0	0.114372	0	0.0727105	0
488	0.0620989	0	0.247805	0	0.154952	0
489	0.0776236	0	0.133434	0	0.105529	0
490	0.0465742	0	0.152495	0	0.0995348	0
491	0.108673	0	0.0762477	0	0.0924604	0
492	0.0155247	0	0	0	0.00776236	0
493	0.155247	0	0.0571858	0	0.106217	0
494	0.0465742	0	0.0762477	0	0.061411	0
495	0.0155247	0	0	0	0.00776236	0
496	0.0620989	0	0.0762477	0	0.0691733	0
497	0.0310495	0	0.0190619	0	0.0250557	0
498	0.0310495	0	0.0762477	0	0.0536486	0
499	0.108673	0	0.0571858	0	0.0829295	0
500	0.186297	0	0.247805	0	0.217051	0
501	0.0620989	0	0.171557	0	0.116828	0
502	0.0776236	0	0.152495	0	0.11506	0
503	0.108673	0	0.228743	0	0.168708	0
504	0.434692	0	0.552796	0	0.493744	0
505	0.0620989	0	0.0571858	0	0.0596424	0
506	0.0465742	0	0.190619	0	0.118597	0
507	0.170772	0	0.0953097	0	0.133041	0
508	0.0620989	0	0	0	0.0310495	0
509	0.0310495	0	0.0381239	0	0.0345867	0
510	0.0310495	0	0.0762477	0	0.0536486	0
511	0.0776236	0	0	0	0.0388118	0
512	0.0776236	0	0.0381239	0	0.0578738	0
513	0.0776236	0	0.114372	0	0.0959976	0
514	0.0155247	0	0.0571858	0	0.0363553	0
515	0.0310495	0	0.133434	0	0.0822415	0
516	0	0	0	0	0	0
517	0.0155247	0	0.0381239	0	0.0268243	0
518	0.139723	0	0.209681	0	0.174702	0
519	0.0465742	0	0.0571858	0	0.05188	0
520	0.0620989	0	0.304991	0	0.183545	0
521	0.0155247	0	0.0190619	0	0.0172933	0
522	0	0	0.0381239	0	0.0190619	0
523	0.0931484	0	0	0	0.0465742	0
524	0.0776236	0	0.0571858	0	0.0674047	0
525	0.279445	0	0.114372	0	0.196908	0
526	0.0155247	0	0	0	0.00776236	0
527	0.0620989	0	0.0571858	0	0.0596424	0
528	0.0155247	0	0	0	0.00776236	0
529	0.0620989	0	0	0	0.0310495	0
530	0.155247	0	0.209681	0	0.182464	0
531	0	0	0	0	0	0
532	0.0155247	0	0.0571858	0	0.0363553	0
533	0	0	0.0762477	0	0.0381239	0
534	0.186297	0	0.228743	0	0.20752	0
535	0.155247	0	0	0	0.0776236	0
536	0.0155247	0	0.0190619	0	0.0172933	0
537	0.0776236	0	0.0190619	0	0.0483428	0
538	0.0155247	0	0.0571858	0	0.0363553	0
539	0.155247	0	0.0571858	0	0.106217	0
540	0.0465742	0	0.0381239	0	0.042349	0
541	0.0620989	0	0.0953097	0	0.0787043	0
542	0.170772	0	0.362177	0	0.266474	0
543	0.139723	0	0.0190619	0	0.0793922	0
544	0.0776236	0	0.190619	0	0.134122	0
545	0.0465742	0	0.0381239	0	0.042349	0
546	0.0465742	0	0.0953097	0	0.0709419	0
547	0.0776236	0	0.0381239	0	0.0578738	0
548	0.248396	0	0.228743	0	0.238569	0
549	0.0620989	0	0.114372	0	0.0882353	0
550	0.217346	0	0.381239	0	0.299292	0
551	0.0931484	0	0.0762477	0	0.0846981	0
552	0.26392	0	0.209681	0	0.236801	0
553	0.0776236	0	0.0381239	0	0.0578738	0
554	0.0465742	0	0	0	0.0232871	0
555	0	0	0	0	0	0
556	0.0155247	0	0.114372	0	0.0649482	0
557	0.155247	0	0.304991	0	0.230119	0
558	0	0	0.0190619	0	0.00953097	0
559	0.0620989	0	0.0571858	0	0.0596424	0
560	0.0310495	0	0.152495	0	0.0917725	0
561	0.0465742	0	0.0571858	0	0.05188	0
562	0	0	0.0190619	0	0.00953097	0
563	0.0155247	0	0.114372	0	0.0649482	0
564	0	0	0	0	0	0
565	0	0	0.0190619	0	0.00953097	0
566	0	0	0	0	0	0
567	0.0465742	0	0.0381239	0	0.042349	0
568	0.0310495	0	0.0381239	0	0.0345867	0
569	0.0465742	0	0.0762477	0	0.061411	0
570	0.0620989	0	0.0381239	0	0.0501114	0
571	0.0155247	0	0.0190619	0	0.0172933	0
572	0	0	0	0	0	0
573	0.0310495	0	0.0953097	0	0.0631796	0
574	0.481267	0	0.552796	0	0.517031	0
575	0.58994	0	0.49561	0	0.542775	0
576	0.29497	0	0.0762477	0	0.185609	0
577	0.0310495	0	0.0571858	0	0.0441176	0
578	0.139723	0	0.171557	0	0.15564	0
579	0.0776236	0	0.190619	0	0.134122	0
580	0.0465742	0	0.0571858	0	0.05188	0
581	0.0310495	0	0.114372	0	0.0727105	0
582	0.0310495	0	0.0953097	0	0.0631796	0
583	0.0465742	0	0	0	0.0232871	0
584	0.0155247	0	0	0	0.00776236	0
585	0	0	0.0190619	0	0.00953097	0
586	0.0776236	0	0.0381239	0	0.0578738	0
587	0.0776236	0	0.0953097	0	0.0864667	0
588	0.0931484	0	0.0762477	0	0.0846981	0
589	0.0776236	0	0.0762477	0	0.0769357	0
590	0.0931484	0	0.0381239	0	0.0656361	0
591	0	0	0.0571858	0	0.0285929	0
592	0.29497	0	0.457486	0	0.376228	0
593	0.124198	0	0.247805	0	0.186001	0
594	0	0	0.0190619	0	0.00953097	0
595	0.155247	0	0.304991	0	0.230119	0
596	0.29497	0	0.514672	0	0.404821	0
597	0.108673	0	0.152495	0	0.130584	0
598	0.0931484	0	0.0381239	0	0.0656361	0
599	0.139723	0	0.247805	0	0.193764	0
600	0.0310495	0	0.0571858	0	0.0441176	0
601	0	0	0.0571858	0	0.0285929	0
602	0.0310495	0	0	0	0.0155247	0
603	0	0	0.0381239	0	0.0190619	0
604	0.0465742	0	0.152495	0	0.0995348	0
605	0.0310495	0	0.114372	0	0.0727105	0
606	0.372593	0	0.324053	0	0.348323	0
607	0.0931484	0	0.0190619	0	0.0561052	0
608	0.279445	0	0.266867	0	0.273156	0
609	0.201821	0	0.190619	0	0.19622	0
610	0.108673	0	0.152495	0	0.130584	0
611	0.124198	0	0.285929	0	0.205063	0
612	0.0620989	0	0.152495	0	0.107297	0
613	0.217346	0	0.266867	0	0.242107	0
614	0.279445	0	0.324053	0	0.301749	0
615	0.170772	0	0.266867	0	0.21882	0
616	0.0776236	0	0.0953097	0	0.0864667	0
617	0.0465742	0	0.133434	0	0.0900039	0
618	0	0	0	0	0	0
619	0	0	0	0	0	0
620	0.0310495	0	0	0	0.0155247	0
621	0	0	0	0	0	0
622	0.0155247	0	0.0571858	0	0.0363553	0
623	0.0620989	0	0.114372	0	0.0882353	0
624	0.0155247	0	0.0190619	0	0.0172933	0
625	0.0620989	0	0.114372	0	0.0882353	0
626	0.0465742	0	0	0	0.0232871	0
627	0.124198	0	0.152495	0	0.138347	0
628	0	0	0	0	0	0
629	0.170772	0	0.209681	0	0.190227	0
630	0.201821	0	0.133434	0	0.167628	0
631	0.0776236	0	0.0762477	0	0.0769357	0
632	0.0620989	0	0.114372	0	0.0882353	0
633	0.124198	0	0	0	0.0620989	0
634	0.667563	0	0.514672	0	0.591118	0
635	0.0155247	0	0.133434	0	0.0744791	0
636	0.0310495	0	0.133434	0	0.0822415	0
637	0.108673	0	0.0571858	0	0.0829295	0
638	0.0155247	0	0.0190619	0	0.0172933	0
639	0.0155247	0	0.133434	0	0.0744791	0
640	0.0465742	0	0	0	0.0232871	0
641	0.108673	0	0.285929	0	0.197301	0
642	0.0465742	0	0.0762477	0	0.061411	0
643	0.0155247	0	0.0381239	0	0.0268243	0
644	0.217346	0	0.152495	0	0.184921	0
645	0.155247	0	0.247805	0	0.201526	0
646	0.217346	0	0.228743	0	0.223045	0
647	0	0	0.0953097	0	0.0476548	0
648	0.0465742	0	0.0381239	0	0.042349	0
649	0.0155247	0	0.0190619	0	0.0172933	0
650	0.0310495	0	0.0190619	0	0.0250557	0
651	0.0310495	0	0.0762477	0	0.0536486	0
652	0	0	0.0953097	0	0.0476548	0
653	0.0776236	0	0.0381239	0	0.0578738	0
654	0.155247	0	0.324053	0	0.23965	0
655	0.186297	0	0.114372	0	0.150334	0
656	0.124198	0	0.0953097	0	0.109754	0
657	0.232871	0	0.209681	0	0.221276	0
658	0.26392	0	0.285929	0	0.274925	0
659	0.279445	0	0.247805	0	0.263625	0
660	0.155247	0	0.228743	0	0.191995	0
661	0.0620989	0	0.0381239	0	0.0501114	0
662	0.124198	0	0.0381239	0	0.0811608	0
663	0.0620989	0	0.0571858	0	0.0596424	0
664	0.155247	0	0.133434	0	0.14434	0
665	0.0776236	0	0.0762477	0	0.0769357	0
666	0	0	0	0	0	0
667	0.0155247	0	0.0190619	0	0.0172933	0
668	0.26392	0	0.228743	0	0.246332	0
669	0.0465742	0	0.0571858	0	0.05188	0
670	0.0310495	0	0.133434	0	0.0822415	0
671	0.0155247	0	0.133434	0	0.0744791	0
672	0.217346	0	0.514672	0	0.366009	0
673	0.0465742	0	0	0	0.0232871	0
674	0.450217	0	0.667168	0	0.558692	0
675	0.0465742	0	0.0571858	0	0.05188	0
676	0.0931484	0	0.0571858	0	0.0751671	0
677	0.217346	0	0.343115	0	0.280231	0
678	0.0465742	0	0.0190619	0	0.0328181	0
679	0.419168	0	0.285929	0	0.352548	0
680	0.326019	0	0.324053	0	0.325036	0
681	0.0465742	0	0.228743	0	0.137659	0
682	0	0	0.0571858	0	0.0285929	0
683	0.0310495	0	0.0381239	0	0.0345867	0
684	0.0465742	0	0.0762477	0	0.061411	0
685	0	0	0.0571858	0	0.0285929	0
686	0	0	0.0953097	0	0.0476548	0
687	0	0	0	0	0	0
688	0.0620989	0	0.152495	0	0.107297	0
689	0.0155247	0	0	0	0.00776236	0
690	0	0	0.0190619	0	0.00953097	0
691	0.0776236	0	0.0381239	0	0.0578738	0
692	0.0465742	0	0.0571858	0	0.05188	0
693	0.124198	0	0.190619	0	0.157409	0
694	0.0620989	0	0.0953097	0	0.0787043	0
695	0.0155247	0	0.0953097	0	0.0554172	0
696	0.0155247	0	0.0381239	0	0.0268243	0
697	0.0465742	0	0.0953097	0	0.0709419	0
698	0.201821	0	0.209681	0	0.205751	0
699	0.139723	0	0.152495	0	0.146109	0
700	0.0465742	0	0.152495	0	0.0995348	0
701	0.419168	0	0.419363	0	0.419265	0
702	0.29497	0	0.59092	0	0.442945	0
703	0.496791	0	0.571858	0	0.534325	0
704	0.0465742	0	0.0381239	0	0.042349	0
705	0.186297	0	0.133434	0	0.159865	0
706	0	0	0.0571858	0	0.0285929	0
707	0.0155247	0	0.0190619	0	0.0172933	0
708	0.0931484	0	0.0571858	0	0.0751671	0
709	0	0	0	0	0	0
710	0	0	0.0571858	0	0.0285929	0
711	0.186297	0	0.285929	0	0.236113	0
712	0.139723	0	0.0381239	0	0.0889232	0
713	0.186297	0	0.190619	0	0.188458	0
714	0.170772	0	0.247805	0	0.209289	0
715	0.326019	0	0.514672	0	0.420346	0
716	0.0155247	0	0.0571858	0	0.0363553	0
717	0.29497	0	0.190619	0	0.242795	0
718	0.55889	0	1.10559	0	0.832241	0
719	0.201821	0	0.171557	0	0.186689	0
720	0.108673	0	0.0762477	0	0.0924604	0
721	0.326019	0	0.190619	0	0.258319	0
722	0	0	0	0	0	0
723	0	0	0	0	0	0
724	0.0310495	0	0.0381239	0	0.0345867	0
725	0.0465742	0	0.0190619	0	0.0328181	0
726	0	0	0	0	0	0
727	0	0	0	0	0	0
728	0	0	0.0381239	0	0.0190619	0
729	0	0	0.0190619	0	0.00953097	0
730	0	0	0	0	0	0
731	0	0	0.0571858	0	0.0285929	0
732	0.139723	0	0.0953097	0	0.117516	0
733	0.108673	0	0.0571858	0	0.0829295	0
734	0.186297	0	0.0571858	0	0.121741	0
735	0.0310495	0	0	0	0.0155247	0
736	0.0310495	0	0.0571858	0	0.0441176	0
737	0.186297	0	0.266867	0	0.226582	0
738	0.0155247	0	0.0953097	0	0.0554172	0
739	0	0	0.0190619	0	0.00953097	0
740	0.0155247	0	0.0190619	0	0.0172933	0
741	0.0310495	0	0.0381239	0	0.0345867	0
742	0.155247	0	0.0762477	0	0.115748	0
743	0.0776236	0	0.171557	0	0.124591	0
744	0.108673	0	0.0762477	0	0.0924604	0
745	0.0310495	0	0	0	0.0155247	0
746	0.0620989	0	0.0762477	0	0.0691733	0
747	0.108673	0	0.0953097	0	0.101991	0
748	0.139723	0	0.0190619	0	0.0793922	0
749	0.170772	0	0.285929	0	0.228351	0
750	0.0931484	0	0.209681	0	0.151415	0
751	0.155247	0	0.400301	0	0.277774	0
752	0.0931484	0	0.0381239	0	0.0656361	0
753	0.201821	0	0.285929	0	0.243875	0
754	0	0	0	0	0	0
755	0	0	0.114372	0	0.0571858	0
756	0.403643	0	0.343115	0	0.373379	0
757	0	0	0.0953097	0	0.0476548	0
758	0.0155247	0	0.0381239	0	0.0268243	0
759	0	0	0	0	0	0
760	0	0	0.0571858	0	0.0285929	0
761	0.0776236	0	0.0571858	0	0.0674047	0
762	0.108673	0	0.114372	0	0.111522	0
763	0.108673	0	0.152495	0	0.130584	0
764	0.0155247	0	0.0190619	0	0.0172933	0
765	0.217346	0	0.247805	0	0.232576	0
766	0.0620989	0	0.0381239	0	0.0501114	0
767	0.0465742	0	0.0381239	0	0.042349	0
768	0.108673	0	0.133434	0	0.121053	0
769	0	0	0.0381239	0	0.0190619	0
770	0.0620989	0	0	0	0.0310495	0
771	0.0155247	0	0.0381239	0	0.0268243	0
772	0	0	0.0190619	0	0.00953097	0
773	0.0620989	0	0.0953097	0	0.0787043	0
774	0	0	0	0	0	0
775	0.0931484	0	0.171557	0	0.132353	0
776	0.248396	0	0.209681	0	0.229038	0
777	0.0310495	0	0.228743	0	0.129896	0
778	0.0931484	0	0.114372	0	0.10376	0
779	0.0776236	0	0.114372	0	0.0959976	0
780	0.139723	0	0.304991	0	0.222357	0
781	0.201821	0	0.266867	0	0.234344	0
782	0.0620989	0	0.0953097	0	0.0787043	0
783	0.0465742	0	0.0190619	0	0.0328181	0
784	0	0	0	0	0	0
785	0	0	0.0381239	0	0.0190619	0
786	0	0	0	0	0	0
787	0.170772	0	0.152495	-0.0190619	0.161634	-0.00953097
788	0.0465742	0	0	0	0.0232871	0
789	0.0310495	0	0.0190619	0	0.0250557	0
790	0.139723	0	0.0381239	0	0.0889232	0
791	0	0	0	0	0	0
792	0	0	0	0	0	0
793	0.0465742	0	0.0571858	0	0.05188	0
794	0.0931484	0	0.152495	0	0.122822	0
795	0.0465742	0	0.0571858	0	0.05188	0
796	0.388118	0	0.552796	0	0.470457	0
797	0.0776236	0	0.133434	0	0.105529	0
798	0.0931484	0	0.0190619	0	0.0561052	0
799	0.0931484	0	0.152495	0	0.122822	0
800	0.201821	0	0.457486	0	0.329654	0
801	0.139723	0	0.0571858	0	0.0984542	0
802	0.0931484	0	0.152495	0	0.122822	0
803	0.232871	0	0.362177	0	0.297524	0
804	0.978058	0	1.06747	0	1.02276	0
805	0.0465742	0	0.0381239	0	0.042349	0
806	0.0155247	0	0.0190619	0	0.0172933	0
807	0.108673	0	0.114372	0	0.111522	0
808	0.0465742	0	0	0	0.0232871	0
809	0.0310495	0	0.0953097	0	0.0631796	0
810	0.0465742	0	0.0190619	0	0.0328181	0
811	0	0	0	0	0	0
812	0.0155247	0	0.0381239	0	0.0268243	0
813	0.108673	0	0	0	0.0543365	0
814	0.248396	0	0.343115	0	0.295755	0
815	0.139723	0	0.0762477	0	0.107985	0
816	0.496791	0	0.629044	0	0.562918	0
817	0.0310495	0	0.0190619	0	0.0250557	0
818	0	0	0	0	0	0
819	0	0	0	0	0	0
820	0.124198	0	0.114372	0	0.119285	0
821	0.0310495	0	0.0381239	0	0.0345867	0
822	0	0	0.0190619	0	0.00953097	0
823	0.0310495	0	0.0381239	0	0.0345867	0
824	0.0465742	0	0	0	0.0232871	0
825	0.0620989	0	0.114372	0	0.0882353	0
826	0	0	0	0	0	0
827	0.0155247	0	0.0190619	0	0.0172933	0
828	0.0310495	0	0.0190619	0	0.0250557	0
829	0.0310495	0	0.0762477	0	0.0536486	0
830	0.0465742	0	0.0190619	0	0.0328181	0
831	0.0155247	0	0.0190619	0	0.0172933	0
832	0.201821	0	0.381239	0	0.29153	0
833	0	0	0.0190619	0	0.00953097	0
834	0.0310495	0	0	0	0.0155247	0
835	0.0155247	0	0.0190619	0	0.0172933	0
836	0.0310495	0	0.0381239	0	0.0345867	0
837	0.108673	0	0.0190619	0	0.0638675	0
838	0.201821	0	0.304991	0	0.253406	0
839	0.0776236	0	0.171557	0	0.124591	0
840	0.124198	0	0.0190619	0	0.0716299	0
841	0.0465742	0	0	0	0.0232871	0
842	0	0	0	0	0	0
843	0	0	0.0190619	0	0.00953097	0
844	0	0	0	0	0	0
845	0.0155247	0	0.0381239	0	0.0268243	0
846	0.0465742	0	0.0571858	0	0.05188	0
847	0	0	0	0	0	0
848	0	0	0	0	0	0
849	0	0	0	0	0	0
850	0.0310495	0	0.0762477	0	0.0536486	0
851	0	0	0.0381239	0	0.0190619	0
852	0.217346	0	0.133434	0	0.17539	0
853	0.0465742	0	0	0	0.0232871	0
854	0.0776236	0	0.0762477	0	0.0769357	0
855	0.0620989	0	0.0381239	0	0.0501114	0
856	0.0776236	0	0.0762477	0	0.0769357	0
857	0.0931484	0	0.0953097	0	0.094229	0
858	0	0	0.0381239	0	0.0190619	0
859	0.108673	0	0.0762477	0	0.0924604	0
860	0.0465742	0	0.0381239	0	0.042349	0
861	0.124198	0	0.0571858	0	0.0906918	0
862	0	0	0	0	0	0
863	0.0465742	0	0.0381239	0	0.042349	0
864	0.0465742	0	0.0571858	0	0.05188	0
865	0.0155247	0	0.0381239	0	0.0268243	0
866	0	0	0	0	0	0
867	0.0620989	0	0.0381239	0	0.0501114	0
868	0.0310495	0	0.0190619	0	0.0250557	0
869	0.108673	0	0.0571858	0	0.0829295	0
870	0.0155247	0	0	0	0.00776236	0
871	0.0620989	0	0.114372	0	0.0882353	0
872	0.108673	0	0.114372	0	0.111522	0
873	0.0155247	0	0	0	0.00776236	0
874	0.29497	0	0.571858	0	0.433414	0
875	0.0620989	0	0.0953097	0	0.0787043	0
876	0.0310495	0	0.0571858	0	0.0441176	0
877	0.0776236	0	0.0953097	0	0.0864667	0
878	0.139723	0	0.247805	0	0.193764	0
879	0.0155247	0	0.0190619	0	0.0172933	0
880	0.0155247	0	0.0571858	0	0.0363553	0
881	0.0776236	0	0.0381239	0	0.0578738	0
882	0.139723	0	0.133434	0	0.136578	0
883	0	0	0.0190619	0	0.00953097	0
884	0.0465742	0	0.0571858	0	0.05188	0
885	0.186297	0	0.114372	0	0.150334	0
886	0.0310495	0	0.0953097	0	0.0631796	0
887	0.0310495	0	0.0762477	0	0.0536486	0
888	0	0	0	0	0	0
889	0.326019	0	0.0953097	0	0.210664	0
890	0.0465742	0	0.0762477	0	0.061411	0
891	0.0931484	0	0.133434	0	0.113291	0
892	0.900434	0	0.914973	0	0.907704	0
893	0.0155247	0	0.0190619	0	0.0172933	0
894	0	0	0	0	0	0
895	0.124198	0	0.152495	0	0.138347	0
896	0	0	0.0381239	0	0.0190619	0
897	0	0	0.0571858	0	0.0285929	0
898	0	0	0	0	0	0
899	0.0155247	0	0	0	0.00776236	0
900	0	0	0.0190619	0	0.00953097	0
901	0.0620989	0	0.0190619	0	0.0405804	0
902	0.108673	0	0.0190619	0	0.0638675	0
903	0.0310495	0	0.0190619	0	0.0250557	0
904	0.0155247	0	0.0190619	0	0.0172933	0
905	0	0	0	0	0	0
906	0	0	0.0381239	0	0.0190619	0
907	0.0155247	0	0.0381239	0	0.0268243	0
908	0.0776236	0	0.0953097	0	0.0864667	0
909	0	0	0.133434	0	0.0667168	0
910	0	0	0	0	0	0
911	0	0	0	0	0	0
912	0.0155247	0	0	0	0.00776236	0
913	0	0	0.0190619	0	0.00953097	0
914	0	0	0.0190619	0	0.00953097	0
915	0.0931484	0	0.0762477	0	0.0846981	0
916	0.0155247	0	0.0381239	0	0.0268243	0
917	0	0	0.0190619	0	0.00953097	0
918	0	0	0.0190619	0	0.00953097	0
919	0	0	0.0190619	0	0.00953097	0
920	0.0465742	0	0	0	0.0232871	0
921	0.0465742	0	0.0571858	0	0.05188	0
922	0.0310495	0	0	0	0.0155247	0
923	0	0	0.0381239	0	0.0190619	0
924	0	0	0	0	0	0
925	0.0310495	0	0.0190619	0	0.0250557	0
926	0.0155247	0	0.0190619	0	0.0172933	0
927	0	0	0.0190619	0	0.00953097	0
928	0.0465742	0	0	0	0.0232871	0
929	0.0155247	0	0	0	0.00776236	0
930	0.0465742	0	0.114372	0	0.0804729	0
931	0.0465742	0	0.0762477	0	0.061411	0
932	0.201821	0	0.209681	0	0.205751	0
933	0.0620989	0	0.0381239	0	0.0501114	0
934	0.0776236	0	0.0571858	0	0.0674047	0
935	0.0310495	0	0.0190619	0	0.0250557	0
936	0	0	0	0	0	0
937	0.139723	0	0.0762477	0	0.107985	0
938	0.186297	0	0.209681	0	0.197989	0
939	0.0776236	0	0.0571858	0	0.0674047	0
940	0.0776236	0	0	0	0.0388118	0
941	0.0155247	0	0.0381239	0	0.0268243	0
942	0.26392	0	0.304991	0	0.284456	0
943	0.0310495	0	0	0	0.0155247	0
944	0.0310495	0	0.0190619	0	0.0250557	0
945	0.0310495	0	0.0381239	0	0.0345867	0
946	0.0155247	0	0.0381239	0	0.0268243	0
947	0.0155247	0	0	0	0.00776236	0
948	0.0155247	0	0.0762477	0	0.0458862	0
949	0.0155247	0	0	0	0.00776236	0
950	0.0310495	0	0	0	0.0155247	0
951	0.108673	0	0.190619	0	0.149646	0
952	0	0	0.0190619	0	0.00953097	0
953	0.481267	0	0.667168	0	0.574217	0
954	0.0776236	0	0.343115	0	0.210369	0
955	0.822811	0	0.934035	0	0.878423	0
956	0.170772	0	0.0953097	0	0.133041	0
957	0.0620989	0	0	0	0.0310495	0
958	0	0	0	0	0	0
959	0	0	0	0	0	0
960	0	0	0	0	0	0
961	0	0	0	0	0	0
962	0	0	0	0	0	0
963	0	0	0	0	0	0
964	0	0	0	0	0	0
965	0.0310495	0	0	0	0.0155247	0
966	0.0155247	0	0.0190619	0	0.0172933	0
967	0.0155247	0	0	0	0.00776236	0
968	0.0310495	0	0	0	0.0155247	0
969	0	0	0	0	0	0
970	0.0155247	0	0.0190619	0	0.0172933	0
971	0	0	0	0	0	0
972	0.0620989	0	0.0190619	0	0.0405804	0
973	0.0155247	0	0	0	0.00776236	0
974	0	0	0	0	0	0
975	0.0620989	0	0.0381239	0	0.0501114	0
976	0	0	0	0	0	0
977	0	0	0	0	0	0
978	0	0	0	0	0	0
979	0.0155247	0	0	0	0.00776236	0
980	0	0	0.0190619	0	0.00953097	0
981	0	0	0	0	0	0
982	0	0	0.0190619	0	0.00953097	0
983	0	0	0	0	0	0
984	0	0	0	0	0	0
985	0	0	0	0	0	0
986	0	0	0	0	0	0
987	0	0	0	0	0	0
988	0	0	0	0	0	0
989	0	0	0	0	0	0
990	0	0	0	0	0	0
991	0	0	0	0	0	0
992	0	0	0	0	0	0
993	0	0	0.0190619	0	0.00953097	0
994	0	0	0	0	0	0
995	0	0	0	0	0	0
996	0	0	0	0	0	0
997	0	0	0	0	0	0
998	0	0	0	0	0	0
999	0	0	0	0	0	0
1000	0	0	0	0	0	0
1001	0	0	0	0	0	0
1002	0.0155247	0	0	0	0.00776236	0
1003	0	0	0	0	0	0
1004	0	0	0	0	0	0
1005	0	0	0	0	0	0
1006	0	0	0	0	0	0
1007	0	0	0	0	0	0
1008	0.0155247	0	0	0	0.00776236	0
1009	0	0	0	0	0	0
1010	0	0	0	0	0	0
1011	0	0	0	0	0	0
1012	0	0	0	0	0	0
1013	0	0	0	0	0	0
1014	0	0	0	0	0	0
1015	0	0	0	0	0	0
1016	0	0	0	0	0	0
1017	0	0	0	0	0	0
1018	0	0	0	0	0	0
1019	0	0	0	0	0	0
1020	0	0	0	0	0	0
1021	0	0	0	0	0	0
1022	0	0	0	0	0	0
1023	0	0	0	0	0	0
1024	0	0	0	0	0	0
1025	0	0	0	0	0	0
1026	0	0	0	0	0	0
1027	0	0	0	0	0	0
1028	0	0	0	0	0	0
1029	0	0	0	0	0	0
1030	0	0	0	0	0	0
1031	0	0	0	0	0	0
1032	0	0	0	0	0	0
1033	0	0	0	0	0	0
1034	0	0	0	0	0	0
1035	0	0	0	0	0	0
1036	0	0	0	0	0	0
1037	0	0	0	0	0	0
1038	0	0	0	0	0	0
1039	0	0	0	0	0	0
1040	0	0	0	0	0	0
1041	0	0	0	0	0	0
1042	0	0	0	0	0	0
1043	0	0	0	0	0	0
1044	0	0	0	0	0	0
1045	0	0	0	0	0	0
1046	0	0	0	0	0	0
1047	0	0	0	0	0	0
1048	0	0	0	0	0	0
1049	0	0	0	0	0	0
1050	0	0	0	0	0	0
1051	0	0	0	0	0	0
1052	0	0	0	0	0	0
1053	0	0	0	0	0	0
1054	0	0	0	0	0	0
1055	0	0	0	0	0	0
1056	0	0	0	0	0	0
1057	0	0	0	0	0	0
1058	0	0	0	0	0	0
1059	0	0	0	0	0	0
1060	0	0	0	0	0	0
1061	0	0	0	0	0	0
1062	0	0	0	0	0	0
1063	0	0	0	0	0	0
1064	0	0	0	0	0	0
1065	0	0	0	0	0	0
1066	0	0	0	0	0	0
1067	0	0	0	0	0	0
1068	0	0	0	0	0	0
1069	0	0	0	0	0	0
1070	0	0	0	0	0	0
1071	0	0	0	0	0	0
1072	0	0	0	0	0	0
1073	0	0	0	0	0	0
1074	0	0	0	0	0	0
1075	0	0	0	0	0	0
1076	0	0	0	0	0	0
1077	0	0	0	0	0	0
1078	0	0	0	0	0	0
1079	0	0	0	0	0	0
1080	0	0	0	0	0	0
1081	0	0	0	0	0	0
1082	0	0	0	0	0	0
1083	0	0	0	0	0	0
1084	0	0	0	0	0	0
1085	0	0	0	0	0	0
1086	0	0	0	0	0	0
1087	0	0	0	0	0	0
1088	0	0	0	0	0	0
1089	0	0	0	0	0	0
1090	0	0	0	0	0	0
1091	0	0	0	0	0	0
1092	0	0	0	0	0	0
1093	0	0	0	0	0	0
1094	0	0	0	0	0	0
1095	0	0	0	0	0	0
1096	0	0	0	0	0	0
1097	0	0	0	0	0	0
1098	0	0	0	0	0	0
1099	0	0	0	0	0	0
1100	0	0	0	0	0	0
1101	0	0	0	0	0	0
1102	0	0	0	0	0	0
1103	0	0	0	-0.0190619	0	-0.00953097
1104	0	-0.0155247	0	0	0	-0.00776236
1105	0	-0.0465742	0	0	0	-0.0232871
1106	0	-0.0155247	0	-0.0190619	0	-0.0172933
1107	0	0	0	0	0	0
1108	0	-0.0155247	0	-0.0190619	0	-0.0172933
1109	0	-0.0465742	0	-0.0571858	0	-0.05188
1110	0	0	0	-0.0190619	0	-0.00953097
1111	0	0	0	0	0	0
1112	0	-0.0155247	0	-0.0381239	0	-0.0268243
1113	0	0	0	-0.0381239	0	-0.0190619
1114	0	0	0	0	0	0
1115	0	-0.0931484	0	-0.114372	0	-0.10376
1116	0	0	0	-0.0381239	0	-0.0190619
1117	0	-0.0465742	0	0	0	-0.0232871
1118	0	-0.0155247	0	0	0	-0.00776236
1119	0	-0.0310495	0	-0.0190619	0	-0.0250557
1120	0	0	0	-0.133434	0	-0.0667168
1121	0	0	0	0	0	0
1122	0	0	0	0	0	0
1123	0	-0.0155247	0	0	0	-0.00776236
1124	0	0	0	-0.0190619	0	-0.00953097
1125	0	0	0	0	0	0
1126	0	0	0	0	0	0
1127	0	0	0	-0.114372	0	-0.0571858
1128	0	0	0	0	0	0
1129	0	-0.0620989	0	-0.190619	0	-0.126359
1130	0	0	0	0	0	0
1131	0	-0.0310495	0	0	0	-0.0155247
1132	0	0	0	0	0	0
1133	0	0	0	0	0	0
1134	0	0	0	-0.0190619	0	-0.00953097
1135	0	0	0	0	0	0
1136	0	-0.0155247	0	0	0	-0.00776236
1137	0	0	0	0	0	0
1138	0	0	0	0	0	0
1139	0	0	0	-0.0190619	0	-0.00953097
1140	0	-0.0155247	0	0	0	-0.00776236
1141	0	0	0	-0.0190619	0	-0.00953097
1142	0	0	0	0	0	0
1143	0	-0.0620989	0	0	0	-0.0310495
1144	0	-0.0155247	0	-0.0571858	0	-0.0363553
1145	0	0	0	0	0	0
1146	0	0	0	0	0	0
1147	0	0	0	0	0	0
1148	0	0	0	0	0	0
1149	0	0	0	0	0	0
1150	0	0	0	0	0	0
1151	0	-0.0155247	0	0	0	-0.00776236
1152	0	-0.0310495	0	0	0	-0.0155247
1153	0	-0.0155247	0	-0.0190619	0	-0.0172933
1154	0	0	0.0190619	0	0.00953097	0
1155	0	-0.0155247	0	0	0	-0.00776236
1156	0	-0.0465742	0	-0.0953097	0	-0.0709419
1157	0	0	0	0	0	0
1158	0	-0.0776236	0	-0.0190619	0	-0.0483428
1159	0	0	0	-0.0381239	0	-0.0190619
1160	0	0	0	0	0	0
1161	0	-0.0155247	0	-0.0190619	0	-0.0172933
1162	0	-0.0465742	0	-0.0190619	0	-0.0328181
1163	0	-0.248396	0	-0.343115	0	-0.295755
1164	0	-0.139723	0	-0.457486	0	-0.298605
1165	0	-0.0465742	0	-0.114372	0	-0.0804729
1166	0	-0.0155247	0	-0.0571858	0	-0.0363553
1167	0	-0.0310495	0	-0.0571858	0	-0.0441176
1168	0	-0.0310495	0	-0.114372	0	-0.0727105
1169	0	-0.0155247	0	-0.0762477	0	-0.0458862
1170	0	0	0	0	0	0
1171	0	0	0	0	0	0
1172	0	0	0	-0.0190619	0	-0.00953097
1173	0	-0.0155247	0	0	0	-0.00776236
1174	0	0	0	0	0	0
1175	0	0	0	0	0	0
1176	0	-0.0620989	0	-0.0381239	0	-0.0501114
1177	0	-0.0776236	0	-0.0190619	0	-0.0483428
1178	0	0	0	0	0	0
1179	0	0	0	0	0	0
1180	0	0	0	0	0	0
1181	0	0	0	0	0	0
1182	0	0	0	0	0	0
1183	0	0	0	-0.0190619	0	-0.00953097
1184	0	0	0	0	0	0
1185	0	0	0	0	0	0
1186	0	0	0	0	0	0
1187	0	0	0	0	0	0
1188	0	0	0	0	0	0
1189	0	0	0	0	0	0
1190	0	0	0	0	0	0
1191	0	0	0	0	0	0
1192	0	0	0	0	0	0
1193	0	0	0	-0.0381239	0	-0.0190619
1194	0	0	0	-0.0190619	0	-0.00953097
1195	0	0	0	0	0	0
1196	0	0	0	0	0	0
1197	0	0	0	0	0	0
1198	0	0	0	0	0	0
1199	0	0	0.0190619	0	0.00953097	0
1200	0	-0.0155247	0	-0.0190619	0	-0.0172933
1201	0	-0.0155247	0	0	0	-0.00776236
1202	0	0	0	0	0	0
1203	0	0	0	0	0	0
1204	0	0	0	0	0	0
1205	0	0	0	0	0	0
1206	0	-0.0310495	0	0	0	-0.0155247
1207	0	-0.0776236	0	-0.133434	0	-0.105529
1208	0	-0.0155247	0	-0.0381239	0	-0.0268243
1209	0	0	0	0	0	0
1210	0	0	0	0	0	0
1211	0	0	0	0	0	0
1212	0	0	0	0	0	0
1213	0	0	0	-0.0381239	0	-0.0190619
1214	0	0	0	-0.0190619	0	-0.00953097
1215	0	0	0	0	0	0
1216	0	0	0	0	0	0
1217	0	-0.0465742	0	-0.0381239	0	-0.042349
1218	0	0	0	-0.0190619	0	-0.00953097
1219	0	-0.0931484	0	-0.152495	0	-0.122822
1220	0	0	0	-0.0953097	0	-0.0476548
1221	0	0	0	-0.0571858	0	-0.0285929
1222	0	-0.0310495	0	-0.0381239	0	-0.0345867
1223	0	0	0	0	0	0
1224	0	0	0	0	0	0
1225	0	0	0	-0.0190619	0	-0.00953097
1226	0	-0.0155247	0	-0.0190619	0	-0.0172933
1227	0	0	0.0190619	0	0.00953097	0
1228	0	-0.0155247	0	0	0	-0.00776236
1229	0	0	0	0	0	0
1230	0	0	0	0	0	0
1231	0	0	0	0	0	0
1232	0	-0.0155247	0	-0.0381239	0	-0.0268243
1233	0	-0.0776236	0	-0.0571858	0	-0.0674047
1234	0	-0.0310495	0	-0.114372	0	-0.0727105
1235	0	-0.0931484	0	-0.0762477	0	-0.0846981
1236	0	-0.0155247	0	-0.0381239	0	-0.0268243
1237	0	0	0	-0.171557	0	-0.0857787
1238	0	-0.0155247	0	-0.0571858	0	-0.0363553
1239	0	-0.0155247	0.0190619	-0.0190619	0.00953097	-0.0172933
1240	0	0	0	-0.0190619	0	-0.00953097
1241	0	0	0	-0.0381239	0	-0.0190619
1242	0	0	0	0	0	0
1243	0	0	0	0	0	0
1244	0	0	0	0	0	0
1245	0	-0.155247	0	-0.438425	0	-0.296836
1246	0	-0.0310495	0	-0.152495	0	-0.0917725
1247	0	-0.139723	0	-0.0571858	0	-0.0984542
1248	0	-0.0465742	0	0	0	-0.0232871
1249	0	-0.0155247	0	-0.0571858	0	-0.0363553
1250	0	-0.155247	0	-0.514672	0	-0.33496
1251	0	-0.0310495	0	-0.0571858	0	-0.0441176
1252	0	-0.0776236	0	-0.171557	0	-0.124591
1253	0	-0.0931484	0	-0.0571858	0	-0.0751671
1254	0	-0.0776236	0	-0.0953097	0	-0.0864667
1255	0	-0.0155247	0	-0.0762477	0	-0.0458862
1256	0	-0.0465742	0	-0.0190619	0	-0.0328181
1257	0	-0.0931484	0	-0.114372	0	-0.10376
1258	0	-0.310495	0	-0.362177	0	-0.336336
1259	0	0	0	-0.0190619	0	-0.00953097
1260	0	-0.108673	0	-0.0762477	0	-0.0924604
1261	0	0	0	-0.0381239	0	-0.0190619
1262	0	-0.0155247	0	0	0	-0.00776236
1263	0	-0.0155247	0	-0.0571858	0	-0.0363553
1264	0	-0.0310495	0	0	0	-0.0155247
1265	0	-0.108673	0	-0.0190619	0	-0.0638675
1266	0	0	0	0	0	0
1267	0	-0.0155247	0	-0.0381239	0	-0.0268243
1268	0	-0.822811	0	-0.68623	0	-0.75452
1269	0	-0.0155247	0	-0.152495	0	-0.0840101
1270	0	-0.248396	0	-0.266867	0	-0.257631
1271	0	-0.0310495	0	-0.133434	0	-0.0822415
1272	0	-0.0310495	0	-0.0381239	0	-0.0345867
1273	0	0	0	0	0	0
1274	0	0	0	-0.0190619	0	-0.00953097
1275	0	0	0	0	0	0
1276	0	-0.170772	0	-0.209681	0	-0.190227
1277	0	-0.0310495	0	-0.0571858	0	-0.0441176
1278	0	-0.0310495	0	-0.0190619	0	-0.0250557
1279	0	0	0	-0.0381239	0	-0.0190619
1280	0	0	0	0	0	0
1281	0	-0.0155247	0	-0.0762477	0	-0.0458862
1282	0	-0.0155247	0	0	0	-0.00776236
1283	0	0	0	-0.0190619	0	-0.00953097
1284	0	0	0	0	0	0
1285	0	-0.0310495	0	-0.0571858	0	-0.0441176
1286	0	0	0	0	0	0
1287	0	-0.0310495	0	-0.0190619	0	-0.0250557
1288	0	0	0	0	0	0
1289	0	-0.0931484	0	-0.133434	0	-0.113291
1290	0	-0.0465742	0	-0.114372	0	-0.0804729
1291	0	-0.124198	0	-0.228743	0	-0.176471
1292	0	-0.0620989	0	-0.190619	0	-0.126359
1293	0	-0.0465742	0	-0.0571858	0	-0.05188
1294	0	-0.0465742	0	-0.0381239	0	-0.042349
1295	0	0	0	-0.0381239	0	-0.0190619
1296	0	-0.0155247	0	-0.0381239	0	-0.0268243
1297	0	0	0	-0.0571858	0	-0.0285929
1298	0	-0.0776236	0	-0.0953097	0	-0.0864667
1299	0	-0.0155247	0	0	0	-0.00776236
1300	0	0	0	-0.0190619	0	-0.00953097
1301	0	-0.0155247	0	-0.0190619	0	-0.0172933
1302	0	-0.0465742	0	-0.0381239	0	-0.042349
1303	0	-0.139723	0	-0.304991	0	-0.222357
1304	0	-0.0931484	0	-0.114372	0	-0.10376
1305	0	-0.0465742	0	-0.209681	0	-0.128128
1306	0	-0.155247	0	-0.247805	0	-0.201526
1307	0	0	0	-0.114372	0	-0.0571858
1308	0	-0.0310495	0	-0.0381239	0	-0.0345867
1309	0	-0.0155247	0	0	0	-0.00776236
1310	0	0	0	0	0	0
1311	0	-0.0310495	0	-0.0190619	0	-0.0250557
1312	0	-0.0155247	0	-0.0571858	0	-0.0363553
1313	0	-0.0310495	0	-0.0190619	0	-0.0250557
1314	0	-0.0776236	0	-0.152495	0	-0.11506
1315	0	-0.0620989	0	-0.114372	0	-0.0882353
1316	0	-0.0931484	0	-0.0762477	0	-0.0846981
1317	0	-0.0776236	0	-0.0762477	0	-0.0769357
1318	0	-0.0931484	0	-0.343115	0	-0.218132
1319	0	-0.0155247	0	0	0	-0.00776236
1320	0	-0.0155247	0	0	0	-0.00776236
1321	0	-0.0620989	0	-0.0762477	0	-0.0691733
1322	0	0	0	-0.0190619	0	-0.00953097
1323	0	-0.0465742	0	-0.0190619	0	-0.0328181
1324	0	-0.0620989	0	-0.209681	0	-0.13589
1325	0	0	0	-0.0190619	0	-0.00953097
1326	0	-0.0931484	0	-0.0953097	0	-0.094229
1327	0	-0.512316	0	-0.953097	0	-0.732706
1328	0	0	0	0	0	0
1329	0	-0.0776236	0	-0.0571858	0	-0.0674047
1330	0	-0.0465742	0	0	0	-0.0232871
1331	0	-0.0310495	0	0	0	-0.0155247
1332	0	-0.0310495	0	-0.0953097	0	-0.0631796
1333	0	0	0	-0.0571858	0	-0.0285929
1334	0	-0.0465742	0	-0.0381239	0	-0.042349
1335	0	-0.0620989	0	-0.0571858	0	-0.0596424
1336	0	-0.0155247	0	-0.0190619	0	-0.0172933
1337	0	-0.0776236	0	-0.0762477	0	-0.0769357
1338	0	-0.170772	0	-0.171557	0	-0.171165
1339	0	-0.0620989	0	-0.0762477	0	-0.0691733
1340	0	-0.0155247	0	-0.0381239	0	-0.0268243
1341	0	0	0	0	0	0
1342	0	-0.0620989	0	0	0	-0.0310495
1343	0	-0.0620989	0	-0.0762477	0	-0.0691733
1344	0	-0.0310495	0	-0.0381239	0	-0.0345867
1345	0	-0.0465742	0	-0.114372	0	-0.0804729
1346	0	-0.0310495	0	-0.0953097	0	-0.0631796
1347	0	0	0	0	0	0
1348	0	0	0	-0.0381239	0	-0.0190619
1349	0	0	0	-0.0190619	0	-0.00953097
1350	0	0	0	0	0	0
1351	0	0	0	0	0	0
1352	0	0	0	-0.0381239	0	-0.0190619
1353	0	0	0	0	0	0
1354	0	-0.201821	0	-0.381239	0	-0.29153
1355	0	-0.0155247	0	0	0	-0.00776236
1356	0	-0.0310495	0	-0.114372	0	-0.0727105
1357	0	-0.0931484	0	-0.114372	0	-0.10376
1358	0	-0.0155247	0	0	0	-0.00776236
1359	0	-0.186297	0	-0.209681	0	-0.197989
1360	0	-0.29497	0	-0.667168	0	-0.481069
1361	0	0	0	-0.0381239	0	-0.0190619
1362	0	-0.0620989	0	-0.114372	0	-0.0882353
1363	0	-0.201821	0	-0.400301	0	-0.301061
1364	0	-0.0465742	0	-0.0953097	0	-0.0709419
1365	0	-0.0620989	0	-0.0571858	0	-0.0596424
1366	0	-0.0776236	0	-0.133434	0	-0.105529
1367	0	-0.0310495	0	-0.0190619	0	-0.0250557
1368	0	0	0	-0.0190619	0	-0.00953097
1369	0	-0.0155247	0	-0.0571858	0	-0.0363553
1370	0	-0.0776236	0	-0.0571858	0	-0.0674047
1371	0	-0.124198	0	-0.133434	0	-0.128816
1372	0	0	0	0	0	0
1373	0	-0.0931484	0	-0.0762477	0	-0.0846981
1374	0	-0.124198	0	-0.0381239	0	-0.0811608
1375	0	-0.0310495	0	-0.0953097	0	-0.0631796
1376	0	-0.139723	0	-0.133434	0	-0.136578
1377	0	-0.0465742	0	-0.0762477	0	-0.061411
1378	0.0155247	-0.0465742	0	-0.0953097	0.00776236	-0.0709419
1379	0	-0.0465742	0	0	0	-0.0232871
1380	0	-0.0310495	0	-0.0571858	0	-0.0441176
1381	0	-0.0465742	0	-0.0381239	0	-0.042349
1382	0	-0.0776236	0	-0.114372	0	-0.0959976
1383	0	-0.0465742	0	-0.0190619	0	-0.0328181
1384	0	-0.108673	0	-0.0381239	0	-0.0733985
1385	0	-0.0155247	0	-0.0571858	0	-0.0363553
1386	0	-0.170772	0	-0.266867	0	-0.21882
1387	0	-0.232871	0	-0.343115	0	-0.287993
1388	0	-0.0155247	0	0	0	-0.00776236
1389	0	-0.155247	0	-0.0571858	0	-0.106217
1390	0	0	0	0	0	0
1391	0	-0.155247	0	-0.171557	0	-0.163402
1392	0	0	0	-0.0190619	0	-0.00953097
1393	0	0	0	0	0	0
1394	0	-0.0310495	0	-0.0381239	0	-0.0345867
1395	0	-0.0776236	0	-0.114372	0	-0.0959976
1396	0	-0.0155247	0	-0.0190619	0	-0.0172933
1397	0	-0.0155247	0	-0.133434	0	-0.0744791
1398	0	-0.0465742	0	0	0	-0.0232871
1399	0	-0.0155247	0	-0.0762477	0	-0.0458862
1400	0	-0.0465742	0	-0.0381239	0	-0.042349
1401	0	0	0	0	0	0
1402	0	-0.108673	0	-0.247805	0	-0.178239
1403	0	-0.0620989	0	-0.0190619	0	-0.0405804
1404	0	0	0	-0.0381239	0	-0.0190619
1405	0	-0.0155247	0	0	0	-0.00776236
1406	0	-0.0155247	0	-0.0190619	0	-0.0172933
1407	0	-0.0155247	0	-0.114372	0	-0.0649482
1408	0	-0.0776236	0	-0.0571858	0	-0.0674047
1409	0	-0.0155247	0	-0.133434	0	-0.0744791
1410	0	-0.0155247	0	-0.0190619	0	-0.0172933
1411	0	0	0	-0.0381239	0	-0.0190619
1412	0	-0.0155247	0	0	0	-0.00776236
1413	0	-0.0465742	0	-0.0953097	0	-0.0709419
1414	0	0	0	-0.0190619	0	-0.00953097
1415	0	-0.0155247	0	-0.0381239	0	-0.0268243
1416	0	-0.0310495	0	-0.0190619	0	-0.0250557
1417	0	0	0	0	0	0
1418	0	-0.0310495	0	-0.0190619	0	-0.0250557
1419	0	-0.0620989	0	-0.228743	0	-0.145421
1420	0	-0.155247	0	-0.0571858	0	-0.106217
1421	0	-0.0310495	0	-0.0571858	0	-0.0441176
1422	0	-0.155247	0	-0.133434	0	-0.14434
1423	0	-0.155247	0	-0.190619	0	-0.172933
1424	0	-0.0155247	0	-0.0381239	0	-0.0268243
1425	0	0	0	-0.171557	0	-0.0857787
1426	0	-0.0155247	0	-0.0762477	0	-0.0458862
1427	0	-0.0155247	0	0	0	-0.00776236
1428	0	-0.0465742	0	0	0	-0.0232871
1429	0	0	0	0	0	0
1430	0	0	0	-0.0381239	0	-0.0190619
1431	0	0	0	0	0	0
1432	0	-0.0155247	0	-0.209681	0	-0.112603
1433	0	-0.170772	0	-0.381239	0	-0.276005
1434	0	-0.310495	0	-0.400301	0	-0.355398
1435	0	-0.26392	0	-0.59092	0	-0.42742
1436	0	-0.0620989	0	-0.0953097	0	-0.0787043
1437	0	-0.0465742	0	-0.0381239	0	-0.042349
1438	0	0	0	-0.114372	0	-0.0571858
1439	0	-0.0310495	0	-0.0571858	0	-0.0441176
1440	0	-0.0465742	0	-0.133434	0	-0.0900039
1441	0	-0.0620989	0	-0.0762477	0	-0.0691733
1442	0	-0.0155247	0	0	0	-0.00776236
1443	0	-0.0155247	0	-0.0381239	0	-0.0268243
1444	0	-0.0155247	0	-0.0190619	0	-0.0172933
1445	0	-0.0155247	0	0	0	-0.00776236
1446	0	-0.0155247	0	-0.0190619	0	-0.0172933
1447	0	-0.0310495	0	-0.0953097	0	-0.0631796
1448	0	-0.0310495	0	-0.0190619	0	-0.0250557
1449	0	-0.0776236	0	-0.133434	0	-0.105529
1450	0	0	0	0	0	0
1451	0	-0.0465742	0	-0.0381239	0	-0.042349
1452	0	0	0	-0.0190619	0	-0.00953097
1453	0	-0.0310495	0	-0.0571858	0	-0.0441176
1454	0	-0.0776236	0	-0.209681	0	-0.143652
1455	0	-0.0310495	0	-0.0953097	0	-0.0631796
1456	0	0	0	0	0	0
1457	0	-0.0465742	0	-0.0953097	0	-0.0709419
1458	0	-0.0620989	0	-0.209681	0	-0.13589
1459	0	-0.0310495	0	-0.0762477	0	-0.0536486
1460	0	-0.0931484	0	0	0	-0.0465742
1461	0	0	0	-0.114372	0	-0.0571858
1462	0	-0.0310495	0	-0.0571858	0	-0.0441176
1463	0	-0.0776236	0	-0.133434	0	-0.105529
1464	0	-0.0465742	0	-0.0762477	0	-0.061411
1465	0	-0.0155247	0	-0.0381239	0	-0.0268243
1466	0	-0.0310495	0	-0.114372	0	-0.0727105
1467	0	-0.0931484	0	-0.114372	0	-0.10376
1468	0	-0.170772	0	-0.324053	0	-0.247412
1469	0	-0.108673	0	-0.190619	0	-0.149646
1470	0	-0.0931484	0	-0.0953097	0	-0.094229
1471	0	0	0	-0.114372	0	-0.0571858
1472	0	-0.0465742	0	-0.152495	0	-0.0995348
1473	0	-0.0620989	0	0	0	-0.0310495
1474	0	-0.108673	0	-0.133434	0	-0.121053
1475	0	-0.0465742	0	-0.247805	0	-0.14719
1476	0	-0.0155247	0	-0.0571858	0	-0.0363553
1477	0	-0.0931484	0	-0.152495	0	-0.122822
1478	0	-0.0620989	0	-0.0571858	0	-0.0596424
1479	0	0	0	0	0	0
1480	0	-0.0310495	0	-0.0571858	0	-0.0441176
1481	0	0	0	-0.0190619	0	-0.00953097
1482	0	-0.0155247	0	-0.114372	0	-0.0649482
1483	0	-0.155247	0	-0.171557	0	-0.163402
1484	0	-0.0465742	0	-0.0762477	0	-0.061411
1485	0	-0.0155247	0	-0.0190619	0	-0.0172933
1486	0	-0.0310495	0	-0.190619	0	-0.110834
1487	0	-0.124198	0	-0.0381239	0	-0.0811608
1488	0	-0.0465742	0	-0.0190619	0	-0.0328181
1489	0	-0.108673	0	-0.0953097	0	-0.101991
1490	0	-0.279445	0	-0.400301	0	-0.339873
1491	0	0	0	-0.114372	0	-0.0571858
1492	0	-0.0465742	0	-0.0381239	0	-0.042349
1493	0	-0.0931484	0	-0.152495	0	-0.122822
1494	0	-0.0776236	0	-0.209681	0	-0.143652
1495	0	-0.0310495	0	-0.0762477	0	-0.0536486
1496	0	-0.0310495	0	-0.114372	0	-0.0727105
1497	0	0	0	-0.0190619	0	-0.00953097
1498	0	-0.0310495	0	-0.0571858	0	-0.0441176
1499	0	-0.0155247	0	-0.0571858	0	-0.0363553
1500	0	0	0	-0.0381239	0	-0.0190619
1501	0	-0.0465742	0	-0.133434	0	-0.0900039
1502	0	-0.0310495	0	-0.133434	0	-0.0822415
1503	0	-0.108673	0	-0.152495	0	-0.130584
1504	0	-0.155247	0	-0.0953097	0	-0.125278
1505	0	-0.0776236	0	-0.0762477	0	-0.0769357
1506	0	0	0	-0.0381239	0	-0.0190619
1507	0	-0.0776236	0	-0.114372	0	-0.0959976
1508	0	-0.0465742	0	-0.0190619	0	-0.0328181
1509	0	-0.0931484	0	-0.209681	0	-0.151415
1510	0	-0.0931484	0	-0.209681	0	-0.151415
1511	0	-0.0310495	0	-0.171557	0	-0.101303
1512	0	-0.0155247	0	0	0	-0.00776236
1513	0	-0.108673	0	-0.0381239	0	-0.0733985
1514	0	0	0	0	0	0
1515	0	-0.108673	0	-0.0762477	0	-0.0924604
1516	0	-0.0310495	0	-0.0571858	0	-0.0441176
1517	0	-0.170772	0	-0.209681	0	-0.190227
1518	0	-0.0931484	0	-0.152495	0	-0.122822
1519	0	-0.0155247	0	-0.0571858	0	-0.0363553
1520	0	-0.0776236	0	-0.133434	0	-0.105529
1521	0	-0.108673	0	-0.285929	0	-0.197301
1522	0	-0.0310495	0	-0.0381239	0	-0.0345867
1523	0	-0.0155247	0	-0.0571858	0	-0.0363553
1524	0	0	0	0	0	0
1525	0	0	0	-0.0190619	0	-0.00953097
1526	0	0	0	0	0	0
1527	0	-0.0310495	0	-0.0571858	0	-0.0441176
1528	0	-0.0465742	0	-0.0571858	0	-0.05188
1529	0	-0.0155247	0	0	0	-0.00776236
1530	0	0	0	-0.0190619	0	-0.00953097
1531	0	-0.0310495	0	0	0	-0.0155247
1532	0	-0.0465742	0	-0.133434	0	-0.0900039
1533	0	0	0	-0.0381239	0	-0.0190619
1534	0	-0.108673	0	-0.0953097	0	-0.101991
1535	0	-0.0155247	0	-0.0953097	0	-0.0554172
1536	0	0	0	0	0	0
1537	0	-0.139723	0	-0.0953097	0	-0.117516
1538	0	-0.0155247	0	0	0	-0.00776236
1539	0	-0.155247	0	-0.381239	0	-0.268243
1540	0	-0.0310495	0	-0.0381239	0	-0.0345867
1541	0	-0.0776236	0	-0.152495	0	-0.11506
1542	0	-0.0310495	0	-0.152495	0	-0.0917725
1543	0	-0.0155247	0	-0.0381239	0	-0.0268243
1544	0	-0.0310495	0	0	0	-0.0155247
1545	0	-0.0155247	0	-0.0190619	0	-0.0172933
1546	0	-0.186297	0.0190619	-0.552796	0.00953097	-0.369546
1547	0	-0.155247	0	-0.0571858	0	-0.106217
1548	0	0	0	-0.0190619	0	-0.00953097
1549	0	-0.0465742	0	-0.114372	0	-0.0804729
1550	0	-0.0310495	0	-0.0762477	0	-0.0536486
1551	0	-0.0465742	0	0	0	-0.0232871
1552	0	-0.0465742	0	-0.0762477	0	-0.061411
1553	0	0	0	-0.0381239	0	-0.0190619
1554	0	0	0	-0.0190619	0	-0.00953097
1555	0	-0.0776236	0	-0.0381239	0	-0.0578738
1556	0	0	0	0	0	0
1557	0	-0.0155247	0	-0.0571858	0	-0.0363553
1558	0	-0.0155247	0	-0.0190619	0	-0.0172933
1559	0	0	0	0	0	0
1560	0	0	0	-0.0190619	0	-0.00953097
1561	0	-0.0310495	0	0	0	-0.0155247
1562	0	-0.0776236	0	-0.0762477	0	-0.0769357
1563	0	0	0	-0.0190619	0	-0.00953097
1564	0	0	0	-0.0190619	0	-0.00953097
1565	0	-0.0620989	0	-0.0190619	0	-0.0405804
1566	0	-0.0620989	0	-0.0381239	0	-0.0501114
1567	0	-0.0155247	0	-0.0762477	0	-0.0458862
1568	0	0	0	0	0	0
1569	0	-0.0310495	0	-0.0953097	0	-0.0631796
1570	0	0	0	0	0	0
1571	0	0	0	-0.0381239	0	-0.0190619
1572	0	0	0	-0.0190619	0	-0.00953097
1573	0	0	0	-0.0190619	0	-0.00953097
1574	0	0	0	0	0	0
1575	0	-0.0155247	0	-0.133434	0	-0.0744791
1576	0	-0.0465742	0	-0.0762477	0	-0.061411
1577	0	-0.0155247	0	-0.0381239	0	-0.0268243
1578	0	0	0	-0.0381239	0	-0.0190619
1579	0	-0.0155247	0	0	0	-0.00776236
1580	0	-0.0620989	0	-0.0762477	0	-0.0691733
1581	0	-0.0155247	0	0	0	-0.00776236
1582	0	-0.0620989	0	-0.133434	0	-0.0977662
1583	0	-0.0465742	0	-0.0381239	0	-0.042349
1584	0	0	0	0	0	0
1585	0	0	0	-0.0190619	0	-0.00953097
1586	0	0	0	0	0	0
1587	0	-0.0776236	0	-0.114372	0	-0.0959976
1588	0	-0.0465742	0	-0.0190619	0	-0.0328181
1589	0	-0.0155247	0	-0.0381239	0	-0.0268243
1590	0	0	0	0	0	0
1591	0	-0.0155247	0	-0.0190619	0	-0.0172933
1592	0	0	0	-0.0190619	0	-0.00953097
1593	0	0	0	0	0	0
1594	0	-0.0310495	0	-0.0381239	0	-0.0345867
1595	0	0	0	0	0	0
1596	0	0	0	-0.0381239	0	-0.0190619
1597	0	-0.0620989	0	-0.0190619	0	-0.0405804
1598	0	-0.0155247	0	0	0	-0.00776236
1599	0	0	0	-0.0190619	0	-0.00953097
1600	0	-0.0620989	0	-0.0953097	0	-0.0787043
1601	0	-0.0776236	0	-0.0381239	0	-0.0578738
1602	0	-0.0155247	0	0	0	-0.00776236
1603	0	0	0	-0.0190619	0	-0.00953097
1604	0	-0.108673	0	-0.266867	0	-0.18777
1605	0	-0.0155247	0	0	0	-0.00776236
1606	0	-0.0465742	0	-0.0381239	0	-0.042349
1607	0	0	0	-0.0190619	0	-0.00953097
1608	0	0	0	-0.0381239	0	-0.0190619
1609	0	0	0	0	0	0
1610	0	-0.0310495	0	-0.0762477	0	-0.0536486
1611	0	0	0	-0.0190619	0	-0.00953097
1612	0	0	0	0	0	0
1613	0	0	0	0	0	0
1614	0	0	0	0	0	0
1615	0	-0.0310495	0	0	0	-0.0155247
1616	0	-0.0310495	0	-0.0571858	0	-0.0441176
1617	0	-0.0155247	0	0	0	-0.00776236
1618	0	0	0	-0.0190619	0	-0.00953097
1619	0	0	0	-0.0381239	0	-0.0190619
1620	0	-0.0310495	0	-0.0190619	0	-0.0250557
1621	0	0	0	0	0	0
1622	0	0	0	0	0	0
1623	0	-0.0465742	0	0	0	-0.0232871
1624	0	0	0	0	0	0
1625	0	-0.0155247	0	-0.0190619	0	-0.0172933
1626	0	0	0	0	0	0
1627	0	-0.0155247	0	-0.0762477	0	-0.0458862
1628	0	0	0	0	0	0
1629	0	0	0	-0.0190619	0	-0.00953097
1630	0	-0.0465742	0	-0.0953097	0	-0.0709419
1631	0	0	0	-0.0571858	0	-0.0285929
1632	0	-0.0155247	0	-0.0762477	0	-0.0458862
1633	0	0	0	0	0	0
1634	0	0	0	-0.0571858	0	-0.0285929
1635	0	-0.0155247	0	0	0	-0.00776236
1636	0	0	0	0	0	0
1637	0	0	0	0	0	0
1638	0	0	0	0	0	0
1639	0	0	0	-0.0571858	0	-0.0285929
1640	0	-0.0465742	0	0	0	-0.0232871
1641	0	0	0	0	0	0
1642	0	-0.0155247	0	-0.0190619	0	-0.0172933
1643	0	0	0	0	0	0
1644	0	0	0	-0.0190619	0	-0.00953097
1645	0	-0.0310495	0	-0.0381239	0	-0.0345867
1646	0	-0.0155247	0	0	0	-0.00776236
1647	0	0	0	0	0	0
1648	0	-0.0155247	0	0	0	-0.00776236
1649	0	-0.0155247	0	0	0	-0.00776236
1650	0	0	0	-0.0190619	0	-0.00953097
1651	0	0	0	0	0	0
1652	0	-0.0155247	0	0	0	-0.00776236
1653	0	-0.0155247	0	0	0	-0.00776236
1654	0	0	0	0	0	0
1655	0	-0.0155247	0	-0.0381239	0	-0.0268243
1656	0	-0.0620989	0	-0.0381239	0	-0.0501114
1657	0	-0.0155247	0	-0.0190619	0	-0.0172933
1658	0	-0.0155247	0	0	0	-0.00776236
1659	0	0	0	0	0	0
1660	0	0	0	-0.0190619	0	-0.00953097
1661	0	-0.0620989	0	-0.0190619	0	-0.0405804
1662	0	-0.0155247	0	0	0	-0.00776236
1663	0	0	0	0	0	0
1664	0	0	0	0	0	0
1665	0	-0.0310495	0	0	0	-0.0155247
1666	0	0	0	0	0	0
1667	0	0	0	-0.0190619	0	-0.00953097
1668	0	0	0	0	0	0
1669	0	0	0	-0.0190619	0	-0.00953097
1670	0	-0.0155247	0	0	0	-0.00776236
1671	0	0	0	-0.0190619	0	-0.00953097
1672	0	-0.0155247	0	0	0	-0.00776236
1673	0	0	0	0	0	0
1674	0	-0.0620989	0	-0.0381239	0	-0.0501114
1675	0	-0.0776236	0	-0.0381239	0	-0.0578738
1676	0	-0.0155247	0	-0.0381239	0	-0.0268243
1677	0	-0.0155247	0	0	0	-0.00776236
1678	0	0	0	0	0	0
1679	0	-0.0155247	0	0	0	-0.00776236
1680	0	-0.0155247	0	0	0	-0.00776236
1681	0	-0.0155247	0	-0.228743	0	-0.122134
1682	0	0	0	-0.0381239	0	-0.0190619
1683	0	0	0	0	0	0
1684	0	-0.0155247	0	0	0	-0.00776236
1685	0	-0.0465742	0	-0.0571858	0	-0.05188
1686	0	-0.0310495	0	-0.0762477	0	-0.0536486
1687	0	-0.0620989	0	-0.0381239	0	-0.0501114
1688	0	-0.0155247	0	-0.0762477	0	-0.0458862
1689	0	-0.0155247	0	-0.0571858	0	-0.0363553
1690	0	-0.0155247	0	0	0	-0.00776236
1691	0	-0.0155247	0	0	0	-0.00776236
1692	0	0	0	0	0	0
1693	0	0	0	-0.0190619	0	-0.00953097
1694	0	-0.0155247	0	0	0	-0.00776236
1695	0	0	0	0	0	0
1696	0	0	0	0	0	0
1697	0	-0.0310495	0	-0.0190619	0	-0.0250557
1698	0	0	0	0	0	0
1699	0	-0.0310495	0	0	0	-0.0155247
1700	0	0	0	0	0	0
1701	0	-0.0155247	0	0	0	-0.00776236
1702	0	-0.0155247	0	0	0	-0.00776236
1703	0	-0.0620989	0	0	0	-0.0310495
1704	0	0	0	0	0	0
1705	0	0	0	-0.0190619	0	-0.00953097
1706	0	-0.0155247	0	0	0	-0.00776236
1707	0	-0.0155247	0	0	0	-0.00776236
1708	0	0	0	-0.0381239	0	-0.0190619
1709	0	0	0	0	0	0
1710	0	0	0	0	0	0
1711	0	0	0	0	0	0
1712	0	0	0	0	0	0
1713	0	0	0	-0.0190619	0	-0.00953097
1714	0	0	0	0	0	0
1715	0	0	0	0	0	0
1716	0	-0.0465742	0	-0.0190619	0	-0.0328181
1717	0	-0.0155247	0	0	0	-0.00776236
1718	0	-0.0310495	0	0	0	-0.0155247
1719	0	0	0	0	0	0
1720	0	0	0	0	0	0
1721	0	-0.0155247	0	0	0	-0.00776236
1722	0	0	0	0	0	0
1723	0	0	0	0	0	0
1724	0	0	0	-0.0190619	0	-0.00953097
1725	0	0	0	0	0	0
1726	0	0	0	0	0	0
1727	0	0	0	-0.0190619	0	-0.00953097
1728	0	0	0	-0.0190619	0	-0.00953097
1729	0	0	0	0	0	0
1730	0	0	0	0	0	0
1731	0	0	0	0	0	0
1732	0	0	0	0	0	0
1733	0	0	0	0	0	0
1734	0	0	0	0	0	0
1735	0	0	0	0	0	0
1736	0	0	0	-0.0190619	0	-0.00953097
1737	0	0	0	-0.0381239	0	-0.0190619
1738	0	0	0	0	0	0
1739	0	0	0	-0.0190619	0	-0.00953097
1740	0	0	0	0	0	0
1741	0	-0.0155247	0	0	0	-0.00776236
1742	0	0	0	-0.0190619	0	-0.00953097
1743	0	0	0	0	0	0
1744	0	0	0	0	0	0
1745	0	0	0	0	0	0
1746	0	0	0.0190619	0	0.00953097	0
1747	0	0	0	0	0	0
1748	0	0	0	-0.0190619	0	-0.00953097
1749	0	0	0	0	0	0
1750	0	-0.0155247	0	-0.0190619	0	-0.0172933
1751	0	-0.0155247	0	0	0	-0.00776236
1752	0	-0.0155247	0	-0.0190619	0	-0.0172933
1753	0	0	0	-0.0190619	0	-0.00953097
1754	0	0	0	-0.0190619	0	-0.00953097
1755	0	-0.0155247	0	0	0	-0.00776236
1756	0	0	0	-0.0381239	0	-0.0190619
1757	0	0	0	-0.0571858	0	-0.0285929
1758	0	-0.0310495	0	-0.0571858	0	-0.0441176
1759	0	-0.0310495	0	-0.0381239	0	-0.0345867
1760	0	-0.0465742	0	0	0	-0.0232871
1761	0	-0.0155247	0	0	0	-0.00776236
1762	0	0	0	0	0	0
1763	0	0	0	0	0	0
1764	0	-0.0155247	0	-0.0190619	0	-0.0172933
1765	0	0	0	0	0	0
1766	0	0	0	0	0	0
1767	0	0	0	0	0	0
1768	0	-0.0310495	0	-0.0190619	0	-0.0250557
1769	0	-0.0155247	0	-0.0190619	0	-0.0172933
1770	0	-0.139723	0	-0.133434	0	-0.136578
1771	0	-0.0155247	0	0	0	-0.00776236
1772	0	-0.0310495	0	0	0	-0.0155247
1773	0	0	0	0	0	0
1774	0	0	0	0	0	0
1775	0	-0.0310495	0	0	0	-0.0155247
1776	0	-0.0155247	0	0	0	-0.00776236
1777	0	0	0	0	0	0
1778	0	-0.0155247	0	0	0	-0.00776236
1779	0	0	0	-0.0190619	0	-0.00953097
1780	0	-0.0155247	0	-0.0762477	0	-0.0458862
1781	0	0	0	0	0	0
1782	0	-0.0310495	0	-0.0381239	0	-0.0345867
1783	0	-0.0155247	0	-0.0190619	0	-0.0172933
1784	0	0	0	0	0	0
1785	0	0	0	0	0	0
1786	0	0	0	0	0	0
1787	0	0	0	0	0	0
1788	0	-0.0155247	0	0	0	-0.00776236
1789	0	0	0	0	0	0
1790	0	0	0	0	0	0
1791	0	0	0	0	0	0
1792	0	-0.0155247	0	0	0	-0.00776236
1793	0	-0.0155247	0	-0.0381239	0	-0.0268243
1794	0	0	0	-0.0762477	0	-0.0381239
1795	0	-0.0155247	0	-0.0953097	0	-0.0554172
1796	0	0	0	0	0	0
1797	0	-0.0155247	0	-0.0190619	0	-0.0172933
1798	0	0	0	-0.0571858	0	-0.0285929
1799	0	0	0	0	0	0
1800	0	0	0	-0.0381239	0	-0.0190619
1801	0	0	0.0190619	0	0.00953097	0
1802	0	0	0	0	0	0
1803	0	0	0	0	0	0
1804	0	-0.0155247	0	0	0	-0.00776236
1805	0	-0.0776236	0	-0.0762477	0	-0.0769357
1806	0	-0.0155247	0	-0.0381239	0	-0.0268243
1807	0	-0.0155247	0	-0.0381239	0	-0.0268243
1808	0	0	0	0	0	0
1809	0	0	0	0	0	0
1810	0	0	0	-0.0190619	0	-0.00953097
1811	0	0	0	0	0	0
1812	0	0	0	0	0	0
1813	0	0	0	0	0	0
1814	0	0	0	0	0	0
1815	0	0	0	0	0	0
1816	0	0	0	0	0	0
1817	0	0	0	0	0	0
1818	0	0	0	-0.0190619	0	-0.00953097
1819	0	0	0	0	0	0
1820	0	0	0	0	0	0
1821	0	0	0	0	0	0
1822	0	0	0	0	0	0
1823	0	0	0	0	0	0
1824	0	-0.0155247	0	0	0	-0.00776236
1825	0	-0.0310495	0	-0.0190619	0	-0.0250557
1826	0	0	0	0	0	0
1827	0	-0.0155247	0	0	0	-0.00776236
1828	0	0	0	-0.0190619	0	-0.00953097
1829	0	-0.0155247	0	0	0	-0.00776236
1830	0	-0.0155247	0	0	0	-0.00776236
1831	0	0	0	0	0	0
1832	0	-0.0465742	0	-0.0190619	0	-0.0328181
1833	0	0	0	0	0	0
1834	0	-0.0155247	0	-0.0190619	0	-0.0172933
1835	0.0155247	0	0	0	0.00776236	0
1836	0	-0.0155247	0	-0.0190619	0	-0.0172933
1837	0	0	0	0	0	0
1838	0	-0.0155247	0	0	0	-0.00776236
1839	0	0	0	0	0	0
1840	0	0	0	0	0	0
1841	0	0	0	0	0	0
1842	0	0	0	0	0	0
1843	0	-0.0155247	0	0	0	-0.00776236
1844	0	0	0	-0.0190619	0	-0.00953097
1845	0	0	0	0	0	0
1846	0	0	0	-0.0190619	0	-0.00953097
1847	0.0155247	-0.0465742	0	0	0.00776236	-0.0232871
1848	0	-0.0310495	0	0	0	-0.0155247
1849	0	0	0	0	0	0
1850	0	0	0	0	0	0
1851	0	0	0	-0.0190619	0	-0.00953097
1852	0	0	0	0	0	0
1853	0	-0.0310495	0	-0.0381239	0	-0.0345867
1854	0	-0.0155247	0	-0.0762477	0	-0.0458862
1855	0	-0.0620989	0	-0.0190619	0	-0.0405804
1856	0	-0.0465742	0	-0.152495	0	-0.0995348
1857	0	0	0.0190619	-0.133434	0.00953097	-0.0667168
1858	0	0	0	-0.0190619	0	-0.00953097
1859	0	0	0	-0.0381239	0	-0.0190619
1860	0	-0.0155247	0	-0.0381239	0	-0.0268243
1861	0	0	0	0	0	0
1862	0	0	0	0	0	0
1863	0	-0.0155247	0	0	0	-0.00776236
1864	0	0	0	0	0	0
1865	0	-0.0155247	0	0	0	-0.00776236
1866	0	0	0	0	0	0
1867	0	0	0	0	0	0
1868	0	0	0	0	0	0
1869	0	-0.0465742	0	-0.152495	0	-0.0995348
1870	0	0	0	0	0	0
1871	0	-0.0465742	0	0	0	-0.0232871
1872	0	-0.0310495	0	-0.0190619	0	-0.0250557
1873	0	0	0	0	0	0
1874	0	0	0	0	0	0
1875	0	0	0	-0.0190619	0	-0.00953097
1876	0	0	0	-0.0190619	0	-0.00953097
1877	0	0	0	0	0	0
1878	0	0	0	0	0	0
1879	0	-0.0155247	0	0	0	-0.00776236
1880	0	0	0	0	0	0
1881	0	-0.0155247	0.0190619	0	0.00953097	-0.00776236
1882	0	0	0	0	0	0
1883	0	-0.0155247	0	-0.0190619	0	-0.0172933
1884	0	0	0	0	0	0
1885	0	0	0	0	0	0
1886	0	0	0	0	0	0
1887	0	0	0.0190619	0	0.00953097	0
1888	0	-0.0155247	0	0	0	-0.00776236
1889	0	-0.0465742	0	-0.0381239	0	-0.042349
1890	0	0	0	-0.0381239	0	-0.0190619
1891	0	0	0	0	0	0
1892	0	0	0	0	0	0
1893	0	-0.0155247	0	0	0	-0.00776236
1894	0	0	0	-0.0381239	0	-0.0190619
1895	0	-0.0155247	0	-0.0190619	0	-0.0172933
1896	0	0	0	0	0	0
1897	0	0	0	0	0	0
1898	0	-0.0155247	0	-0.0190619	0	-0.0172933
1899	0	0	0	0	0	0
1900	0	-0.0155247	0	0	0	-0.00776236
1901	0	-0.0155247	0	-0.0190619	0	-0.0172933
1902	0	0	0	0	0	0
1903	0	-0.0155247	0	0	0	-0.00776236
1904	0	0	0	0	0	0
1905	0	0	0	0	0	0
1906	0	0	0	0	0	0
1907	0	0	0	0	0	0
1908	0	0	0	0	0	0
1909	0	0	0	0	0	0
1910	0	0	0	-0.0381239	0	-0.0190619
1911	0	0	0	0	0	0
1912	0	0	0	0	0	0
1913	0	-0.0310495	0.0190619	-0.0381239	0.00953097	-0.0345867
1914	0	0	0	0	0	0
1915	0	0	0	0	0	0
1916	0	0	0	-0.0381239	0	-0.0190619
1917	0	0	0	0	0	0
1918	0	0	0	0	0	0
1919	0	-0.0310495	0	0	0	-0.0155247
1920	0	0	0	0	0	0
1921	0	-0.0310495	0	-0.0571858	0	-0.0441176
1922	0	0	0	0	0	0
1923	0	0	0	0	0	0
1924	0	0	0	0	0	0
1925	0	0	0	0	0	0
1926	0	0	0	0	0	0
1927	0	-0.0310495	0	0	0	-0.0155247
1928	0	0	0	0	0	0
1929	0	0	0	0	0	0
1930	0	0	0	0	0	0
1931	0	-0.0155247	0	-0.0190619	0	-0.0172933
1932	0	0	0	-0.0190619	0	-0.00953097
1933	0	0	0	0	0	0
1934	0	0	0	0	0	0
1935	0	-0.0155247	0	0	0	-0.00776236
1936	0	0	0	0	0	0
1937	0	-0.0310495	0	-0.0381239	0	-0.0345867
1938	0	-0.0155247	0	0	0	-0.00776236
1939	0	0	0	0	0	0
1940	0	-0.0155247	0	-0.0190619	0	-0.0172933
1941	0	0	0	-0.0381239	0	-0.0190619
1942	0	0	0	0	0	0
1943	0	-0.0620989	0	0	0	-0.0310495
1944	0.0155247	-0.170772	0	-0.343115	0.00776236	-0.256943
1945	0	0	0	-0.0190619	0	-0.00953097
1946	0	-0.0310495	0	0	0	-0.0155247
1947	0.0155247	-0.0620989	0	0	0.00776236	-0.0310495
1948	0	-0.0620989	0	-0.0190619	0	-0.0405804
1949	0	0	0	0	0	0
1950	0	0	0	0	0	0
1951	0	-0.0155247	0	-0.0381239	0	-0.0268243
1952	0	0	0	0	0	0
1953	0	-0.0155247	0	0	0	-0.00776236
1954	0	0	0	0	0	0
1955	0	0	0	0	0	0
1956	0	0	0	0	0	0
1957	0	0	0	0	0	0
1958	0	0	0	0	0	0
1959	0	-0.0465742	0	-0.0190619	0	-0.0328181
1960	0	0	0	0	0	0
1961	0	-0.0310495	0	0	0	-0.0155247
1962	0	-0.0465742	0	-0.0190619	0	-0.0328181
1963	0	0	0	0	0	0
1964	0	0	0	-0.0190619	0	-0.00953097
1965	0	0	0	0	0	0
1966	0	0	0	0	0	0
1967	0	0	0	0	0	0
1968	0	0	0	0	0	0
1969	0	0	0	0	0	0
1970	0	0	0	0	0	0
1971	0	0	0	0	0	0
1972	0	0	0	0	0	0
1973	0	0	0	0	0	0
1974	0	-0.0155247	0	0	0	-0.00776236
1975	0	-0.0155247	0	0	0	-0.00776236
1976	0	0	0	0	0	0
1977	0	0	0	0	0	0
1978	0	0	0	0	0	0
1979	0	-0.0155247	0	0	0	-0.00776236
1980	0	0	0	0	0	0
1981	0	0	0	0	0	0
1982	0	0	0	-0.0762477	0	-0.0381239
1983	0	-0.0310495	0	-0.0762477	0	-0.0536486
1984	0	0	0	0	0	0
1985	0	-0.0310495	0	0	0	-0.0155247
1986	0	0	0	0	0	0
1987	0	0	0	0	0	0
1988	0	0	0	-0.114372	0	-0.0571858
1989	0	0	0	0	0	0
1990	0	0	0	0	0	0
1991	0	0	0	0	0	0
1992	0	0	0	0	0	0
1993	0	0	0	0	0	0
1994	0	0	0	-0.0381239	0	-0.0190619
1995	0	0	0	0	0	0
1996	0	0	0	0	0	0
1997	0	-0.0155247	0	0	0	-0.00776236
1998	0	0	0	0	0	0
1999	0	0	0	-0.0381239	0	-0.0190619
[truncated: 782 more rows]

## Sheet: S-IS76 10dpi (IS76)
position	fwd 1	rev 1	fwd 2	rev 2	rightward	leftward
1	0	0	0	0	0	0
2	0	0	0	0	0	0
3	0	0	0	0	0	0
4	0	0	0	0	0	0
5	0	0	0	0	0	0
6	0	0	0	0	0	0
7	0	0	0	0	0	0
8	0	0	0	0	0	0
9	0	0	0	0	0	0
10	0	0	0.0162135	0	0.00810677	0
11	0	0	0	-0.0162135	0	-0.00810677
12	0	0	0	0	0	0
13	0	0	0	0	0	0
14	0	0	0	0	0	0
15	0	0	0	0	0	0
16	0	0	0	0	0	0
17	0	0	0	0	0	0
18	0.015724	0	0	0	0.00786202	0
19	0	-0.015724	0	-0.0162135	0	-0.0159688
20	0	0	0	0	0	0
21	0	0	0	0	0	0
22	0	0	0	0	0	0
23	0	0	0	0	0	0
24	0	0	0	0	0	0
25	0	0	0	0	0	0
26	0	0	0	0	0	0
27	0	0	0	0	0	0
28	0	0	0	0	0	0
29	0	0	0	0	0	0
30	0	0	0	0	0	0
31	0	0	0	0	0	0
32	0	0	0	0	0	0
33	0	0	0	0	0	0
34	0	0	0	0	0	0
35	0.015724	0	0	0	0.00786202	0
36	0.015724	0	0	0	0.00786202	0
37	0	0	0	0	0	0
38	0	0	0	0	0	0
39	0.015724	0	0	-0.0162135	0.00786202	-0.00810677
40	0.0314481	0	0	0	0.015724	0
41	0	0	0	0	0	0
42	0	0	0	0	0	0
43	0	0	0.0162135	0	0.00810677	0
44	0	0	0.0162135	0	0.00810677	0
45	0	0	0	0	0	0
46	0.0314481	0	0	0	0.015724	0
47	0	-0.015724	0	-0.0162135	0	-0.0159688
48	0	0	0	0	0	0
49	0	0	0	0	0	0
50	0	0	0	0	0	0
51	0	0	0	0	0	0
52	0	0	0	0	0	0
53	0	0	0	0	0	0
54	0	0	0	0	0	0
55	0	0	0	0	0	0
56	0	0	0	0	0	0
57	0	0	0	0	0	0
58	0	0	0	0	0	0
59	0	0	0	0	0	0
60	0	0	0	0	0	0
61	0	0	0	0	0	0
62	0.015724	0	0.0324271	0	0.0240756	0
63	0.0314481	0	0	0	0.015724	0
64	0	0	0	0	0	0
65	0	0	0	0	0	0
66	0	0	0	0	0	0
67	0	0	0	0	0	0
68	0	0	0	0	0	0
69	0	0	0	0	0	0
70	0.0471721	0	0.0162135	0	0.0316928	0
71	0	0	0	0	0	0
72	0	0	0	0	0	0
73	0.015724	0	0	0	0.00786202	0
74	0.0628962	0	0	0	0.0314481	0
75	0	0	0	0	0	0
76	0	0	0	0	0	0
77	0	0	0	0	0	0
78	0	0	0	0	0	0
79	0	0	0	0	0	0
80	0.015724	0	0.0324271	0	0.0240756	0
81	0	0	0.0162135	0	0.00810677	0
82	0	0	0	0	0	0
83	0	0	0	0	0	0
84	0	0	0.0162135	0	0.00810677	0
85	0	0	0	0	0	0
86	0	0	0	0	0	0
87	0	0	0	0	0	0
88	0.0314481	0	0	0	0.015724	0
89	0	0	0	0	0	0
90	0	0	0	0	0	0
91	0	0	0.0324271	0	0.0162135	0
92	0.0314481	-0.015724	0.0648542	0	0.0481511	-0.00786202
93	0	0	0	0	0	0
94	0	0	0	-0.0324271	0	-0.0162135
95	0	0	0	0	0	0
96	0	0	0	0	0	0
97	0	0	0.0162135	0	0.00810677	0
98	0	0	0	0	0	0
99	0.015724	0	0	0	0.00786202	0
100	0	0	0	0	0	0
101	0.0314481	0	0.0324271	0	0.0319376	0
102	0	0	0	0	0	0
103	0	0	0	0	0	0
104	0	0	0	0	0	0
105	0	0	0	0	0	0
106	0	0	0	0	0	0
107	0	0	0	0	0	0
108	0	0	0	-0.0162135	0	-0.00810677
109	0	0	0	0	0	0
110	0	0	0	0	0	0
111	0.0314481	0	0	0	0.015724	0
112	0	0	0	0	0	0
113	0	0	0	0	0	0
114	0	0	0	0	0	0
115	0.015724	0	0	0	0.00786202	0
116	0.0314481	0	0.0324271	0	0.0319376	0
117	0	0	0	0	0	0
118	0	0	0	-0.0162135	0	-0.00810677
119	0	0	0	0	0	0
120	0	0	0.0162135	0	0.00810677	0
121	0.0314481	0	0.0162135	0	0.0238308	0
122	0	-0.0314481	0.0162135	0	0.00810677	-0.015724
123	0	0	0.0162135	0	0.00810677	0
124	0	0	0	0	0	0
125	0.015724	0	0.129708	0	0.0727162	0
126	0.0628962	0	0.0162135	0	0.0395549	0
127	0.015724	0	0	0	0.00786202	0
128	0.015724	-0.015724	0.0324271	0	0.0240756	-0.00786202
129	0	0	0.0162135	0	0.00810677	0
130	0	0	0.0162135	0	0.00810677	0
131	0.015724	0	0	0	0.00786202	0
132	0	0	0	0	0	0
133	0	0	0	0	0	0
134	0	0	0.0162135	0	0.00810677	0
135	0	0	0.0486406	0	0.0243203	0
136	0.015724	0	0.0162135	0	0.0159688	0
137	0	0	0.0162135	-0.0162135	0.00810677	-0.00810677
138	0	0	0	0	0	0
139	0	0	0.0162135	0	0.00810677	0
140	0	0	0.0162135	0	0.00810677	0
141	0	0	0	0	0	0
142	0.015724	0	0.0486406	0	0.0321823	0
143	0	0	0.0162135	0	0.00810677	0
144	0.172964	0	0.259417	0	0.216191	0
145	0.0628962	0	0.0810677	0	0.0719819	0
146	0.0943443	0	0.178349	0	0.136347	0
147	0.0628962	0	0.0324271	0	0.0476616	0
148	1.83971	0	2.82116	0	2.33043	0
149	0.550342	0	1.10252	0	0.826431	0
150	1.06923	0	1.50786	0	1.28855	0
151	0.345929	0	0.405338	0	0.375634	0
152	1.54096	0	1.7997	0	1.67033	0
153	1.61958	0	1.78349	0	1.70153	0
154	2.16992	0	3.33999	0	2.75495	0
155	0.833374	0	1.08631	0	0.959841	0
156	0.141516	0	0.129708	0	0.135612	0
157	0.361653	0	0.453979	0	0.407816	0
158	0.220137	0	0.421552	0	0.320844	0
159	0.0628962	0	0.129708	0	0.0963022	0
160	0.534617	0	0.55126	0	0.542939	0
161	0.361653	0	0.340484	0	0.351069	0
162	0.220137	0	0.535047	0	0.377592	0
163	0.518893	0	0.680969	0	0.599931	0
164	0.0943443	0	0.0972812	0	0.0958127	0
165	1.94978	0	2.3996	0	2.17469	0
166	0.267309	-0.015724	0.599901	0	0.433605	-0.00786202
167	0.880546	0	1.32951	-0.0162135	1.10503	-0.00810677
168	0.864822	0	0.956599	0	0.910711	0
169	1.02206	0	1.88077	0	1.45142	0
170	0.833374	0	1.75106	0	1.29222	0
171	0.110068	0	0.129708	0	0.119888	0
172	0.0628962	0	0.0486406	0	0.0557684	0
173	0.0628962	0	0.0810677	0	0.0719819	0
174	0.015724	0	0.0648542	0	0.0402891	0
175	0.0628962	0	0.129708	0	0.0963022	0
176	0.188689	0	0.178349	0	0.183519	0
177	0.110068	0	0.129708	0	0.119888	0
178	0.110068	0	0.113495	0	0.111782	0
179	0.566066	0	0.599901	0	0.582983	0
180	0.125792	0	0.0972812	0	0.111537	0
181	0.440273	0	0.372911	0	0.406592	0
182	0.330205	0	0.340484	0	0.335345	0
183	0.0314481	0	0	0	0.015724	0
184	0.440273	0	0.567474	0	0.503874	0
185	0.110068	0	0.178349	0	0.144209	0
186	0.0786202	-0.015724	0.356698	0	0.217659	-0.00786202
187	0.0786202	0	0.113495	0	0.0960575	0
188	0.0314481	0	0.0810677	0	0.0562579	0
189	0.754754	0	0.859318	0	0.807036	0
190	0.172964	0	0.405338	0	0.289151	0
191	0.172964	0	0.324271	0	0.248618	0
192	0.267309	0	0.486406	0	0.376857	0
193	0.141516	0	0.291844	0	0.21668	0
194	0.015724	0	0.0324271	0	0.0240756	0
195	0.015724	0	0.162135	-0.0162135	0.0889297	-0.00810677
196	0.298757	0	0.713396	0	0.506076	0
197	0.015724	0	0	0	0.00786202	0
198	0.172964	-0.015724	0.259417	0	0.216191	-0.00786202
199	0.204413	-0.015724	0.22699	0	0.215701	-0.00786202
200	0.125792	0	0.194562	0	0.160177	0
201	0.015724	0	0.0972812	0	0.0565026	0
202	0.0471721	0	0.0972812	0	0.0722267	0
203	0.188689	0	0.194562	0	0.191625	0
204	0.0314481	0	0	0	0.015724	0
205	0.15724	0	0.210776	0	0.184008	0
206	0.267309	0	0.389125	0	0.328217	0
207	0.015724	0	0.129708	0	0.0727162	0
208	0.015724	0	0.0162135	0	0.0159688	0
209	0.330205	0	0.259417	0	0.294811	0
210	0.455997	0	0.616114	0	0.536056	0
211	0.125792	0	0.0972812	0	0.111537	0
212	0.172964	0	0.210776	0	0.19187	0
213	0.204413	0	0.372911	0	0.288662	0
214	0.0471721	0	0.0648542	0	0.0560131	0
215	0	0	0.0162135	0	0.00810677	0
216	0.110068	0	0.0648542	0	0.0874612	0
217	0.141516	0	0.0324271	0	0.0869717	0
218	0.0786202	0	0.0324271	0	0.0555236	0
219	0.015724	0	0	0	0.00786202	0
220	0.314481	0	0.372911	0	0.343696	0
221	0.424549	0	0.243203	0	0.333876	0
222	0.015724	0	0.0162135	0	0.0159688	0
223	0.015724	0	0.0486406	0	0.0321823	0
224	0.613238	-0.0471721	0.713396	0	0.663317	-0.0235861
225	0.676134	0	0.729609	0	0.702872	0
226	1.43089	0	1.07009	0	1.25049	0
227	0.188689	0	0.389125	0	0.288907	0
228	0.172964	0	0.291844	0	0.232404	0
229	0.125792	0	0.113495	0	0.119644	0
230	0.0943443	0	0.0810677	0	0.087706	0
231	0.89627	0	0.713396	0	0.804833	0
232	0.235861	0	0.243203	0	0.239532	0
233	1.54096	0	1.73485	0	1.6379	0
234	0.361653	0	0.453979	0	0.407816	0
235	2.53157	0	3.72911	0	3.13034	0
236	0.471721	-0.015724	0.632328	0	0.552025	-0.00786202
237	0.424549	-0.015724	0.470193	0	0.447371	-0.00786202
238	0.613238	0	0.875531	0	0.744384	0
239	0.330205	0	0.486406	0	0.408306	0
240	1.46234	0	1.443	0	1.45267	0
241	0.345929	0	0.697182	0	0.521556	0
242	1.82399	0	1.92941	0	1.8767	0
243	0.518893	0	0.405338	0	0.462116	0
244	0.141516	0	0.145922	0	0.143719	0
245	0.314481	0	0.50262	0	0.40855	0
246	2.18564	-0.015724	2.5131	0	2.34937	-0.00786202
247	0.864822	0	0.940385	0	0.902604	0
248	0.440273	0	0.50262	0	0.471446	0
249	0.974891	0	0.729609	0	0.85225	0
250	0.283033	0	0.437766	0	0.360399	0
251	0.377377	0	0.421552	0	0.399465	0
252	0.58179	0	0.583687	0	0.582738	0
253	0.314481	0	0.27563	0	0.295056	0
254	0.15724	0	0.210776	0	0.184008	0
255	0.408825	0	0.405338	0	0.407082	0
256	0.393101	0	0.437766	0	0.415433	0
257	0.440273	0	0.405338	0	0.422806	0
258	1.76109	0	1.84834	0	1.80472	0
259	0.393101	0	0.340484	0	0.366793	0
260	0.125792	0	0.291844	0	0.208818	0
261	0.125792	0	0.129708	0	0.12775	0
262	0.267309	-0.015724	0.421552	0	0.34443	-0.00786202
263	0.125792	0	0.27563	0	0.200711	0
264	0.0628962	0	0.0810677	0	0.0719819	0
265	0.125792	0	0.194562	0	0.160177	0
266	0.204413	0	0.22699	0	0.215701	0
267	0.361653	0	0.291844	0	0.326748	0
268	0.314481	0	0.340484	0	0.327483	0
269	0.0314481	0	0.0486406	0	0.0400444	0
270	0.283033	0	0.210776	0	0.246904	0
271	0.0628962	0	0.0162135	0	0.0395549	0
272	2.21709	-0.015724	2.2699	0	2.24349	-0.00786202
273	0.110068	0	0.243203	0	0.176636	0
274	0.377377	0	0.437766	-0.0162135	0.407571	-0.00810677
275	0.220137	0	0.259417	0	0.239777	0
276	0.880546	0	0.907958	0	0.894252	0
277	3.61653	0	5.07484	0	4.34568	0
278	0.0943443	0	0.0486406	0	0.0714924	0
279	0.283033	0	0.405338	0	0.344186	0
280	0.0628962	0	0.0648542	0	0.0638752	0
281	0.503169	0	0.567474	0	0.535322	0
282	0.0471721	0	0.0810677	0	0.0641199	0
283	0.0943443	0	0.0486406	0	0.0714924	0
284	0.314481	0	0.486406	0	0.400444	0
285	0.0471721	0	0.0972812	0	0.0722267	0
286	0.251585	0	0.27563	0	0.263607	0
287	0.188689	0	0.210776	0	0.199732	0
288	1.44661	0	1.71864	0	1.58262	0
289	0.534617	0	0.50262	0	0.518619	0
290	0.377377	0	0.291844	0	0.33461	0
291	0.990615	0	0.745823	0	0.868219	0
292	0.377377	0	0.470193	0	0.423785	0
293	0.864822	0	0.664755	0	0.764789	0
294	0.676134	0	0.599901	0	0.638017	0
295	0.283033	0	0.308057	0	0.295545	0
296	0.235861	0	0.583687	0	0.409774	0
297	0.330205	0	0.453979	0	0.392092	0
298	0.251585	0	0.405338	0	0.328462	0
299	0.314481	0	0.356698	0	0.335589	0
300	0.298757	-0.015724	0.259417	0	0.279087	-0.00786202
301	0.424549	0	0.372911	0	0.39873	0
302	2.56302	0	2.35096	0	2.45699	0
303	0.0943443	-0.015724	0.129708	0	0.112026	-0.00786202
304	0.518893	0	0.372911	0	0.445902	0
305	0.251585	0	0.178349	0	0.214967	0
306	0.125792	0	0.145922	0	0.135857	0
307	0.361653	0	0.356698	0	0.359175	0
308	0.0471721	0	0.0486406	0	0.0479064	0
309	0.377377	0	0.437766	0	0.407571	0
310	0.283033	0	0.27563	0	0.279331	0
311	0.0628962	0	0.0972812	0	0.0800887	0
312	1.85544	0	1.39436	0	1.6249	0
313	0.440273	0	0.697182	0	0.568728	0
314	2.51585	0	2.46446	0	2.49015	0
315	0.487445	0	0.535047	0	0.511246	0
316	0.487445	0	0.664755	0	0.5761	0
317	0.377377	0	0.27563	0	0.326504	0
318	0.345929	0	0.210776	0	0.278352	0
319	0.15724	0	0.210776	0	0.184008	0
320	0.597514	0	0.372911	0	0.485213	0
321	0.172964	0	0.243203	0	0.208084	0
322	0.204413	0	0.0324271	0	0.11842	0
323	1.14786	0	0.713396	0	0.930625	0
324	2.31143	0	2.77251	0	2.54197	0
325	0.880546	0	0.956599	0	0.918573	0
326	0.597514	0	0.82689	0	0.712202	0
327	3.50646	0	3.53455	0	3.52051	0
328	0.361653	0	0.405338	0	0.383496	0
329	0.314481	0	0.324271	0	0.319376	0
330	0.314481	0	0.308057	0	0.311269	0
331	0.141516	0	0.0810677	0	0.111292	0
332	0.0628962	0	0.145922	0	0.104409	0
333	0.0628962	0	0.0972812	0	0.0800887	0
334	0.267309	0	0.389125	0	0.328217	0
335	1.02206	0	0.940385	0	0.981224	0
336	0.172964	0	0.372911	0	0.272938	0
337	0.89627	0	1.28087	0	1.08857	0
338	0.235861	0	0.0972812	0	0.166571	0
339	0.204413	0	0.0972812	0	0.150847	0
340	0.172964	0	0.162135	0	0.16755	0
341	1.13213	0	0.907958	0	1.02004	0
342	0.267309	0	0.324271	0	0.29579	0
343	3.36495	0	3.48591	0	3.42543	0
344	0.691858	0	0.907958	0	0.799908	0
345	0.455997	0	0.616114	0	0.536056	0
346	0.204413	0	0.324271	0	0.264342	0
347	0.314481	0	0.794463	0	0.554472	0
348	1.3051	0	1.50786	0	1.40648	0
349	0.0471721	0	0.0810677	0	0.0641199	0
350	0.0786202	0	0.145922	0	0.112271	0
351	0.0943443	0	0.129708	0	0.112026	0
352	0.487445	0	0.55126	0	0.519353	0
353	0.503169	0	0.486406	0	0.494788	0
354	1.38372	0	1.88077	0	1.63224	0
355	0.172964	0	0.243203	0	0.208084	0
356	0.0314481	0	0.0162135	0	0.0238308	0
357	0.251585	0	0.210776	0	0.23118	0
358	0.849098	0	1.16737	0	1.00824	0
359	1.61958	0	1.81592	0	1.71775	0
360	1.6982	0	1.73485	0	1.71652	0
361	1.16358	0	1.32951	0	1.24654	0
362	1.72964	0	2.02669	0	1.87817	0
363	0.550342	0	0.453979	0	0.50216	0
364	1.41516	0	1.47543	0	1.4453	0
365	2.73598	0	3.113	0	2.92449	0
366	0.15724	0	0.243203	0	0.200222	0
367	0.298757	0	0.486406	0	0.392581	0
368	0.58179	0	0.470193	0	0.525991	0
369	0.267309	0	0.194562	0	0.230936	0
370	0.0471721	0	0.0972812	0	0.0722267	0
371	1.05351	0	1.62135	0	1.33743	0
372	0.408825	0	0.453979	0	0.431402	0
373	1.00634	0	1.16737	0	1.08686	0
374	1.21075	0	1.10252	0	1.15664	0
375	0.377377	0	0.437766	0	0.407571	0
376	0.613238	0	0.810677	0	0.711957	0
377	0.644686	-0.015724	0.632328	0	0.638507	-0.00786202
378	0.15724	0	0.113495	0	0.135368	0
379	0.534617	0	0.924172	0	0.729395	0
380	1.60385	0	1.41058	0	1.50722	0
381	0.833374	0	1.10252	0	0.967947	0
382	0.314481	0	0.356698	0	0.335589	0
383	0.66041	-0.015724	1.07009	0	0.865252	-0.00786202
384	0.377377	0	0.372911	0	0.375144	0
385	1.91833	0	2.22125	0	2.06979	0
386	0.566066	0	0.583687	-0.0324271	0.574876	-0.0162135
387	1.44661	0	1.86456	0	1.65558	0
388	0.235861	0	0.356698	0	0.296279	0
389	0.597514	0	0.55126	0	0.574387	0
390	0.487445	0	0.794463	0	0.640954	0
391	0.204413	0	0.22699	0	0.215701	0
392	0.613238	0	0.583687	0	0.598463	0
393	2.05985	0	3.06436	0	2.5621	0
394	0.220137	0	0.243203	0	0.23167	0
395	0.283033	0	0.405338	0	0.344186	0
396	0.424549	0	0.664755	-0.0324271	0.544652	-0.0162135
397	0.550342	0	0.875531	0	0.712936	0
398	1.52523	0	1.81592	0	1.67057	0
399	1.80827	-0.015724	3.24271	0	2.52549	-0.00786202
400	1.61958	0	1.97805	0	1.79881	0
401	0.566066	0	1.36194	0	0.964001	0
402	0.566066	0	0.940385	0	0.753225	0
403	0.251585	0	0.178349	0	0.214967	0
404	0.188689	0	0.210776	0	0.199732	0
405	1.21075	0	1.86456	0	1.53765	0
406	0.0628962	0	0.0324271	0	0.0476616	0
407	0.314481	0	0.340484	0	0.327483	0
408	0.283033	0	0.340484	0	0.311759	0
409	0.345929	0	0.762036	0	0.553983	0
410	0.550342	0	0.486406	0	0.518374	0
411	2.68881	-0.015724	3.22649	0	2.95765	-0.00786202
412	2.35861	0	4.13445	0	3.24653	0
413	2.46867	0	2.93465	0	2.70166	0
414	1.55668	0	2.09155	0	1.82411	0
415	1.35227	0	1.60514	0	1.4787	0
416	1.10068	0	1.45922	0	1.27995	0
417	0.283033	0	0.291844	0	0.287438	0
418	0.015724	0	0.0810677	0	0.0483959	0
419	0.628962	0	0.891745	0	0.760353	0
420	0.487445	0	0.599901	0	0.543673	0
421	0.550342	0	0.762036	0	0.656189	0
422	0.849098	0	1.57271	0	1.21091	0
423	1.02206	0	1.24844	0	1.13525	0
424	0.188689	0	0.340484	0	0.264586	0
425	0.0628962	0	0.194562	0	0.128729	0
426	2.92467	0	3.50212	0	3.2134	0
427	0.393101	0	0.535047	0	0.464074	0
428	1.5724	0	1.9132	0	1.7428	0
429	0.110068	0	0.0810677	0	0.095568	0
430	2.50012	0	3.55076	0	3.02544	0
431	0.455997	0	0.875531	0	0.665764	0
432	2.20137	0	2.41582	0	2.30859	0
433	1.74537	0	2.57795	0	2.16166	0
434	1.52523	0	1.76728	0	1.64625	0
435	0.644686	0	0.664755	0	0.65472	0
436	0.707582	0	1.10252	0	0.905051	0
437	1.21075	0	1.68621	0	1.44848	0
438	1.41516	0	2.44824	0	1.9317	0
439	0.613238	0	0.729609	0	0.671423	0
440	0.283033	0	0.210776	0	0.246904	0
441	2.45295	0	2.69145	-0.0162135	2.5722	-0.00810677
442	2.90895	0	3.37242	0	3.14068	0
443	1.08496	0	1.9132	0	1.49908	0
444	2.04413	0	2.85358	0	2.44885	0
445	0.172964	0	0.22699	0	0.199977	0
446	0.644686	0	0.745823	0	0.695254	0
447	0.188689	0	0.340484	0	0.264586	0
448	1.3051	0	1.76728	0	1.53619	0
449	1.05351	0	2.04291	0	1.54821	0
450	0.0471721	0	0.0648542	0	0.0560131	0
451	0.330205	0	0.713396	0	0.5218	0
452	1.16358	0	2.04291	0	1.60324	0
453	1.83971	0	2.30232	0	2.07102	0
454	0.361653	0	0.599901	0	0.480777	0
455	0.73903	0	1.10252	0	0.920775	0
456	5.06314	0	7.4258	0	6.24447	0
457	0.220137	0	0.162135	0	0.191136	0
458	3.60081	0	5.85309	0	4.72695	0
459	0.298757	-0.015724	0.405338	0	0.352048	-0.00786202
460	2.16992	0	2.5131	0	2.34151	0
461	0.691858	0	0.843104	0	0.767481	0
462	1.14786	0	1.47543	0	1.31164	0
463	0.911995	0	1.15116	0	1.03158	0
464	0.393101	0	0.729609	0	0.561355	0
465	0.188689	0	0.27563	0	0.232159	0
466	0.58179	0	0.55126	0	0.566525	0
467	0.15724	0	0.324271	0	0.240756	0
468	0.314481	0	0.340484	0	0.327483	0
469	1.72964	0	2.10776	0	1.9187	0
470	0.723306	0	1.05388	0	0.888593	0
471	1.36799	0	1.70242	-0.0162135	1.53521	-0.00810677
472	0.267309	0	0.405338	0	0.336324	0
473	1.1793	0	1.58893	0	1.38411	0
474	0.393101	0	0.616114	0	0.504608	0
475	0.864822	0	1.13495	0	0.999885	0
476	0.518893	0	0.956599	0	0.737746	0
477	0.408825	0	0.259417	0	0.334121	0
478	0.990615	0	1.07009	0	1.03035	0
479	0.455997	0	0.745823	0	0.60091	0
480	1.50951	0	1.97805	0	1.74378	0
481	0.707582	0	1.26466	0	0.986119	0
482	0.707582	0	0.745823	0	0.726702	0
483	1.08496	0	1.47543	0	1.2802	0
484	0.172964	0	0.405338	0	0.289151	0
485	1.21075	0	1.08631	0	1.14853	0
486	0.393101	0	0.680969	0	0.537035	0
487	0.345929	0	0.421552	0	0.38374	0
488	0.550342	0	0.648542	0	0.599442	0
489	0.330205	0	0.648542	0	0.489373	0
490	0.440273	0	0.745823	0	0.593048	0
491	1.27365	0	1.37815	0	1.3259	0
492	2.70454	0	4.05338	0	3.37896	0
493	1.43089	0	1.39436	0	1.41263	0
494	0.754754	0	1.13495	0	0.944851	0
495	1.52523	0	2.78873	0	2.15698	0
496	2.95612	-0.015724	4.99377	0	3.97494	-0.00786202
497	0.911995	0	1.13495	0	1.02347	0
498	1.21075	0	1.66999	0	1.44037	0
499	1.2422	0	1.86456	0	1.55338	0
500	0.455997	0	0.405338	0	0.430668	0
501	0.172964	0	0.50262	0	0.337792	0
502	0.550342	0	0.859318	0	0.70483	0
503	0.707582	0	0.794463	0	0.751023	0
504	0.849098	0	1.28087	0	1.06498	0
505	1.54096	0	2.22125	0	1.88111	0
506	0.613238	0	1.16737	0	0.890306	0
507	0.66041	0	0.859318	0	0.759864	0
508	0.110068	0	0.210776	0	0.160422	0
509	0.235861	0	0.372911	0	0.304386	0
510	1.25792	0	2.44824	0	1.85308	0
511	0.267309	0	0.599901	0	0.433605	0
512	1.76109	0	2.64281	0	2.20195	0
513	0.172964	0	0.129708	0	0.151336	0
514	0.314481	0	0.810677	0	0.562579	0
515	0.471721	0	0.745823	0	0.608772	0
516	1.08496	0	1.18359	0	1.13427	0
517	1.90261	0	3.40484	0	2.65373	0
518	0.204413	0	0.405338	0	0.304876	0
519	0.361653	0	0.713396	-0.0162135	0.537524	-0.00810677
520	0.204413	0	0.421552	0	0.312982	0
521	0.204413	0	0.194562	-0.0162135	0.199488	-0.00810677
522	1.55668	0	2.44824	0	2.00246	0
523	0.0786202	0	0.145922	0	0.112271	0
524	0.440273	0	0.794463	0	0.617368	0
525	0.0786202	0	0.356698	0	0.217659	0
526	2.90895	0	3.50212	0	3.20554	0
527	0.377377	0	0.583687	0	0.480532	0
528	0.204413	0	0.356698	0	0.280555	0
529	0.676134	0	0.843104	0	0.759619	0
530	0.613238	0	0.745823	0	0.67953	0
531	1.08496	0	1.16737	-0.0324271	1.12617	-0.0162135
532	0.66041	0	0.82689	0	0.74365	0
533	1.27365	0	2.05912	0	1.66638	0
534	2.16992	0	3.4697	0	2.81981	0
535	0.408825	0	0.55126	0	0.480043	0
536	0.66041	0	1.3133	0	0.986853	0
537	0.66041	0	0.843104	0	0.751757	0
538	0.440273	0	0.794463	0	0.617368	0
539	0.330205	0	0.308057	0	0.319131	0
540	2.57874	-0.015724	3.90746	0	3.2431	-0.00786202
541	0.613238	0	1.50786	0	1.06055	0
542	3.36495	0	4.83163	0	4.09829	0
543	0.267309	0	0.632328	0	0.449818	0
544	1.79254	0	2.78873	0	2.29063	0
545	0.691858	0	1.07009	0	0.880976	0
546	0.361653	0	0.389125	-0.0162135	0.375389	-0.00810677
547	0.110068	0	0.243203	0	0.176636	0
548	0.990615	0	1.23223	0	1.11142	0
549	1.41516	0	2.49688	0	1.95602	0
550	0.0943443	0	0.0972812	0	0.0958127	0
551	0.393101	0	0.632328	0	0.512715	0
552	0.959167	0	1.42679	0	1.19298	0
553	0.73903	0	1.52407	0	1.13155	0
554	0.393101	0	0.616114	0	0.504608	0
555	0.330205	0	0.421552	0	0.375878	0
556	0.015724	0	0.0486406	0	0.0321823	0
557	0.125792	0	0.243203	0	0.184498	0
558	0	0	0.0648542	0	0.0324271	0
559	0.267309	0	0.535047	0	0.401178	0
560	0.298757	0	0.648542	0	0.473649	0
561	0.58179	0	1.03767	0	0.809728	0
562	0.283033	0	0.599901	0	0.441467	0
563	0.110068	0	0.178349	0	0.144209	0
564	0.345929	0	0.470193	0	0.408061	0
565	1.21075	0	1.34572	0	1.27824	0
566	7.10727	0	11.5278	0	9.31755	0
567	4.22977	-0.015724	7.0691	0	5.64944	-0.00786202
568	1.08496	0	1.57271	0	1.32884	0
569	0.267309	0	0.50262	0	0.384964	0
570	1.1793	-0.015724	2.25368	0	1.71649	-0.00786202
571	1.28937	0	2.56174	0	1.92556	0
572	0.770478	0	1.1998	0	0.98514	0
573	0.911995	0	1.39436	0	1.15318	0
574	0.235861	0	0.27563	0	0.255745	0
575	0.235861	0	0.340484	0	0.288172	0
576	0.345929	0	0.616114	0	0.481022	0
577	0.0471721	0	0.0810677	0	0.0641199	0
578	0.330205	0	0.535047	0	0.432626	0
579	0.455997	0	0.82689	0	0.641444	0
580	1.1793	0	1.47543	0	1.32737	0
581	0.974891	0	1.32951	0	1.1522	0
582	1.00634	0	1.97805	0	1.4922	0
583	0.204413	0	0.583687	0	0.39405	0
584	3.49074	0	4.94513	0	4.21793	0
585	2.0913	0	3.17785	0	2.63458	0
586	0.0471721	0	0.129708	0	0.0884402	0
587	1.6353	0	2.14019	0	1.88774	0
588	2.50012	0	4.26416	0	3.38214	0
589	1.72964	0	1.76728	-0.0324271	1.74846	-0.0162135
590	0.943443	0	1.13495	0	1.0392	0
591	1.61958	0	2.56174	0	2.09066	0
592	0.58179	0	0.907958	0	0.744874	0
593	1.25792	-0.015724	2.31854	0	1.78823	-0.00786202
594	0.220137	0	0.453979	0	0.337058	0
595	0.0943443	0	0.0810677	0	0.087706	0
596	0.345929	0	0.567474	0	0.456701	0
597	0.613238	0	0.762036	0	0.687637	0
598	2.32716	-0.015724	3.58319	0	2.95518	-0.00786202
599	0.440273	0	0.729609	0	0.584941	0
600	2.59447	0	4.18309	0	3.38878	0
601	1.6982	0	2.78873	0	2.24346	0
602	0.534617	0	1.07009	0	0.802355	0
603	2.07557	0	2.8698	0	2.47268	0
604	0.471721	0	0.616114	0	0.543918	0
605	1.3051	-0.015724	1.9132	0	1.60915	-0.00786202
606	0.959167	0	2.14019	0	1.54968	0
607	1.82399	0	2.83737	0	2.33068	0
608	0.534617	0	0.891745	0	0.713181	0
609	0.73903	0	1.10252	0	0.920775	0
610	0.141516	0	0.22699	0	0.184253	0
611	0.0786202	0	0.145922	0	0.112271	0
612	0.267309	0	0.324271	0	0.29579	0
613	0.0786202	0	0.178349	0	0.128485	0
614	0.125792	0	0.308057	0	0.216925	0
615	0.770478	-0.0314481	1.29708	-0.0162135	1.03378	-0.0238308
616	0.0943443	0	0.243203	0	0.168774	0
617	0.471721	0	0.940385	0	0.706053	0
618	0.235861	0	0.453979	0	0.34492	0
619	1.11641	0	1.49165	0	1.30403	0
620	0.424549	0	0.372911	0	0.39873	0
621	1.55668	0	2.54553	0	2.0511	0
622	1.27365	0	1.73485	-0.0162135	1.50425	-0.00810677
623	1.08496	-0.015724	1.9132	0	1.49908	-0.00786202
624	0.566066	0	0.810677	0	0.688371	0
625	0.707582	0	0.82689	-0.0324271	0.767236	-0.0162135
626	4.59142	-0.015724	8.41483	-0.0324271	6.50312	-0.0240756
627	1.33654	-0.015724	2.28611	0	1.81133	-0.00786202
628	1.03779	0	1.26466	0	1.15122	0
629	0.89627	-0.015724	1.66999	0	1.28313	-0.00786202
630	0.204413	0	0.0972812	0	0.150847	0
631	1.19503	0	1.63757	-0.0324271	1.4163	-0.0162135
632	0.15724	0	0.291844	0	0.224542	0
633	2.24854	0	4.16688	-0.0162135	3.20771	-0.00810677
634	2.27999	-0.015724	3.61562	0	2.9478	-0.00786202
635	0.81765	0	1.10252	0	0.960085	0
636	4.1826	0	6.56648	-0.0648542	5.37454	-0.0324271
637	2.64164	0	3.50212	-0.0162135	3.07188	-0.00810677
638	3.52219	-0.015724	6.67998	0	5.10108	-0.00786202
639	0.943443	-0.015724	1.26466	0	1.10405	-0.00786202
640	0.408825	-0.015724	0.762036	0	0.585431	-0.00786202
641	0.471721	0	1.08631	0	0.779014	0
642	0.204413	0	0.437766	0	0.321089	0
643	0.393101	0	0.421552	0	0.407327	0
644	0.408825	0	0.82689	0	0.617858	0
645	0.267309	0	0.664755	0	0.466032	0
646	0.927719	-0.015724	1.00524	0	0.966479	-0.00786202
647	1.6982	-0.0314481	3.55076	0	2.62448	-0.015724
648	1.35227	0	1.94562	0	1.64895	0
649	1.46234	0	2.44824	0	1.95529	0
650	3.16053	0	6.06386	-0.0162135	4.6122	-0.00810677
651	1.88689	0	4.19931	0	3.0431	0
652	4.62287	-0.015724	6.77726	0	5.70006	-0.00786202
653	0.566066	0	1.08631	0	0.826186	0
654	0.283033	0	0.875531	0	0.579282	0
655	0.613238	0	1.05388	0	0.833559	0
656	0.440273	0	0.680969	0	0.560621	0
657	0.204413	0	0.437766	0	0.321089	0
658	0	0	0.0162135	0	0.00810677	0
659	0.110068	0	0.194562	0	0.152315	0
660	1.80827	0	2.49688	-0.0486406	2.15257	-0.0243203
661	0.550342	0	0.77825	-0.0324271	0.664296	-0.0162135
662	0.754754	0	1.15116	0	0.952958	0
663	0.345929	0	0.50262	0	0.424274	0
664	2.68881	0	4.79921	0	3.74401	0
665	0.235861	0	0.405338	0	0.3206	0
666	4.02536	0	7.16638	-0.0162135	5.59587	-0.00810677
667	0.251585	0	0.243203	0	0.247394	0
668	0.628962	0	0.924172	0	0.776567	0
669	1.79254	0	3.4697	0	2.63112	0
670	0.172964	0	0.340484	0	0.256724	0
671	3.45929	0	4.94513	0	4.20221	0
672	2.5473	0	4.79921	0	3.67325	0
673	0.927719	0	1.54029	0	1.234	0
674	0.471721	0	0.77825	0	0.624986	0
675	0.66041	0	0.82689	0	0.74365	0
676	0.723306	0	0.632328	0	0.677817	0
677	0.440273	-0.015724	0.55126	0	0.495767	-0.00786202
678	0.440273	0	1.18359	0	0.811931	0
679	0.0786202	0	0.324271	0	0.201445	0
680	0.770478	0	1.05388	0	0.912179	0
681	0.220137	0	0.389125	0	0.304631	0
682	0.267309	0	0.535047	0	0.401178	0
683	0.927719	0	1.24844	0	1.08808	0
684	1.2422	0	1.81592	0	1.52906	0
685	1.00634	0	1.13495	0	1.07064	0
686	0.597514	0	0.989026	0	0.79327	0
687	0.613238	0	0.82689	0	0.720064	0
688	0.125792	0	0.129708	0	0.12775	0
689	0.974891	0	1.62135	0	1.29812	0
690	1.61958	0	2.28611	0	1.95284	0
691	1.00634	0	1.47543	0	1.24089	0
692	0.990615	0	1.08631	0	1.03846	0
693	4.40273	0	6.92318	0	5.66296	0
694	3.2706	0	5.31804	0	4.29432	0
695	2.40578	0	3.48591	0	2.94584	0
696	1.05351	0	1.443	0	1.24826	0
697	1.41516	0	1.92941	0	1.67229	0
698	0.455997	0	0.664755	0	0.560376	0
699	1.00634	0	1.41058	0	1.20846	0
700	1.11641	0	2.17261	0	1.64451	0
701	0.188689	0	0.194562	0	0.191625	0
702	0.550342	0	0.762036	0	0.656189	0
703	1.55668	0	3.30756	0	2.43212	0
704	0.393101	0	0.664755	0	0.528928	0
705	1.52523	0	1.76728	0	1.64625	0
706	1.55668	0	3.50212	0	2.5294	0
707	0.89627	0	1.58893	0	1.2426	0
708	0.251585	0	0.308057	0	0.279821	0
709	1.14786	0	1.97805	0	1.56295	0
710	4.38701	0	6.7124	0	5.54971	0
711	0.864822	0	1.28087	0	1.07285	0
712	0.597514	0	0.972812	0	0.785163	0
713	3.41212	0	5.30183	-0.0162135	4.35697	-0.00810677
714	0.0943443	0	0.129708	0	0.112026	0
715	0.298757	0	0.453979	0	0.376368	0
716	0.235861	0	0.405338	0	0.3206	0
717	0.0628962	0	0.0972812	0	0.0800887	0
718	0.0628962	0	0.0324271	0	0.0476616	0
719	0.0314481	0	0.113495	0	0.0724714	0
720	0.110068	0	0.0972812	0	0.103675	0
721	0.0786202	0	0.0486406	0	0.0636304	0
722	0.0628962	0	0.308057	0	0.185477	0
723	0.298757	0	0.162135	0	0.230446	0
724	0.927719	0	1.83213	0	1.37992	0
725	1.83971	-0.015724	2.44824	0	2.14398	-0.00786202
726	1.1793	0	1.86456	0	1.52193	0
727	0.707582	0	0.859318	0	0.78345	0
728	0.534617	0	0.535047	0	0.534832	0
729	1.93406	-0.015724	3.21028	0	2.57217	-0.00786202
730	0.911995	0	1.443	0	1.1775	0
731	0.220137	0	0.324271	0	0.272204	0
732	0.235861	0	0.405338	0	0.3206	0
733	0.298757	0	0.421552	0	0.360154	0
734	1.38372	-0.015724	2.30232	0	1.84302	-0.00786202
735	0.361653	0	0.421552	0	0.391602	0
736	0.550342	-0.015724	1.10252	-0.0324271	0.826431	-0.0240756
737	0.283033	0	0.259417	0	0.271225	0
738	0.613238	0	0.956599	0	0.784918	0
739	1.02206	0	1.28087	0	1.15147	0
740	1.39944	0	1.58893	0	1.49418	0
741	1.65102	0	3.09679	0	2.37391	0
742	2.31143	0	3.45348	-0.0162135	2.88246	-0.00810677
743	3.85239	-0.015724	6.45299	0	5.15269	-0.00786202
744	0.911995	0	1.13495	0	1.02347	0
745	4.89018	-0.015724	6.48542	0	5.6878	-0.00786202
746	1.54096	0	3.27513	0	2.40805	0
747	0.81765	0	1.02145	0	0.919552	0
748	2.4215	0	3.85882	0	3.14016	0
749	0.283033	0	0.194562	0	0.238798	0
750	0.408825	0	0.567474	0	0.488149	0
751	0.251585	0	0.356698	0	0.304141	0
752	0.408825	0	0.50262	0	0.455722	0
753	1.32082	0	2.28611	0	1.80346	0
754	1.25792	0	1.16737	0	1.21265	0
755	3.69515	0	4.21552	0	3.95534	0
756	0.66041	0	1.08631	0	0.873358	0
757	2.27999	0	3.93989	0	3.10994	0
758	0.550342	0	0.648542	0	0.599442	0
759	0.487445	0	0.972812	0	0.730129	0
760	1.13213	0	1.7997	0	1.46592	0
761	0.471721	0	0.729609	0	0.600665	0
762	0.424549	0	0.616114	0	0.520332	0
763	0.110068	0	0.308057	0	0.209063	0
764	0.110068	0	0.259417	0	0.184742	0
765	0.786202	0	1.15116	0	0.968682	0
766	0.204413	0	0.324271	0	0.264342	0
767	1.35227	0	2.33475	0	1.84351	0
768	3.96246	0	5.8693	-0.0162135	4.91588	-0.00810677
769	0.723306	0	1.16737	0	0.94534	0
770	1.77682	0	2.64281	0	2.20981	0
771	1.85544	0	2.52931	0	2.19237	0
772	1.43089	0	1.83213	-0.0162135	1.63151	-0.00810677
773	0.361653	0	0.697182	0	0.529418	0
774	1.68247	0	3.29135	0	2.48691	0
775	0.15724	0	0.55126	0	0.35425	0
776	0.361653	0	0.583687	0	0.47267	0
777	0.0628962	0	0.27563	0	0.169263	0
778	0.0471721	0	0.0324271	0	0.0397996	0
779	2.39005	0	3.84261	0	3.11633	0
780	0.424549	0	0.924172	0	0.67436	0
781	0.73903	0	1.65378	0	1.19641	0
782	0.89627	0	1.15116	0	1.02372	0
783	0.0628962	0	0.210776	0	0.136836	0
784	0.188689	0	0.243203	0	0.215946	0
785	0.440273	0	0.437766	0	0.439019	0
786	1.5724	0	2.14019	-0.0162135	1.8563	-0.00810677
787	0.220137	0	0.27563	0	0.247883	0
788	3.60081	0	5.91794	0	4.75937	0
789	1.49378	0	2.41582	0	1.9548	0
790	0.424549	0	0.632328	0	0.528439	0
791	1.61958	0	2.59417	0	2.10687	0
792	2.9404	0	4.23173	0	3.58606	0
793	0.849098	0	0.924172	0	0.886635	0
794	1.27365	0	1.60514	0	1.43939	0
795	2.65736	-0.015724	3.4697	0	3.06353	-0.00786202
796	5.66066	0	11.5603	0	8.61045	0
797	0.15724	0	0.259417	0	0.208329	0
798	0.125792	0	0.243203	0	0.184498	0
799	1.06923	0	1.37815	0	1.22369	0
800	0.283033	0	0.437766	0	0.360399	0
801	0.990615	0	2.02669	0	1.50865	0
802	1.21075	0	1.70242	0	1.45659	0
803	0.141516	0	0.259417	0	0.200466	0
804	0.283033	0	0.518833	0	0.400933	0
805	0.283033	0	0.697182	0	0.490107	0
806	3.94673	0	5.99901	0	4.97287	0
807	2.04413	0	3.37242	0	2.70827	0
808	7.57899	-0.015724	10.9117	-0.0162135	9.24535	-0.0159688
809	0.73903	0	1.1998	0	0.969416	0
810	0.0943443	0	0.145922	0	0.120133	0
811	0.251585	0	0.308057	0	0.279821	0
812	1.32082	0	2.5131	0	1.91696	0
813	0.283033	0	0.308057	0	0.295545	0
814	0.188689	0	0.210776	0	0.199732	0
815	0.314481	0	0.389125	0	0.351803	0
816	0.188689	0	0.421552	0	0.30512	0
817	0.644686	0	0.82689	0	0.735788	0
818	0.235861	0	0.421552	0	0.328706	0
819	0.267309	0	0.616114	0	0.441712	0
820	0.487445	0	0.713396	0	0.600421	0
821	0.440273	0	1.00524	0	0.722756	0
822	0.566066	0	0.82689	0	0.696478	0
823	0.251585	-0.015724	0.308057	-0.0324271	0.279821	-0.0240756
824	7.62616	0	13.7815	-0.0486406	10.7038	-0.0243203
825	0.833374	-0.0628962	1.3133	0	1.07334	-0.0314481
826	0.251585	0	0.340484	0	0.296034	0
827	0.298757	0	0.291844	0	0.2953	0
828	0.455997	0	0.972812	0	0.714405	0
829	0.723306	0	0.859318	-0.0162135	0.791312	-0.00810677
830	2.78316	0	3.77775	0	3.28046	0
831	1.32082	-0.0314481	1.71864	0	1.51973	-0.015724
832	0.786202	0	1.32951	0	1.05786	0
833	0.220137	0	0.437766	0	0.328951	0
834	0.188689	0	0.340484	0	0.264586	0
835	0.283033	0	0.389125	0	0.336079	0
836	0.0786202	0	0.0648542	0	0.0717372	0
837	0.534617	0	1.05388	0	0.794249	0
838	0.235861	0	0.453979	0	0.34492	0
839	0.235861	0	0.453979	0	0.34492	0
840	0.0943443	0	0.129708	0	0.112026	0
841	0.0786202	0	0.0972812	0	0.0879507	0
842	0.251585	0	0.356698	-0.0162135	0.304141	-0.00810677
843	0.251585	0	0.470193	0	0.360889	0
844	3.31777	-0.0314481	3.89125	0	3.60451	-0.015724
845	0.440273	0	0.324271	0	0.382272	0
846	0.911995	0	1.52407	0	1.21803	0
847	0.676134	0	1.18359	-0.0324271	0.929861	-0.0162135
848	1.06923	0	1.28087	0	1.17505	0
849	0.754754	0	1.29708	0	1.02592	0
850	0.345929	0	0.518833	0	0.432381	0
851	1.10068	0	1.83213	0	1.46641	0
852	0.204413	0	0.210776	0	0.207594	0
853	0.801926	0	1.13495	0	0.968437	0
854	0.0943443	0	0.22699	0	0.160667	0
855	0.330205	0	0.599901	0	0.465053	0
856	0.455997	0	0.616114	0	0.536056	0
857	0.172964	0	0.405338	0	0.289151	0
858	0.15724	0	0.178349	0	0.167795	0
859	0.235861	0	0.27563	0	0.255745	0
860	0.408825	0	0.82689	0	0.617858	0
861	1.00634	0	1.10252	0	1.05443	0
862	0.0786202	0	0.0648542	0	0.0717372	0
863	1.11641	0	1.70242	0	1.40941	0
864	1.14786	0	1.96184	0	1.55485	0
865	0.283033	0	0.27563	0	0.279331	0
866	3.28633	0	5.00998	0	4.14815	0
867	1.00634	0	2.1564	0	1.58137	0
868	0.471721	0	0.972812	0	0.722267	0
869	1.00634	-0.015724	1.71864	0	1.36249	-0.00786202
870	1.6982	-0.015724	3.17785	0	2.43803	-0.00786202
871	0.188689	0	0.324271	0	0.25648	0
872	0.298757	0	0.308057	0	0.303407	0
873	0.172964	0	0.308057	0	0.240511	0
874	1.00634	-0.0314481	1.49165	0	1.24899	-0.015724
875	0.393101	0	0.437766	0	0.415433	0
876	0.676134	0	0.956599	0	0.816366	0
877	1.93406	0	2.98329	0	2.45867	0
878	0.330205	0	0.535047	0	0.432626	0
879	0.471721	0	0.77825	0	0.624986	0
880	0.314481	0	0.389125	0	0.351803	0
881	2.20137	0	3.98853	0	3.09495	0
882	0.314481	0	0.518833	0	0.416657	0
883	1.05351	-0.0314481	2.17261	0	1.61306	-0.015724
884	5.73928	0	10.6847	0	8.212	0
885	0.125792	0	0.324271	0	0.225032	0
886	0.0786202	0	0.243203	0	0.160912	0
887	2.40578	0	3.42106	0	2.91342	0
888	0.172964	0	0.340484	0	0.256724	0
889	0.110068	0	0.291844	0	0.200956	0
890	0.015724	0	0.0486406	0	0.0321823	0
891	0.471721	0	1.11873	0	0.795228	0
892	0.0786202	0	0.405338	0	0.241979	0
893	0.393101	0	0.891745	0	0.642423	0
894	0.566066	0	1.3133	0	0.939681	0
895	0.267309	0	0.713396	0	0.490352	0
896	0.644686	0	0.729609	-0.0162135	0.687147	-0.00810677
897	0.0471721	0	0.0810677	0	0.0641199	0
898	0.471721	0	0.372911	0	0.422316	0
899	0.393101	0	0.843104	0	0.618103	0
900	0.628962	0	1.3133	0	0.971129	0
901	1.85544	0	4.16688	0	3.01116	0
902	0.0628962	0	0.145922	0	0.104409	0
903	0.0471721	0	0.129708	0	0.0884402	0
904	0.015724	0	0.0486406	0	0.0321823	0
905	0.283033	0	0.243203	0	0.263118	0
906	0.015724	0	0.0162135	0	0.0159688	0
907	0.220137	0	0.599901	0	0.410019	0
908	1.06923	0	1.47543	0	1.27233	0
909	0.0314481	0	0.113495	0	0.0724714	0
910	0.0628962	0	0.178349	0	0.120623	0
911	0.125792	0	0.340484	0	0.233138	0
912	0.251585	0	0.405338	0	0.328462	0
913	0.251585	0	0.372911	0	0.312248	0
914	0.188689	0	0.210776	-0.0162135	0.199732	-0.00810677
915	0.0786202	0	0.22699	0	0.152805	0
916	0.0471721	0	0.210776	0	0.128974	0
917	0.235861	-0.015724	0.405338	0	0.3206	-0.00786202
918	0.377377	0	0.518833	0	0.448105	0
919	0.110068	0	0.113495	0	0.111782	0
920	0.503169	0	0.762036	0	0.632603	0
921	0.408825	0	0.389125	-0.0162135	0.398975	-0.00810677
922	0.66041	0	1.07009	0	0.865252	0
923	0.628962	0	1.00524	0	0.817101	0
924	3.25488	0	4.556	0	3.90544	0
925	0.58179	0	0.745823	0	0.663806	0
926	0.424549	-0.0314481	0.77825	0	0.601399	-0.015724
927	0.393101	0	0.632328	0	0.512715	0
928	0.0628962	0	0.194562	0	0.128729	0
929	0.864822	0	1.15116	0	1.00799	0
930	1.60385	-0.015724	2.57795	0	2.0909	-0.00786202
931	0.691858	0	1.70242	0	1.19714	0
932	0.377377	-0.015724	0.632328	0	0.504853	-0.00786202
933	0.015724	0	0.0486406	0	0.0321823	0
934	3.2706	0	4.47494	-0.0162135	3.87277	-0.00810677
935	0.345929	0	0.55126	0	0.448595	0
936	0.361653	0	0.680969	0	0.521311	0
937	0.125792	0	0.243203	0	0.184498	0
938	0.487445	0	0.664755	0	0.5761	0
939	0.314481	0	0.324271	0	0.319376	0
940	0.534617	0	1.02145	0	0.778035	0
941	0.676134	0	0.745823	0	0.710978	0
942	0.15724	0	0.389125	0	0.273183	0
943	0.723306	0	1.60514	0	1.16422	0
944	0.377377	0	0.55126	0	0.464319	0
945	5.86507	0	9.84162	0	7.85334	0
946	3.63225	-0.015724	5.12348	0	4.37787	-0.00786202
947	9.16712	-0.015724	17.0729	0	13.12	-0.00786202
948	0.487445	0	0.745823	0	0.616634	0
949	0.015724	0	0.0810677	0	0.0483959	0
950	0.0943443	0	0.324271	0	0.209308	0
951	0.0943443	0	0.113495	0	0.10392	0
952	0.0471721	0	0.0648542	-0.0162135	0.0560131	-0.00810677
953	0.0628962	0	0.0972812	0	0.0800887	0
954	0.235861	0	0.324271	0	0.280066	0
955	0.0628962	0	0.0324271	0	0.0476616	0
956	0.283033	0	0.27563	0	0.279331	0
957	0.251585	0	0.648542	0	0.450063	0
958	0.110068	0	0.340484	0	0.225276	0
959	0.408825	0	0.697182	0	0.553004	0
960	0.330205	0	0.77825	0	0.554227	0
961	0.0471721	0	0	0	0.0235861	0
962	0.0943443	0	0.129708	0	0.112026	0
963	0.0628962	0	0.0324271	0	0.0476616	0
964	0.440273	0	0.648542	0	0.544407	0
965	0.0314481	0	0.0486406	0	0.0400444	0
966	0	0	0.0324271	0	0.0162135	0
967	0.172964	0	0.162135	0	0.16755	0
968	0	0	0.0324271	0	0.0162135	0
969	0.0314481	0	0.0648542	0	0.0481511	0
970	0.015724	0	0	0	0.00786202	0
971	0.015724	0	0.0648542	0	0.0402891	0
972	0.015724	0	0.0162135	0	0.0159688	0
973	0.015724	0	0.0162135	0	0.0159688	0
974	0.015724	0	0.0486406	0	0.0321823	0
975	0	0	0.0810677	0	0.0405338	0
976	0	0	0	0	0	0
977	0	0	0	0	0	0
978	0	0	0	0	0	0
979	0	0	0	0	0	0
980	0	0	0.0162135	0	0.00810677	0
981	0	0	0	0	0	0
982	0	0	0	0	0	0
983	0	0	0.0162135	0	0.00810677	0
984	0	0	0.0162135	0	0.00810677	0
985	0	0	0	0	0	0
986	0	0	0.0162135	0	0.00810677	0
987	0.015724	0	0	0	0.00786202	0
988	0.015724	0	0	0	0.00786202	0
989	0.015724	0	0	0	0.00786202	0
990	0	0	0	0	0	0
991	0	0	0.0162135	0	0.00810677	0
992	0	0	0	0	0	0
993	0	0	0.0162135	0	0.00810677	0
994	0.0314481	0	0.0486406	0	0.0400444	0
995	0	0	0.0486406	0	0.0243203	0
996	0	0	0	0	0	0
997	0	0	0	0	0	0
998	0	0	0.0162135	0	0.00810677	0
999	0	0	0	0	0	0
1000	0	0	0.0162135	0	0.00810677	0
1001	0.015724	0	0.0486406	0	0.0321823	0
1002	0.0314481	0	0	0	0.015724	0
1003	0	0	0	0	0	0
1004	0	0	0	0	0	0
1005	0	0	0	0	0	0
1006	0	0	0	-0.0162135	0	-0.00810677
1007	0	0	0	0	0	0
1008	0	0	0.0324271	0	0.0162135	0
1009	0	0	0	0	0	0
1010	0	0	0	0	0	0
1011	0	0	0	0	0	0
1012	0.015724	0	0	0	0.00786202	0
1013	0	0	0	0	0	0
1014	0	0	0	0	0	0
1015	0	0	0	0	0	0
1016	0	0	0	0	0	0
1017	0	0	0	0	0	0
1018	0	0	0	0	0	0
1019	0	0	0	0	0	0
1020	0	0	0	0	0	0
1021	0	0	0	0	0	0
1022	0	0	0	0	0	0
1023	0	0	0.0162135	0	0.00810677	0
1024	0	0	0	0	0	0
1025	0	0	0	0	0	0
1026	0	0	0	0	0	0
1027	0	0	0	0	0	0
1028	0	0	0.0162135	0	0.00810677	0
1029	0	0	0	0	0	0
1030	0	0	0	0	0	0
1031	0	0	0	0	0	0
1032	0	0	0	0	0	0
1033	0	0	0	0	0	0
1034	0	0	0	-0.0162135	0	-0.00810677
1035	0	0	0	0	0	0
1036	0	0	0	0	0	0
1037	0	0	0	0	0	0
1038	0	0	0	0	0	0
1039	0	0	0	0	0	0
1040	0	0	0	0	0	0
1041	0	0	0	0	0	0
1042	0	0	0	0	0	0
1043	0	0	0	0	0	0
1044	0	0	0	0	0	0
1045	0	0	0.0486406	0	0.0243203	0
1046	0	0	0	0	0	0
1047	0.015724	0	0	-0.0162135	0.00786202	-0.00810677
1048	0	0	0	0	0	0
1049	0	0	0	0	0	0
1050	0	0	0	0	0	0
1051	0	0	0	0	0	0
1052	0	0	0	0	0	0
1053	0	0	0	0	0	0
1054	0	0	0.0162135	0	0.00810677	0
1055	0.015724	0	0.0162135	0	0.0159688	0
1056	0	0	0	0	0	0
1057	0	0	0	0	0	0
1058	0	0	0	0	0	0
1059	0	0	0	0	0	0
1060	0	0	0	0	0	0
1061	0	0	0	0	0	0
1062	0	0	0	-0.0162135	0	-0.00810677
1063	0	0	0	0	0	0
1064	0	0	0	0	0	0
1065	0	0	0	0	0	0
1066	0	0	0	0	0	0
1067	0	0	0	0	0	0
1068	0	0	0	0	0	0
1069	0	0	0	0	0	0
1070	0	0	0	0	0	0
1071	0	0	0	0	0	0
1072	0	0	0	0	0	0
1073	0	0	0	0	0	0
1074	0	0	0	0	0	0
1075	0	0	0	0	0	0
1076	0	0	0	0	0	0
1077	0	0	0	0	0	0
1078	0	0	0	0	0	0
1079	0	0	0	0	0	0
1080	0	0	0	0	0	0
1081	0	0	0	0	0	0
1082	0	0	0	0	0	0
1083	0	0	0	0	0	0
1084	0	0	0	0	0	0
1085	0	-0.015724	0	0	0	-0.00786202
1086	0	0	0	0	0	0
1087	0	-0.0314481	0	0	0	-0.015724
1088	0	0	0	0	0	0
1089	0	0	0	-0.0486406	0	-0.0243203
1090	0	-0.015724	0	0	0	-0.00786202
1091	0.015724	0	0	0	0.00786202	0
1092	0	0	0	-0.0324271	0	-0.0162135
1093	0	0	0	0	0	0
1094	0	0	0	-0.0162135	0	-0.00810677
1095	0	-0.015724	0	0	0	-0.00786202
1096	0	-0.015724	0	-0.0486406	0	-0.0321823
1097	0	-0.110068	0	-0.22699	0	-0.168529
1098	0	-0.15724	0	-0.129708	0	-0.143474
1099	0	0	0	-0.0486406	0	-0.0243203
1100	0	-0.0943443	0.0162135	-0.0810677	0.00810677	-0.087706
1101	0	-0.172964	0	-0.259417	0	-0.216191
1102	0	0	0	0	0	0
1103	0	-0.0628962	0	-0.129708	0	-0.0963022
1104	0	-0.0314481	0	-0.0324271	0	-0.0319376
1105	0	-0.110068	0	-0.178349	0	-0.144209
1106	0	-0.015724	0	0	0	-0.00786202
1107	0	-0.518893	0	-0.535047	0	-0.52697
1108	0	0	0	0	0	0
1109	0	-0.0471721	0	-0.0162135	0	-0.0316928
1110	0	-0.0314481	0	-0.0648542	0	-0.0481511
1111	0	-0.0786202	0	-0.113495	0	-0.0960575
1112	0	-0.172964	0	-0.145922	0	-0.159443
1113	0	0	0	0	0	0
1114	0.015724	-0.0314481	0	0	0.00786202	-0.015724
1115	0	-0.0628962	0	0	0	-0.0314481
1116	0	0	0	0	0	0
1117	0	0	0	-0.0162135	0	-0.00810677
1118	0	-0.125792	0	-0.0972812	0	-0.111537
1119	0	-0.15724	0	-0.259417	0	-0.208329
1120	0	0	0	0	0	0
1121	0	-0.377377	0	-0.762036	0	-0.569707
1122	0	-0.0314481	0	-0.0486406	0	-0.0400444
1123	0	0	0	-0.113495	0	-0.0567474
1124	0	-0.0471721	0	-0.113495	0	-0.0803334
1125	0	0	0	-0.0162135	0	-0.00810677
1126	0	0	0	0	0	0
1127	0	0	0	0	0	0
1128	0	0	0	0	0	0
1129	0	-0.0314481	0	-0.0486406	0	-0.0400444
1130	0	0	0	0	0	0
1131	0	0	0	-0.0324271	0	-0.0162135
1132	0	0	0	0	0	0
1133	0	-0.0786202	0	-0.0162135	0	-0.0474169
1134	0	-0.0471721	0	0	0	-0.0235861
1135	0	-0.015724	0	-0.0810677	0	-0.0483959
1136	0	-0.0943443	0	-0.0810677	0	-0.087706
1137	0	-0.0471721	0	0	0	-0.0235861
1138	0	0	0	0	0	0
1139	0	0	0	-0.0324271	0	-0.0162135
1140	0	-0.0628962	0	0	0	-0.0314481
1141	0	0	0	0	0	0
1142	0	0	0	-0.0162135	0	-0.00810677
1143	0	-0.0943443	0	-0.0810677	0	-0.087706
1144	0	-0.0314481	0	-0.0486406	0	-0.0400444
1145	0	-0.0314481	0	-0.0972812	0	-0.0643647
1146	0	-0.0471721	0	-0.0486406	0	-0.0479064
1147	0	-0.0943443	0	-0.0324271	0	-0.0633857
1148	0	-0.015724	0	0	0	-0.00786202
1149	0	-0.0314481	0	0	0	-0.015724
1150	0	-0.110068	0	-0.0486406	0	-0.0793545
1151	0	-0.0471721	0	-0.0810677	0	-0.0641199
1152	0	0	0	-0.0162135	0	-0.00810677
1153	0	-0.0628962	0	-0.0648542	0	-0.0638752
1154	0	-0.0786202	0	-0.129708	0	-0.104164
1155	0	-0.833374	0.0162135	-1.21602	0.00810677	-1.02469
1156	0	-1.58813	0	-1.47543	0	-1.53178
1157	0	-0.314481	0	-0.243203	0	-0.278842
1158	0	-0.314481	0	-0.486406	0	-0.400444
1159	0	-0.235861	0	-0.129708	0	-0.182784
1160	0	-0.0314481	0	-0.145922	0	-0.088685
1161	0	-0.15724	0	-0.259417	0	-0.208329
1162	0	-0.0471721	0	-0.0162135	0	-0.0316928
1163	0	-0.0943443	0	-0.145922	0	-0.120133
1164	0	-0.0628962	0	-0.145922	0	-0.104409
1165	0	-0.015724	0	-0.145922	0	-0.0808229
1166	0	-0.0786202	0	-0.0162135	0	-0.0474169
1167	0	0	0	0	0	0
1168	0	-0.330205	0	-0.243203	0	-0.286704
1169	0	-0.0628962	0	-0.194562	0	-0.128729
1170	0	0	0	0	0	0
1171	0	-0.015724	0	-0.0486406	0	-0.0321823
1172	0	0	0	-0.0486406	0	-0.0243203
1173	0	-0.015724	0	0	0	-0.00786202
1174	0	-0.0314481	0	-0.0324271	0	-0.0319376
1175	0	-0.0314481	0	-0.0162135	0	-0.0238308
1176	0	0	0	0	0	0
1177	0	0	0	-0.0324271	0	-0.0162135
1178	0	0	0	0	0	0
1179	0	0	0	0	0	0
1180	0	-0.0314481	0	-0.0324271	0	-0.0319376
1181	0	-0.015724	0	-0.0162135	0	-0.0159688
1182	0	0	0	0	0	0
1183	0	0	0	-0.0324271	0	-0.0162135
1184	0	-0.015724	0	-0.0324271	0	-0.0240756
1185	0	-0.141516	0	-0.129708	0	-0.135612
1186	0	-0.0314481	0	-0.0324271	0	-0.0319376
1187	0	0	0	-0.0324271	0	-0.0162135
1188	0	-0.015724	0	-0.0324271	0	-0.0240756
1189	0	-0.015724	0	-0.0486406	0	-0.0321823
1190	0	-0.0628962	0	0	0	-0.0314481
1191	0	0	0	0	0	0
1192	0	-0.125792	0	-0.0486406	0	-0.0872165
1193	0	-0.0314481	0	-0.0324271	0	-0.0319376
1194	0	-0.0314481	0	0	0	-0.015724
1195	0	-0.0628962	0	0	0	-0.0314481
1196	0	-0.015724	0	-0.0324271	0	-0.0240756
1197	0	-0.0628962	0	-0.0648542	0	-0.0638752
1198	0	-0.235861	0	-0.194562	0	-0.215212
1199	0.015724	-0.298757	0	-0.27563	0.00786202	-0.287193
1200	0	-0.424549	0	-0.308057	0	-0.366303
1201	0	-0.015724	0	0	0	-0.00786202
1202	0	0	0	-0.0810677	0	-0.0405338
1203	0	0	0	0	0	0
1204	0	-0.0314481	0	-0.0648542	0	-0.0481511
1205	0	-0.0314481	0	-0.0162135	0	-0.0238308
1206	0	-0.0314481	0	-0.0810677	0	-0.0562579
1207	0	-0.0314481	0	-0.0162135	0	-0.0238308
1208	0	-0.015724	0	-0.0324271	0	-0.0240756
1209	0	-0.235861	0	-0.324271	0	-0.280066
1210	0	-0.0628962	0	-0.0810677	0	-0.0719819
1211	0	-0.298757	0	-0.356698	0	-0.327727
1212	0	-0.015724	0	0	0	-0.00786202
1213	0	-0.0628962	0	-0.0162135	0	-0.0395549
1214	0	-0.0786202	0	-0.0972812	0	-0.0879507
1215	0	0	0	-0.0162135	0	-0.00810677
1216	0	-0.015724	0	-0.0324271	0	-0.0240756
1217	0	-0.0471721	0	-0.0162135	0	-0.0316928
1218	0.015724	-0.0943443	0	-0.129708	0.00786202	-0.112026
1219	0	-0.0628962	0	-0.0810677	0	-0.0719819
1220	0	-0.141516	0	-0.162135	0	-0.151826
1221	0	-0.015724	0	0	0	-0.00786202
1222	0	-0.0471721	0	-0.0324271	0	-0.0397996
1223	0	-0.0471721	0	-0.0486406	0	-0.0479064
1224	0	-0.141516	0	-0.291844	0	-0.21668
1225	0	-0.330205	0	-0.356698	0	-0.343451
1226	0	-0.314481	0	-0.308057	0	-0.311269
1227	0	-0.377377	0	-0.599901	0	-0.488639
1228	0	-0.15724	0	-0.194562	0	-0.175901
1229	0	-0.361653	0	-0.437766	0	-0.399709
1230	0	-0.251585	0	-0.27563	0	-0.263607
1231	0.015724	-0.0471721	0	-0.129708	0.00786202	-0.0884402
1232	0	-0.0314481	0	-0.129708	0	-0.0805782
1233	0	-0.0471721	0	-0.0162135	0	-0.0316928
1234	0	-0.0314481	0	0	0	-0.015724
1235	0	0	0	-0.0486406	0	-0.0243203
1236	0	-0.015724	0	-0.0324271	0	-0.0240756
1237	0.015724	-0.89627	0	-0.82689	0.00786202	-0.86158
1238	0	-0.330205	0	-0.583687	0	-0.456946
1239	0	-0.864822	0	-0.924172	0	-0.894497
1240	0	-0.125792	0	-0.259417	0	-0.192604
1241	0	-0.251585	0	-0.324271	0	-0.287928
1242	0.015724	-1.3051	0	-1.62135	0.00786202	-1.46322
1243	0	-0.125792	0	-0.145922	0	-0.135857
1244	0	-0.283033	0	-0.291844	0	-0.287438
1245	0	-0.188689	0	-0.340484	0	-0.264586
1246	0	-0.220137	0	-0.178349	0	-0.199243
1247	0	-0.0786202	0.0162135	-0.145922	0.00810677	-0.112271
1248	0	-0.283033	0	-0.324271	0	-0.303652
1249	0.0314481	-0.314481	0	-0.55126	0.015724	-0.432871
1250	0	-1.16358	0	-1.42679	0	-1.29519
1251	0	-0.110068	0	-0.194562	0	-0.152315
1252	0	-0.267309	0	-0.372911	0	-0.32011
1253	0	-0.0471721	0	-0.0648542	0	-0.0560131
1254	0	0	0	-0.0324271	0	-0.0162135
1255	0	-0.125792	0	-0.27563	0	-0.200711
1256	0.015724	-0.015724	0	-0.0486406	0.00786202	-0.0321823
1257	0	-0.267309	0	-0.243203	0	-0.255256
1258	0	0	0	-0.0324271	0	-0.0162135
1259	0	-0.0786202	0	-0.0162135	0	-0.0474169
1260	0	-2.04413	0	-2.78873	0	-2.41643
1261	0	-0.204413	0	-0.113495	0	-0.158954
1262	0	-0.613238	0	-0.82689	0	-0.720064
1263	0	-0.408825	0	-0.632328	0	-0.520577
1264	0	-0.15724	0	-0.0648542	0	-0.111047
1265	0	-0.110068	0	-0.0648542	0	-0.0874612
1266	0	-0.141516	0	-0.145922	0	-0.143719
1267	0	0	0	0	0	0
1268	0	-0.864822	0	-1.08631	0	-0.975565
1269	0	-0.0628962	0	-0.129708	0	-0.0963022
1270	0	-0.0786202	0	-0.0486406	0	-0.0636304
1271	0	-0.0314481	0	-0.0648542	0	-0.0481511
1272	0	-0.015724	0	-0.0810677	0	-0.0483959
1273	0	-0.0471721	0	-0.0162135	0	-0.0316928
1274	0	-0.015724	0	-0.145922	0	-0.0808229
1275	0	-0.0786202	0	-0.0810677	0	-0.079844
1276	0	-0.110068	0.0162135	-0.0324271	0.00810677	-0.0712477
1277	0	-0.125792	0	-0.194562	0	-0.160177
1278	0	-0.0471721	0	-0.0648542	0	-0.0560131
1279	0	-0.125792	0	-0.178349	0	-0.152071
1280	0	-0.0628962	0	-0.0486406	0	-0.0557684
1281	0	-0.204413	0	-0.210776	0	-0.207594
1282	0	-0.0786202	0	-0.162135	0	-0.120378
1283	0	-0.628962	0	-0.599901	0	-0.614431
1284	0	-0.15724	0	-0.178349	0	-0.167795
1285	0	-0.15724	0	-0.178349	0	-0.167795
1286	0	-0.0628962	0	-0.0972812	0	-0.0800887
1287	0	-0.0628962	0	-0.113495	0	-0.0881955
1288	0	-0.0943443	0	-0.129708	0	-0.112026
1289	0	-0.110068	0	-0.0648542	0	-0.0874612
1290	0	-0.235861	0	-0.324271	0	-0.280066
1291	0	-0.015724	0	-0.0324271	0	-0.0240756
1292	0	-0.0314481	0	-0.0486406	0	-0.0400444
1293	0	-0.110068	0	-0.113495	0	-0.111782
1294	0	-0.172964	0	-0.259417	0	-0.216191
1295	0	-0.66041	0	-0.664755	0	-0.662582
1296	0	-0.361653	0	-0.616114	0	-0.488884
1297	0	-0.471721	0	-0.680969	0	-0.576345
1298	0	-0.550342	0	-0.82689	0	-0.688616
1299	0	-0.172964	0	-0.389125	0	-0.281045
1300	0	-0.172964	0	-0.194562	0	-0.183763
1301	0.015724	-0.0943443	0	-0.162135	0.00786202	-0.12824
1302	0	-0.015724	0	0	0	-0.00786202
1303	0	-0.0943443	0	-0.162135	0	-0.12824
1304	0	-0.125792	0	-0.291844	0	-0.208818
1305	0	-0.0471721	0	-0.0972812	0	-0.0722267
1306	0	-0.15724	0	-0.324271	0	-0.240756
1307	0	-0.314481	0	-0.567474	0	-0.440977
1308	0	-0.204413	0	-0.308057	0	-0.256235
1309	0	-0.0943443	0	-0.113495	0	-0.10392
1310	0	-0.707582	0	-1.11873	0	-0.913158
1311	0	-0.0786202	0	-0.0810677	0	-0.079844
1312	0	-0.015724	0	-0.0324271	0	-0.0240756
1313	0	-0.267309	0	-0.421552	0	-0.34443
1314	0	-0.015724	0	-0.0486406	0	-0.0321823
1315	0	-0.125792	0	-0.210776	0	-0.168284
1316	0	-0.15724	0	-0.162135	0	-0.159688
1317	0	-0.235861	0	-0.178349	0	-0.207105
1318	0	-0.172964	0	-0.389125	0	-0.281045
1319	0.015724	-2.21709	0.0162135	-4.08581	0.0159688	-3.15145
1320	0	0	0	-0.0162135	0	-0.00810677
1321	0	-0.204413	0	-0.27563	0	-0.240021
1322	0	-0.125792	0	-0.145922	0	-0.135857
1323	0	-0.0628962	0	-0.0324271	0	-0.0476616
1324	0	-0.15724	0	-0.194562	0	-0.175901
1325	0	-0.110068	0	-0.129708	0	-0.119888
1326	0	-0.141516	0	-0.259417	0	-0.200466
1327	0.015724	-0.424549	0.0486406	-0.389125	0.0321823	-0.406837
1328	0	-0.125792	0	-0.0324271	0	-0.0791097
1329	0	-0.0943443	0	-0.194562	0	-0.144453
1330	0	-0.518893	0	-0.664755	0	-0.591824
1331	0	-0.0786202	0	-0.437766	0	-0.258193
1332	0	-0.172964	0	-0.0972812	0	-0.135123
1333	0	-0.0314481	0	-0.0972812	0	-0.0643647
1334	0	-0.141516	0	-0.194562	0	-0.168039
1335	0.015724	-0.345929	0	-0.27563	0.00786202	-0.31078
1336	0	-0.204413	0	-0.259417	0	-0.231915
1337	0	-0.377377	0	-0.583687	0	-0.480532
1338	0	-0.141516	0	-0.145922	0	-0.143719
1339	0	-0.220137	0	-0.194562	0	-0.20735
1340	0	-0.172964	0	-0.27563	0	-0.224297
1341	0	-0.0471721	0	-0.113495	0	-0.0803334
1342	0	-0.125792	0	-0.113495	0	-0.119644
1343	0	-0.0471721	0	-0.0972812	0	-0.0722267
1344	0	-0.0628962	0	-0.0486406	0	-0.0557684
1345	0	-0.110068	0	-0.0810677	0	-0.095568
1346	0.015724	-1.44661	0	-2.3996	0.00786202	-1.92311
1347	0	-0.110068	0	-0.0486406	0	-0.0793545
1348	0	-0.487445	0	-0.437766	0	-0.462605
1349	0	-0.566066	0	-0.697182	0	-0.631624
1350	0	-0.015724	0	-0.0810677	0	-0.0483959
1351	0	-0.251585	0	-0.22699	0	-0.239287
1352	0	-2.10702	0	-2.35096	0	-2.22899
1353	0	-0.0628962	0	-0.0486406	0	-0.0557684
1354	0	-0.188689	0	-0.145922	0	-0.167305
1355	0.015724	-0.73903	0	-1.07009	0.00786202	-0.904562
1356	0	-0.220137	0	-0.405338	0	-0.312738
1357	0	-0.377377	0	-0.324271	0	-0.350824
1358	0	-0.251585	0	-0.308057	0	-0.279821
1359	0	-0.141516	0	-0.0810677	0	-0.111292
1360	0	-0.0471721	0	-0.0648542	0	-0.0560131
1361	0	-0.110068	0	-0.113495	0	-0.111782
1362	0	-0.235861	0	-0.194562	0	-0.215212
1363	0.015724	-0.487445	0	-1.11873	0.00786202	-0.80309
1364	0	-0.110068	0	-0.0648542	0	-0.0874612
1365	0	-0.220137	0	-0.22699	0	-0.223563
1366	0	-0.503169	0	-0.745823	0	-0.624496
1367	0	-0.566066	0	-0.389125	0	-0.477595
1368	0	-0.534617	0	-0.486406	0	-0.510512
1369	0	-0.455997	0	-0.421552	0	-0.438775
1370	0	-0.015724	0	-0.129708	0	-0.0727162
1371	0	-0.251585	0.0162135	-0.308057	0.00810677	-0.279821
1372	0	-0.235861	0	-0.22699	0	-0.231425
1373	0	-0.314481	0	-0.372911	0	-0.343696
1374	0	-0.314481	0	-0.243203	0	-0.278842
1375	0	-0.0471721	0	-0.129708	0	-0.0884402
1376	0	-0.172964	0	-0.243203	0	-0.208084
1377	0	-0.0786202	0	-0.113495	0	-0.0960575
1378	0.015724	-1.02206	0.0162135	-1.41058	0.0159688	-1.21632
1379	0.015724	-1.14786	0	-0.924172	0.00786202	-1.03601
1380	0	-0.0628962	0	-0.0486406	0	-0.0557684
1381	0	-0.393101	0	-0.340484	0	-0.366793
1382	0	-0.015724	0	-0.145922	0	-0.0808229
1383	0	-0.786202	0	-1.11873	0	-0.952468
1384	0	0	0	-0.0324271	0	-0.0162135
1385	0	0	0	-0.0648542	0	-0.0324271
1386	0	-0.172964	0	-0.291844	0	-0.232404
1387	0	-0.251585	0	-0.421552	0	-0.336568
1388	0	-0.251585	0	-0.308057	0	-0.279821
1389	0	-0.267309	0	-0.518833	0	-0.393071
1390	0	-0.0314481	0	-0.0486406	0	-0.0400444
1391	0	-0.0471721	0	-0.0972812	0	-0.0722267
1392	0	-0.15724	0	-0.437766	0	-0.297503
1393	0	-0.0471721	0	0	0	-0.0235861
1394	0	-0.188689	0	-0.308057	0	-0.248373
1395	0	-0.188689	0	-0.194562	0	-0.191625
1396	0	-0.0786202	0	-0.0324271	0	-0.0555236
1397	0	-0.0471721	0	-0.0324271	0	-0.0397996
1398	0	-0.0314481	0	-0.0162135	0	-0.0238308
1399	0	-0.377377	0.0162135	-0.453979	0.00810677	-0.415678
1400	0	-0.15724	0	-0.194562	0	-0.175901
1401	0	-0.361653	0	-0.291844	0	-0.326748
1402	0	0	0	-0.0162135	0	-0.00810677
1403	0	-0.0471721	0	0	0	-0.0235861
1404	0	-0.0943443	0	-0.0810677	0	-0.087706
1405	0	-0.377377	0	-0.470193	0	-0.423785
1406	0	-0.0628962	0	-0.129708	0	-0.0963022
1407	0	-0.0471721	0	-0.0324271	0	-0.0397996
1408	0	-0.125792	0	-0.0810677	0	-0.10343
1409	0	0	0	-0.0324271	0	-0.0162135
1410	0	-0.125792	0	-0.113495	0	-0.119644
1411	0	-0.754754	0	-1.57271	0	-1.16373
1412	0	-0.110068	0	-0.389125	0	-0.249597
1413	0	-0.141516	0	-0.129708	0	-0.135612
1414	0	-0.754754	0.0162135	-0.762036	0.00810677	-0.758395
1415	0	-0.408825	0	-0.680969	0	-0.544897
1416	0	-0.172964	0	-0.129708	0	-0.151336
1417	0	-0.220137	0	-0.162135	0	-0.191136
1418	0	-0.141516	0	-0.178349	0	-0.159933
1419	0	-0.15724	0	-0.0648542	0	-0.111047
1420	0	-0.015724	0	-0.0324271	0	-0.0240756
1421	0	-0.125792	0	-0.162135	0	-0.143964
1422	0	-0.0786202	0	-0.113495	0	-0.0960575
1423	0	-0.0314481	0	-0.0162135	0	-0.0238308
1424	0	-0.283033	0	-0.259417	0	-0.271225
1425	0	-0.911995	0	-0.940385	0	-0.92619
1426	0	-1.2422	0	-1.62135	0	-1.43178
1427	0	-2.15419	0	-2.82116	0	-2.48767
1428	0	-0.424549	0	-0.437766	0	-0.431157
1429	0	-0.0471721	0	-0.113495	0	-0.0803334
1430	0	-0.377377	0	-0.518833	0	-0.448105
1431	0	-0.455997	0	-0.470193	0	-0.463095
1432	0	-0.345929	0	-0.486406	0	-0.416168
1433	0	-0.314481	0	-0.259417	0	-0.286949
1434	0	-0.015724	0	-0.0972812	0	-0.0565026
1435	0	-0.393101	0	-0.291844	0	-0.342472
1436	0	-0.0471721	0	-0.0162135	0	-0.0316928
1437	0	-0.0628962	0	-0.0648542	0	-0.0638752
1438	0	-0.15724	0	-0.162135	0	-0.159688
1439	0	-0.125792	0	-0.259417	0	-0.192604
1440	0	-0.220137	0.0162135	-0.243203	0.00810677	-0.23167
1441	0	-0.377377	0	-0.680969	0	-0.529173
1442	0	0	0	0	0	0
1443	0	-0.110068	0	-0.194562	0	-0.152315
1444	0	-0.015724	0	-0.0648542	0	-0.0402891
1445	0	-0.298757	0	-0.340484	0	-0.319621
1446	0	-0.424549	0.0162135	-0.664755	0.00810677	-0.544652
1447	0	-0.141516	0	-0.324271	0	-0.232894
1448	0	-0.0628962	0	-0.0324271	0	-0.0476616
1449	0	-0.314481	0.0162135	-0.470193	0.00810677	-0.392337
1450	0	-0.0943443	0	-0.308057	0	-0.201201
1451	0	-0.0314481	0	-0.22699	0	-0.129219
1452	0	-0.15724	0	-0.291844	0	-0.224542
1453	0	-0.110068	0	-0.0972812	0	-0.103675
1454	0	-0.110068	0	-0.210776	0	-0.160422
1455	0	-0.393101	0	-0.713396	0	-0.553248
1456	0	-0.0786202	0	-0.324271	0	-0.201445
1457	0	-0.141516	0	-0.0486406	0	-0.0950785
1458	0	-0.141516	0	-0.437766	0	-0.289641
1459	0	-0.518893	0	-0.50262	0	-0.510757
1460	0	-0.81765	0	-1.03767	0	-0.927658
1461	0	-0.298757	0	-0.697182	0	-0.497969
1462	0	-0.283033	0	-0.291844	0	-0.287438
1463	0	-0.110068	0	-0.129708	0	-0.119888
1464	0	-0.911995	0	-0.924172	0	-0.918083
1465	0	-0.0628962	0	-0.194562	0	-0.128729
1466	0	-0.518893	0	-0.924172	0	-0.721533
1467	0	-0.330205	0	-0.794463	0	-0.562334
1468	0	-0.235861	0	-0.308057	0	-0.271959
1469	0	-0.298757	0	-0.664755	0	-0.481756
1470	0.015724	-0.125792	0	-0.356698	0.00786202	-0.241245
1471	0	-0.0943443	0	-0.0648542	0	-0.0795992
1472	0	-0.0628962	0	-0.0810677	0	-0.0719819
1473	0	-0.125792	0	-0.113495	0	-0.119644
1474	0	-0.188689	0	-0.27563	0	-0.232159
1475	0	-0.723306	0.0324271	-0.843104	0.0162135	-0.783205
1476	0	-0.0628962	0	-0.162135	0	-0.112516
1477	0	-0.0471721	0	-0.0648542	0	-0.0560131
1478	0	-0.141516	0	-0.27563	0	-0.208573
1479	0	-0.566066	0	-0.437766	0	-0.501916
1480	0	-0.345929	0	-0.27563	0	-0.31078
1481	0	-0.188689	0	-0.518833	0	-0.353761
1482	0	-1.03779	0	-1.50786	0	-1.27282
1483	0	-0.0628962	0	-0.194562	0	-0.128729
1484	0	-0.15724	0	-0.210776	0	-0.184008
1485	0	-0.251585	0	-0.453979	0	-0.352782
1486	0	-0.393101	0	-0.50262	0	-0.44786
1487	0	-0.361653	0	-0.405338	0	-0.383496
1488	0	-0.204413	0	-0.599901	0	-0.402157
1489	0	-0.015724	0	-0.0162135	0	-0.0159688
1490	0	-0.172964	0	-0.178349	0	-0.175657
1491	0	-0.0786202	0.0162135	-0.0972812	0.00810677	-0.0879507
1492	0	-0.251585	0	-0.291844	0	-0.271714
1493	0	-0.298757	0	-0.535047	0	-0.416902
1494	0	-0.235861	0	-0.372911	0	-0.304386
1495	0	-0.440273	0.0162135	-0.470193	0.00810677	-0.455233
1496	0	-0.345929	0	-0.453979	0	-0.399954
1497	0	-0.141516	0	-0.178349	0	-0.159933
1498	0	-0.172964	0	-0.194562	0	-0.183763
1499	0	-0.298757	0	-0.632328	0	-0.465542
1500	0	-0.220137	0	-0.178349	0	-0.199243
1501	0	-0.393101	0.0162135	-0.486406	0.00810677	-0.439754
1502	0	-0.424549	0	-0.82689	0	-0.62572
1503	0	-0.283033	0	-0.453979	0	-0.368506
1504	0	-0.0786202	0	-0.113495	0	-0.0960575
1505	0	-0.141516	0	-0.194562	0	-0.168039
1506	0	-0.015724	0	-0.0648542	0	-0.0402891
1507	0	-0.220137	0	-0.340484	0	-0.28031
1508	0	-0.0471721	0	-0.145922	0	-0.096547
1509	0	-0.408825	0	-0.50262	0	-0.455722
1510	0	-0.314481	0	-0.486406	0	-0.400444
1511	0	-0.0628962	0	-0.145922	0	-0.104409
1512	0	-0.283033	0	-0.405338	0	-0.344186
1513	0	-0.361653	0	-0.616114	0	-0.488884
1514	0	-0.0471721	0	-0.145922	0	-0.096547
1515	0	-0.0628962	0	-0.178349	0	-0.120623
1516	0	-0.0314481	0	-0.0486406	0	-0.0400444
1517	0	-0.0314481	0	-0.0972812	0	-0.0643647
1518	0	-0.125792	0	-0.259417	0	-0.192604
1519	0	-0.188689	0	-0.162135	0	-0.175412
1520	0	-0.172964	0	-0.194562	0	-0.183763
1521	0	-0.0471721	0	-0.113495	0	-0.0803334
1522	0	-0.0471721	0	-0.0324271	0	-0.0397996
1523	0	-0.15724	0	-0.0486406	0	-0.102941
1524	0.0471721	-0.314481	0	-0.648542	0.0235861	-0.481511
1525	0	-0.110068	0	-0.129708	0	-0.119888
1526	0	-0.330205	0	-0.356698	0	-0.343451
1527	0	-0.0943443	0	-0.145922	0	-0.120133
1528	0	-0.0314481	0	-0.113495	0	-0.0724714
1529	0	-0.283033	0	-0.291844	0	-0.287438
1530	0	-0.141516	0	-0.0648542	0	-0.103185
1531	0	-0.73903	0	-0.875531	0	-0.807281
1532	0	-0.0314481	0	-0.0648542	0	-0.0481511
1533	0	-0.566066	0	-0.535047	0	-0.550556
1534	0	-0.393101	0	-0.794463	0	-0.593782
1535	0	-0.0628962	0	-0.145922	0	-0.104409
1536	0	-0.172964	0	-0.162135	0	-0.16755
1537	0.015724	-0.235861	0	-0.22699	0.00786202	-0.231425
1538	0	-1.39944	0	-1.68621	0	-1.54282
1539	0	-0.345929	0	-0.583687	0	-0.464808
1540	0	-0.0471721	0	-0.0972812	0	-0.0722267
1541	0	-0.0943443	0	-0.145922	0	-0.120133
1542	0	-0.110068	0	-0.145922	0	-0.127995
1543	0.015724	-0.0786202	0	-0.129708	0.00786202	-0.104164
1544	0	-0.0943443	0	-0.0972812	0	-0.0958127
1545	0	-0.0471721	0	-0.0648542	0	-0.0560131
1546	0	-0.172964	0	-0.22699	0	-0.199977
1547	0	-0.408825	0	-0.794463	0	-0.601644
1548	0	-0.015724	0	0	0	-0.00786202
1549	0	-0.0628962	0	-0.0972812	0	-0.0800887
1550	0	-0.0471721	0	-0.0810677	0	-0.0641199
1551	0.015724	-0.0786202	0	0	0.00786202	-0.0393101
1552	0	-0.0314481	0	-0.0486406	0	-0.0400444
1553	0	-0.0314481	0	-0.0810677	0	-0.0562579
1554	0	-0.566066	0	-0.437766	0	-0.501916
1555	0	-0.0314481	0	-0.0324271	0	-0.0319376
1556	0	-0.15724	0	-0.162135	0	-0.159688
1557	0	-0.518893	0	-0.421552	0	-0.470223
1558	0	-0.172964	0.0162135	-0.535047	0.00810677	-0.354006
1559	0	-0.220137	0	-0.356698	0	-0.288417
1560	0	-0.015724	0	-0.0648542	0	-0.0402891
1561	0	-0.188689	0	-0.194562	0	-0.191625
1562	0	-0.0471721	0	-0.0648542	0	-0.0560131
1563	0.015724	-0.188689	0	-0.243203	0.00786202	-0.215946
1564	0	-0.015724	0	-0.0486406	0	-0.0321823
1565	0	-0.015724	0	-0.0162135	0	-0.0159688
1566	0.015724	-0.015724	0	-0.0486406	0.00786202	-0.0321823
1567	0	-0.0943443	0	-0.210776	0	-0.15256
1568	0	-0.235861	0	-0.405338	0	-0.3206
1569	0	-0.172964	0	-0.178349	0	-0.175657
1570	0	-0.188689	0	-0.22699	0	-0.207839
1571	0	-0.0786202	0	-0.243203	0	-0.160912
1572	0	-0.235861	0	-0.405338	0	-0.3206
1573	0	-0.125792	0	-0.0972812	0	-0.111537
1574	0	-0.283033	0	-0.82689	0	-0.554962
1575	0	-0.0943443	0	-0.194562	0	-0.144453
1576	0	-0.015724	0	0	0	-0.00786202
1577	0	-0.0314481	0	-0.0810677	0	-0.0562579
1578	0	-0.0628962	0	-0.0648542	0	-0.0638752
1579	0	-0.393101	0	-0.421552	0	-0.407327
1580	0	-0.220137	0	-0.162135	0	-0.191136
1581	0	-0.15724	0	-0.27563	0	-0.216435
1582	0	-0.0314481	0	-0.0324271	0	-0.0319376
1583	0	-0.0314481	0	-0.0648542	0	-0.0481511
1584	0	0	0	-0.0486406	0	-0.0243203
1585	0	-0.015724	0	0	0	-0.00786202
1586	0	-0.15724	0	-0.437766	0	-0.297503
1587	0	-0.0786202	0	-0.0162135	0	-0.0474169
1588	0	-0.15724	0	-0.145922	0	-0.151581
1589	0	-0.440273	0	-0.421552	0	-0.430913
1590	0	-0.172964	0.0162135	-0.178349	0.00810677	-0.175657
1591	0	-0.15724	0	-0.145922	0	-0.151581
1592	0	-0.141516	0	-0.162135	0	-0.151826
1593	0	-0.188689	0	-0.162135	0	-0.175412
1594	0	-0.0471721	0	-0.129708	0	-0.0884402
1595	0	-0.0314481	0.0162135	-0.0810677	0.00810677	-0.0562579
1596	0	-0.990615	0	-1.08631	0	-1.03846
1597	0	-0.0471721	0	-0.0648542	0	-0.0560131
1598	0	-0.267309	0	-0.470193	0	-0.368751
1599	0	-0.141516	0	-0.340484	0	-0.241
1600	0	-0.345929	0	-0.194562	0	-0.270246
1601	0	-0.0628962	0	-0.0648542	0	-0.0638752
1602	0	-0.220137	0	-0.243203	0	-0.23167
1603	0	-0.125792	0	-0.210776	0	-0.168284
1604	0	-0.0471721	0	-0.0324271	0	-0.0397996
1605	0.015724	0	0	0	0.00786202	0
1606	0	-0.0314481	0	-0.0324271	0	-0.0319376
1607	0	-0.0471721	0	-0.0972812	0	-0.0722267
1608	0	-0.141516	0	-0.324271	0	-0.232894
1609	0.0314481	-0.298757	0.0486406	-0.356698	0.0400444	-0.327727
1610	0	-0.0471721	0	-0.194562	0	-0.120867
1611	0	-0.0943443	0	-0.0810677	0	-0.087706
1612	0	-0.125792	0.0162135	-0.291844	0.00810677	-0.208818
1613	0	0	0	-0.0324271	0	-0.0162135
1614	0	-0.0943443	0	-0.0324271	0	-0.0633857
1615	0	-0.0314481	0	-0.0648542	0	-0.0481511
1616	0	-0.015724	0	-0.0162135	0	-0.0159688
1617	0	-0.0314481	0	-0.0648542	0	-0.0481511
1618	0	0	0	0	0	0
1619	0	-0.235861	0	-0.308057	0	-0.271959
1620	0	0	0	-0.0324271	0	-0.0162135
1621	0	-0.0471721	0	-0.0810677	0	-0.0641199
1622	0.015724	-0.377377	0	-0.535047	0.00786202	-0.456212
1623	0	-0.0471721	0	-0.113495	0	-0.0803334
1624	0	-0.0786202	0	-0.162135	0	-0.120378
1625	0	-0.015724	0	-0.0162135	0	-0.0159688
1626	0	-0.204413	0	-0.340484	0	-0.272448
1627	0	-0.0471721	0	-0.0486406	0	-0.0479064
1628	0	0	0	0	0	0
1629	0	-0.015724	0	0	0	-0.00786202
1630	0	-0.0471721	0	-0.129708	0	-0.0884402
1631	0	-0.172964	0	-0.372911	0	-0.272938
1632	0	-0.15724	0.0162135	-0.129708	0.00810677	-0.143474
1633	0	0	0	-0.0162135	0	-0.00810677
1634	0	-0.235861	0	-0.308057	0	-0.271959
1635	0	-0.0628962	0	-0.194562	0	-0.128729
1636	0	-0.0943443	0	-0.0972812	0	-0.0958127
1637	0	-0.220137	0	-0.210776	0	-0.215456
1638	0	-0.0628962	0	-0.162135	0	-0.112516
1639	0	-0.015724	0	-0.0486406	0	-0.0321823
1640	0	-0.0628962	0	0	0	-0.0314481
1641	0	-0.0471721	0	-0.0810677	0	-0.0641199
1642	0	-0.0314481	0	-0.0972812	0	-0.0643647
1643	0	-0.0786202	0	-0.178349	0	-0.128485
1644	0	-0.125792	0	-0.194562	0	-0.160177
1645	0	-0.0786202	0	-0.178349	0	-0.128485
1646	0	-0.0314481	0	-0.0162135	0	-0.0238308
1647	0	-0.0943443	0	-0.0972812	0	-0.0958127
1648	0	-0.314481	0	-0.389125	0	-0.351803
1649	0	-0.0628962	0	-0.129708	0	-0.0963022
1650	0	0	0	0	0	0
1651	0	-0.0314481	0	-0.0324271	0	-0.0319376
1652	0	-0.235861	0	-0.259417	0	-0.247639
1653	0	-0.251585	0	-0.27563	0	-0.263607
1654	0	-0.0471721	0	-0.129708	0	-0.0884402
1655	0	-0.015724	0.0162135	-0.0648542	0.00810677	-0.0402891
1656	0.015724	0	0	0	0.00786202	0
1657	0	-0.0943443	0	-0.129708	0	-0.112026
1658	0	-0.0471721	0	-0.0486406	0	-0.0479064
1659	0	-0.015724	0	0	0	-0.00786202
1660	0	-0.015724	0	0	0	-0.00786202
1661	0	-0.0471721	0	-0.145922	0	-0.096547
1662	0	-0.0314481	0	-0.129708	0	-0.0805782
1663	0	-0.0628962	0	-0.0648542	0	-0.0638752
1664	0	-0.0628962	0	-0.259417	0	-0.161156
1665	0	-0.0786202	0	-0.113495	0	-0.0960575
1666	0	-0.172964	0	-0.129708	0	-0.151336
1667	0	-0.110068	0	-0.437766	0	-0.273917
1668	0	-0.330205	0	-0.470193	0	-0.400199
1669	0	-0.0314481	0	-0.145922	0	-0.088685
1670	0	-0.0314481	0	-0.129708	0	-0.0805782
1671	0	-0.15724	0	-0.113495	0	-0.135368
1672	0	-0.220137	0	-0.0810677	0	-0.150602
1673	0	-1.19503	0	-1.18359	0	-1.18931
1674	0	-0.267309	0	-0.22699	0	-0.247149
1675	0	0	0	-0.0324271	0	-0.0162135
1676	0	-0.0314481	0	-0.0324271	0	-0.0319376
1677	0	-0.220137	0	-0.0972812	0	-0.158709
1678	0	-0.235861	0.0162135	-0.340484	0.00810677	-0.288172
1679	0	-0.188689	0	-0.421552	0	-0.30512
1680	0	-0.0471721	0	-0.0486406	0	-0.0479064
1681	0	-0.125792	0	-0.129708	0	-0.12775
1682	0	-0.141516	0	-0.0486406	0	-0.0950785
1683	0	-0.0943443	0	-0.162135	0	-0.12824
1684	0	-0.015724	0.0162135	-0.0162135	0.00810677	-0.0159688
1685	0	-0.015724	0	-0.0162135	0	-0.0159688
1686	0	0	0	-0.0810677	0	-0.0405338
1687	0	-0.0314481	0	-0.0162135	0	-0.0238308
1688	0	0	0	-0.0162135	0	-0.00810677
1689	0	-0.015724	0	-0.113495	0	-0.0646094
1690	0	-0.0314481	0	-0.178349	0	-0.104899
1691	0	-0.015724	0	-0.0324271	0	-0.0240756
1692	0	-0.0314481	0	-0.0648542	0	-0.0481511
1693	0	-0.0471721	0	-0.0810677	0	-0.0641199
1694	0	-0.0314481	0	0	0	-0.015724
1695	0	-0.125792	0	-0.178349	0	-0.152071
1696	0	0	0	0	0	0
1697	0	-0.125792	0	-0.0648542	0	-0.0953233
1698	0.015724	-0.015724	0.0162135	0	0.0159688	-0.00786202
1699	0	-0.0786202	0	-0.113495	0	-0.0960575
1700	0.015724	-0.0628962	0	-0.0648542	0.00786202	-0.0638752
1701	0	-0.0314481	0	-0.0486406	0	-0.0400444
1702	0	-0.015724	0	-0.0324271	0	-0.0240756
1703	0	-0.015724	0	-0.0162135	0	-0.0159688
1704	0	0	0	0	0	0
1705	0.015724	0	0	-0.0648542	0.00786202	-0.0324271
1706	0	-0.015724	0	-0.0162135	0	-0.0159688
1707	0	-0.015724	0	-0.0648542	0	-0.0402891
1708	0	-0.0943443	0	-0.0486406	0	-0.0714924
1709	0	-0.0943443	0	-0.113495	0	-0.10392
1710	0	-0.0471721	0.0162135	-0.210776	0.00810677	-0.128974
1711	0	0	0	-0.0162135	0	-0.00810677
1712	0	0	0	-0.0324271	0	-0.0162135
1713	0	0	0	-0.0162135	0	-0.00810677
1714	0	-0.015724	0	-0.0324271	0	-0.0240756
1715	0	-0.0471721	0	-0.0648542	0	-0.0560131
1716	0	0	0	0	0	0
1717	0	0	0	0	0	0
1718	0.0314481	-0.015724	0	-0.0810677	0.015724	-0.0483959
1719	0.015724	0	0	-0.0324271	0.00786202	-0.0162135
1720	0.015724	-0.0471721	0	-0.178349	0.00786202	-0.112761
1721	0	-0.015724	0	0	0	-0.00786202
1722	0	-0.0314481	0.0162135	-0.0162135	0.00810677	-0.0238308
1723	0	-0.015724	0	0	0	-0.00786202
1724	0	0	0	0	0	0
1725	0	0	0	0	0	0
1726	0	0	0	0	0	0
1727	0	0	0	-0.0324271	0	-0.0162135
1728	0	-0.0471721	0	-0.129708	0	-0.0884402
1729	0	-0.188689	0	-0.22699	0	-0.207839
1730	0	-0.015724	0	-0.0162135	0	-0.0159688
1731	0	-0.188689	0	-0.145922	0	-0.167305
1732	0	-0.0314481	0	-0.0486406	0	-0.0400444
1733	0	-0.015724	0	-0.0972812	0	-0.0565026
1734	0	0	0	-0.0486406	0	-0.0243203
1735	0	-0.0314481	0	-0.0810677	0	-0.0562579
1736	0	0	0	0	0	0
1737	0	-0.015724	0	-0.0162135	0	-0.0159688
1738	0	-0.015724	0	0	0	-0.00786202
1739	0	0	0	0	0	0
1740	0	-0.110068	0	-0.162135	0	-0.136102
1741	0	0	0	-0.113495	0	-0.0567474
1742	0	-0.0314481	0	-0.0486406	0	-0.0400444
1743	0	0	0	0	0	0
1744	0	-0.015724	0	-0.0972812	0	-0.0565026
1745	0	-0.015724	0	-0.0324271	0	-0.0240756
1746	0	-0.0628962	0.0162135	-0.0162135	0.00810677	-0.0395549
1747	0	-0.0471721	0	-0.0162135	0	-0.0316928
1748	0	0	0	-0.0324271	0	-0.0162135
1749	0	0	0	0	0	0
1750	0	-0.330205	0	-0.308057	0	-0.319131
1751	0	-0.172964	0	-0.129708	0	-0.151336
1752	0	-0.172964	0	-0.259417	0	-0.216191
1753	0	-0.0314481	0	-0.0162135	0	-0.0238308
1754	0	0	0	0	0	0
1755	0	-0.0943443	0	-0.113495	0	-0.10392
1756	0	-0.0471721	0.0162135	-0.0648542	0.00810677	-0.0560131
1757	0	0	0	0	0	0
1758	0	-0.015724	0	-0.0162135	0	-0.0159688
1759	0	-0.015724	0	-0.0162135	0	-0.0159688
1760	0	-0.172964	0	-0.210776	0	-0.19187
1761	0	-0.172964	0	-0.22699	0	-0.199977
1762	0	-0.487445	0.0324271	-0.50262	0.0162135	-0.495033
1763	0	-0.015724	0	-0.0162135	0	-0.0159688
1764	0	-0.0943443	0	-0.0810677	0	-0.087706
1765	0	-0.0471721	0	-0.0972812	0	-0.0722267
1766	0	-0.110068	0	-0.0810677	0	-0.095568
1767	0	-0.015724	0	-0.0810677	0	-0.0483959
1768	0	-0.0314481	0	-0.0972812	0	-0.0643647
1769	0	-0.015724	0	0	0	-0.00786202
1770	0	-0.188689	0	-0.194562	0	-0.191625
1771	0	-0.0314481	0	-0.0972812	0	-0.0643647
1772	0	-0.015724	0	-0.0972812	0	-0.0565026
1773	0	-0.015724	0	0	0	-0.00786202
1774	0	-0.172964	0	-0.178349	0	-0.175657
1775	0.015724	-0.0314481	0	-0.0324271	0.00786202	-0.0319376
1776	0	-0.015724	0	-0.0162135	0	-0.0159688
1777	0	-0.0314481	0	-0.0324271	0	-0.0319376
1778	0	-0.0628962	0	-0.145922	0	-0.104409
1779	0	-0.015724	0	-0.0486406	0	-0.0321823
1780	0	-0.188689	0	-0.0486406	0	-0.118665
1781	0	0	0	0	0	0
1782	0	0	0	-0.0162135	0	-0.00810677
1783	0	-0.015724	0	-0.0162135	0	-0.0159688
1784	0	-0.0786202	0	-0.0162135	0	-0.0474169
1785	0	-0.141516	0	-0.129708	0	-0.135612
1786	0	-0.125792	0	-0.178349	0	-0.152071
1787	0	-0.125792	0	-0.22699	0	-0.176391
1788	0	-0.0943443	0	-0.27563	0	-0.184987
1789	0	-0.220137	0	-0.113495	0	-0.166816
1790	0	-0.0471721	0	-0.0648542	0	-0.0560131
1791	0	0	0	-0.0486406	0	-0.0243203
1792	0	-0.0628962	0	-0.0648542	0	-0.0638752
1793	0	-0.0786202	0	-0.0324271	0	-0.0555236
1794	0	-0.0314481	0.0162135	-0.0324271	0.00810677	-0.0319376
1795	0	0	0	0	0	0
1796	0	0	0	-0.0324271	0	-0.0162135
1797	0	-0.110068	0	-0.243203	0	-0.176636
1798	0	-0.0314481	0	-0.0162135	0	-0.0238308
1799	0	-0.0314481	0	-0.0486406	0	-0.0400444
1800	0	0	0	-0.0972812	0	-0.0486406
1801	0	0	0	0	0	0
1802	0	-0.015724	0	-0.0162135	0	-0.0159688
1803	0	-0.0314481	0	0	0	-0.015724
1804	0	0	0	-0.0324271	0	-0.0162135
1805	0	0	0	0	0	0
1806	0	0	0	-0.0162135	0	-0.00810677
1807	0	0	0	0	0	0
1808	0	0	0	-0.0324271	0	-0.0162135
1809	0	-0.0314481	0	0	0	-0.015724
1810	0	-0.0471721	0	0	0	-0.0235861
1811	0	0	0	0	0	0
1812	0	-0.0314481	0	0	0	-0.015724
1813	0	0	0	0	0	0
1814	0	0	0	0	0	0
1815	0	-0.015724	0	-0.0162135	0	-0.0159688
1816	0	-0.0786202	0.0162135	-0.0162135	0.00810677	-0.0474169
1817	0	-0.0628962	0	-0.0324271	0	-0.0476616
1818	0	0	0	0	0	0
1819	0	-0.0628962	0	-0.0648542	0	-0.0638752
1820	0	-0.125792	0	-0.145922	0	-0.135857
1821	0	0	0	-0.0486406	0	-0.0243203
1822	0	-0.0471721	0	-0.0972812	0	-0.0722267
1823	0	0	0	0	0	0
1824	0	-0.125792	0	-0.162135	0	-0.143964
1825	0	-0.015724	0	-0.0648542	0	-0.0402891
1826	0	0	0	-0.0162135	0	-0.00810677
1827	0.015724	0	0	0	0.00786202	0
1828	0.0471721	-0.0314481	0	-0.0486406	0.0235861	-0.0400444
1829	0	0	0	-0.0162135	0	-0.00810677
1830	0	-0.015724	0	-0.0324271	0	-0.0240756
1831	0	-0.0314481	0	-0.0648542	0	-0.0481511
1832	0	-0.015724	0	0	0	-0.00786202
1833	0	0	0.0162135	-0.0162135	0.00810677	-0.00810677
1834	0	-0.0314481	0	-0.0162135	0	-0.0238308
1835	0	-0.0314481	0	-0.0648542	0	-0.0481511
1836	0	-0.0314481	0.0162135	0	0.00810677	-0.015724
1837	0	-0.015724	0	0	0	-0.00786202
1838	0	-0.0628962	0	-0.129708	0	-0.0963022
1839	0	-0.0943443	0	-0.178349	0	-0.136347
1840	0	-0.0314481	0.0162135	-0.0324271	0.00810677	-0.0319376
1841	0.015724	0	0	0	0.00786202	0
1842	0	-0.015724	0	0	0	-0.00786202
1843	0	-0.0314481	0	-0.0648542	0	-0.0481511
1844	0	-0.015724	0	-0.0162135	0	-0.0159688
1845	0	-0.0471721	0.0162135	-0.0324271	0.00810677	-0.0397996
1846	0	-0.0471721	0	-0.194562	0	-0.120867
1847	0	-0.204413	0	-0.340484	0	-0.272448
1848	0.0314481	-0.58179	0	-0.405338	0.015724	-0.493564
1849	0	-0.0628962	0.0162135	-0.22699	0.00810677	-0.144943
1850	0	-0.0471721	0	-0.210776	0	-0.128974
1851	0	-0.0471721	0	-0.129708	0	-0.0884402
1852	0	-0.0314481	0.0162135	-0.0648542	0.00810677	-0.0481511
1853	0	-0.015724	0	-0.0162135	0	-0.0159688
1854	0.0314481	-0.0628962	0.0162135	-0.162135	0.0238308	-0.112516
1855	0	-0.015724	0	-0.0486406	0	-0.0321823
1856	0	0	0	-0.0162135	0	-0.00810677
1857	0	-0.0471721	0	-0.0324271	0	-0.0397996
1858	0	-0.015724	0.0162135	-0.0486406	0.00810677	-0.0321823
1859	0	0	0	-0.0486406	0	-0.0243203
1860	0	-0.0471721	0	-0.0324271	0	-0.0397996
1861	0	-0.298757	0	-0.762036	0	-0.530397
1862	0	-0.0628962	0	-0.0324271	0	-0.0476616
1863	0	-0.0628962	0	-0.113495	0	-0.0881955
1864	0	-0.141516	0	-0.259417	0	-0.200466
1865	0	-0.0628962	0	-0.0486406	0	-0.0557684
1866	0	0	0	0	0	0
1867	0	-0.015724	0	-0.0810677	0	-0.0483959
1868	0	0	0	-0.0486406	0	-0.0243203
1869	0	0	0	-0.0324271	0	-0.0162135
1870	0	-0.015724	0	-0.0486406	0	-0.0321823
1871	0	-0.015724	0	-0.0810677	0	-0.0483959
1872	0	0	0	0	0	0
1873	0	-0.0314481	0	-0.0486406	0	-0.0400444
1874	0	-0.0786202	0	-0.0324271	0	-0.0555236
1875	0	-0.015724	0	-0.0972812	0	-0.0565026
1876	0	0	0	0	0	0
1877	0	-0.015724	0	0	0	-0.00786202
1878	0	-0.0628962	0.0162135	0	0.00810677	-0.0314481
1879	0.015724	-0.015724	0.0162135	-0.0810677	0.0159688	-0.0483959
1880	0	-0.0786202	0	-0.0324271	0	-0.0555236
1881	0	-0.0943443	0	-0.0486406	0	-0.0714924
1882	0	-0.0471721	0	-0.0162135	0	-0.0316928
1883	0	-0.0314481	0	-0.0162135	0	-0.0238308
1884	0	0	0	-0.0162135	0	-0.00810677
1885	0	-0.0628962	0	-0.0324271	0	-0.0476616
1886	0	-0.015724	0	-0.0162135	0	-0.0159688
1887	0.015724	-0.141516	0	-0.259417	0.00786202	-0.200466
1888	0	-0.015724	0	-0.0486406	0	-0.0321823
1889	0	0	0	0	0	0
1890	0	-0.0628962	0	-0.0810677	0	-0.0719819
1891	0	-0.015724	0	-0.0648542	0	-0.0402891
1892	0	0	0	-0.0162135	0	-0.00810677
1893	0	-0.015724	0	-0.0162135	0	-0.0159688
1894	0	0	0.0162135	0	0.00810677	0
1895	0	-0.0471721	0	-0.113495	0	-0.0803334
1896	0	-0.0786202	0	0	0	-0.0393101
1897	0	0	0	0	0	0
1898	0	0	0	-0.0324271	0	-0.0162135
1899	0	0	0	0	0	0
1900	0	0	0	-0.0324271	0	-0.0162135
1901	0	0	0	0	0	0
1902	0	0	0	-0.0810677	0	-0.0405338
1903	0.015724	-0.125792	0	-0.0324271	0.00786202	-0.0791097
1904	0	0	0	0	0	0
1905	0	-0.0786202	0	-0.194562	0	-0.136591
1906	0	-0.015724	0.0162135	0	0.00810677	-0.00786202
1907	0	0	0	-0.0162135	0	-0.00810677
1908	0	-0.015724	0	0	0	-0.00786202
1909	0	-0.015724	0	-0.0162135	0	-0.0159688
1910	0	-0.015724	0	-0.0972812	0	-0.0565026
1911	0	-0.015724	0	0	0	-0.00786202
1912	0	-0.0943443	0	-0.113495	0	-0.10392
1913	0	-0.0471721	0	-0.0648542	0	-0.0560131
1914	0	-0.015724	0	-0.0324271	0	-0.0240756
1915	0	-0.0314481	0	-0.0648542	0	-0.0481511
1916	0	-0.0314481	0	0	0	-0.015724
1917	0.0314481	-0.110068	0.0324271	-0.0324271	0.0319376	-0.0712477
1918	0	0	0	0	0	0
1919	0	0	0	0	0	0
1920	0	0	0	0	0	0
1921	0	-0.0471721	0	-0.0810677	0	-0.0641199
1922	0	-0.015724	0	-0.0486406	0	-0.0321823
1923	0	-0.0314481	0	-0.0324271	0	-0.0319376
1924	0	-0.015724	0	-0.0648542	0	-0.0402891
1925	0	0	0	0	0	0
1926	0	-0.015724	0	0	0	-0.00786202
1927	0	-0.015724	0	-0.145922	0	-0.0808229
1928	0	-0.0314481	0	-0.0486406	0	-0.0400444
1929	0	-0.110068	0	-0.145922	0	-0.127995
1930	0	-0.015724	0	0	0	-0.00786202
1931	0	0	0	-0.0648542	0	-0.0324271
1932	0	0	0	-0.0486406	0	-0.0243203
1933	0	-0.0943443	0	-0.0810677	0	-0.087706
1934	0	-0.0314481	0	-0.0810677	0	-0.0562579
1935	0	-0.015724	0	-0.113495	0	-0.0646094
1936	0	-0.801926	0	-0.859318	0	-0.830622
1937	0	-0.0471721	0	-0.0486406	0	-0.0479064
1938	0	-0.0314481	0	-0.0324271	0	-0.0319376
1939	0	-0.0786202	0.0162135	-0.0810677	0.00810677	-0.079844
1940	0	-0.015724	0	0	0	-0.00786202
1941	0	-0.0786202	0.0162135	-0.194562	0.00810677	-0.136591
1942	0.015724	0	0	0	0.00786202	0
1943	0	-0.0628962	0.0162135	-0.0162135	0.00810677	-0.0395549
1944	0	-0.0471721	0	-0.0486406	0	-0.0479064
1945	0	0	0	0	0	0
1946	0	0	0	-0.113495	0	-0.0567474
1947	0	0	0	0	0	0
1948	0	-0.015724	0	0	0	-0.00786202
1949	0	-0.015724	0	-0.0324271	0	-0.0240756
1950	0	0	0	-0.0810677	0	-0.0405338
1951	0	-0.0786202	0	0	0	-0.0393101
1952	0	-0.110068	0	-0.0810677	0	-0.095568
1953	0	-0.0628962	0	-0.145922	0	-0.104409
1954	0	-0.204413	0	-0.324271	0	-0.264342
1955	0	-0.0471721	0	-0.0324271	0	-0.0397996
1956	0.015724	-0.0471721	0	-0.0162135	0.00786202	-0.0316928
1957	0	-0.015724	0	0	0	-0.00786202
1958	0	-0.015724	0	0	0	-0.00786202
1959	0	0	0	-0.0162135	0	-0.00810677
1960	0	-0.0471721	0	0	0	-0.0235861
1961	0	-0.015724	0	0	0	-0.00786202
1962	0	-0.015724	0.0162135	0	0.00810677	-0.00786202
1963	0	-0.015724	0	0	0	-0.00786202
1964	0	-0.015724	0	0	0	-0.00786202
1965	0	0	0	-0.0162135	0	-0.00810677
1966	0	0	0	0	0	0
1967	0.015724	-0.015724	0	-0.0162135	0.00786202	-0.0159688
1968	0	0	0	0	0	0
1969	0	-0.015724	0	0	0	-0.00786202
1970	0.015724	-0.0314481	0	-0.0324271	0.00786202	-0.0319376
1971	0.015724	0	0	0	0.00786202	0
1972	0	-0.015724	0	-0.0162135	0	-0.0159688
1973	0	-0.0314481	0	-0.0162135	0	-0.0238308
1974	0	-0.188689	0	-0.372911	0	-0.2808
1975	0	-0.15724	0	-0.0324271	0	-0.0948338
1976	0	-0.015724	0	-0.0162135	0	-0.0159688
1977	0	-0.0471721	0	-0.0648542	0	-0.0560131
1978	0	-0.0314481	0	-0.0810677	0	-0.0562579
1979	0	-0.0314481	0	-0.0486406	0	-0.0400444
1980	0	-0.125792	0	-0.372911	0	-0.249352
1981	0	-0.0314481	0	0	0	-0.015724
1982	0	-0.015724	0	0	0	-0.00786202
1983	0	0	0	-0.0162135	0	-0.00810677
1984	0	0	0	-0.0324271	0	-0.0162135
1985	0	-0.0314481	0	-0.0162135	0	-0.0238308
1986	0	-0.015724	0.0162135	-0.0162135	0.00810677	-0.0159688
1987	0	-0.0314481	0	-0.0162135	0	-0.0238308
1988	0.015724	-0.0314481	0	-0.0162135	0.00786202	-0.0238308
1989	0	0	0	-0.0162135	0	-0.00810677
1990	0	0	0	0	0	0
1991	0	-0.015724	0	-0.0162135	0	-0.0159688
1992	0	0	0.0162135	-0.0162135	0.00810677	-0.00810677
1993	0	0	0	0	0	0
1994	0.015724	-0.0314481	0	-0.0648542	0.00786202	-0.0481511
1995	0	0	0	0	0	0
1996	0	-0.015724	0	-0.0162135	0	-0.0159688
1997	0	0	0	-0.0162135	0	-0.00810677
1998	0	-0.0314481	0	-0.0486406	0	-0.0400444
1999	0.0314481	-0.15724	0	-0.0486406	0.015724	-0.102941
[truncated: 774 more rows]

## Sheet: S-IS76 30dpi (IS76)
position	fwd 1	rev 1	fwd 2	rev 2	rightward	leftward
1	0	0	0	0	0	0
2	0	-0.0170599	0	0	0	-0.00852993
3	0	-0.0341197	0	0	0	-0.0170599
4	0	0	0	0	0	0
5	0	0	0	0	0	0
6	0	0	0	0	0	0
7	0	0	0	0	0	0
8	0	0	0	-0.0186782	0	-0.00933909
9	0	0	0	0	0	0
10	0	0	0.0186782	0	0.00933909	0
11	0	0	0	-0.0186782	0	-0.00933909
12	0	-0.0341197	0	0	0	-0.0170599
13	0	0	0.0186782	-0.0186782	0.00933909	-0.00933909
14	0	0	0	0	0	0
15	0.0511796	0	0.0186782	-0.0186782	0.0349289	-0.00933909
16	0	0	0	0	0	0
17	0.0170599	-0.0341197	0	-0.0933909	0.00852993	-0.0637553
18	0	0	0.0373564	-0.0373564	0.0186782	-0.0186782
19	0	-0.0341197	0	-0.0186782	0	-0.0263989
20	0.0170599	-0.0170599	0	-0.0747127	0.00852993	-0.0458863
21	0	-0.0170599	0	0	0	-0.00852993
22	0	0	0	0	0	0
23	0	0	0	0	0	0
24	0.0170599	0	0	0	0.00852993	0
25	0	0	0	0	0	0
26	0	0	0	0	0	0
27	0	0	0	0	0	0
28	0	0	0	0	0	0
29	0	0	0	0	0	0
30	0.0341197	0	0	0	0.0170599	0
31	0	0	0	0	0	0
32	0	0	0	0	0	0
33	0	0	0	0	0	0
34	0	0	0	0	0	0
35	0.0170599	0	0	0	0.00852993	0
36	0	-0.0170599	0	0	0	-0.00852993
37	0.0170599	-0.0511796	0	0	0.00852993	-0.0255898
38	0	0	0	0	0	0
39	0	0	0	0	0	0
40	0.0170599	-0.0170599	0	0	0.00852993	-0.00852993
41	0	0	0.0186782	0	0.00933909	0
42	0	-0.0170599	0	-0.0186782	0	-0.017869
43	0	0	0	-0.0186782	0	-0.00933909
44	0	0	0	0	0	0
45	0	-0.0170599	0.0747127	-0.0186782	0.0373564	-0.017869
46	0.0170599	-0.0170599	0	0	0.00852993	-0.00852993
47	0.0170599	-0.0170599	0.0373564	0	0.0272081	-0.00852993
48	0	0	0	0	0	0
49	0.0170599	0	0	0	0.00852993	0
50	0	0	0	0	0	0
51	0	0	0	0	0	0
52	0.0341197	0	0	0	0.0170599	0
53	0	0	0.0186782	-0.0186782	0.00933909	-0.00933909
54	0	0	0	0	0	0
55	0.0170599	0	0	-0.0373564	0.00852993	-0.0186782
56	0	0	0	0	0	0
57	0	0	0	0	0	0
58	0	0	0	0	0	0
59	0	0	0.0186782	0	0.00933909	0
60	0.0511796	0	0	-0.0373564	0.0255898	-0.0186782
61	0.0170599	0	0	0	0.00852993	0
62	0.0852993	0	0.0933909	0	0.0893451	0
63	0.0170599	0	0.0186782	0	0.017869	0
64	0	0	0.0186782	0	0.00933909	0
65	0	0	0	0	0	0
66	0	0	0.0373564	-0.0186782	0.0186782	-0.00933909
67	0	0	0	0	0	0
68	0.0341197	0	0	0	0.0170599	0
69	0	0	0.0933909	0	0.0466955	0
70	0.0341197	-0.0341197	0	0	0.0170599	-0.0170599
71	0	0	0	-0.0186782	0	-0.00933909
72	0	0	0.0186782	0	0.00933909	0
73	0	0	0	0	0	0
74	0.0682394	0	0	-0.0186782	0.0341197	-0.00933909
75	0	0	0	0	0	0
76	0	0	0.0373564	0	0.0186782	0
77	0	0	0	0	0	0
78	0	0	0	-0.0186782	0	-0.00933909
79	0	0	0.0373564	0	0.0186782	0
80	0	0	0	0	0	0
81	0.0341197	0	0.0373564	0	0.035738	0
82	0	0	0	0	0	0
83	0.0511796	-0.0170599	0.0186782	0	0.0349289	-0.00852993
84	0	0	0.0186782	0	0.00933909	0
85	0	0	0.0373564	0	0.0186782	0
86	0.0170599	0	0.0186782	0	0.017869	0
87	0.0170599	0	0	0	0.00852993	0
88	0	0	0	0	0	0
89	0	0	0	0	0	0
90	0	0	0	0	0	0
91	0.0341197	0	0	-0.0186782	0.0170599	-0.00933909
92	0.0682394	0	0.112069	0	0.0901543	0
93	0.0170599	0	0	0	0.00852993	0
94	0	0	0	0	0	0
95	0	0	0	0	0	0
96	0.0170599	0	0	0	0.00852993	0
97	0.0852993	-0.0170599	0	0	0.0426496	-0.00852993
98	0	0	0	-0.0373564	0	-0.0186782
99	0	0	0.0186782	0	0.00933909	0
100	0.0511796	0	0	-0.0373564	0.0255898	-0.0186782
101	0.0341197	0	0.112069	0	0.0730944	0
102	0.0511796	0	0	0	0.0255898	0
103	0.0170599	0	0.0186782	0	0.017869	0
104	0	0	0	0	0	0
105	0	0	0	0	0	0
106	0	0	0	-0.0186782	0	-0.00933909
107	0	0	0	0	0	0
108	0	0	0	0	0	0
109	0	0	0	0	0	0
110	0	0	0	0	0	0
111	0.0511796	0	0.0186782	0	0.0349289	0
112	0	0	0	-0.0186782	0	-0.00933909
113	0	0	0	0	0	0
114	0	0	0	0	0	0
115	0	0	0	0	0	0
116	0	0	0	-0.0186782	0	-0.00933909
117	0.0170599	0	0	0	0.00852993	0
118	0	0	0	0	0	0
119	0	0	0	0	0	0
120	0.0341197	0	0.0747127	0	0.0544162	0
121	0.0341197	0	0	0	0.0170599	0
122	0.102359	0	0	0	0.0511796	0
123	0	0	0.0747127	0	0.0373564	0
124	0	0	0	0	0	0
125	0.0852993	0	0.0747127	0	0.080006	0
126	0.0511796	0	0.168104	0	0.109642	0
127	0.0341197	0	0	0	0.0170599	0
128	0.0341197	0	0.0373564	0	0.035738	0
129	0	0	0.0186782	0	0.00933909	0
130	0	0	0	0	0	0
131	0	0	0	0	0	0
132	0.0170599	0	0.0373564	-0.0373564	0.0272081	-0.0186782
133	0	0	0.0186782	0	0.00933909	0
134	0	0	0	0	0	0
135	0.0170599	0	0.0186782	0	0.017869	0
136	0	0	0.0186782	0	0.00933909	0
137	0.0170599	0	0.0186782	0	0.017869	0
138	0.0170599	0	0	0	0.00852993	0
139	0.0341197	0	0.0747127	0	0.0544162	0
140	0	0	0.0186782	0	0.00933909	0
141	0	0	0.0560345	0	0.0280173	0
142	0.187658	0	0.168104	0	0.177881	0
143	0.0682394	0	0.0186782	0	0.0434588	0
144	0.460616	0	0.485633	0	0.473124	0
145	0.204718	0	0.261495	0	0.233106	0
146	0.392377	0	0.672415	-0.0373564	0.532396	-0.0186782
147	0.238838	0	0.261495	0	0.250166	0
148	6.26097	0	7.17242	0	6.71669	0
149	3.08783	0	3.54885	0	3.31834	0
150	4.35026	-0.0170599	5.77156	-0.0186782	5.06091	-0.017869
151	1.41597	0	1.56897	0	1.49247	0
152	3.99201	0	4.57615	0	4.28408	0
153	3.99201	0	4.09052	0	4.04126	0
154	7.33574	0	6.68679	0	7.01126	0
155	1.996	0	2.63362	0	2.31481	0
156	0.375317	0	0.112069	0	0.243693	0
157	0.887113	-0.0170599	1.00862	0	0.947867	-0.00852993
158	0.887113	0	0.784484	0	0.835798	0
159	0.392377	0	0.373564	0	0.38297	0
160	1.43303	0	0.952587	0	1.19281	0
161	0.887113	0	1.23276	0	1.05994	0
162	0.699454	0	0.691093	0	0.695273	0
163	1.14301	0	1.34483	0	1.24392	0
164	0.153539	0	0.224138	0	0.188838	0
165	3.59963	-0.0170599	4.80029	0	4.19996	-0.00852993
166	1.07477	0	1.21408	0	1.14443	0
167	3.22431	0	2.98851	0	3.10641	0
168	1.55245	0	1.83046	0	1.69145	0
169	2.7637	0	3.30604	0	3.03487	0
170	3.15607	0	4.7069	0	3.93149	0
171	0.443556	0	0.522989	0	0.483273	0
172	0.0682394	0	0.242816	0	0.155528	0
173	0.0341197	0	0.0373564	0	0.035738	0
174	0.136479	0	0.112069	0	0.124274	0
175	0.204718	0	0.130747	0	0.167733	0
176	1.29655	0	1.34483	0	1.32069	0
177	0.648275	0	0.541667	0	0.594971	0
178	0.665334	0	0.597702	-0.0186782	0.631518	-0.00933909
179	1.65481	0	1.86782	0	1.76131	0
180	0.494736	0	0.298851	0	0.396793	0
181	1.55245	0	1.56897	0	1.56071	0
182	1.55245	0	1.23276	0	1.3926	0
183	0.0852993	0	0.130747	0	0.108023	0
184	1.10889	0	1.8865	0	1.49769	0
185	0.392377	0	0.392242	0	0.392309	0
186	0.545915	0	0.560345	0	0.55313	0
187	0.153539	0	0.261495	0	0.207517	0
188	0.187658	0	0.224138	0	0.205898	0
189	2.88312	0	3.77299	0	3.32805	0
190	1.04065	0	0.803162	0	0.921907	0
191	0.938292	0	0.485633	0	0.711962	0
192	1.33067	-0.0170599	1.56897	0	1.44982	-0.00852993
193	0.852993	0	0.840518	0	0.846756	0
194	0.102359	0	0.0747127	0	0.0885359	0
195	0.204718	0	0.429598	0	0.317158	0
196	2.7637	0	2.33477	-0.0186782	2.54923	-0.00933909
197	0.0511796	0	0.0186782	0	0.0349289	0
198	0.716514	0	0.466955	0	0.591734	0
199	1.19419	0	1.47558	-0.0373564	1.33488	-0.0186782
200	0.545915	0	0.336207	0	0.441061	0
201	0.238838	-0.0170599	0.224138	0	0.231488	-0.00852993
202	0.187658	0	0.354885	0	0.271272	0
203	0.648275	0	0.915231	0	0.781753	0
204	0.0341197	0	0.0747127	0	0.0544162	0
205	0.767694	0	0.784484	0	0.776089	0
206	1.07477	0	1.04598	-0.0186782	1.06037	-0.00933909
207	0.204718	0	0.429598	0	0.317158	0
208	0.0682394	0	0.0560345	0	0.062137	0
209	0.733574	0	0.915231	0	0.824402	0
210	2.26896	0	1.81178	0	2.04037	0
211	0.204718	0	0.336207	0	0.270463	0
212	0.562975	0	0.373564	0	0.468269	0
213	1.31361	0	0.747127	0	1.03037	0
214	0.290018	0	0.392242	0	0.34113	0
215	0.0170599	0	0.0747127	0	0.0458863	0
216	0.221778	0	0.280173	0	0.250975	0
217	0.375317	0	0.373564	0	0.37444	0
218	0.0341197	0	0	0	0.0170599	0
219	0.119419	0	0.112069	0	0.115744	0
220	0.409437	0	0.448276	0	0.428856	0
221	1.09183	0	0.784484	0	0.938157	0
222	0	0	0.0186782	0	0.00933909	0
223	0.341197	0	0.0560345	0	0.198616	0
224	2.74664	-0.0170599	2.27874	0	2.51269	-0.00852993
225	2.78076	0	2.42816	0	2.60446	0
226	4.36732	0	4.01581	0	4.19157	0
227	1.75717	0	1.32615	0	1.54166	0
228	1.04065	0	1.15805	0	1.09935	0
229	0.562975	0	0.354885	0	0.45893	0
230	0.290018	0	0.186782	0	0.2384	0
231	1.92776	0	2.07328	0	2.00052	0
232	0.307077	0	0.298851	0	0.302964	0
233	3.53139	0	3.21265	0	3.37202	0
234	1.04065	0	1.0273	0	1.03398	0
235	7.40398	0	9.50719	0	8.45559	0
236	1.46715	0	1.10201	0	1.28458	0
237	1.31361	0	1.41954	0	1.36658	0
238	2.91724	-0.0170599	2.74569	0	2.83146	-0.00852993
239	0.938292	0	1.12069	0	1.02949	0
240	3.51433	0	2.4842	-0.0186782	2.99926	-0.00933909
241	1.65481	0	1.41954	0	1.53717	0
242	5.40798	-0.0170599	5.41667	0	5.41232	-0.00852993
243	1.22831	0	1.04598	0	1.13714	0
244	0.255898	0	0.280173	0	0.268035	0
245	0.972412	0	0.859196	0	0.915804	0
246	6.32921	0	6.44397	0	6.38659	0
247	2.01306	0	2.4842	0	2.24863	0
248	1.63775	0	1.97989	0	1.80882	0
249	1.80835	0	1.15805	0	1.4832	0
250	0.904173	0	0.709771	0	0.806972	0
251	1.10889	0	0.784484	0	0.946687	0
252	1.53539	0	1.08333	0	1.30936	0
253	0.648275	0	0.597702	0	0.622988	0
254	0.750634	0	0.784484	0	0.767559	0
255	0.955352	0	1.32615	0	1.14075	0
256	1.70599	0	1.58765	0	1.64682	0
257	1.48421	0	1.43822	0	1.46121	0
258	6.38039	0	6.44397	0	6.41218	0
259	0.784754	0	0.803162	0	0.793958	0
260	0.938292	0	0.653736	0	0.796014	0
261	0.409437	0	0.317529	0	0.363483	0
262	0.818873	0	0.354885	0	0.586879	0
263	0.631215	0	0.41092	0	0.521067	0
264	0.0682394	0	0.112069	0	0.0901543	0
265	0.460616	0	0.317529	0	0.389073	0
266	0.870053	0	0.61638	0	0.743216	0
267	0.904173	0	0.896553	0	0.900363	0
268	0.921232	0	0.485633	0	0.703433	0
269	0.119419	0	0.0933909	0	0.106405	0
270	0.597095	0	0.354885	0	0.47599	0
271	0.0170599	0	0.0373564	0	0.0272081	0
272	6.89218	0	6.07041	0	6.4813	0
273	0.443556	0	0.298851	0	0.371204	0
274	1.51833	0	0.803162	0	1.16074	0
275	0.955352	0	0.691093	0	0.823222	0
276	3.17313	0	2.37213	0	2.77263	0
277	17.4181	0	13.2802	0	15.3492	0
278	0.204718	0	0.0747127	0	0.139716	0
279	1.05771	0	0.82184	0	0.939776	0
280	0.153539	0	0.0560345	0	0.104787	0
281	1.97894	0	1.73707	0	1.85801	0
282	0.0852993	0	0.0373564	0	0.0613278	0
283	0.375317	-0.0170599	0.242816	0	0.309067	-0.00852993
284	0.870053	0	0.728449	0	0.799251	0
285	0.136479	0	0.130747	0	0.133613	0
286	1.19419	0	0.373564	0	0.783877	0
287	0.989472	0	0.747127	0	0.8683	0
288	6.22685	0	5.09914	0	5.663	0
289	1.77423	-0.0170599	1.51293	0	1.64358	-0.00852993
290	1.34773	0	1.32615	0	1.33694	0
291	2.32014	0	2.03592	0	2.17803	0
292	1.68893	0	1.17673	0	1.43283	0
293	3.05371	0	2.03592	-0.0186782	2.54482	-0.00933909
294	1.87658	0	1.73707	0	1.80683	0
295	1.56951	0	0.915231	0	1.24237	0
296	1.22831	0	1.27012	0	1.24921	0
297	1.62069	0	1.40086	0	1.51078	0
298	1.33067	0	0.989944	0	1.16031	0
299	0.938292	0	0.560345	0	0.749319	0
300	0.665334	0	0.691093	0	0.678214	0
301	1.39891	0	1.04598	0	1.22244	0
302	9.29762	0	7.63938	0	8.4685	0
303	0.580035	0	0.242816	0	0.411426	0
304	1.43303	0	1.30747	0	1.37025	0
305	0.580035	0	0.485633	0	0.532834	0
306	0.272958	0	0.485633	0	0.379295	0
307	1.33067	0	0.877875	0	1.10427	0
308	0.392377	0	0.261495	0	0.326936	0
309	1.8254	0	1.49425	0	1.65983	0
310	0.989472	0	0.635058	0	0.812265	0
311	0.290018	0	0.392242	0	0.34113	0
312	4.19673	-0.0170599	5.32328	-0.0186782	4.76	-0.017869
313	2.4225	-0.0170599	1.90517	0	2.16384	-0.00852993
314	9.0929	0	7.43392	0	8.26341	0
315	1.72305	0	1.25144	0	1.48724	0
316	2.32014	0	1.83046	0	2.0753	0
317	1.02359	0	0.635058	0	0.829325	0
318	1.00653	0	0.803162	0	0.904847	0
319	0.938292	0	0.952587	-0.0186782	0.94544	-0.00933909
320	1.34773	0	1.12069	0	1.23421	0
321	0.767694	0	0.560345	0	0.66402	0
322	0.460616	0	0.522989	0	0.491803	0
323	2.66134	0	2.03592	0	2.34863	0
324	8.81995	0	6.50001	0	7.65998	0
325	3.39491	0	2.20403	0	2.79947	0
326	2.47368	0	2.52155	0	2.49762	0
327	11.7372	-0.0170599	10.3477	0	11.0424	-0.00852993
328	1.33067	0	1.21408	0	1.27238	0
329	0.818873	0	0.541667	0	0.68027	0
330	0.682394	0	0.522989	0	0.602692	0
331	0.528856	0	0.41092	0	0.469888	0
332	0.153539	0	0.224138	0	0.188838	0
333	0.358257	0	0.261495	0	0.309876	0
334	1.14301	-0.0170599	1.06466	0	1.10383	-0.00852993
335	3.49727	0	2.76437	0	3.13082	0
336	1.09183	0	0.784484	0	0.938157	0
337	3.92377	0	3.25	0	3.58689	0
338	0.358257	0	0.541667	0	0.449962	0
339	0.614155	0	0.336207	0	0.475181	0
340	0.443556	0	0.971265	0	0.707411	0
341	2.86606	0	3.45546	0	3.16076	0
342	0.631215	0	0.61638	0	0.623797	0
343	9.31468	0	9.2457	-0.0186782	9.28019	-0.00933909
344	2.13248	0	2.14799	0	2.14024	0
345	1.74011	0	1.71839	0	1.72925	0
346	1.56951	0	1.21408	0	1.39179	0
347	1.67187	0	1.27012	0	1.47099	0
348	4.09437	0	3.90374	0	3.99905	0
349	0.0852993	0	0.0933909	0	0.0893451	0
350	0.153539	0	0.317529	0	0.235534	0
351	0.460616	0	0.298851	0	0.379734	0
352	1.55245	0	0.952587	0	1.25252	0
353	1.58657	0	1.4569	0	1.52173	0
354	4.06025	0	3.77299	0	3.91662	0
355	0.801813	0	0.541667	0	0.67174	0
356	0.204718	0	0.20546	0	0.205089	0
357	0.716514	0	0.466955	0	0.591734	0
358	2.0813	0	2.27874	0	2.18002	0
359	4.09437	0	4.29598	0	4.19517	0
360	4.38438	-0.0170599	4.07184	0	4.22811	-0.00852993
361	3.65081	0	2.85776	0	3.25429	0
362	6.9263	0	4.81897	0	5.87264	0
363	1.79129	0	1.41954	0	1.60541	0
364	5.20326	0	4.87501	0	5.03913	0
365	6.19273	0	8.89081	-0.0186782	7.54177	-0.00933909
366	0.324137	0	0.466955	0	0.395546	0
367	0.801813	0	0.933909	0	0.867861	0
368	0.938292	0	0.971265	0	0.954779	0
369	0.443556	0	0.317529	0	0.380543	0
370	0.170599	0	0.112069	0	0.141334	0
371	4.04319	0	3.88506	0	3.96412	0
372	1.22831	0	1.28879	0	1.25855	0
373	4.11143	0	3.53018	0	3.8208	0
374	2.23484	-0.0341197	2.12931	0	2.18208	-0.0170599
375	0.750634	0	1.15805	0	0.954341	0
376	1.67187	0	2.26006	0	1.96596	0
377	1.24537	0	1.23276	0	1.23906	0
378	0.494736	0	0.522989	0	0.508862	0
379	2.03012	0	2.50288	0	2.2665	0
380	4.28202	0	4.44541	0	4.36372	0
381	2.09836	0	2.35345	0	2.22591	0
382	0.392377	0	0.522989	0	0.457683	0
383	2.38838	0	1.92385	0	2.15612	0
384	0.375317	0	0.522989	0	0.449153	0
385	4.99854	0	4.44541	0	4.72197	0
386	1.60363	0	1.8865	0	1.74506	0
387	6.12449	0	5.75288	0	5.93868	0
388	0.955352	0	0.877875	0	0.916613	0
389	1.80835	0	0.859196	0	1.33377	0
390	2.18366	0	2.18535	0	2.1845	0
391	0.443556	0	0.41092	0	0.427238	0
392	1.24537	0	1.55029	0	1.39783	0
393	5.66387	0	5.93966	-0.0186782	5.80177	-0.00933909
394	0.307077	0	0.242816	0	0.274947	0
395	0.443556	0	0.41092	0	0.427238	0
396	1.14301	0	1.28879	0	1.2159	0
397	1.22831	0	0.989944	0	1.10913	0
398	2.83194	0	3.00719	0	2.91956	0
399	6.00507	0	4.85633	0	5.4307	0
400	4.4185	0	5.02443	0	4.72147	0
401	3.49727	0	3.19397	0	3.34562	0
402	1.87658	0	2.29742	0	2.087	0
403	0.716514	0	0.859196	0	0.787855	0
404	0.358257	0	0.298851	0	0.328554	0
405	2.71252	0	2.96983	-0.0186782	2.84117	-0.00933909
406	0.119419	0	0.0747127	0	0.0970659	0
407	0.716514	0	0.635058	0	0.675786	0
408	0.750634	0	0.653736	0	0.702185	0
409	1.43303	0	0.691093	0	1.06206	0
410	1.24537	0	0.840518	0	1.04294	0
411	7.74518	0	8.44254	-0.0186782	8.09386	-0.00933909
412	7.2675	-0.0170599	6.91093	-0.0186782	7.08921	-0.017869
413	6.841	0	6.78018	0	6.81059	0
414	5.80035	-0.0170599	5.26725	0	5.5338	-0.00852993
415	4.70852	0	3.81035	0	4.25944	0
416	2.88312	0	2.59627	0	2.73969	0
417	0.989472	0	0.877875	0	0.933673	0
418	0.307077	0	0.392242	0	0.34966	0
419	1.65481	0	1.68104	0	1.66792	0
420	0.972412	0	1.34483	0	1.15862	0
421	1.72305	0	1.84914	-0.0186782	1.78609	-0.00933909
422	3.00254	0	2.4842	0	2.74337	0
423	1.75717	0	1.81178	0	1.78447	0
424	0.580035	0	0.597702	0	0.588869	0
425	0.307077	0	0.448276	0	0.377677	0
426	8.51287	0	8.10633	0	8.3096	0
427	1.00653	0	0.765805	0	0.886169	0
428	3.87259	0	4.74426	0	4.30842	0
429	0.341197	0	0.280173	0	0.310685	0
430	6.51687	0	7.99426	0	7.25556	0
431	0.887113	0	0.915231	0	0.901172	0
432	4.46968	0	4.74426	0	4.60697	0
433	3.80435	0	4.66955	0	4.23695	0
434	2.74664	-0.0170599	2.37213	0	2.55938	-0.00852993
435	1.9107	0	1.625	0	1.76785	0
436	1.8254	0	1.51293	0	1.66917	0
437	2.96842	0	3.04454	0	3.00648	0
438	4.845	0	4.23995	0	4.54247	0
439	1.24537	0	1.17673	0	1.21105	0
440	0.870053	0	0.747127	0	0.80859	0
441	5.20326	0	4.1092	0	4.65623	0
442	5.90271	0	5.7342	0	5.81846	0
443	4.65734	0	3.53018	0	4.09376	0
444	7.06278	0	7.88219	0	7.47249	0
445	0.545915	0	0.466955	0	0.506435	0
446	2.26896	0	2.11063	0	2.1898	0
447	0.870053	0	0.896553	0	0.883303	0
448	2.86606	0	3.43679	0	3.15142	0
449	3.56551	0	4.40805	-0.0186782	3.98678	-0.00933909
450	0.255898	0	0.242816	0	0.249357	0
451	1.24537	0	1.58765	0	1.41651	0
452	2.69546	-0.0170599	3.06322	0	2.87934	-0.00852993
453	3.61669	0	3.88506	0	3.75088	0
454	1.00653	0	0.971265	-0.0186782	0.988899	-0.00933909
455	1.72305	0	1.32615	0	1.5246	0
456	12.8461	0	12.5331	0	12.6896	0
457	0.477676	0	0.840518	0	0.659097	0
458	12.4366	0	13.2428	-0.0373564	12.8397	-0.0186782
459	0.904173	-0.0170599	0.82184	-0.0186782	0.863006	-0.017869
460	5.76623	0	5.49139	-0.0373564	5.62881	-0.0186782
461	2.2519	0	2.2227	0	2.2373	0
462	3.58257	0	3.41811	-0.0560345	3.50034	-0.0280173
463	3.03665	0	2.98851	0	3.01258	0
464	1.31361	0	1.49425	0	1.40393	0
465	0.767694	0	0.784484	0	0.776089	0
466	1.00653	0	1.25144	0	1.12898	0
467	0.887113	0	0.896553	0	0.891833	0
468	0.750634	0	0.877875	0	0.814254	0
469	4.11143	-0.0341197	5.21121	0	4.66132	-0.0170599
470	2.13248	-0.0170599	3.15661	0	2.64455	-0.00852993
471	3.03665	0	2.89512	0	2.96589	0
472	0.767694	0	0.709771	0	0.738732	0
473	2.52486	0	3.39943	0	2.96214	0
474	1.14301	0	1.12069	0	1.13185	0
475	2.54192	0	2.40949	0	2.4757	0
476	1.70599	0	1.625	0	1.66549	0
477	0.750634	0	0.933909	0	0.842271	0
478	2.21778	0	2.80173	0	2.50975	0
479	1.07477	0	1.10201	0	1.08839	0
480	3.15607	-0.0170599	3.11926	0	3.13767	-0.00852993
481	1.96188	0	1.79311	0	1.87749	0
482	1.62069	0	1.60632	0	1.61351	0
483	2.81488	0	3.45546	0	3.13517	0
484	0.409437	0	0.653736	0	0.531586	0
485	2.54192	0	2.67098	0	2.60645	0
486	1.50127	-0.0511796	1.77443	0	1.63785	-0.0255898
487	0.750634	0	0.952587	0	0.851611	0
488	1.36479	0	1.15805	0	1.26142	0
489	0.921232	0	1.17673	0	1.04898	0
490	1.29655	0	1.30747	0	1.30201	0
491	2.90018	0	3.32472	0	3.11245	0
492	6.44863	-0.0170599	7.24713	0	6.84788	-0.00852993
493	2.28602	0	2.14799	0	2.21701	0
494	1.87658	0	2.24138	0	2.05898	0
495	4.86206	0	5.19253	0	5.0273	0
496	9.29762	-0.0170599	10.217	-0.0186782	9.75729	-0.017869
497	2.23484	0	2.89512	0	2.56498	0
498	2.98548	0	3.11926	0	3.05237	0
499	2.45662	-0.0511796	2.85776	0	2.65719	-0.0255898
500	0.904173	0	0.933909	0	0.919041	0
501	0.972412	0	0.859196	0	0.915804	0
502	2.04718	0	1.84914	0	1.94816	0
503	2.26896	0	2.27874	0	2.27385	0
504	2.09836	0	2.46552	0	2.28194	0
505	3.82141	0	4.93104	0	4.37622	0
506	1.94482	0	1.86782	0	1.90632	0
507	1.60363	0	2.01724	0	1.81044	0
508	0.307077	0	0.429598	0	0.368338	0
509	0.870053	0	0.859196	0	0.864625	0
510	3.56551	0	4.22127	0	3.89339	0
511	1.36479	0	1.23276	-0.0186782	1.29877	-0.00933909
512	3.44609	0	4.40805	0	3.92707	0
513	0.341197	0	0.392242	0	0.366719	0
514	1.36479	-0.0170599	1.43822	-0.0186782	1.4015	-0.017869
515	1.07477	0	1.47558	0	1.27517	0
516	2.86606	0	2.96983	0	2.91794	0
517	5.44209	0	7.13507	0	6.28858	0
518	0.562975	0	0.82184	0	0.692408	0
519	1.43303	0	1.28879	0	1.36091	0
520	0.562975	0	0.485633	0	0.524304	0
521	0.426496	0	0.560345	0	0.493421	0
522	5.47621	0	5.62213	0	5.54917	0
523	0.204718	0	0.130747	0	0.167733	0
524	0.887113	0	1.12069	0	1.0039	0
525	0.511796	0	0.541667	0	0.526732	0
526	6.10743	0	6.48133	0	6.29438	0
527	1.19419	0	1.99857	0	1.59638	0
528	0.972412	0	1.12069	0	1.04655	0
529	1.51833	0	2.11063	0	1.81448	0
530	1.70599	0	1.58765	0	1.64682	0
531	2.13248	0	2.78305	0	2.45777	0
532	1.34773	0	1.55029	0	1.44901	0
533	3.51433	0	3.60489	0	3.55961	0
534	6.94336	0	7.56466	0	7.25401	0
535	1.48421	0	1.34483	0	1.41452	0
536	2.37132	0	2.27874	0	2.32503	0
537	1.53539	0	1.47558	0	1.50548	0
538	0.887113	0	1.1954	0	1.04126	0
539	0.682394	0	0.877875	0	0.780134	0
540	5.73211	0	6.91093	0	6.32152	0
541	1.79129	0	2.24138	0	2.01633	0
542	8.41051	0	10.3104	-0.0186782	9.36043	-0.00933909
543	1.36479	0	1.92385	0	1.64432	0
544	5.40798	-0.0511796	7.48995	-0.0186782	6.44896	-0.0349289
545	2.06424	0	2.40949	0	2.23686	0
546	0.835933	0	1.06466	0	0.950295	0
547	0.426496	0	0.504311	0	0.465404	0
548	2.55898	0	3.28736	0	2.92317	0
549	4.40144	0	5.86495	0	5.1332	0
550	0.170599	0	0.112069	0	0.141334	0
551	1.05771	-0.0170599	1.4569	0	1.2573	-0.00852993
552	2.47368	0	2.2227	0	2.34819	0
553	2.38838	0	2.59627	0	2.49232	0
554	0.767694	0	0.877875	0	0.822784	0
555	0.665334	0	0.672415	0	0.668875	0
556	0.0682394	0	0.0186782	0	0.0434588	0
557	0.477676	0	0.392242	0	0.434959	0
558	0.119419	0	0.0560345	0	0.0877268	0
559	0.784754	0	1.21408	0	0.999418	0
560	0.784754	0	0.82184	0	0.803297	0
561	1.46715	-0.0341197	1.53161	0	1.49938	-0.0170599
562	0.818873	0	1.12069	0	0.969782	0
563	0.341197	0	0.336207	0	0.338702	0
564	0.682394	0	0.691093	0	0.686744	0
565	1.85952	0	1.41954	0	1.63953	0
566	17.9811	0	19.7242	-0.0747127	18.8526	-0.0373564
567	12.2149	0	14.9425	0	13.5787	0
568	4.36732	0	4.89368	0	4.6305	0
569	0.750634	0	0.541667	0	0.646151	0
570	3.46315	0	4.33334	0	3.89824	0
571	3.12195	0	3.49282	0	3.30739	0
572	2.45662	0	2.11063	0	2.28363	0
573	3.03665	0	3.34339	0	3.19002	0
574	0.562975	0	0.784484	0	0.673729	0
575	0.392377	0	0.298851	0	0.345614	0
576	0.716514	0	0.653736	0	0.685125	0
577	0.136479	0	0.0560345	0	0.0962567	0
578	0.972412	0	0.877875	0	0.925143	0
579	2.09836	0	1.625	0	1.86168	0
580	2.74664	0	3.28736	0	3.017	0
581	2.18366	0	2.26006	0	2.22186	0
582	2.55898	0	2.37213	0	2.46555	0
583	0.392377	0	0.691093	0	0.541735	0
584	8.05225	0	7.91955	0	7.9859	0
585	5.64681	0	7.28449	0	6.46565	0
586	0.187658	0	0.242816	0	0.215237	0
587	3.46315	0	3.34339	0	3.40327	0
588	7.55752	0	8.55461	-0.0186782	8.05606	-0.00933909
589	3.32667	0	4.29598	0	3.81133	0
590	2.30308	0	3.21265	0	2.75786	0
591	3.63375	-0.0170599	4.52012	0	4.07693	-0.00852993
592	1.07477	0	1.55029	0	1.31253	0
593	3.27549	0	4.29598	0	3.78574	0
594	1.14301	0	0.859196	0	1.0011	0
595	0.102359	0	0.0560345	0	0.0791968	0
596	0.733574	0	0.952587	-0.0186782	0.843081	-0.00933909
597	1.19419	0	1.32615	0	1.26017	0
598	5.23738	0	7.71409	0	6.47573	0
599	0.801813	0	0.82184	0	0.811827	0
600	7.33574	0	8.47989	0	7.90782	0
601	5.42504	0	7.1911	0	6.30807	0
602	1.77423	0	1.66236	0	1.71829	0
603	4.09437	0	4.16523	0	4.1298	0
604	0.801813	0	0.933909	0	0.867861	0
605	3.97495	0	4.40805	0	4.1915	0
606	3.48021	0	5.52874	0	4.50448	0
607	4.82794	0	6.70547	0	5.7667	0
608	1.8254	0	1.81178	0	1.81859	0
609	2.2519	0	2.14799	0	2.19995	0
610	0.153539	0	0.0747127	0	0.114126	0
611	0.221778	0	0.317529	0	0.269654	0
612	0.716514	0	0.541667	0	0.629091	0
613	0.290018	0	0.336207	0	0.313112	0
614	0.511796	-0.0170599	0.803162	0	0.657479	-0.00852993
615	2.01306	-0.0511796	2.40949	-0.0747127	2.21127	-0.0629462
616	0.255898	0	0.298851	0	0.277374	0
617	1.51833	-0.0170599	1.625	-0.0186782	1.57166	-0.017869
618	0.477676	0	0.61638	0	0.547028	0
619	2.86606	-0.0170599	3.60489	0	3.23547	-0.00852993
620	0.580035	0	0.728449	-0.0186782	0.654242	-0.00933909
621	4.52086	-0.0170599	5.52874	-0.0186782	5.0248	-0.017869
622	2.95136	0	3.17529	-0.0186782	3.06332	-0.00933909
623	2.9343	-0.0341197	3.75431	-0.0373564	3.34431	-0.035738
624	1.48421	0	1.34483	-0.0186782	1.41452	-0.00933909
625	1.53539	-0.0341197	1.64368	0	1.58953	-0.0170599
626	12.4366	-0.0170599	16.6236	-0.0186782	14.5301	-0.017869
627	4.04319	0	4.78161	0	4.4124	0
628	1.96188	-0.0341197	1.90517	-0.0186782	1.93353	-0.0263989
629	2.9343	0	2.52155	0	2.72793	0
630	0.392377	0	0.392242	0	0.392309	0
631	2.86606	-0.0170599	2.68966	-0.0373564	2.77786	-0.0272081
632	0.494736	-0.0170599	0.485633	0	0.490184	-0.00852993
633	5.32268	0	7.56466	-0.0560345	6.44367	-0.0280173
634	5.40798	0	6.53736	-0.0186782	5.97267	-0.00933909
635	1.9107	0	2.07328	0	1.99199	0
636	11.3789	-0.0511796	12.7946	-0.0186782	12.0867	-0.0349289
637	5.25444	0	7.82616	-0.0186782	6.5403	-0.00933909
638	10.2359	-0.0682394	12.0287	0	11.1323	-0.0341197
639	2.54192	-0.0170599	3.90374	0	3.22283	-0.00852993
640	1.31361	0	1.75575	0	1.53468	0
641	1.67187	0	2.18535	-0.0373564	1.92861	-0.0186782
642	0.682394	0	1.06466	0	0.873525	0
643	1.10889	-0.0170599	0.560345	0	0.834618	-0.00852993
644	1.75717	0	1.36351	0	1.56034	0
645	1.17713	0	0.728449	0	0.95279	0
646	2.66134	0	3.49282	0	3.07708	0
647	5.32268	0	7.60202	0	6.46235	0
648	2.47368	0	2.26006	0	2.36687	0
649	4.53792	0	4.07184	0	4.30488	0
650	9.99708	0	11.5618	0	10.7794	0
651	6.51687	0	7.48995	0	7.00341	0
652	12.5561	0	12.4023	0	12.4792	0
653	1.58657	0	1.84914	0	1.71785	0
654	1.77423	-0.0170599	1.47558	0	1.6249	-0.00852993
655	2.01306	0	2.59627	0	2.30467	0
656	1.87658	0	1.90517	0	1.89088	0
657	0.989472	0	0.635058	0	0.812265	0
658	0.0511796	0	0.0560345	0	0.0536071	0
659	0.409437	0	0.747127	0	0.578282	0
660	4.07731	0	6.29455	-0.0560345	5.18593	-0.0280173
661	0.972412	0	0.952587	0	0.9625	0
662	2.01306	-0.0341197	2.44684	0	2.22995	-0.0170599
663	0.648275	0	0.691093	0	0.669684	0
664	6.03919	-0.0341197	7.06035	0	6.54977	-0.0170599
665	1.02359	0	0.896553	0	0.960072	0
666	10.3553	0	14.4943	-0.0186782	12.4248	-0.00933909
667	0.341197	0	0.466955	0	0.404076	0
668	2.49074	0	2.26006	0	2.3754	0
669	4.77676	0	6.79886	-0.0373564	5.78781	-0.0186782
670	0.887113	0	1.04598	0	0.966545	0
671	10.1165	0	10.5158	0	10.3162	0
672	8.85407	0	11.4124	0	10.1332	0
673	3.13901	0	3.13793	0	3.13847	0
674	1.31361	0	1.96121	-0.0186782	1.63741	-0.00933909
675	1.31361	0	2.01724	0	1.66543	0
676	1.05771	0	1.55029	0	1.304	0
677	1.50127	0	1.84914	0	1.6752	0
678	1.41597	0	1.84914	0	1.63255	0
679	0.238838	0	0.541667	-0.0186782	0.390253	-0.00933909
680	1.34773	0	1.51293	0	1.43033	0
681	0.614155	0	0.691093	0	0.652624	0
682	1.22831	0	1.30747	0	1.26789	0
683	1.97894	-0.0511796	2.80173	0	2.39034	-0.0255898
684	2.47368	-0.0170599	3.00719	-0.0186782	2.74043	-0.017869
685	2.13248	0	2.27874	0	2.20561	0
686	1.92776	-0.0170599	1.60632	0	1.76704	-0.00852993
687	0.989472	0	1.12069	0	1.05508	0
688	0.341197	0	0.168104	0	0.25465	0
689	2.91724	0	3.04454	0	2.98089	0
690	3.34373	0	3.64225	0	3.49299	0
691	2.66134	0	2.61495	0	2.63814	0
692	1.84246	0	1.94253	0	1.8925	0
693	10.9183	0	13.2428	0	12.0806	0
694	9.63882	0	10.8707	-0.0186782	10.2548	-0.00933909
695	6.53393	0	8.19972	0	7.36682	0
696	2.81488	0	3.81035	0	3.31261	0
697	4.2479	-0.0170599	5.93966	0	5.09378	-0.00852993
698	1.50127	0	1.43822	0	1.46974	0
699	2.6784	0	4.1092	0	3.3938	0
700	3.29255	0	4.38937	-0.0186782	3.84096	-0.00933909
701	0.290018	0	0.168104	0	0.229061	0
702	1.48421	0	1.64368	0	1.56394	0
703	5.30562	0	5.02443	0	5.16502	0
704	1.29655	-0.0170599	1.10201	0	1.19928	-0.00852993
705	3.63375	0	3.90374	0	3.76874	0
706	5.64681	-0.0341197	6.92961	-0.0186782	6.28821	-0.0263989
707	2.64428	0	2.39081	0	2.51754	0
708	0.682394	0	0.765805	0	0.7241	0
709	3.37785	0	3.5115	0	3.44468	0
710	11.4813	-0.0170599	14.8492	0	13.1652	-0.00852993
711	2.13248	0	2.18535	0	2.15891	0
712	1.60363	0	1.79311	0	1.69837	0
713	7.96695	-0.0341197	9.56323	0	8.76509	-0.0170599
714	0.187658	0	0.298851	0	0.243255	0
715	0.682394	0	0.765805	0	0.7241	0
716	0.324137	0	0.840518	0	0.582328	0
717	0.136479	0	0.112069	0	0.124274	0
718	0.119419	0	0.0933909	0	0.106405	0
719	0.204718	0	0.186782	0	0.19575	0
720	0.170599	-0.0170599	0.336207	0	0.253403	-0.00852993
721	0.0341197	0	0.0373564	0	0.035738	0
722	0.375317	0	0.448276	-0.0186782	0.411797	-0.00933909
723	0.409437	0	0.541667	0	0.475552	0
724	2.69546	-0.0170599	3.30604	-0.0186782	3.00075	-0.017869
725	4.65734	0	5.3046	0	4.98097	0
726	4.17967	-0.0170599	4.09052	0	4.13509	-0.00852993
727	1.45009	-0.0170599	1.69971	0	1.5749	-0.00852993
728	1.19419	0	1.25144	0	1.22281	0
729	4.70852	0	5.9957	0	5.35211	0
730	1.94482	0	3.00719	0	2.47601	0
731	0.699454	0	0.504311	0	0.601883	0
732	0.597095	0	0.504311	0	0.550703	0
733	0.597095	0	0.597702	0	0.597398	0
734	3.46315	-0.0341197	4.35202	0	3.90758	-0.0170599
735	1.00653	0	0.672415	0	0.839473	0
736	1.29655	0	0.989944	0	1.14325	0
737	0.272958	0	0.186782	0	0.22987	0
738	1.05771	0	2.11063	0	1.58417	0
739	2.69546	0	2.6523	0	2.67388	0
740	2.1666	0	1.84914	0	2.00787	0
741	4.77676	0	5.60345	0	5.19011	0
742	4.5891	0	5.22989	0	4.9095	0
743	10.4918	0	11.2629	0	10.8774	0
744	2.37132	0	2.24138	-0.0186782	2.30635	-0.00933909
745	13.5626	-0.0341197	16.5489	0	15.0557	-0.0170599
746	5.57857	0	7.52731	0	6.55294	0
747	2.6784	0	1.83046	0	2.25443	0
748	6.12449	0	6.72415	0	6.42432	0
749	0.443556	0	0.354885	0	0.399221	0
750	0.767694	0	0.560345	0	0.66402	0
751	0.426496	0	0.242816	0	0.334656	0
752	0.665334	0	1.08333	0	0.874335	0
753	2.66134	0	3.25	-0.0186782	2.95567	-0.00933909
754	1.87658	0	1.90517	0	1.89088	0
755	8.15461	0	8.06897	0	8.11179	0
756	2.3372	-0.0170599	2.46552	0	2.40136	-0.00852993
757	7.83048	0	9.93679	0	8.88363	0
758	1.62069	0	1.43822	0	1.52945	0
759	1.43303	0	1.40086	0	1.41695	0
760	3.61669	0	4.03449	0	3.82559	0
761	1.24537	0	1.28879	0	1.26708	0
762	1.50127	0	1.58765	0	1.54446	0
763	0.528856	0	0.336207	0	0.432531	0
764	0.358257	0	0.242816	0	0.300537	0
765	1.9107	0	2.44684	-0.0186782	2.17877	-0.00933909
766	0.324137	0	0.373564	-0.0186782	0.34885	-0.00933909
767	3.34373	0	3.17529	0	3.25951	0
768	9.53646	0	12.0848	0	10.8106	0
769	1.72305	0	1.58765	0	1.65535	0
770	5.1009	0	5.90231	0	5.5016	0
771	4.64028	0	4.76294	0	4.70161	0
772	3.51433	-0.0170599	3.39943	0	3.45688	-0.00852993
773	1.65481	0	1.25144	0	1.45312	0
774	6.09037	0	7.50863	-0.0186782	6.7995	-0.00933909
775	0.545915	0	0.747127	0	0.646521	0
776	1.19419	0	1.13937	0	1.16678	0
777	0.426496	0	0.317529	0	0.372013	0
778	0.102359	0	0.186782	0	0.14457	0
779	5.57857	0	7.3592	0	6.46889	0
780	0.955352	0	1.66236	0	1.30886	0
781	2.37132	0	2.68966	0	2.53049	0
782	2.20072	0	2.80173	0	2.50122	0
783	0.392377	0	0.504311	0	0.448344	0
784	0.733574	0	0.709771	0	0.721672	0
785	0.955352	0	1.32615	0	1.14075	0
786	3.59963	0	4.01581	0	3.80772	0
787	0.835933	0	0.691093	0	0.763513	0
788	8.70053	0	10.1796	-0.0186782	9.44007	-0.00933909
789	4.00907	0	4.63219	0	4.32063	0
790	1.02359	0	1.15805	0	1.09082	0
791	3.83847	0	4.48276	0	4.16062	0
792	5.04972	0	6.66811	-0.0186782	5.85891	-0.00933909
793	2.21778	0	1.66236	-0.0186782	1.94007	-0.00933909
794	3.13901	0	3.0819	-0.0186782	3.11046	-0.00933909
795	6.41451	0	6.20116	0	6.30783	0
796	19.2947	0	21.4052	0	20.3499	0
797	0.614155	0	0.541667	0	0.577911	0
798	0.409437	0	0.691093	0	0.550265	0
799	1.89364	0	3.04454	0	2.46909	0
800	0.921232	0	0.803162	0	0.862197	0
801	2.849	0	3.41811	0	3.13355	0
802	3.20725	0	3.36207	0	3.28466	0
803	0.443556	0	0.336207	0	0.389882	0
804	0.767694	0	0.541667	-0.0186782	0.65468	-0.00933909
805	0.818873	0	0.597702	0	0.708288	0
806	8.58111	0	9.45116	-0.0373564	9.01613	-0.0186782
807	5.1009	0	4.87501	0	4.98795	0
808	20.506	-0.0170599	25.4397	0	22.9728	-0.00852993
809	2.2519	0	3.17529	0	2.7136	0
810	0.375317	0	0.373564	0	0.37444	0
811	0.631215	0	0.672415	0	0.651815	0
812	4.81088	0	5.9957	0	5.40329	0
813	0.955352	0	1.34483	0	1.15009	0
814	0.358257	0	0.354885	0	0.356571	0
815	0.545915	0	0.82184	0	0.683878	0
816	0.562975	0	0.803162	0	0.683069	0
817	1.12595	0	1.04598	0	1.08596	0
818	0.614155	0	0.504311	0	0.559233	0
819	0.767694	0	0.82184	0	0.794767	0
820	0.989472	0	1.36351	0	1.17649	0
821	1.22831	0	1.04598	0	1.13714	0
822	1.39891	0	1.00862	0	1.20377	0
823	0.528856	0	0.653736	-0.0747127	0.591296	-0.0373564
824	20.6254	-0.0852993	25.4584	-0.0560345	23.0419	-0.0706669
825	2.20072	-0.0511796	2.31609	-0.0373564	2.25841	-0.044268
826	1.00653	-0.0511796	1.43822	0	1.22238	-0.0255898
827	0.545915	0	0.485633	0	0.515774	0
828	1.55245	-0.0170599	2.0546	-0.0186782	1.80352	-0.017869
829	1.62069	-0.0682394	2.0546	0	1.83764	-0.0341197
830	6.87512	-0.0170599	8.8161	0	7.84561	-0.00852993
831	3.19019	0	3.79167	0	3.49093	0
832	1.56951	0	2.24138	0	1.90544	0
833	0.477676	0	0.504311	0	0.490993	0
834	0.409437	0	0.709771	0	0.559604	0
835	0.443556	0	0.747127	0	0.595342	0
836	0.0511796	0	0.0560345	0	0.0536071	0
837	1.58657	0	1.79311	-0.0186782	1.68984	-0.00933909
838	0.528856	0	0.691093	0	0.609974	0
839	0.562975	0	0.522989	0	0.542982	0
840	0.204718	0	0.261495	0	0.233106	0
841	0.136479	0	0.168104	0	0.152291	0
842	0.750634	0	0.61638	0	0.683507	0
843	0.477676	0	0.840518	0	0.659097	0
844	7.59164	-0.0170599	8.68535	0	8.1385	-0.00852993
845	0.597095	0	0.989944	0	0.793519	0
846	2.43956	0	3.0819	0	2.76073	0
847	1.70599	0	2.03592	0	1.87095	0
848	2.45662	0	2.67098	0	2.5638	0
849	2.30308	0	2.44684	0	2.37496	0
850	0.767694	0	1.00862	0	0.888158	0
851	3.75317	0	4.33334	0	4.04325	0
852	0.324137	0	0.448276	0	0.386207	0
853	2.4225	0	2.55891	0	2.49071	0
854	0.307077	0	0.224138	0	0.265608	0
855	0.852993	0	0.933909	-0.0186782	0.893451	-0.00933909
856	0.972412	0	1.17673	0	1.07457	0
857	0.852993	0	0.635058	0	0.744026	0
858	0.255898	0	0.0560345	0	0.155966	0
859	0.358257	0	0.522989	0	0.440623	0
860	1.12595	0	1.00862	0	1.06729	0
861	2.30308	0	2.63362	0	2.46835	0
862	0.187658	0	0.224138	0	0.205898	0
863	2.64428	-0.0341197	2.44684	0	2.54556	-0.0170599
864	2.91724	0	2.87644	0	2.89684	0
865	0.255898	0	0.429598	0	0.342748	0
866	7.88165	-0.0341197	11.9167	0	9.89917	-0.0170599
867	3.05371	-0.0170599	3.23133	-0.0373564	3.14252	-0.0272081
868	1.07477	0	1.40086	0	1.23782	0
869	2.90018	0	3.26868	0	3.08443	0
870	4.5891	-0.0170599	5.67817	-0.0186782	5.13363	-0.017869
871	0.614155	0	0.61638	0	0.615267	0
872	0.682394	0	0.653736	0	0.668065	0
873	0.511796	0	0.336207	0	0.424002	0
874	2.96842	0	3.32472	0	3.14657	0
875	0.835933	0	1.13937	0	0.987651	0
876	1.77423	0	2.11063	0	1.94243	0
877	3.99201	0	6.10777	0	5.04989	0
878	0.904173	0	0.803162	0	0.853667	0
879	0.818873	0	1.21408	0	1.01648	0
880	0.562975	0	0.597702	0	0.580339	0
881	5.13502	0	6.07041	0	5.60271	0
882	0.699454	0	0.840518	0	0.769986	0
883	3.27549	-0.0170599	3.79167	-0.0186782	3.53358	-0.017869
884	16.6163	-0.0170599	20.5647	0	18.5905	-0.00852993
885	0.477676	-0.0170599	0.579024	-0.0186782	0.52835	-0.017869
886	0.307077	0	0.392242	0	0.34966	0
887	5.2715	0	6.3319	0	5.8017	0
888	0.392377	0	0.522989	0	0.457683	0
889	0.477676	0	0.466955	0	0.472315	0
890	0.0341197	0	0.0933909	0	0.0637553	0
891	1.17713	0	1.56897	-0.0373564	1.37305	-0.0186782
892	0.409437	0	0.20546	0	0.307448	0
893	1.17713	0	1.99857	-0.0186782	1.58785	-0.00933909
894	1.24537	0	2.01724	0	1.63131	0
895	0.665334	0	1.0273	0	0.846317	0
896	1.16007	0	1.41954	0	1.28981	0
897	0.187658	0	0.0560345	0	0.121846	0
898	0.989472	0	0.952587	0	0.97103	0
899	0.852993	0	1.27012	0	1.06155	0
900	1.87658	0	2.52155	0	2.19907	0
901	5.54445	0	7.1911	0	6.36778	0
902	0.221778	0	0.224138	0	0.222958	0
903	0.255898	0	0.429598	0	0.342748	0
904	0.102359	0	0.0373564	0	0.0698578	0
905	0.426496	0	0.485633	0	0.456065	0
906	0.0170599	0	0.130747	0	0.0739036	0
907	0.580035	0	1.0273	0	0.803668	0
908	2.71252	0	3.36207	0	3.0373	0
909	0.221778	0	0.280173	0	0.250975	0
910	0.170599	0	0.317529	0	0.244064	0
911	0.341197	0	0.298851	0	0.320024	0
912	0.733574	0	0.672415	0	0.702994	0
913	0.597095	0	0.485633	0	0.541364	0
914	0.255898	0	0.298851	0	0.277374	0
915	0.324137	0	0.541667	0	0.432902	0
916	0.375317	0	0.448276	0	0.411797	0
917	0.648275	0	0.672415	0	0.660345	0
918	0.750634	0	0.840518	0	0.795576	0
919	0.324137	0	0.242816	0	0.283477	0
920	1.04065	0	1.38219	-0.0186782	1.21142	-0.00933909
921	0.716514	0	0.466955	0	0.591734	0
922	1.50127	0	1.68104	0	1.59115	0
923	1.41597	0	1.71839	-0.0186782	1.56718	-0.00933909
924	8.22285	-0.0170599	11.954	-0.0560345	10.0884	-0.0365472
925	1.9107	0	2.4842	0	2.19745	0
926	1.34773	0	1.99857	0	1.67315	0
927	0.852993	0	0.915231	0	0.884112	0
928	0.221778	0	0.149425	0	0.185602	0
929	2.09836	0	2.26006	0	2.17921	0
930	3.54845	0	4.76294	0	4.15569	0
931	3.12195	0	4.12788	0	3.62492	0
932	1.21125	0	0.522989	0	0.86712	0
933	0.119419	0	0.0933909	0	0.106405	0
934	6.82394	0	9.17099	0	7.99747	0
935	0.443556	0	0.691093	0	0.567325	0
936	0.733574	-0.0170599	0.653736	0	0.693655	-0.00852993
937	0.272958	0	0.61638	0	0.444669	0
938	0.665334	0	0.691093	-0.0186782	0.678214	-0.00933909
939	0.528856	0	0.653736	0	0.591296	0
940	1.12595	0	0.709771	0	0.917861	0
941	1.10889	0	1.04598	0	1.07743	0
942	0.392377	0	0.765805	0	0.579091	0
943	2.18366	0	2.35345	0	2.26856	0
944	0.699454	0	0.859196	0	0.779325	0
945	11.7884	0	13.3549	0	12.5716	0
946	6.34627	0	5.64081	0	5.99354	0
947	26.6304	-0.0341197	33.4339	-0.0186782	30.0322	-0.0263989
948	1.55245	0	3.10058	0	2.32651	0
949	0.272958	0	0.373564	0	0.323261	0
950	0.614155	0	0.541667	0	0.577911	0
951	0.290018	0	0.504311	0	0.397164	0
952	0.187658	0	0.298851	0	0.243255	0
953	0.0852993	0	0.130747	0	0.108023	0
954	0.545915	0	0.709771	0	0.627843	0
955	0.119419	0	0.0933909	0	0.106405	0
956	0.187658	0	0.522989	0	0.355324	0
957	0.699454	0	1.04598	0	0.872716	0
958	0.426496	0	0.354885	0	0.390691	0
959	1.09183	0	1.56897	0	1.3304	0
960	0.784754	0	1.10201	0	0.943383	0
961	0	0	0.0933909	0	0.0466955	0
962	0.153539	0	0.0933909	0	0.123465	0
963	0.119419	0	0.242816	0	0.181118	0
964	1.17713	0	1.38219	0	1.27966	0
965	0.119419	0	0.149425	0	0.134422	0
966	0.0170599	0	0	0	0.00852993	0
967	0.324137	0	0.82184	0	0.572989	0
968	0	0	0.0373564	0	0.0186782	0
969	0.0852993	0	0.0373564	0	0.0613278	0
970	0.0341197	0	0.0560345	0	0.0450771	0
971	0.0511796	0	0.0560345	0	0.0536071	0
972	0.0170599	0	0.0560345	0	0.0365472	0
973	0	0	0.112069	0	0.0560345	0
974	0.0511796	0	0.0373564	0	0.044268	0
975	0.0341197	0	0.0186782	0	0.0263989	0
976	0	0	0	0	0	0
977	0	0	0	0	0	0
978	0	0	0.0373564	0	0.0186782	0
979	0	0	0	0	0	0
980	0.0341197	0	0	0	0.0170599	0
981	0	0	0.0373564	0	0.0186782	0
982	0	0	0.0186782	0	0.00933909	0
983	0	0	0	0	0	0
984	0.0341197	0	0	0	0.0170599	0
985	0.0511796	0	0.0560345	0	0.0536071	0
986	0.0852993	0	0	0	0.0426496	0
987	0.0511796	0	0.0560345	0	0.0536071	0
988	0.0170599	0	0	0	0.00852993	0
989	0	0	0	0	0	0
990	0	0	0	0	0	0
991	0.0341197	0	0	0	0.0170599	0
992	0.0682394	0	0.0933909	0	0.0808152	0
993	0.0682394	0	0.0186782	0	0.0434588	0
994	0.153539	0	0.242816	0	0.198178	0
995	0.0170599	0	0.0747127	0	0.0458863	0
996	0.0511796	0	0	0	0.0255898	0
997	0.0170599	0	0	0	0.00852993	0
998	0.0682394	0	0.0373564	0	0.0527979	0
999	0.0341197	0	0.0186782	0	0.0263989	0
1000	0.0511796	0	0.0373564	0	0.044268	0
1001	0	0	0.0933909	0	0.0466955	0
1002	0	0	0.0747127	0	0.0373564	0
1003	0	0	0	0	0	0
1004	0	0	0	0	0	0
1005	0	0	0	0	0	0
1006	0	0	0	0	0	0
1007	0	0	0	0	0	0
1008	0.102359	0	0.0373564	0	0.0698578	0
1009	0.0170599	0	0.0373564	0	0.0272081	0
1010	0.0170599	0	0.0747127	0	0.0458863	0
1011	0	0	0	0	0	0
1012	0.0511796	0	0	0	0.0255898	0
1013	0	0	0	0	0	0
1014	0	0	0	0	0	0
1015	0	0	0	0	0	0
1016	0	0	0	0	0	0
1017	0	0	0	0	0	0
1018	0	0	0	0	0	0
1019	0	0	0	0	0	0
1020	0	-0.0170599	0	0	0	-0.00852993
1021	0	0	0	0	0	0
1022	0	0	0	0	0	0
1023	0	0	0	0	0	0
1024	0	0	0	0	0	0
1025	0	0	0	0	0	0
1026	0	0	0	0	0	0
1027	0	0	0	0	0	0
1028	0	0	0.0186782	0	0.00933909	0
1029	0	0	0	0	0	0
1030	0	0	0.0186782	0	0.00933909	0
1031	0	0	0	0	0	0
1032	0	0	0	0	0	0
1033	0	0	0	0	0	0
1034	0	0	0	0	0	0
1035	0	0	0	0	0	0
1036	0	0	0	0	0	0
1037	0	0	0	0	0	0
1038	0	0	0.0373564	0	0.0186782	0
1039	0	0	0	0	0	0
1040	0	0	0	0	0	0
1041	0	0	0	0	0	0
1042	0	0	0	0	0	0
1043	0	0	0	0	0	0
1044	0	0	0	0	0	0
1045	0	0	0	0	0	0
1046	0	0	0	0	0	0
1047	0	0	0	0	0	0
1048	0	0	0.0186782	0	0.00933909	0
1049	0	0	0	0	0	0
1050	0	0	0	0	0	0
1051	0	0	0	0	0	0
1052	0	0	0	0	0	0
1053	0	0	0	0	0	0
1054	0	0	0	0	0	0
1055	0.0341197	0	0.0186782	0	0.0263989	0
1056	0	0	0	0	0	0
1057	0.0511796	0	0	0	0.0255898	0
1058	0.0170599	0	0.0186782	0	0.017869	0
1059	0.0341197	0	0	-0.0186782	0.0170599	-0.00933909
1060	0	0	0	0	0	0
1061	0.0170599	0	0	0	0.00852993	0
1062	0	0	0	0	0	0
1063	0	0	0	0	0	0
1064	0	0	0.0186782	0	0.00933909	0
1065	0	0	0	0	0	0
1066	0	0	0	0	0	0
1067	0	0	0	0	0	0
1068	0	0	0	0	0	0
1069	0	0	0	-0.0186782	0	-0.00933909
1070	0	0	0	0	0	0
1071	0	0	0	0	0	0
1072	0	0	0	0	0	0
1073	0	0	0	0	0	0
1074	0	0	0	0	0	0
1075	0	0	0	0	0	0
1076	0	0	0	0	0	0
1077	0	0	0	0	0	0
1078	0	0	0	0	0	0
1079	0	0	0	0	0	0
1080	0	0	0	0	0	0
1081	0	0	0	0	0	0
1082	0	0	0	-0.0186782	0	-0.00933909
1083	0	0	0	0	0	0
1084	0	0	0	-0.0373564	0	-0.0186782
1085	0	0	0	-0.0186782	0	-0.00933909
1086	0	0	0	0	0	0
1087	0	-0.0341197	0	-0.0560345	0	-0.0450771
1088	0	0	0	0	0	0
1089	0	0	0	-0.0186782	0	-0.00933909
1090	0	-0.0170599	0	0	0	-0.00852993
1091	0	0	0	0	0	0
1092	0	0	0.0186782	0	0.00933909	0
1093	0	-0.0341197	0	0	0	-0.0170599
1094	0	-0.0511796	0	-0.0933909	0	-0.0722852
1095	0	0	0	-0.0186782	0	-0.00933909
1096	0	-0.0511796	0	-0.112069	0	-0.0816243
1097	0	-0.153539	0	-0.504311	0	-0.328925
1098	0	-0.0852993	0	-0.0560345	0	-0.0706669
1099	0	-0.0170599	0	-0.112069	0	-0.0645645
1100	0	-0.102359	0	-0.149425	0	-0.125892
1101	0	-0.290018	0	-0.522989	0	-0.406503
1102	0	0	0	-0.0373564	0	-0.0186782
1103	0	-0.0682394	0	-0.0560345	0	-0.062137
1104	0	-0.136479	0	-0.20546	0	-0.170969
1105	0	-0.204718	0	-0.242816	0	-0.223767
1106	0	-0.0341197	0	0	0	-0.0170599
1107	0	-0.716514	0	-1.23276	0	-0.974637
1108	0	0	0	-0.0747127	0	-0.0373564
1109	0	-0.0682394	0	-0.0373564	0	-0.0527979
1110	0.0170599	-0.0341197	0	-0.0373564	0.00852993	-0.035738
1111	0	-0.119419	0	-0.298851	0	-0.209135
1112	0	-0.0341197	0	-0.0933909	0	-0.0637553
1113	0	0	0	0	0	0
1114	0	0	0	0	0	0
1115	0	-0.0170599	0	-0.0373564	0	-0.0272081
1116	0	-0.0170599	0	-0.0560345	0	-0.0365472
1117	0.0170599	0	0	0	0.00852993	0
1118	0	-0.0852993	0	-0.0373564	0	-0.0613278
1119	0	-0.255898	0	-0.635058	0	-0.445478
1120	0	0	0	0	0	0
1121	0	-0.528856	0	-1.04598	0	-0.787417
1122	0	-0.0170599	0	-0.0186782	0	-0.017869
1123	0	-0.136479	0	-0.0373564	0	-0.0869176
1124	0	0	0	-0.112069	0	-0.0560345
1125	0	-0.0682394	0	-0.0373564	0	-0.0527979
1126	0	-0.0341197	0	-0.0186782	0	-0.0263989
1127	0	0	0	-0.0186782	0	-0.00933909
1128	0	-0.0682394	0	-0.0747127	0	-0.0714761
1129	0	0	0	-0.0373564	0	-0.0186782
1130	0	0	0	0	0	0
1131	0	-0.0170599	0	-0.0373564	0	-0.0272081
1132	0	-0.0511796	0	-0.0186782	0	-0.0349289
1133	0	-0.0852993	0	-0.0186782	0	-0.0519887
1134	0	0	0	0	0	0
1135	0	-0.0341197	0	-0.0186782	0	-0.0263989
1136	0	-0.0341197	0	-0.149425	0	-0.0917726
1137	0	0	0	-0.0186782	0	-0.00933909
1138	0	0	0	-0.0186782	0	-0.00933909
1139	0	0	0	-0.0186782	0	-0.00933909
1140	0.0170599	0	0	0	0.00852993	0
1141	0	0	0	0	0	0
1142	0	0	0	-0.0560345	0	-0.0280173
1143	0	-0.153539	0	-0.0933909	0	-0.123465
1144	0	-0.0341197	0	-0.112069	0	-0.0730944
1145	0	-0.0682394	0	-0.0747127	0	-0.0714761
1146	0	-0.0511796	0	-0.168104	0	-0.109642
1147	0	-0.0852993	0	-0.112069	0	-0.0986842
1148	0	0	0	-0.0933909	0	-0.0466955
1149	0	0	0	-0.0186782	0	-0.00933909
1150	0	-0.0170599	0	-0.0186782	0	-0.017869
1151	0.0170599	-0.0852993	0	-0.130747	0.00852993	-0.108023
1152	0	0	0.0186782	-0.0747127	0.00933909	-0.0373564
1153	0	-0.102359	0	-0.298851	0	-0.200605
1154	0	-0.0341197	0	-0.168104	0	-0.101112
1155	0	-1.36479	0	-2.50288	0	-1.93383
1156	0	-1.50127	0	-2.96983	0	-2.23555
1157	0	-0.204718	0	-0.448276	0	-0.326497
1158	0	-0.426496	0	-0.877875	0	-0.652186
1159	0	-0.187658	0	-0.280173	0	-0.233916
1160	0	-0.136479	0	-0.130747	0	-0.133613
1161	0	-0.153539	0	-0.20546	0	-0.179499
1162	0	-0.0170599	0	-0.0933909	0	-0.0552254
1163	0	-0.0341197	0	-0.168104	0	-0.101112
1164	0	-0.0170599	0	-0.0560345	0	-0.0365472
1165	0	-0.0170599	0	-0.0560345	0	-0.0365472
1166	0	-0.0511796	0	-0.0373564	0	-0.044268
1167	0	-0.0170599	0	-0.0186782	0	-0.017869
1168	0	-0.392377	0	-0.672415	0	-0.532396
1169	0	-0.119419	0	-0.429598	0	-0.274509
1170	0	0	0	-0.0186782	0	-0.00933909
1171	0	-0.0341197	0	-0.0373564	0	-0.035738
1172	0	-0.0682394	0	-0.0933909	0	-0.0808152
1173	0	-0.0170599	0	-0.0747127	0	-0.0458863
1174	0	0	0	0	0	0
1175	0.0341197	-0.0511796	0.0373564	-0.0933909	0.035738	-0.0722852
1176	0	0	0	0	0	0
1177	0	0	0	0	0	0
1178	0	0	0	0	0	0
1179	0	0	0	0	0	0
1180	0	0	0	-0.0373564	0	-0.0186782
1181	0	0	0	0	0	0
1182	0	0	0	0	0	0
1183	0	0	0	-0.0560345	0	-0.0280173
1184	0	-0.0511796	0	-0.0373564	0	-0.044268
1185	0	-0.0852993	0	-0.224138	0	-0.154719
1186	0	-0.0170599	0	-0.0933909	0	-0.0552254
1187	0	-0.0170599	0	-0.0186782	0	-0.017869
1188	0	0	0	-0.130747	0	-0.0653736
1189	0	-0.0170599	0	-0.0560345	0	-0.0365472
1190	0	-0.0341197	0	-0.0560345	0	-0.0450771
1191	0	-0.0170599	0	0	0	-0.00852993
1192	0	-0.0852993	0	-0.0186782	0	-0.0519887
1193	0	0	0	-0.0186782	0	-0.00933909
1194	0	0	0	0	0	0
1195	0	-0.0170599	0	0	0	-0.00852993
1196	0	-0.0170599	0	-0.0747127	0	-0.0458863
1197	0.0170599	0	0	-0.0186782	0.00852993	-0.00933909
1198	0	-0.187658	0	-0.224138	0	-0.205898
1199	0	-0.170599	0	-0.373564	0	-0.272081
1200	0	-0.358257	0	-0.373564	0	-0.36591
1201	0	0	0	-0.0560345	0	-0.0280173
1202	0	0	0	-0.0747127	0	-0.0373564
1203	0	0	0	0	0	0
1204	0	-0.0170599	0	-0.0560345	0	-0.0365472
1205	0.0170599	0	0	-0.0560345	0.00852993	-0.0280173
1206	0	-0.102359	0	-0.0747127	0	-0.0885359
1207	0	0	0	-0.0186782	0	-0.00933909
1208	0	0	0	0	0	0
1209	0	-0.290018	0	-0.579024	0	-0.434521
1210	0	-0.0511796	0	-0.0933909	0	-0.0722852
1211	0	-0.221778	0	-0.597702	0	-0.40974
1212	0	-0.0511796	0	0	0	-0.0255898
1213	0	-0.0682394	0	-0.112069	0	-0.0901543
1214	0	-0.0511796	0	-0.149425	0	-0.100303
1215	0	0	0	0	0	0
1216	0	-0.0170599	0	-0.0933909	0	-0.0552254
1217	0	-0.0170599	0	-0.0933909	0	-0.0552254
1218	0	-0.170599	0	-0.280173	0	-0.225386
1219	0	-0.0341197	0	-0.242816	0	-0.138468
1220	0.0170599	-0.187658	0	-0.20546	0.00852993	-0.196559
1221	0	-0.0341197	0	-0.0933909	0	-0.0637553
1222	0	-0.0852993	0	-0.0373564	0	-0.0613278
1223	0	-0.0682394	0	-0.224138	0	-0.146189
1224	0	-0.204718	0	-0.261495	0	-0.233106
1225	0	-0.494736	0	-1.28879	0	-0.891765
1226	0	-0.324137	0	-0.541667	0	-0.432902
1227	0	-0.904173	0	-1.27012	0	-1.08714
1228	0	-0.221778	0	-0.373564	0	-0.297671
1229	0	-0.443556	0	-0.466955	0	-0.455255
1230	0	-0.272958	0	-0.392242	0	-0.3326
1231	0	-0.136479	0	-0.504311	0	-0.320395
1232	0	-0.153539	0	-0.0747127	0	-0.114126
1233	0	-0.0852993	0	-0.149425	0	-0.117362
1234	0	-0.0170599	0	-0.0373564	0	-0.0272081
1235	0	0	0	-0.0747127	0	-0.0373564
1236	0	-0.0511796	0	-0.0747127	0	-0.0629462
1237	0	-1.89364	0	-2.27874	0	-2.08619
1238	0	-0.614155	0	-0.989944	0	-0.802049
1239	0	-1.26243	0	-1.8865	0	-1.57446
1240	0	-0.238838	0	-0.522989	0	-0.380914
1241	0	-0.204718	0	-0.466955	0	-0.335836
1242	0.0170599	-1.92776	0	-3.13793	0.00852993	-2.53285
1243	0	-0.0852993	0	-0.261495	0	-0.173397
1244	0	-0.580035	0	-0.915231	0	-0.747633
1245	0	-0.341197	0	-0.41092	0	-0.376059
1246	0.0170599	-0.665334	0	-0.522989	0.00852993	-0.594162
1247	0	-0.0682394	0	-0.242816	0	-0.155528
1248	0	-0.545915	0	-0.560345	0	-0.55313
1249	0	-1.00653	0	-1.28879	0	-1.14766
1250	0	-1.45009	0	-2.16667	0	-1.80838
1251	0	-0.136479	0	-0.224138	0	-0.180309
1252	0	-0.597095	0	-0.560345	0	-0.57872
1253	0	-0.0682394	0	-0.130747	0	-0.0994934
1254	0	-0.0511796	0	-0.0186782	0	-0.0349289
1255	0	-0.170599	0	-0.149425	0	-0.160012
1256	0	-0.255898	0	-0.317529	0	-0.286713
1257	0	-0.699454	0	-0.989944	0	-0.844699
1258	0	0	0	0	0	0
1259	0	-0.238838	0.0186782	-0.336207	0.00933909	-0.287523
1260	0	-4.28202	0	-5.88363	0	-5.08283
1261	0	-0.324137	0.0186782	-0.317529	0.00933909	-0.320833
1262	0	-1.29655	0	-2.01724	0	-1.6569
1263	0	-0.887113	0	-0.82184	0	-0.854476
1264	0	-0.307077	0	-0.298851	0	-0.302964
1265	0	-0.0852993	0	-0.0560345	0	-0.0706669
1266	0	-0.170599	0	-0.112069	0	-0.141334
1267	0	-0.0511796	0	-0.0933909	0	-0.0722852
1268	0	-1.45009	0.0186782	-1.83046	0.00933909	-1.64027
1269	0	-0.272958	0	-0.20546	0	-0.239209
1270	0	-0.0170599	0	-0.0747127	0	-0.0458863
1271	0	-0.0852993	0	-0.130747	0	-0.108023
1272	0	0	0	-0.112069	0	-0.0560345
1273	0	-0.0170599	0	-0.149425	0	-0.0832427
1274	0	-0.119419	0	-0.0747127	0	-0.0970659
1275	0	-0.170599	0	-0.242816	0	-0.206707
1276	0	-0.136479	0	-0.0560345	0	-0.0962567
1277	0	-0.477676	0.0373564	-0.429598	0.0186782	-0.453637
1278	0	-0.0682394	0	-0.0747127	0	-0.0714761
1279	0	-0.221778	0	-0.317529	0	-0.269654
1280	0	-0.0511796	0	-0.149425	0	-0.100303
1281	0	-0.494736	0	-0.597702	0	-0.546219
1282	0	-0.272958	0	-0.504311	0	-0.388634
1283	0	-0.989472	0	-1.25144	0	-1.12045
1284	0	-0.443556	0	-0.877875	0	-0.660715
1285	0	-0.204718	0	-0.41092	0	-0.307819
1286	0	-0.272958	0	-0.261495	0	-0.267226
1287	0	-0.119419	0	-0.0560345	0	-0.0877268
1288	0	-0.187658	0	-0.280173	0	-0.233916
1289	0	-0.0341197	0	-0.0747127	0	-0.0544162
1290	0	-0.528856	0	-0.765805	0	-0.647331
1291	0	0	0	-0.0560345	0	-0.0280173
1292	0	-0.136479	0	-0.149425	0	-0.142952
1293	0	-0.358257	0.0186782	-0.317529	0.00933909	-0.337893
1294	0	-0.307077	0	-0.317529	0	-0.312303
1295	0	-1.53539	0	-1.99857	0	-1.76698
1296	0	-1.29655	0	-1.4569	0	-1.37672
1297	0	-1.12595	0	-1.04598	0	-1.08596
1298	0	-0.631215	0	-1.0273	0	-0.829257
1299	0	-0.324137	0	-0.653736	0	-0.488937
1300	0	-0.358257	0.0186782	-0.560345	0.00933909	-0.459301
1301	0.0511796	-0.119419	0	-0.0560345	0.0255898	-0.0877268
1302	0	-0.0852993	0.0186782	-0.168104	0.00933909	-0.126701
1303	0	-0.119419	0	-0.373564	0	-0.246491
1304	0	-0.255898	0	-0.317529	0	-0.286713
1305	0	-0.0341197	0	-0.0933909	0	-0.0637553
1306	0	-0.307077	0	-0.429598	0	-0.368338
1307	0	-0.648275	0	-1.30747	0	-0.977874
1308	0	-0.272958	0	-0.709771	0	-0.491364
1309	0	-0.0682394	0	-0.20546	0	-0.13685
1310	0	-1.84246	0	-2.11063	0	-1.97655
1311	0	-0.204718	0	-0.224138	0	-0.214428
1312	0	-0.153539	0	-0.168104	0	-0.160821
1313	0	-0.597095	0	-0.61638	0	-0.606738
1314	0	-0.0511796	0	-0.112069	0	-0.0816243
1315	0	-0.204718	0	-0.373564	0	-0.289141
1316	0	-0.733574	0	-1.10201	0	-0.917793
1317	0	-0.204718	0	-0.41092	0	-0.307819
1318	0	-0.443556	0	-0.392242	0	-0.417899
1319	0	-4.89618	0	-7.023	0	-5.95959
1320	0	-0.0170599	0	-0.0747127	0	-0.0458863
1321	0	-0.307077	0	-0.373564	0	-0.340321
1322	0	-0.204718	0	-0.261495	0	-0.233106
1323	0	-0.0682394	0	-0.0373564	0	-0.0527979
1324	0	-0.187658	0	-0.392242	0	-0.28995
1325	0	-0.170599	0	-0.392242	0	-0.28142
1326	0	-0.290018	0	-0.392242	0	-0.34113
1327	0	-0.750634	0.0186782	-1.10201	0.00933909	-0.926323
1328	0	-0.238838	0	-0.20546	0	-0.222149
1329	0	-0.290018	0	-0.597702	0	-0.44386
1330	0	-1.10889	0	-1.73707	0	-1.42298
1331	0	-0.443556	0	-0.709771	0	-0.576664
1332	0	-0.221778	0	-0.224138	0	-0.222958
1333	0	-0.187658	0	-0.186782	0	-0.18722
1334	0	-0.187658	0	-0.261495	0	-0.224576
1335	0	-0.511796	0	-0.728449	0	-0.620122
1336	0	-0.255898	0	-0.373564	0	-0.314731
1337	0	-0.477676	0	-0.653736	0	-0.565706
1338	0	-0.272958	0	-0.317529	0	-0.295243
1339	0	-0.170599	0	-0.336207	0	-0.253403
1340	0	-0.307077	0	-0.61638	0	-0.461729
1341	0.0170599	0	0	-0.0373564	0.00852993	-0.0186782
1342	0	-0.255898	0	-0.280173	0	-0.268035
1343	0	-0.0170599	0	-0.0186782	0	-0.017869
1344	0	-0.0682394	0	-0.0933909	0	-0.0808152
1345	0	-0.170599	0	-0.242816	0	-0.206707
1346	0	-3.30961	0	-4.55748	0	-3.93354
1347	0	-0.136479	0	-0.149425	0	-0.142952
1348	0	-0.614155	0	-0.971265	0	-0.79271
1349	0	-1.00653	0	-1.1954	0	-1.10097
1350	0	-0.0682394	0	-0.168104	0	-0.118172
1351	0	-0.204718	0	-0.373564	0	-0.289141
1352	0.0170599	-3.20725	0	-4.57615	0.00852993	-3.8917
1353	0	-0.0682394	0	-0.0933909	0	-0.0808152
1354	0	-0.255898	0	-0.373564	0	-0.314731
1355	0	-1.17713	0	-1.625	0	-1.40107
1356	0	-0.307077	0	-0.448276	0	-0.377677
1357	0	-0.682394	0	-0.989944	0	-0.836169
1358	0	-0.528856	0	-0.541667	0	-0.535261
1359	0	-0.0682394	0	-0.149425	0	-0.108832
1360	0	-0.119419	0	-0.112069	0	-0.115744
1361	0	-0.255898	0	-0.130747	0	-0.193323
1362	0.0511796	-0.238838	0	-0.41092	0.0255898	-0.324879
1363	0	-1.10889	0	-1.92385	0	-1.51637
1364	0.0170599	-0.0511796	0	-0.0747127	0.00852993	-0.0629462
1365	0	-0.511796	0	-0.971265	0	-0.741531
1366	0	-0.921232	0	-1.0273	0	-0.974266
1367	0	-0.511796	0	-0.485633	0	-0.498714
1368	0	-0.716514	0.0186782	-0.765805	0.00933909	-0.74116
1369	0	-0.409437	0	-0.765805	0	-0.587621
1370	0	-0.255898	0	-0.130747	0	-0.193323
1371	0	-0.170599	0	-0.485633	0	-0.328116
1372	0	-0.477676	0	-0.448276	0	-0.462976
1373	0	-0.511796	0	-0.691093	0	-0.601444
1374	0	-0.324137	0	-0.429598	0	-0.376868
1375	0	-0.272958	0	-0.261495	0	-0.267226
1376	0	-0.443556	0	-0.579024	0	-0.51129
1377	0	-0.136479	0	-0.242816	0	-0.189648
1378	0	-1.62069	0	-1.69971	0	-1.6602
1379	0	-1.55245	0	-2.70834	0	-2.13039
1380	0	-0.119419	0	-0.0933909	0	-0.106405
1381	0	-0.511796	0	-0.61638	0	-0.564088
1382	0	-0.153539	0	-0.0560345	0	-0.104787
1383	0	-1.14301	0	-1.64368	0	-1.39335
1384	0	-0.0341197	0	0	0	-0.0170599
1385	0	0	0	0	0	0
1386	0	-0.426496	0	-0.765805	0	-0.596151
1387	0	-0.443556	0	-0.784484	0	-0.61402
1388	0	-0.392377	0	-0.653736	0	-0.523057
1389	0	-0.631215	0	-1.00862	0	-0.819918
1390	0	-0.102359	0	-0.149425	0	-0.125892
1391	0	-0.238838	0	-0.186782	0	-0.21281
1392	0	-0.221778	0	-0.597702	0	-0.40974
1393	0	-0.0341197	0	0	0	-0.0170599
1394	0	-0.409437	0.0373564	-0.317529	0.0186782	-0.363483
1395	0	-0.375317	0	-0.728449	0	-0.551883
1396	0	-0.136479	0	-0.130747	0	-0.133613
1397	0	-0.119419	0	-0.0747127	0	-0.0970659
1398	0	-0.0852993	0	-0.261495	0	-0.173397
1399	0	-0.733574	0	-1.08333	0	-0.908454
1400	0	-0.409437	0	-0.41092	0	-0.410178
1401	0	-0.272958	0	-0.317529	0	-0.295243
1402	0	-0.0170599	0	-0.112069	0	-0.0645645
1403	0	-0.0511796	0	-0.0747127	0	-0.0629462
1404	0	-0.0682394	0	-0.0560345	0	-0.062137
1405	0	-0.392377	0	-0.971265	0	-0.681821
1406	0	-0.0852993	0	-0.20546	0	-0.14538
1407	0	-0.102359	0	-0.186782	0	-0.14457
1408	0	-0.187658	0	-0.20546	0	-0.196559
1409	0	-0.0170599	0	-0.0747127	0	-0.0458863
1410	0	-0.221778	0	-0.485633	0	-0.353705
1411	0	-1.80835	0	-2.61495	0	-2.21165
1412	0	-0.392377	0	-0.597702	0	-0.495039
1413	0	-0.153539	0	-0.149425	0	-0.151482
1414	0	-1.19419	0	-1.8865	0	-1.54034
1415	0	-1.14301	0.0186782	-1.23276	0.00933909	-1.18789
1416	0	-0.170599	0	-0.354885	0	-0.262742
1417	0	-0.238838	0	-0.336207	0	-0.287523
1418	0	-0.187658	0	-0.20546	0	-0.196559
1419	0	-0.119419	0	-0.0747127	0	-0.0970659
1420	0	-0.0682394	0	-0.0186782	0	-0.0434588
1421	0	-0.170599	0	-0.224138	0	-0.197368
1422	0	-0.0852993	0	-0.336207	0	-0.210753
1423	0	-0.0511796	0	-0.168104	0	-0.109642
1424	0	-0.341197	0	-0.522989	0	-0.432093
1425	0	-1.58657	0.0186782	-2.11063	0.00933909	-1.8486
1426	0	-2.30308	0	-2.83908	0	-2.57108
1427	0	-3.19019	0	-3.58621	0	-3.3882
1428	0	-0.580035	0	-0.522989	0	-0.551512
1429	0	-0.136479	0	-0.0933909	0	-0.114935
1430	0	-0.324137	0	-0.82184	0	-0.572989
1431	0.0170599	-0.272958	0	-0.317529	0.00852993	-0.295243
1432	0	-0.665334	0	-0.597702	0	-0.631518
1433	0	-0.443556	0	-0.298851	0	-0.371204
1434	0	-0.272958	0.0186782	-0.354885	0.00933909	-0.313922
1435	0	-0.392377	0	-0.672415	0	-0.532396
1436	0	-0.0852993	0	-0.298851	0	-0.192075
1437	0	-0.119419	0	-0.149425	0	-0.134422
1438	0	-0.187658	0	-0.41092	0	-0.299289
1439	0	-0.204718	0	-0.186782	0	-0.19575
1440	0	-0.136479	0	-0.504311	0	-0.320395
1441	0	-0.341197	0	-0.448276	0	-0.394737
1442	0	-0.0682394	0	-0.0747127	0	-0.0714761
1443	0	-0.324137	0	-0.41092	0	-0.367529
1444	0	-0.0852993	0	-0.168104	0	-0.126701
1445	0	-0.426496	0	-0.504311	0	-0.465404
1446	0	-0.716514	0	-1.10201	0	-0.909263
1447	0	-0.409437	0	-0.298851	0	-0.354144
1448	0	-0.0682394	0	-0.0933909	0	-0.0808152
1449	0.0170599	-0.699454	0.0186782	-0.859196	0.017869	-0.779325
1450	0	-0.255898	0	-0.298851	0	-0.277374
1451	0	-0.477676	0	-0.373564	0	-0.42562
1452	0	-0.272958	0	-0.336207	0	-0.304583
1453	0	-0.136479	0	-0.298851	0	-0.217665
1454	0	-0.153539	0	-0.112069	0	-0.132804
1455	0	-0.716514	0	-0.896553	0	-0.806533
1456	0	-0.136479	0	-0.336207	0	-0.236343
1457	0	-0.136479	0	-0.186782	0	-0.16163
1458	0	-0.597095	0.0373564	-0.803162	0.0186782	-0.700128
1459	0	-0.955352	0	-1.49425	0	-1.2248
1460	0.0170599	-2.01306	0	-2.2227	0.00852993	-2.11788
1461	0	-0.955352	0	-1.25144	0	-1.1034
1462	0	-0.477676	0	-0.803162	0	-0.640419
1463	0	-0.307077	0	-0.0933909	0	-0.200234
1464	0	-1.04065	0	-1.625	0	-1.33283
1465	0	-0.358257	0	-0.392242	0	-0.375249
1466	0	-0.801813	0	-1.40086	0	-1.10134
1467	0	-0.545915	0	-0.747127	0	-0.646521
1468	0	-0.358257	0	-0.448276	0	-0.403267
1469	0	-0.989472	0	-1.36351	0	-1.17649
1470	0	-0.272958	0	-0.466955	0	-0.369956
1471	0	-0.102359	0	-0.20546	0	-0.15391
1472	0	-0.136479	0	-0.261495	0	-0.198987
1473	0	-0.0852993	0	-0.242816	0	-0.164058
1474	0	-0.511796	0.0373564	-1.08333	0.0186782	-0.797565
1475	0	-1.43303	0	-2.29742	0	-1.86522
1476	0	-0.187658	0	-0.186782	0	-0.18722
[truncated: 1,297 more rows]

## Sheet: R-IS76 10dpi (IS76)
position	fwd 1	rev 1	fwd 2	rev 2	rightward	leftward
[truncated: 2,773 more rows]

[truncated: 9 more sheets: R-IS76 30dpi (IS76), S-IL+IS76 10dpi (IL), S-IL+IS76 10dpi (IS76), S-IL+IS76 30dpi (IL), S-IL+IS76 30dpi (IS76), R-IL+IS76 10dpi (IL), R-IL+IS76 10dpi (IS76), R-IL+IS76 30dpi (IL), R-IL+IS76 30dpi (IS76)]
